# Supplementary material for: Light Regulation of Chlorophyll and Glycoalkaloid Biosynthesis During Tuber Greening of Potato S. tuberosum
Source: Front Plant Sci. 2020 Jun 30;11:753. doi: 10.3389/fpls.2020.00753 (PMC7372192; doi:10.3389/fpls.2020.00753)
Supplement: TABLE S8 — List of selected tetrapyrrole genes used to construct Figure 6E in the order of hierarchy shown on the heat map. [file Table_3.XLSX]

## Sheet: BIN1 Tetrapyrrole TableS8
Code ()*	WL6		Blue6		Red6		WL24		Blue24		Red24		Dark (18oC)
Systematic	Normalized	Raw	Normalized	Raw	Normalized	Raw	Normalized	Raw	Normalized	Raw	Normalized	Raw	Normalized	Raw	ratio wl24/dark	PrimaryAccession	UniRef based putative functional annotation	Chromosome	putative function	peptide ID	gene ID	CDS ID	transcript ID	MpMan bin	MapMan name	MapMan pep	MapMan description	GO: CC	GO: MF	GO: BP
CUST_8583_PI426222305	0.801841	5.53737	0.738503	4.4576	0.675054	4.80303	7.09551	103.71	4.37262	36.3178	1.8786	20.8835	0.844638	6.71957	8.40066	PGSC0003DMT400058381	Pale-green and chlorophyll B reduced 2	chr01	Pale-green and chlorophyll B reduced 2	PGSC0003DMP400039308	PGSC0003DMG400022678	PGSC0003DMC400039308	PGSC0003DMT400058381	19.13	tetrapyrrole synthesis.divinyl chlorophyllide-a 8-vinyl-reductase	pgsc0003dmp400039308	highly similar to ( 593) AT5G18660 | Symbols: PCB2 | PCB2 (PALE-GREEN AND CHLOROPHYLL B REDUCED 2); 3,8-divinyl protochlorophyllide a 8-vinyl reductase | chr5:6220872-6222125 REVERSEmoderately similar to ( 486) loc_os03g22780 12003.m07676 protein PCB2, putative, expressed PGSC0003DMT400058381
CUST_23491_PI426222305	0.760866	3.87882	1.16518	7.21578	0.727993	3.92141	15.2079	230.84	6.96486	67.3424	2.34546	57.7848	1.33185	10.2952	11.4187	PGSC0003DMT400064960	Aminotransferase	chr08	Gamma aminobutyrate transaminase isoform2	PGSC0003DMP400043798	PGSC0003DMG400025228	PGSC0003DMC400043798	PGSC0003DMT400064960	19.3	tetrapyrrole synthesis.GSA	pgsc0003dmp400043798	moderately similar to ( 370) AT3G22200 | Symbols: POP2, GABA-T, HER1 | POP2 (POLLEN-PISTIL INCOMPATIBILITY 2); 4-aminobutyrate transaminase/ 4-aminobutyrate:pyruvate transaminase | chr3:7835286-7838863 FORWARDmoderately similar to ( 369) loc_os04g52450 12004.m101652 protein aminotransferase y4uB, putative, expressedPRK06105 BioA PRK07480 PRK07036 PRK07482 PRK07483 PRK07481 PRK09221 PRK05965 GabT …
CUST_15023_PI426222305	0.9678	4.44609	1.22813	5.60663	0.925987	4.59001	5.43145	56.3701	3.12634	18.7961	1.97248	16.9234	0.896837	4.71429	6.05624	PGSC0003DMT400056896	Porphobilinogen deaminase	chr07	Porphobilinogen deaminase	PGSC0003DMP400038248	PGSC0003DMG400022126	PGSC0003DMC400038248	PGSC0003DMT400056896	19.5	tetrapyrrole synthesis.porphobilinogen deaminase	pgsc0003dmp400038248	highly similar to ( 529) AT5G08280 | Symbols: HEMC | HEMC (HYDROXYMETHYLBILANE SYNTHASE); hydroxymethylbilane synthase | chr5:2663763-2665596 REVERSEhighly similar to ( 533) HEM3_PEA Porphobilinogen deaminase, chloroplast precursor (EC 2.5.1.61) (PBG) (Hydroxymethylbilane synthase) (HMBS) (Pre-uroporphyrinogen synthase) - Pisum sativum (Garden pea)moderately similar to ( 466) loc_os02g07230 12002…
CUST_49019_PI426222305	1.04072	87.5654	1.06467	83.676	0.840377	74.1342	3.10944	410.022	2.836	267.006	1.20502	127.467	0.86349	80.0236	3.60101	PGSC0003DMT400021854	Chlorophyll synthase	chr09	Chlorophyll synthase	PGSC0003DMP400014884	PGSC0003DMG400008481	PGSC0003DMC400014884	PGSC0003DMT400021854	19.15	tetrapyrrole synthesis.chlorophyll synthase	pgsc0003dmp400014884	highly similar to ( 543) AT3G51820 | Symbols: ATG4, G4, CHLG | G4; chlorophyll synthetase | chr3:19216301-19218934 REVERSEhighly similar to ( 536) loc_os05g28200 12005.m083694 protein bacteriochlorophyll synthase 34 kDa chain, putative, expressedPRK07566 PRK12392 UbiA UbiA ubiA ubiA PRK09573 PGSC0003DMT400021854
CUST_24399_PI426222305	0.891592	38.2758	0.815224	66.3092	0.526552	26.4891	20.3985	1356.57	16.4518	800.145	1.50016	86.0363	0.629337	36.7602	32.4126	PGSC0003DMT400062385	Gamma aminobutyrate transaminase isoform2	chr12	Gamma aminobutyrate transaminase isoform2	PGSC0003DMP400042007	PGSC0003DMG400024281	PGSC0003DMC400042007	PGSC0003DMT400062385	19.3	tetrapyrrole synthesis.GSA	pgsc0003dmp400042007	moderately similar to ( 482) AT3G22200 | Symbols: POP2, GABA-T, HER1 | POP2 (POLLEN-PISTIL INCOMPATIBILITY 2); 4-aminobutyrate transaminase/ 4-aminobutyrate:pyruvate transaminase | chr3:7835286-7838863 FORWARDmoderately similar to ( 477) loc_os04g52450 12004.m101652 protein aminotransferase y4uB, putative, expressedPRK06105 BioA PRK07480 PRK07482 PRK07036 PRK07483 PRK05965 PRK09221 PRK07481 PRK06…
CUST_46022_PI426222305	0.96059	4.35384	1.03919	4.5124	0.925858	4.62283	17.7538	143.393	16.9044	101.429	3.07259	23.2209	0.885675	4.88459	20.0455	PGSC0003DMT400038148	FLU (FLUORESCENT IN BLUE LIGHT); binding	chr06	FLU (FLUORESCENT IN BLUE LIGHT); binding	PGSC0003DMP400025922	PGSC0003DMG400014712	PGSC0003DMC400025922	PGSC0003DMT400038148	19.4	tetrapyrrole synthesis.regulation	pgsc0003dmp400025922	weakly similar to ( 113) AT3G14110 | Symbols: FLU | FLU (FLUORESCENT IN BLUE LIGHT); binding | chr3:4676222-4677602 REVERSEweakly similar to ( 110) loc_os01g32730 12001.m43031 protein FLU, putative, expressed PGSC0003DMT400038148
CUST_38094_PI426222305	0.896054	38.9877	0.923196	37.0583	0.85111	39.7904	4.50997	307.062	4.16212	200.287	1.50714	82.9587	0.758082	35.7866	5.94919	PGSC0003DMT400054789	Uroporphyrinogen decarboxylase	chr10	Uroporphyrinogen decarboxylase	PGSC0003DMP400036852	PGSC0003DMG402021263	PGSC0003DMC400036852	PGSC0003DMT400054789	19.7	tetrapyrrole synthesis.uroporphyrinogen decarboxylase	pgsc0003dmp400036852	moderately similar to ( 422) AT3G14930 | Symbols: HEME1 | HEME1; uroporphyrinogen decarboxylase | chr3:5021290-5022577 FORWARDmoderately similar to ( 256) DCUP_TOBAC Uroporphyrinogen decarboxylase, chloroplast precursor (EC 4.1.1.37) (URO-D) (UPD) - Nicotiana tabacum (Common tobacco)moderately similar to ( 368) loc_os01g43390 12001.m150657 protein uroporphyrinogen decarboxylase, chloroplast precu…
CUST_39604_PI426222305	0.876348	206.077	1.11638	243.659	0.793133	195.879	6.16264	2233.15	6.03135	1580.19	1.6959	494.658	0.759443	195.863	8.11468	PGSC0003DMT400068479	Sulfur	chr10	Sulfur	PGSC0003DMP400046266	PGSC0003DMG400026627	PGSC0003DMC400046266	PGSC0003DMT400068479	19.1	tetrapyrrole synthesis.magnesium chelatase	pgsc0003dmp400046266	moderately similar to ( 247) AT4G18480 | Symbols: CHLI1, CH42, CH-42, CHL11, CHLI-1 | CHLI1; ATPase/ magnesium chelatase | chr4:10201897-10203361 REVERSEmoderately similar to ( 275) CHLI_TOBAC Magnesium-chelatase subunit chlI, chloroplast precursor (EC 6.6.1.1) (Mg-protoporphyrin IX chelatase) - Nicotiana tabacum (Common tobacco)moderately similar to ( 257) loc_os03g36540 12003.m08774 protein mag…
CUST_39657_PI426222305	0.867376	6.70321	0.787699	5.25494	0.712448	5.5813	8.75567	104.591	9.46834	81.1054	1.67931	17.3259	0.81443	6.86174	10.7507	PGSC0003DMT400068480	Sulfur	chr10	Sulfur	PGSC0003DMP400046267	PGSC0003DMG400026627	PGSC0003DMC400046267	PGSC0003DMT400068480	19.1	tetrapyrrole synthesis.magnesium chelatase	pgsc0003dmp400046267	highly similar to ( 566) AT4G18480 | Symbols: CHLI1, CH42, CH-42, CHL11, CHLI-1 | CHLI1; ATPase/ magnesium chelatase | chr4:10201897-10203361 REVERSEhighly similar to ( 662) CHLI_TOBAC Magnesium-chelatase subunit chlI, chloroplast precursor (EC 6.6.1.1) (Mg-protoporphyrin IX chelatase) - Nicotiana tabacum (Common tobacco)highly similar to ( 554) loc_os03g36540 12003.m08774 protein magnesium-chela…
CUST_38204_PI426222305	0.834358	36.9984	0.889273	37.1754	0.816981	38.8226	4.09178	279.541	3.97745	194.338	1.29953	70.0608	0.820909	39.7961	4.98445	PGSC0003DMT400054790	Uroporphyrinogen decarboxylase	chr10	Uroporphyrinogen decarboxylase	PGSC0003DMP400036853	PGSC0003DMG402021263	PGSC0003DMC400036853	PGSC0003DMT400054790	19.7	tetrapyrrole synthesis.uroporphyrinogen decarboxylase	pgsc0003dmp400036853	highly similar to ( 619) AT3G14930 | Symbols: HEME1 | HEME1; uroporphyrinogen decarboxylase | chr3:5021290-5022577 FORWARDmoderately similar to ( 398) DCUP_TOBAC Uroporphyrinogen decarboxylase, chloroplast precursor (EC 4.1.1.37) (URO-D) (UPD) - Nicotiana tabacum (Common tobacco)highly similar to ( 560) loc_os01g43390 12001.m150657 protein uroporphyrinogen decarboxylase, chloroplast precursor, pu…
CUST_23487_PI426222305	1.01689	11.1281	1.06803	10.8014	0.50254	5.22348	9.18023	215.181	6.51386	92.5095	1.84672	70.9908	0.865264	11.7372	10.6097	PGSC0003DMT400064961	Gamma aminobutyrate transaminase isoform2	chr08	Gamma aminobutyrate transaminase isoform2	PGSC0003DMP400043799	PGSC0003DMG400025228	PGSC0003DMC400043799	PGSC0003DMT400064961	19.3	tetrapyrrole synthesis.GSA	pgsc0003dmp400043799	highly similar to ( 718) AT3G22200 | Symbols: POP2, GABA-T, HER1 | POP2 (POLLEN-PISTIL INCOMPATIBILITY 2); 4-aminobutyrate transaminase/ 4-aminobutyrate:pyruvate transaminase | chr3:7835286-7838863 FORWARDvery weakly similar to (94.7) GSA_SOYBN Glutamate-1-semialdehyde 2,1-aminomutase, chloroplast precursor (EC 5.4.3.8) (GSA) (Glutamate-1-semialdehyde aminotransferase) (GSA-AT) - Glycine max (Soy…
CUST_37162_PI426222305	1.12255	62.5328	0.974256	50.6904	1.07681	64.973	3.27712	283.668	3.47459	213.893	1.15351	78.3412	0.833673	49.8314	3.93095	PGSC0003DMT400082448	Glutamate-1-semialdehyde 2,1-aminomutase, chloroplastic	chr04	Glutamate-1-semialdehyde 2,1-aminomutase, chloroplastic	PGSC0003DMP400055597	PGSC0003DMG400032546	PGSC0003DMC400055597	PGSC0003DMT400082448	19.3	tetrapyrrole synthesis.GSA	pgsc0003dmp400055597	highly similar to ( 554) AT5G63570 | Symbols: GSA1 | GSA1 (GLUTAMATE-1-SEMIALDEHYDE-2,1-AMINOMUTASE); glutamate-1-semialdehyde 2,1-aminomutase | chr5:25451957-25453620 FORWARDhighly similar to ( 593) GSA_TOBAC Glutamate-1-semialdehyde 2,1-aminomutase, chloroplast precursor (EC 5.4.3.8) (GSA) (Glutamate-1-semialdehyde aminotransferase) (GSA-AT) - Nicotiana tabacum (Common tobacco)highly similar to…
CUST_6658_PI426222305	0.581714	50.9594	0.92276	76.1695	0.613891	57.0439	7.86741	1053.56	8.52803	828.409	2.4942	264.701	0.631297	59.682	12.4623	PGSC0003DMT400036941	S-adenosyl-L-methionine Mg-protoporphyrin IX methyltranserase	chr03	S-adenosyl-L-methionine Mg-protoporphyrin IX methyltranserase	PGSC0003DMP400025081	PGSC0003DMG400014243	PGSC0003DMC400025081	PGSC0003DMT400036941	19.11	tetrapyrrole synthesis.magnesium protoporphyrin IX methyltransferase	pgsc0003dmp400025081	moderately similar to ( 216) AT4G25080 | Symbols: CHLM | CHLM (magnesium-protoporphyrin IX methyltransferase); magnesium protoporphyrin IX methyltransferase | chr4:12877216-12878128 FORWARDweakly similar to ( 190) loc_os06g04150 12006.m05146 protein magnesium-protoporphyrin O-methyltransferase, putative, expressedPRK07580 Mg-por_mtran_C PGSC0003DMT400036941
CUST_6606_PI426222305	0.449314	10.2329	0.636098	13.9208	0.430884	10.0485	6.44189	226.716	6.13967	150.938	2.22137	74.5548	0.378979	9.49981	16.998	PGSC0003DMT400036942	S-adenosyl-L-methionine Mg-protoporphyrin IX methyltranserase	chr03	S-adenosyl-L-methionine Mg-protoporphyrin IX methyltranserase	PGSC0003DMP400025082	PGSC0003DMG400014243	PGSC0003DMC400025082	PGSC0003DMT400036942	19.11	tetrapyrrole synthesis.magnesium protoporphyrin IX methyltransferase	pgsc0003dmp400025082	moderately similar to ( 406) AT4G25080 | Symbols: CHLM | CHLM (magnesium-protoporphyrin IX methyltransferase); magnesium protoporphyrin IX methyltransferase | chr4:12877216-12878128 FORWARDmoderately similar to ( 303) loc_os06g04150 12006.m05146 protein magnesium-protoporphyrin O-methyltransferase, putative, expressedPRK07580 Mg-por_mtran_C UbiG PGSC0003DMT400036942
CUST_46457_PI426222305	0.678946	18.819	0.873067	23.4562	0.414571	12.1548	6.31289	278.272	8.32499	259.709	2.52247	85.9902	0.619448	18.9596	10.1912	PGSC0003DMT400016326	Glutamyl-tRNA reductase	chr04	Glutamyl-tRNA reductase	PGSC0003DMP400011315	PGSC0003DMG400006381	PGSC0003DMC400011315	PGSC0003DMT400016326	19.2	tetrapyrrole synthesis.glu-tRNA reductase	pgsc0003dmp400011315	highly similar to ( 723) AT1G58290 | Symbols: HEMA1 | HEMA1; glutamyl-tRNA reductase | chr1:21624028-21626051 REVERSEhighly similar to ( 793) HEM11_CUCSA Glutamyl-tRNA reductase 1, chloroplast precursor (EC 1.2.1.70) (GluTR) - Cucumis sativus (Cucumber)highly similar to ( 612) loc_os10g35840 12010.m06402 protein glutamyl-tRNA reductase, chloroplast precursor, putative, expressedhemA HemA GlutR_N …
CUST_43326_PI426222305	0.894103	522.04	1.08821	605.556	0.619715	391.956	4.1668	3743.55	6.18603	4004.43	1.96866	1411.7	0.682344	433.442	6.1066	PGSC0003DMT400064369	NADPH:protochlorophyllide oxidoreductase	chr10	NADPH:protochlorophyllide oxidoreductase	PGSC0003DMP400043401	PGSC0003DMG400025007	PGSC0003DMC400043401	PGSC0003DMT400064369	19.14	tetrapyrrole synthesis.protochlorophyllide reductase	pgsc0003dmp400043401	highly similar to ( 613) AT5G54190 | Symbols: PORA | PORA; oxidoreductase/ protochlorophyllide reductase | chr5:21991183-21992238 REVERSEhighly similar to ( 625) POR_DAUCA Protochlorophyllide reductase, chloroplast precursor (EC 1.3.1.33) (PCR) (NADPH-protochlorophyllide oxidoreductase) (POR) - Daucus carota (Carrot)highly similar to ( 561) loc_os10g35370 12010.m06361 protein protochlorophyllide …
CUST_21503_PI426222305	0.77711	7.38319	1.49699	15.6719	0.641398	6.29838	7.40423	122.266	6.70324	73.8138	4.26356	65.224	0.641466	6.73405	11.5427	PGSC0003DMT400070176	Mg protoporphyrin IX chelatase	chr04	Mg protoporphyrin IX chelatase	PGSC0003DMP400047446	PGSC0003DMG400027276	PGSC0003DMC400047446	PGSC0003DMT400070176	19.1	tetrapyrrole synthesis.magnesium chelatase	pgsc0003dmp400047446	nearly identical (2415) AT5G13630 | Symbols: GUN5, CCH, CHLH, CCH1 | GUN5 (GENOMES UNCOUPLED 5); magnesium chelatase | chr5:4387920-4392082 REVERSEnearly identical (2338) loc_os03g20700 12003.m34853 protein Mg-chelatase subunit XANTHA-F, putative, expressedPRK12493 CobN-Mg_chel CobN cobN cobN PGSC0003DMT400070176
CUST_16514_PI426222305	0.742461	45.3862	1.3586	78.2936	0.223582	16.5762	14.1691	1305.48	15.4315	1007.82	5.03051	412.358	0.396448	25.6721	35.7401	PGSC0003DMT400069485	Tetrapyrrole-binding protein, chloroplast	chr06	Tetrapyrrole-binding protein, chloroplast	PGSC0003DMP400046904	PGSC0003DMG400027013	PGSC0003DMC400046904	PGSC0003DMT400069485	19.4	tetrapyrrole synthesis.regulation	pgsc0003dmp400046904	moderately similar to ( 226) AT3G59400 | Symbols: GUN4 | GUN4; enzyme binding / tetrapyrrole binding | chr3:21948881-21949678 REVERSEmoderately similar to ( 205) loc_os11g16550 12011.m05740 protein expressed proteinGUN4 PGSC0003DMT400069485
CUST_36069_PI426222305	0.802031	10.195	1.07912	12.115	0.737906	9.78159	4.20993	93.3648	2.6849	35.7972	2.02129	41.6945	0.450029	5.82027	9.3548	PGSC0003DMT400058543	Acetylornithine aminotransferase, mitochondrial	chr08	Acetylornithine aminotransferase, mitochondrial	PGSC0003DMP400039427	PGSC0003DMG400022742	PGSC0003DMC400039427	PGSC0003DMT400058543	19.3	tetrapyrrole synthesis.GSA	pgsc0003dmp400039427	highly similar to ( 643) AT1G80600 | Symbols: WIN1 | WIN1 (HOPW1-1-INTERACTING 1); N2-acetyl-L-ornithine:2-oxoglutarate 5-aminotransferase/ catalytic/ pyridoxal phosphate binding / transaminase | chr1:30298675-30300513 REVERSEweakly similar to ( 120) GSA_BRANA Glutamate-1-semialdehyde 2,1-aminomutase, chloroplast precursor (EC 5.4.3.8) (GSA) (Glutamate-1-semialdehyde aminotransferase) (GSA-AT) - …
CUST_32757_PI426222305	0.576855	10.1828	0.86415	14.0055	0.562912	10.5525	9.14598	285.498	5.56534	103.403	2.73428	80.3063	0.406677	7.36742	22.4895	PGSC0003DMT400047263	NADPH:protochlorophyllide oxidoreductase	chr01	NADPH:protochlorophyllide oxidoreductase	PGSC0003DMP400031982	PGSC0003DMG400018351	PGSC0003DMC400031982	PGSC0003DMT400047263	19.14	tetrapyrrole synthesis.protochlorophyllide reductase	pgsc0003dmp400031982	moderately similar to ( 461) AT4G27440 | Symbols: PORB | PORB (PROTOCHLOROPHYLLIDE OXIDOREDUCTASE B); oxidoreductase/ protochlorophyllide reductase | chr4:13725648-13727107 FORWARDmoderately similar to ( 464) POR_PEA Protochlorophyllide reductase, chloroplast precursor (EC 1.3.1.33) (PCR) (NADPH-protochlorophyllide oxidoreductase) (POR) - Pisum sativum (Garden pea)moderately similar to ( 437) loc…
CUST_32703_PI426222305	0.569944	8.39088	0.775011	10.5059	0.591115	9.4172	9.92663	301.921	6.11648	99.8264	3.89104	112.741	0.34964	5.42788	28.391	PGSC0003DMT400047264	NADPH:protochlorophyllide oxidoreductase	chr01	NADPH:protochlorophyllide oxidoreductase	PGSC0003DMP400031983	PGSC0003DMG400018351	PGSC0003DMC400031983	PGSC0003DMT400047264	19.14	tetrapyrrole synthesis.protochlorophyllide reductase	pgsc0003dmp400031983	highly similar to ( 533) AT5G54190 | Symbols: PORA | PORA; oxidoreductase/ protochlorophyllide reductase | chr5:21991183-21992238 REVERSEhighly similar to ( 554) POR_PEA Protochlorophyllide reductase, chloroplast precursor (EC 1.3.1.33) (PCR) (NADPH-protochlorophyllide oxidoreductase) (POR) - Pisum sativum (Garden pea)moderately similar to ( 500) loc_os10g35370 12010.m06361 protein protochlorophy…
CUST_46087_PI426222305	1.12615	69.2697	1.22029	76.0085	0.3672	23.3753	9.16418	857.025	10.7418	729.549	3.30095	248.623	0.147076	10.0721	62.3092	PGSC0003DMT400018519	Desaturase	chr10	Desaturase	PGSC0003DMP400012744	PGSC0003DMG400007188	PGSC0003DMC400012744	PGSC0003DMT400018519	19.12	tetrapyrrole synthesis.magnesium-protoporphyrin IX monomethyl ester (oxidative) cyclase	pgsc0003dmp400012744	highly similar to ( 625) AT3G56940 | Symbols: CRD1, CHL27, ACSF | CRD1 (COPPER RESPONSE DEFECT 1); DNA binding / magnesium-protoporphyrin IX monomethyl ester (oxidative) cyclase | chr3:21076594-21078269 FORWARDhighly similar to ( 630) CRD1_GOSHI Magnesium-protoporphyrin IX monomethyl ester [oxidative] cyclase, chloroplast precursor (EC 1.14.13.81) (Mg-protoporphyrin IX monomethyl ester oxidative …
CUST_18078_PI426222305	0.748026	56.5605	1.38785	89.6898	0.211497	15.7657	12.368	1335.01	8.39111	679.479	1.6539	149.474	0.131149	11.3124	94.3055	PGSC0003DMT400071039	Heme-binding protein	chr07	Heme-binding protein	PGSC0003DMP400048035	PGSC0003DMG400027630	PGSC0003DMC400048035	PGSC0003DMT400071039	19.99	tetrapyrrole synthesis.unspecified	pgsc0003dmp400048035	weakly similar to ( 147) AT1G17100 | Symbols: | SOUL heme-binding family protein | chr1:5844766-5845539 FORWARDweakly similar to ( 157) loc_os01g11230 12001.m150508 protein heme-binding protein 2, putative, expressedSOUL PGSC0003DMT400071039
CUST_34786_PI426222305	0.687443	34.4897	0.824989	30.0385	0.613819	27.1027	2.23404	199.947	1.64821	76.736	1.4082	94.0753	1.03667	47.4993	2.15501	PGSC0003DMT400009700	FLU	chr09	FLU	PGSC0003DMP400006761	PGSC0003DMG400003792	PGSC0003DMC400006761	PGSC0003DMT400009700	19.4	tetrapyrrole synthesis.regulation	pgsc0003dmp400006761	moderately similar to ( 290) AT3G14110 | Symbols: FLU | FLU (FLUORESCENT IN BLUE LIGHT); binding | chr3:4676222-4677602 REVERSEmoderately similar to ( 274) loc_os01g32730 12001.m43031 protein FLU, putative, expressed PGSC0003DMT400009700
CUST_29620_PI426222305	0.9303	147.337	1.19075	175.979	0.966676	160.246	1.91458	468.7	1.82192	322.527	0.812783	166.661	0.881727	152.498	2.17139	PGSC0003DMT400075960	Delta-aminolevulinic acid dehydratase	chr08	Delta-aminolevulinic acid dehydratase	PGSC0003DMP400051438	PGSC0003DMG400029545	PGSC0003DMC400051438	PGSC0003DMT400075960	19.4	tetrapyrrole synthesis.ALA dehydratase	pgsc0003dmp400051438	highly similar to ( 625) AT1G69740 | Symbols: HEMB1 | HEMB1; catalytic/ metal ion binding / porphobilinogen synthase | chr1:26232197-26234713 FORWARDhighly similar to ( 605) HEM2_PEA Delta-aminolevulinic acid dehydratase, chloroplast precursor (EC 4.2.1.24) (Porphobilinogen synthase) (ALADH) (Fragment) - Pisum sativum (Garden pea)highly similar to ( 561) loc_os06g49110 12006.m32176 protein delta-…
CUST_25699_PI426222305	0.751552	13.7066	0.987897	15.6566	0.555771	9.9408	1.64542	42.0066	2.40011	43.6153	0.670352	14.1843	0.911715	16.7335	1.80475	PGSC0003DMT400029316	Coproporphyrinogen-III oxidase, chloroplastic	chr10	Coproporphyrinogen-III oxidase, chloroplastic	PGSC0003DMP400019951	PGSC0003DMG400011264	PGSC0003DMC400019951	PGSC0003DMT400029316	19.8	tetrapyrrole synthesis.coproporphyrinogen III oxidase	pgsc0003dmp400019951	highly similar to ( 596) AT1G03475 | Symbols: LIN2, HEMF1, ATCPO-I | LIN2 (LESION INITIATION 2); coproporphyrinogen oxidase | chr1:869302-871175 REVERSEhighly similar to ( 599) HEM6_TOBAC Coproporphyrinogen III oxidase, chloroplast precursor (EC 1.3.3.3) (Coproporphyrinogenase) (Coprogen oxidase) - Nicotiana tabacum (Common tobacco)highly similar to ( 568) loc_os04g52130 12004.m101648 protein cop…
CUST_7875_PI426222305	0.633236	16.6575	1.20678	32.5339	0.639232	21.2046	2.41209	176.008	1.29738	38.5006	1.51017	64.5184	0.577788	17.9131	4.17469	PGSC0003DMT400009615	Uroporphyrin-III methyltransferase	chr04	Uroporphyrin-III methyltransferase	PGSC0003DMP400006700	PGSC0003DMG400003752	PGSC0003DMC400006700	PGSC0003DMT400009615	19	tetrapyrrole synthesis	pgsc0003dmp400006700	weakly similar to ( 172) AT1G45110 | Symbols: | tetrapyrrole methylase family protein | chr1:17052572-17054546 FORWARDweakly similar to ( 153) loc_os10g27450 12010.m21887 protein expressed proteinCOG0313 TP_methylase PGSC0003DMT400009615
CUST_31335_PI426222305	0.655586	6.1654	2.02867	20.0394	0.847808	9.67452	4.18873	266	1.63655	18.2824	2.48267	148.801	0.671402	7.7344	6.23877	PGSC0003DMT400034934	Protoporphyrinogen oxidase, mitochondrial	chr03	Protoporphyrinogen oxidase, mitochondrial	PGSC0003DMP400023768	PGSC0003DMG400013429	PGSC0003DMC400023768	PGSC0003DMT400034934	19.9	tetrapyrrole synthesis.protoporphyrin IX oxidase	pgsc0003dmp400023768	moderately similar to ( 411) AT5G14220 | Symbols: HEMG2, MEE61, PPO2 | HEMG2; electron carrier/ oxidoreductase/ protoporphyrinogen oxidase | chr5:4583506-4587369 REVERSEhighly similar to ( 607) PPOM_TOBAC Protoporphyrinogen oxidase, mitochondrial (EC 1.3.3.4) (PPO II) (Protoporphyrinogen IX oxidase isozyme II) (PPX II) (PX-2) - Nicotiana tabacum (Common tobacco)moderately similar to ( 355) loc_os…
CUST_31265_PI426222305	0.648351	8.36889	1.10654	13.5702	0.603759	8.00129	4.3675	312.59	1.64386	21.1251	2.26191	107.183	0.553746	7.24461	7.88719	PGSC0003DMT400034935	Protoporphyrinogen oxidase, mitochondrial	chr03	Protoporphyrinogen oxidase, mitochondrial	PGSC0003DMP400023769	PGSC0003DMG400013429	PGSC0003DMC400023769	PGSC0003DMT400034935	19.9	tetrapyrrole synthesis.protoporphyrin IX oxidase	pgsc0003dmp400023769	highly similar to ( 659) AT5G14220 | Symbols: HEMG2, MEE61, PPO2 | HEMG2; electron carrier/ oxidoreductase/ protoporphyrinogen oxidase | chr5:4583506-4587369 REVERSEhighly similar to ( 955) PPOM_TOBAC Protoporphyrinogen oxidase, mitochondrial (EC 1.3.3.4) (PPO II) (Protoporphyrinogen IX oxidase isozyme II) (PPX II) (PX-2) - Nicotiana tabacum (Common tobacco)highly similar to ( 578) loc_os04g41260…
CUST_29065_PI426222305	0.924956	9.31423	1.76632	16.793	0.911227	9.10498	5.84387	262.59	1.5342	16.6316	1.89599	115.902	0.564339	5.69766	10.3552	PGSC0003DMT400020615	Heme oxygenase 2	chr04	Heme oxygenase 2	PGSC0003DMP400014047	PGSC0003DMG400007989	PGSC0003DMC400014047	PGSC0003DMT400020615	19.21	tetrapyrrole synthesis.heme oxygenase	pgsc0003dmp400014047	moderately similar to ( 215) AT2G26550 | Symbols: HO2 | HO2 (HEME OXYGENASE 2); heme oxygenase (decyclizing) | chr2:11291584-11293426 REVERSEmoderately similar to ( 224) loc_os03g27770 12003.m35265 protein heme oxygenase 2, putative, expressedHemeO PGSC0003DMT400020615
CUST_37115_PI426222305	0.873695	23.987	1.27774	32.5264	0.686474	20.265	2.54137	163.295	1.56711	47.4787	1.19893	56.7734	0.722476	21.0324	3.51759	PGSC0003DMT400082447	Glutamate-1-semialdehyde 2,1-aminomutase, chloroplastic	chr04	Glutamate-1-semialdehyde 2,1-aminomutase, chloroplastic	PGSC0003DMP400055596	PGSC0003DMG400032546	PGSC0003DMC400055596	PGSC0003DMT400082447	19.3	tetrapyrrole synthesis.GSA	pgsc0003dmp400055596	highly similar to ( 702) AT5G63570 | Symbols: GSA1 | GSA1 (GLUTAMATE-1-SEMIALDEHYDE-2,1-AMINOMUTASE); glutamate-1-semialdehyde 2,1-aminomutase | chr5:25451957-25453620 FORWARDhighly similar to ( 802) GSA_TOBAC Glutamate-1-semialdehyde 2,1-aminomutase, chloroplast precursor (EC 5.4.3.8) (GSA) (Glutamate-1-semialdehyde aminotransferase) (GSA-AT) - Nicotiana tabacum (Common tobacco)highly similar to…
CUST_7840_PI426222305	0.481229	11.4091	0.976099	19.5569	1.05925	25.7495	2.21747	130.688	1.21968	30.2177	1.74903	74.6883	0.258411	5.88978	8.58115	PGSC0003DMT400009614	Uroporphyrin-III methyltransferase	chr04	Uroporphyrin-III methyltransferase	PGSC0003DMP400006699	PGSC0003DMG400003752	PGSC0003DMC400006699	PGSC0003DMT400009614	19	tetrapyrrole synthesis	pgsc0003dmp400006699	weakly similar to ( 130) AT1G45110 | Symbols: | tetrapyrrole methylase family protein | chr1:17052572-17054546 FORWARDweakly similar to ( 112) loc_os10g27450 12010.m21887 protein expressed proteinCOG0313 PGSC0003DMT400009614
CUST_13151_PI426222305	0.552602	16.54	1.16366	29.7082	1.28539	36.9518	2.85844	183.993	1.5309	45.2224	1.43319	67.0169	0.524573	16.4236	5.44908	PGSC0003DMT400007497	Heme oxygenase 1	chr01	Heme oxygenase 1	PGSC0003DMP400005213	PGSC0003DMG400002891	PGSC0003DMC400005213	PGSC0003DMT400007497	19.21	tetrapyrrole synthesis.heme oxygenase	pgsc0003dmp400005213	moderately similar to ( 362) AT2G26670 | Symbols: ATHO1, HO1, TED4, GUN2, HY6 | TED4 (REVERSAL OF THE DET PHENOTYPE 4); heme oxygenase (decyclizing) | chr2:11341816-11343394 FORWARDmoderately similar to ( 332) loc_os06g40080 12006.m08545 protein heme oxygenase 1, putative, expressedHemeO PGSC0003DMT400007497
CUST_7688_PI426222305	0.575331	17.1732	1.20744	30.8378	0.943327	26.4876	2.15108	322.938	1.14261	34.5413	2.23824	165.095	0.661009	20.7043	3.25423	PGSC0003DMT400009616	Uroporphyrin-III methyltransferase	chr04	Uroporphyrin-III methyltransferase	PGSC0003DMP400006701	PGSC0003DMG400003752	PGSC0003DMC400006701	PGSC0003DMT400009616	19	tetrapyrrole synthesis	pgsc0003dmp400006701	moderately similar to ( 424) AT1G45110 | Symbols: | tetrapyrrole methylase family protein | chr1:17052572-17054546 FORWARDmoderately similar to ( 377) loc_os10g27450 12010.m21887 protein expressed proteinCOG0313 TP_methylase PGSC0003DMT400009616
CUST_38165_PI426222305	0.921669	3.86247	1.44611	7.99254	1.11062	6.17257	2.38128	46.2124	1.38327	8.56824	2.232	31.1782	0.849789	4.28262	2.80221	PGSC0003DMT400054703	Glutamyl-tRNA(Gln) amidotransferase subunit A	chr10	Glutamyl-tRNA(Gln) amidotransferase subunit A	PGSC0003DMP400036793	PGSC0003DMG402021239	PGSC0003DMC400036793	PGSC0003DMT400054703	19.1	tetrapyrrole synthesis.glu-tRNA synthetase	pgsc0003dmp400036793	moderately similar to ( 229) AT3G25660 | Symbols: | glutamyl-tRNA(Gln) amidotransferase, putative | chr3:9339640-9342044 REVERSEweakly similar to ( 172) loc_os04g55050 12004.m101672 protein glutamyl-tRNA, putative, expressedgatA GatA Amidase PGSC0003DMT400054703
CUST_7468_PI426222305	0.4735	11.9943	1.16431	28.3101	0.970387	27.7542	2.47341	148.278	1.30467	37.2566	1.84319	75.2331	0.600513	19.4518	4.11883	PGSC0003DMT400009613	Uroporphyrin-III methyltransferase	chr04	Uroporphyrin-III methyltransferase	PGSC0003DMP400006698	PGSC0003DMG400003752	PGSC0003DMC400006698	PGSC0003DMT400009613	19	tetrapyrrole synthesis	pgsc0003dmp400006698	weakly similar to ( 111) AT1G45110 | Symbols: | tetrapyrrole methylase family protein | chr1:17052572-17054546 FORWARDvery weakly similar to (96.7) loc_os10g27450 12010.m21887 protein expressed proteinCOG0313 PGSC0003DMT400009613
CUST_43371_PI426222305	0.749099	19.0802	1.02103	23.3012	0.957629	25.4675	1.40878	71.9046	0.983174	26.985	1.23344	42.1036	0.865572	23.9659	1.62757	PGSC0003DMT400033003	Nadph-cytochrome P450 oxydoreductase	chr02	Nadph-cytochrome P450 oxydoreductase	PGSC0003DMP400022454	PGSC0003DMG400012672	PGSC0003DMC400022454	PGSC0003DMT400033003	19.99	tetrapyrrole synthesis.unspecified	pgsc0003dmp400022454	highly similar to ( 803) AT3G02280 | Symbols: | flavodoxin family protein | chr3:453646-457659 FORWARDmoderately similar to ( 228) NCPR_CATRO NADPH--cytochrome P450 reductase (EC 1.6.2.4) (CPR) (P450R) - Catharanthus roseus (Rosy periwinkle) (Madagascar periwinkle)highly similar to ( 733) loc_os01g53250 12001.m11494 protein NADPH reductase TAH18, putative, expressedCysJ cysJ PRK06214 FAD_binding_…
CUST_7743_PI426222305	0.854099	21.2818	1.18654	27.3336	0.922754	23.8528	2.25902	272.786	0.969474	26.8283	2.74374	130.657	0.81382	22.1598	2.77582	PGSC0003DMT400009617	Uroporphyrin-III methyltransferase	chr04	Uroporphyrin-III methyltransferase	PGSC0003DMP400006702	PGSC0003DMG400003752	PGSC0003DMC400006702	PGSC0003DMT400009617	19	tetrapyrrole synthesis	pgsc0003dmp400006702	moderately similar to ( 293) AT1G45110 | Symbols: | tetrapyrrole methylase family protein | chr1:17052572-17054546 FORWARDmoderately similar to ( 254) loc_os10g27450 12010.m21887 protein expressed proteinCOG0313 TP_methylase PGSC0003DMT400009617
CUST_7605_PI426222305	0.962982	21.315	1.23875	27.3706	0.918901	21.4055	2.42181	265.226	0.964598	24.6167	2.74336	132.227	0.656985	16.5872	3.68625	PGSC0003DMT400009618	Uroporphyrin-III methyltransferase	chr04	Uroporphyrin-III methyltransferase	PGSC0003DMP400006703	PGSC0003DMG400003752	PGSC0003DMC400006703	PGSC0003DMT400009618	19	tetrapyrrole synthesis	pgsc0003dmp400006703	moderately similar to ( 256) AT1G45110 | Symbols: | tetrapyrrole methylase family protein | chr1:17052572-17054546 FORWARDmoderately similar to ( 233) loc_os10g27450 12010.m21887 protein expressed proteinCOG0313 PGSC0003DMT400009618
CUST_44723_PI426222305	1.02541	4.77267	1.774	9.1735	1.00131	4.95593	2.99693	164.445	0.917235	5.03836	3.30442	110.743	0.976025	5.12018	3.07054	PGSC0003DMT400045301	Chlorophyll synthase	chr06	Chlorophyll synthase	PGSC0003DMP400030695	PGSC0003DMG400017570	PGSC0003DMC400030695	PGSC0003DMT400045301	19.16	tetrapyrrole synthesis.chlorophyll b synthase	pgsc0003dmp400030695	moderately similar to ( 287) AT1G44446 | Symbols: CH1, ATCAO, CAO | CH1 (CHLORINA 1); chlorophyllide a oxygenase | chr1:16849132-16851152 REVERSEmoderately similar to ( 258) CAO_ORYSA Chlorophyllide a oxygenase, chloroplast precursor (EC 1.13.12.14) (Chlorophyll a oxygenase) (Chlorophyll b synthase) - Oryza sativa (Rice)moderately similar to ( 259) loc_os10g41780 12010.m21805 protein chlorophylli…
CUST_30008_PI426222305	1.0404	4.65486	1.38788	6.4378	1.01207	4.73023	2.07298	51.6527	0.956851	4.88991	2.32262	37.1466	0.97358	5.07549	2.12923	PGSC0003DMT400005612	Ferrochelatase	chr08	Ferrochelatase	PGSC0003DMP400003926	PGSC0003DMG400002201	PGSC0003DMC400003926	PGSC0003DMT400005612	19.2	tetrapyrrole synthesis.ferrochelatase	pgsc0003dmp400003926	moderately similar to ( 435) AT5G26030 | Symbols: FC1, FC-I, ATFC-I | FC1 (ferrochelatase 1); ferrochelatase | chr5:9096675-9098752 FORWARDmoderately similar to ( 476) HEMH_CUCSA Ferrochelatase-2, chloroplast precursor (EC 4.99.1.1) (Ferrochelatase II) (Protoheme ferro-lyase 2) (Heme synthetase 2) - Cucumis sativus (Cucumber)moderately similar to ( 441) loc_os09g12560 12009.m059951 protein ferroc…
CUST_24298_PI426222305	1.01844	4.56771	1.46985	7.09845	1.02329	5.25308	2.23984	68.3024	0.938946	4.9819	2.64324	53.304	1.01881	5.42675	2.19849	PGSC0003DMT400062373	Gamma aminobutyrate transaminase isoform3	chr12	Gamma aminobutyrate transaminase isoform3	PGSC0003DMP400042000	PGSC0003DMG400024275	PGSC0003DMC400042000	PGSC0003DMT400062373	19.3	tetrapyrrole synthesis.GSA	pgsc0003dmp400042000	highly similar to ( 617) AT3G22200 | Symbols: POP2, GABA-T, HER1 | POP2 (POLLEN-PISTIL INCOMPATIBILITY 2); 4-aminobutyrate transaminase/ 4-aminobutyrate:pyruvate transaminase | chr3:7835286-7838863 FORWARDhighly similar to ( 635) loc_os08g10510 12008.m080107 protein aminotransferase y4uB, putative, expressedPRK06105 BioA PRK07482 PRK07480 PRK07036 PRK06541 PRK07481 PRK12403 PRK05965 PRK07483 PRK0…
CUST_44697_PI426222305	1.01844	4.02575	1.504	7.31095	0.974441	4.11497	3.08738	144.105	0.913029	4.37095	3.18032	95.9365	0.988128	4.94628	3.12447	PGSC0003DMT400045300	Chlorophyll synthase	chr06	Chlorophyll synthase	PGSC0003DMP400030694	PGSC0003DMG400017570	PGSC0003DMC400030694	PGSC0003DMT400045300	19.16	tetrapyrrole synthesis.chlorophyll b synthase	pgsc0003dmp400030694	moderately similar to ( 392) AT1G44446 | Symbols: CH1, ATCAO, CAO | CH1 (CHLORINA 1); chlorophyllide a oxygenase | chr1:16849132-16851152 REVERSEmoderately similar to ( 362) CAO_ORYSA Chlorophyllide a oxygenase, chloroplast precursor (EC 1.13.12.14) (Chlorophyll a oxygenase) (Chlorophyll b synthase) - Oryza sativa (Rice)moderately similar to ( 362) loc_os10g41780 12010.m21805 protein chlorophylli…
CUST_44038_PI426222305	1.04032	3.90836	1.12544	4.09749	0.995373	4.03864	1.65351	27.2303	0.932642	4.14303	1.99987	24.4022	0.959186	4.32595	1.72386	PGSC0003DMT400016517	Chlorophyllase	chr09	Chlorophyllase	PGSC0003DMP400011449	PGSC0003DMG400006452	PGSC0003DMC400011449	PGSC0003DMT400016517	19.99	tetrapyrrole synthesis.unspecified	pgsc0003dmp400011449	weakly similar to ( 176) AT5G43860 | Symbols: ATCLH2, CLH2 | ATCLH2; chlorophyllase | chr5:17630492-17632184 FORWARDweakly similar to ( 101) CLH1_CITSI Chlorophyllase-1, chloroplast precursor (EC 3.1.1.14) (Chlorophyll-chlorophyllido hydrolase 1) (Chlase 1) - Citrus sinensis (Sweet orange)weakly similar to ( 130) loc_os10g28370 12010.m05717 protein chlorophyllase-2, chloroplast precursor, putativ…
CUST_17963_PI426222305	1.02298	5.02668	1.1458	5.1747	1.00351	5.09497	1.74269	35.7345	0.936851	5.24387	1.99713	26.1173	0.993621	5.41121	1.75388	PGSC0003DMT400071037	Heme-binding protein	chr07	Heme-binding protein	PGSC0003DMP400048033	PGSC0003DMG400027630	PGSC0003DMC400048033	PGSC0003DMT400071037	19.99	tetrapyrrole synthesis.unspecified	pgsc0003dmp400048033	moderately similar to ( 249) AT1G17100 | Symbols: | SOUL heme-binding family protein | chr1:5844766-5845539 FORWARDmoderately similar to ( 250) loc_os01g11230 12001.m150508 protein heme-binding protein 2, putative, expressedSOUL PGSC0003DMT400071037
CUST_22047_PI426222305	1.01938	4.32608	1.40571	6.61885	1.18444	6.22142	2.61725	106.781	0.913867	4.75648	3.32518	61.1493	0.972163	5.1108	2.69219	PGSC0003DMT400041940	Chlorophyllase		Chlorophyllase	PGSC0003DMP400028421	PGSC0003DMG400016268	PGSC0003DMC400028421	PGSC0003DMT400041940	19.99	tetrapyrrole synthesis.unspecified	pgsc0003dmp400028421	very weakly similar to (83.2) AT5G43860 | Symbols: ATCLH2, CLH2 | ATCLH2; chlorophyllase | chr5:17630492-17632184 FORWARDvery weakly similar to (87.0) loc_os10g28370 12010.m05717 protein chlorophyllase-2, chloroplast precursor, putative, expressedChlorophyllase PGSC0003DMT400041940
CUST_5381_PI426222305	1.16208	6.03619	1.18534	5.68178	0.986517	5.32881	2.24825	80.2959	0.920447	5.25063	2.39418	48.6903	1.0904	6.10989	2.06186	PGSC0003DMT400003951	Aspartyl/glutamyl-tRNA(Asn/Gln) amidotransferase subunit B	chr02	Aspartyl/glutamyl-tRNA(Asn/Gln) amidotransferase subunit B	PGSC0003DMP400002817	PGSC0003DMG400001555	PGSC0003DMC400002817	PGSC0003DMT400003951	19.1	tetrapyrrole synthesis.glu-tRNA synthetase	pgsc0003dmp400002817	highly similar to ( 741) AT1G48520 | Symbols: GATB | GATB (GLU-ADT SUBUNIT B); carbon-nitrogen ligase, with glutamine as amido-N-donor / glutaminyl-tRNA synthase (glutamine-hydrolyzing)/ ligase | chr1:17940185-17942540 FORWARDhighly similar to ( 720) loc_os11g34210 12011.m080020 protein aspartyl/glutamyl-tRNA amidotransferase subunit B, putative, expressedgatB GatB GatB_N GatB_Yqey PRK04028 GatE …
CUST_48644_PI426222305	1.02543	5.05113	1.13203	4.96476	1.00646	4.97668	2.45667	91.4398	1.00416	5.56166	2.72825	59.9178	0.980677	5.26249	2.50508	PGSC0003DMT400065013	S-adenosyl-L-methionine-dependent uroporphyrinogen III methyltransferase	chr01	S-adenosyl-L-methionine-dependent uroporphyrinogen III methyltransferase	PGSC0003DMP400043832	PGSC0003DMG400025254	PGSC0003DMC400043832	PGSC0003DMT400065013	19.3	tetrapyrrole synthesis.uroporphyrin-III C-methyltransferase	pgsc0003dmp400043832	highly similar to ( 513) AT5G40850 | Symbols: UPM1 | UPM1 (UROPHORPHYRIN METHYLASE 1); uroporphyrin-III C-methyltransferase | chr5:16367205-16368724 FORWARDmoderately similar to ( 236) loc_os01g44050 12001.m10664 protein siroheme synthase, putative, expressedPRK06136 CysG cysG TP_methylase PRK07168 CobM CobF CobJ PRK05990 PGSC0003DMT400065013
CUST_24337_PI426222305	1.03299	4.17251	1.11751	4.18267	0.988359	4.15906	2.48285	64.933	0.926071	4.46252	2.48663	45.4628	0.952427	4.55574	2.60686	PGSC0003DMT400062370	Gamma aminobutyrate transaminase isoform3	chr12	Gamma aminobutyrate transaminase isoform3	PGSC0003DMP400041997	PGSC0003DMG400024275	PGSC0003DMC400041997	PGSC0003DMT400062370	19.3	tetrapyrrole synthesis.GSA	pgsc0003dmp400041997	highly similar to ( 571) AT3G22200 | Symbols: POP2, GABA-T, HER1 | POP2 (POLLEN-PISTIL INCOMPATIBILITY 2); 4-aminobutyrate transaminase/ 4-aminobutyrate:pyruvate transaminase | chr3:7835286-7838863 FORWARDhighly similar to ( 590) loc_os08g10510 12008.m080107 protein aminotransferase y4uB, putative, expressedPRK06105 PRK07482 BioA PRK07480 PRK07036 PRK06541 PRK07481 PRK12403 PRK07483 PRK05965 GabT…
CUST_23727_PI426222305	1.11023	5.00142	1.11751	4.48	0.988359	4.20939	2.1694	59.7024	0.926071	4.47595	2.22691	32.298	0.952427	4.61789	2.27776	PGSC0003DMT400002345	Chlorophyll synthase	chr11	Chlorophyll synthase	PGSC0003DMP400001698	PGSC0003DMG402000895	PGSC0003DMC400001698	PGSC0003DMT400002345	19.16	tetrapyrrole synthesis.chlorophyll b synthase	pgsc0003dmp400001698	highly similar to ( 792) AT1G44446 | Symbols: CH1, ATCAO, CAO | CH1 (CHLORINA 1); chlorophyllide a oxygenase | chr1:16849132-16851152 REVERSEhighly similar to ( 773) CAO_ORYSA Chlorophyllide a oxygenase, chloroplast precursor (EC 1.13.12.14) (Chlorophyll a oxygenase) (Chlorophyll b synthase) - Oryza sativa (Rice)highly similar to ( 774) loc_os10g41780 12010.m21805 protein chlorophyllide a oxygena…
CUST_33778_PI426222305	1.03299	4.23951	1.24202	5.39697	1.11428	5.29613	2.95284	146.295	0.926071	4.54394	2.96748	75.5606	0.952427	4.70983	3.10033	PGSC0003DMT400070974	Uroporphyrinogen decarboxylase, chloroplastic	chr06	Uroporphyrinogen decarboxylase, chloroplastic	PGSC0003DMP400048000	PGSC0003DMG400027602	PGSC0003DMC400048000	PGSC0003DMT400070974	19.7	tetrapyrrole synthesis.uroporphyrinogen decarboxylase	pgsc0003dmp400048000	highly similar to ( 600) AT2G40490 | Symbols: HEME2 | HEME2; uroporphyrinogen decarboxylase | chr2:16912961-16914988 FORWARDhighly similar to ( 668) DCUP_TOBAC Uroporphyrinogen decarboxylase, chloroplast precursor (EC 4.1.1.37) (URO-D) (UPD) - Nicotiana tabacum (Common tobacco)highly similar to ( 590) loc_os03g21900 12003.m07594 protein uroporphyrinogen decarboxylase, putative, expressedhemE URO-…
CUST_46663_PI426222305	1.13364	4.77841	1.12544	4.26579	0.995373	4.17987	2.1971	60.507	0.932642	4.23737	1.92336	22.1081	0.959186	4.48425	2.29058	PGSC0003DMT400024390	Uroporphyrinogen-III synthase	chr02	Uroporphyrinogen-III synthase	PGSC0003DMP400016673	PGSC0003DMG401009429	PGSC0003DMC400016673	PGSC0003DMT400024390	19.6	tetrapyrrole synthesis.uroporphyrinogen III synthase	pgsc0003dmp400016673	PGSC0003DMT400024390
CUST_36318_PI426222305	1.02865	5.39292	1.15701	5.57894	0.97476	5.32743	2.18453	70.8261	0.952999	5.5887	2.04413	30.945	1.05195	5.96785	2.07665	PGSC0003DMT400039733	NADPH-protochlorophyllide oxidoreductase	chr12	NADPH:protochlorophyllide oxidoreductase	PGSC0003DMP400026921	PGSC0003DMG400015356	PGSC0003DMC400026921	PGSC0003DMT400039733	19.14	tetrapyrrole synthesis.protochlorophyllide reductase	pgsc0003dmp400026921	weakly similar to ( 184) AT4G27440 | Symbols: PORB | PORB (PROTOCHLOROPHYLLIDE OXIDOREDUCTASE B); oxidoreductase/ protochlorophyllide reductase | chr4:13725648-13727107 FORWARDweakly similar to ( 187) POR_PEA Protochlorophyllide reductase, chloroplast precursor (EC 1.3.1.33) (PCR) (NADPH-protochlorophyllide oxidoreductase) (POR) - Pisum sativum (Garden pea)weakly similar to ( 182) loc_os10g35370 …
CUST_24466_PI426222305	1.03563	5.13482	1.13419	5.27195	0.97265	4.81033	2.80787	93.5336	0.943089	5.16803	2.31212	41.0628	0.981123	5.35401	2.86189	PGSC0003DMT400062369	Gamma aminobutyrate transaminase isoform3	chr12	Gamma aminobutyrate transaminase isoform3	PGSC0003DMP400041996	PGSC0003DMG400024275	PGSC0003DMC400041996	PGSC0003DMT400062369	19.3	tetrapyrrole synthesis.GSA	pgsc0003dmp400041996	moderately similar to ( 444) AT3G22200 | Symbols: POP2, GABA-T, HER1 | POP2 (POLLEN-PISTIL INCOMPATIBILITY 2); 4-aminobutyrate transaminase/ 4-aminobutyrate:pyruvate transaminase | chr3:7835286-7838863 FORWARDmoderately similar to ( 454) loc_os08g10510 12008.m080107 protein aminotransferase y4uB, putative, expressedPRK06105 PRK07482 BioA PRK07480 PRK07036 PRK07481 PRK06541 PRK12403 PRK05965 PRK07…
CUST_17841_PI426222305	1.03299	4.42677	1.11751	4.41322	0.989795	4.47957	3.61002	165.106	0.936128	4.68375	2.72139	58.9201	0.952427	4.81499	3.79033	PGSC0003DMT400080033	Glutamyl-tRNA reductase	chr01	Glutamyl-tRNA reductase	PGSC0003DMP400054292	PGSC0003DMG400031163	PGSC0003DMC400054292	PGSC0003DMT400080033	19.2	tetrapyrrole synthesis.glu-tRNA reductase	pgsc0003dmp400054292	highly similar to ( 527) AT1G58290 | Symbols: HEMA1 | HEMA1; glutamyl-tRNA reductase | chr1:21624028-21626051 REVERSEhighly similar to ( 537) HEM12_CUCSA Glutamyl-tRNA reductase 2, chloroplast precursor (EC 1.2.1.70) (GluTR) - Cucumis sativus (Cucumber)moderately similar to ( 491) loc_os10g35840 12010.m06402 protein glutamyl-tRNA reductase, chloroplast precursor, putative, expressedhemA HemA Glut…
CUST_24289_PI426222305	1.10221	5.79009	1.09761	5.08909	1.43898	8.5518	2.26322	82.6683	0.954918	5.54298	2.55164	57.5881	1.07892	6.23219	2.09767	PGSC0003DMT400062368	Gamma aminobutyrate transaminase isoform3	chr12	Gamma aminobutyrate transaminase isoform3	PGSC0003DMP400041995	PGSC0003DMG400024275	PGSC0003DMC400041995	PGSC0003DMT400062368	19.3	tetrapyrrole synthesis.GSA	pgsc0003dmp400041995	moderately similar to ( 398) AT3G22200 | Symbols: POP2, GABA-T, HER1 | POP2 (POLLEN-PISTIL INCOMPATIBILITY 2); 4-aminobutyrate transaminase/ 4-aminobutyrate:pyruvate transaminase | chr3:7835286-7838863 FORWARDmoderately similar to ( 409) loc_os08g10510 12008.m080107 protein aminotransferase y4uB, putative, expressedPRK06105 PRK07482 BioA PRK07480 PRK07036 PRK06541 PRK12403 PRK07481 PRK05965 PRK07…
CUST_22458_PI426222305	1.01844	4.4476	1.10651	4.57657	1.31717	7.01364	3.01165	142.974	0.920373	4.78656	2.17995	32.426	1.03503	5.51303	2.90973	PGSC0003DMT400039404	Coproporphyrinigen III oxidase	chr03	Coproporphyrinigen III oxidase	PGSC0003DMP400026724	PGSC0003DMG400015239	PGSC0003DMC400026724	PGSC0003DMT400039404	19.8	tetrapyrrole synthesis.coproporphyrinogen III oxidase	pgsc0003dmp400026724	highly similar to ( 580) AT5G63290 | Symbols: | coproporphyrinogen oxidase-related | chr5:25369349-25370894 REVERSEhighly similar to ( 511) loc_os12g17070 12012.m073809 protein oxygen-independent coproporphyrinogen III oxidase-like protein sll1917, putative, expressedPRK07379 HemN PRK08599 PRK05799 PRK09057 PRK05628 PRK08898 PRK08949 PRK06294 PRK08807 PRK05660 PRK08446 PRK06582 PRK09249 Elp3 PRK0…
CUST_44707_PI426222305	1.01844	4.19546	1.47946	6.7015	0.974441	4.23794	4.61911	289.09	1.21372	6.73424	2.9983	80.9124	0.939015	4.58384	4.9191	PGSC0003DMT400045302	Chlorophyll synthase	chr06	Chlorophyll synthase	PGSC0003DMP400030696	PGSC0003DMG400017570	PGSC0003DMC400030696	PGSC0003DMT400045302	19.16	tetrapyrrole synthesis.chlorophyll b synthase	pgsc0003dmp400030696	highly similar to ( 802) AT1G44446 | Symbols: CH1, ATCAO, CAO | CH1 (CHLORINA 1); chlorophyllide a oxygenase | chr1:16849132-16851152 REVERSEhighly similar to ( 788) CAO_ORYSA Chlorophyllide a oxygenase, chloroplast precursor (EC 1.13.12.14) (Chlorophyll a oxygenase) (Chlorophyll b synthase) - Oryza sativa (Rice)highly similar to ( 789) loc_os10g41780 12010.m21805 protein chlorophyllide a oxygena…
CUST_22041_PI426222305	0.966789	5.50874	1.27613	7.32878	0.802286	4.37109	6.42966	79.8564	1.49841	10.6683	3.49567	36.1065	0.803278	5.02567	8.00428	PGSC0003DMT400041941	Chlorophyllase		Chlorophyllase	PGSC0003DMP400028422	PGSC0003DMG400016268	PGSC0003DMC400028422	PGSC0003DMT400041941	19.99	tetrapyrrole synthesis.unspecified	pgsc0003dmp400028422	moderately similar to ( 381) AT5G43860 | Symbols: ATCLH2, CLH2 | ATCLH2; chlorophyllase | chr5:17630492-17632184 FORWARDmoderately similar to ( 213) CLH1_CITSI Chlorophyllase-1, chloroplast precursor (EC 3.1.1.14) (Chlorophyll-chlorophyllido hydrolase 1) (Chlase 1) - Citrus sinensis (Sweet orange)moderately similar to ( 303) loc_os10g28370 12010.m05717 protein chlorophyllase-2, chloroplast precur…
CUST_24402_PI426222305	0.972989	4.78913	1.77833	10.4662	0.954718	5.14684	3.90099	102.211	1.13855	6.86915	2.36015	47.074	0.988372	5.5386	3.94688	PGSC0003DMT400062372	Gamma aminobutyrate transaminase isoform3	chr12	Gamma aminobutyrate transaminase isoform3	PGSC0003DMP400041999	PGSC0003DMG400024275	PGSC0003DMC400041999	PGSC0003DMT400062372	19.3	tetrapyrrole synthesis.GSA	pgsc0003dmp400041999	highly similar to ( 795) AT3G22200 | Symbols: POP2, GABA-T, HER1 | POP2 (POLLEN-PISTIL INCOMPATIBILITY 2); 4-aminobutyrate transaminase/ 4-aminobutyrate:pyruvate transaminase | chr3:7835286-7838863 FORWARDvery weakly similar to (82.8) GSA_CHLRE Glutamate-1-semialdehyde 2,1-aminomutase, chloroplast precursor (EC 5.4.3.8) (GSA) (Glutamate-1-semialdehyde aminotransferase) (GSA-AT) - Chlamydomonas re…
CUST_30030_PI426222305	1.01678	3.82662	2.6115	13.5682	0.972849	3.8983	3.96235	221.677	0.911538	4.03601	3.16729	95.091	1.00245	4.78715	3.95265	PGSC0003DMT400005613	Ferrochelatase	chr08	Ferrochelatase	PGSC0003DMP400003927	PGSC0003DMG400002201	PGSC0003DMC400003927	PGSC0003DMT400005613	19.2	tetrapyrrole synthesis.ferrochelatase	pgsc0003dmp400003927	highly similar to ( 572) AT5G26030 | Symbols: FC1, FC-I, ATFC-I | FC1 (ferrochelatase 1); ferrochelatase | chr5:9096675-9098752 FORWARDhighly similar to ( 624) HEMH_CUCSA Ferrochelatase-2, chloroplast precursor (EC 4.99.1.1) (Ferrochelatase II) (Protoheme ferro-lyase 2) (Heme synthetase 2) - Cucumis sativus (Cucumber)highly similar to ( 590) loc_os09g12560 12009.m059951 protein ferrochelatase-2, …
CUST_1218_PI426222305	0.862249	40.3021	1.37303	62.61	0.78648	38.8384	1.54953	175.078	0.860279	45.501	1.62169	113.635	0.884809	45.0121	1.75125	PGSC0003DMT400001248	Sirohydrochlorin ferrochelatase	chr02	Sirohydrochlorin ferrochelatase	PGSC0003DMP400000926	PGSC0003DMG400000477	PGSC0003DMC400000926	PGSC0003DMT400001248	19.32	tetrapyrrole synthesis.sirohydrochlorin ferrochelatase	pgsc0003dmp400000926	moderately similar to ( 255) AT1G50170 | Symbols: ATSIRB | ATSIRB (ARABIDOPSIS THALIANA SIROHYDROCHLORIN FERROCHELATASE B); sirohydrochlorin ferrochelatase | chr1:18582087-18583514 FORWARDmoderately similar to ( 243) loc_os02g19440 12002.m77796 protein sirohydrochlorin ferrochelatase, putative, expressedCbiX_SirB_N CbiX COG2138 PRK00923 CbiX_SirB_C PGSC0003DMT400001248
CUST_37195_PI426222305	1.04771	5.35358	1.196	5.7408	0.99858	5.3942	1.87471	47.1851	0.933498	5.35553	1.85673	24.2238	1.31116	7.54903	1.42981	PGSC0003DMT400082446	Glutamate-1-semialdehyde 2,1-aminomutase, chloroplastic	chr04	Glutamate-1-semialdehyde 2,1-aminomutase, chloroplastic	PGSC0003DMP400055595	PGSC0003DMG400032546	PGSC0003DMC400055595	PGSC0003DMT400082446	19.3	tetrapyrrole synthesis.GSA	pgsc0003dmp400055595	weakly similar to ( 141) AT5G63570 | Symbols: GSA1 | GSA1 (GLUTAMATE-1-SEMIALDEHYDE-2,1-AMINOMUTASE); glutamate-1-semialdehyde 2,1-aminomutase | chr5:25451957-25453620 FORWARDmoderately similar to ( 201) GSA_TOBAC Glutamate-1-semialdehyde 2,1-aminomutase, chloroplast precursor (EC 5.4.3.8) (GSA) (Glutamate-1-semialdehyde aminotransferase) (GSA-AT) - Nicotiana tabacum (Common tobacco)weakly simila…
CUST_24281_PI426222305	1.00078	5.16974	1.20048	5.68031	0.951037	5.1747	2.91651	100.768	0.926433	5.38747	2.21321	39.1029	1.63815	9.88048	1.78037	PGSC0003DMT400062371	Gamma aminobutyrate transaminase isoform3	chr12	Gamma aminobutyrate transaminase isoform3	PGSC0003DMP400041998	PGSC0003DMG400024275	PGSC0003DMC400041998	PGSC0003DMT400062371	19.3	tetrapyrrole synthesis.GSA	pgsc0003dmp400041998	highly similar to ( 750) AT3G22200 | Symbols: POP2, GABA-T, HER1 | POP2 (POLLEN-PISTIL INCOMPATIBILITY 2); 4-aminobutyrate transaminase/ 4-aminobutyrate:pyruvate transaminase | chr3:7835286-7838863 FORWARDhighly similar to ( 765) loc_os08g10510 12008.m080107 protein aminotransferase y4uB, putative, expressedPRK06105 BioA PRK07480 PRK07482 PRK07036 PRK07481 PRK06541 PRK12403 PRK05965 PRK07483 PRK0…
CUST_729_PI426222305	1.04501	20.1591	1.19686	23.4519	0.614477	12.645	1.82922	151.203	0.451584	9.94971	2.26078	101.692	0.846826	23.613	2.16009	PGSC0003DMT400001249	Sirohydrochlorin ferrochelatase	chr02	Sirohydrochlorin ferrochelatase	PGSC0003DMP400000927	PGSC0003DMG400000477	PGSC0003DMC400000927	PGSC0003DMT400001249	19.32	tetrapyrrole synthesis.sirohydrochlorin ferrochelatase	pgsc0003dmp400000927	moderately similar to ( 255) AT1G50170 | Symbols: ATSIRB | ATSIRB (ARABIDOPSIS THALIANA SIROHYDROCHLORIN FERROCHELATASE B); sirohydrochlorin ferrochelatase | chr1:18582087-18583514 FORWARDmoderately similar to ( 243) loc_os02g19440 12002.m77796 protein sirohydrochlorin ferrochelatase, putative, expressedCbiX_SirB_N CbiX COG2138 PRK00923 CbiX_SirB_C PGSC0003DMT400001249
CUST_43437_PI426222305	0.861991	26.9304	0.950442	27.8144	1.14465	36.7707	1.34322	76.2994	1.02597	34.5995	1.49864	60.1508	0.720149	23.9626	1.86519	PGSC0003DMT400033002	Nadph-cytochrome P450 oxydoreductase	chr02	Nadph-cytochrome P450 oxydoreductase	PGSC0003DMP400022453	PGSC0003DMG400012672	PGSC0003DMC400022453	PGSC0003DMT400033002	19.99	tetrapyrrole synthesis.unspecified	pgsc0003dmp400022453	highly similar to ( 569) AT3G02280 | Symbols: | flavodoxin family protein | chr3:453646-457659 FORWARDweakly similar to ( 182) NCPR_CATRO NADPH--cytochrome P450 reductase (EC 1.6.2.4) (CPR) (P450R) - Catharanthus roseus (Rosy periwinkle) (Madagascar periwinkle)highly similar to ( 530) loc_os01g53250 12001.m11494 protein NADPH reductase TAH18, putative, expressedCysJ PRK06214 FAD_binding_1 cysJ PG…
CUST_43378_PI426222305	1.02386	158.797	1.05357	151.621	1.18633	193.121	1.14706	367.294	0.877224	152.271	1.30568	269.628	0.756655	128.751	1.51596	PGSC0003DMT400033000	NADPH fad oxidoreductase	chr02	Nadph-cytochrome P450 oxydoreductase	PGSC0003DMP400022451	PGSC0003DMG400012672	PGSC0003DMC400022451	PGSC0003DMT400033000	19.99	tetrapyrrole synthesis.unspecified	pgsc0003dmp400022451	highly similar to ( 773) AT3G02280 | Symbols: | flavodoxin family protein | chr3:453646-457659 FORWARDmoderately similar to ( 220) NCPR_CATRO NADPH--cytochrome P450 reductase (EC 1.6.2.4) (CPR) (P450R) - Catharanthus roseus (Rosy periwinkle) (Madagascar periwinkle)highly similar to ( 701) loc_os01g53250 12001.m11494 protein NADPH reductase TAH18, putative, expressedCysJ cysJ PRK06214 FAD_binding_…
CUST_43411_PI426222305	1.23144	40.3618	0.813834	25.0477	0.968363	33.2202	1.32701	89.6338	1.07315	39.5347	1.22447	53.37	0.768827	27.42	1.72602	PGSC0003DMT400033001	Nadph-cytochrome P450 oxydoreductase	chr02	Nadph-cytochrome P450 oxydoreductase	PGSC0003DMP400022452	PGSC0003DMG400012672	PGSC0003DMC400022452	PGSC0003DMT400033001	19.99	tetrapyrrole synthesis.unspecified	pgsc0003dmp400022452	moderately similar to ( 469) AT3G02280 | Symbols: | flavodoxin family protein | chr3:453646-457659 FORWARDvery weakly similar to (92.4) NCPR_PHAAU NADPH--cytochrome P450 reductase (EC 1.6.2.4) (CPR) (P450R) - Phaseolus aureus (Mung bean) (Vigna radiata)moderately similar to ( 407) loc_os01g53250 12001.m11494 protein NADPH reductase TAH18, putative, expressedCysJ Flavodoxin_1 FAD_binding_1 cysJ PG…
CUST_23683_PI426222305	1.98724	17.1044	1.65912	14.6663	0.903254	8.25234	1.34837	55.913	0.980737	9.37793	2.19585	44.3309	0.616374	5.64834	2.18759	PGSC0003DMT400002343	Chlorophyll synthase	chr11	Chlorophyll synthase	PGSC0003DMP400001696	PGSC0003DMG402000895	PGSC0003DMC400001696	PGSC0003DMT400002343	19.16	tetrapyrrole synthesis.chlorophyll b synthase	pgsc0003dmp400001696	highly similar to ( 600) AT1G44446 | Symbols: CH1, ATCAO, CAO | CH1 (CHLORINA 1); chlorophyllide a oxygenase | chr1:16849132-16851152 REVERSEhighly similar to ( 605) CAO_ORYSA Chlorophyllide a oxygenase, chloroplast precursor (EC 1.13.12.14) (Chlorophyll a oxygenase) (Chlorophyll b synthase) - Oryza sativa (Rice)highly similar to ( 607) loc_os10g41780 12010.m21805 protein chlorophyllide a oxygena…
CUST_34197_PI426222305	0.95603	14.5556	0.9948	17.1043	0.638639	11.0775	0.996139	30.8441	0.698446	13.3569	0.789977	21.4668	1.04389	17.0004	0.954256	PGSC0003DMT400030683	Gamma aminobutyrate transaminase isoform1	chr07	Gamma aminobutyrate transaminase isoform1	PGSC0003DMP400020840	PGSC0003DMG400011754	PGSC0003DMC400020840	PGSC0003DMT400030683	19.3	tetrapyrrole synthesis.GSA	pgsc0003dmp400020840	highly similar to ( 781) AT3G22200 | Symbols: POP2, GABA-T, HER1 | POP2 (POLLEN-PISTIL INCOMPATIBILITY 2); 4-aminobutyrate transaminase/ 4-aminobutyrate:pyruvate transaminase | chr3:7835286-7838863 FORWARDhighly similar to ( 792) loc_os04g52450 12004.m101652 protein aminotransferase y4uB, putative, expressedPRK06105 BioA PRK07480 PRK07482 PRK07036 PRK07481 PRK06541 PRK09221 PRK12403 PRK05965 GabT…
CUST_44370_PI426222305	0.844382	73.8823	1.34667	105.581	1.11989	99.4814	0.636616	112.803	0.564694	54.4962	0.692168	83.5828	1.08851	100.274	0.584852	PGSC0003DMT400030976	Alanine-glyoxylate aminotransferase	chr10	Alanine-glyoxylate aminotransferase	PGSC0003DMP400021041	PGSC0003DMG400011868	PGSC0003DMC400021041	PGSC0003DMT400030976	19.3	tetrapyrrole synthesis.GSA	pgsc0003dmp400021041	highly similar to ( 707) AT3G08860 | Symbols: | alanine--glyoxylate aminotransferase, putative / beta-alanine-pyruvate aminotransferase, putative / AGT, putative | chr3:2696754-2699087 REVERSEweakly similar to ( 102) GSA_HORVU Glutamate-1-semialdehyde 2,1-aminomutase, chloroplast precursor (EC 5.4.3.8) (GSA) (Glutamate-1-semialdehyde aminotransferase) (GSA-AT) - Hordeum vulgare (Barley)highly sim…
CUST_41378_PI426222305	1.01419	105.841	1.29099	124.157	1.08291	117.77	0.849257	145.084	0.718258	83.7101	0.947585	121.17	1.05043	119.078	0.808482	PGSC0003DMT400008034	Glutamyl-tRNA reductase	chr01	Glutamyl-tRNA reductase	PGSC0003DMP400005584	PGSC0003DMG400003105	PGSC0003DMC400005584	PGSC0003DMT400008034	19.2	tetrapyrrole synthesis.glu-tRNA reductase	pgsc0003dmp400005584	highly similar to ( 619) AT1G58290 | Symbols: HEMA1 | HEMA1; glutamyl-tRNA reductase | chr1:21624028-21626051 REVERSEhighly similar to ( 662) HEM11_CUCSA Glutamyl-tRNA reductase 1, chloroplast precursor (EC 1.2.1.70) (GluTR) - Cucumis sativus (Cucumber)highly similar to ( 553) loc_os10g35840 12010.m06402 protein glutamyl-tRNA reductase, chloroplast precursor, putative, expressedhemA HemA GlutR_N …
CUST_41400_PI426222305	1.04458	109.454	1.32924	129.761	1.24473	136.469	0.865754	150.951	0.75937	88.7368	0.826625	108.526	0.971937	112.133	0.890752	PGSC0003DMT400008033	Glutamyl-tRNA reductase	chr01	Glutamyl-tRNA reductase	PGSC0003DMP400005583	PGSC0003DMG400003105	PGSC0003DMC400005583	PGSC0003DMT400008033	19.2	tetrapyrrole synthesis.glu-tRNA reductase	pgsc0003dmp400005583	moderately similar to ( 473) AT1G58290 | Symbols: HEMA1 | HEMA1; glutamyl-tRNA reductase | chr1:21624028-21626051 REVERSEhighly similar to ( 504) HEM11_CUCSA Glutamyl-tRNA reductase 1, chloroplast precursor (EC 1.2.1.70) (GluTR) - Cucumis sativus (Cucumber)moderately similar to ( 435) loc_os10g35840 12010.m06402 protein glutamyl-tRNA reductase, chloroplast precursor, putative, expressedhemA HemA …
CUST_41385_PI426222305	1.08785	109.617	1.24829	116.508	1.12	118.807	0.761492	121.582	0.810104	90.798	0.922833	114.124	1.03981	113.464	0.732337	PGSC0003DMT400008035	Glutamyl-tRNA reductase	chr01	Glutamyl-tRNA reductase	PGSC0003DMP400005585	PGSC0003DMG400003105	PGSC0003DMC400005585	PGSC0003DMT400008035	19.2	tetrapyrrole synthesis.glu-tRNA reductase	pgsc0003dmp400005585	highly similar to ( 588) AT1G58290 | Symbols: HEMA1 | HEMA1; glutamyl-tRNA reductase | chr1:21624028-21626051 REVERSEhighly similar to ( 618) HEM11_CUCSA Glutamyl-tRNA reductase 1, chloroplast precursor (EC 1.2.1.70) (GluTR) - Cucumis sativus (Cucumber)highly similar to ( 535) loc_os10g35840 12010.m06402 protein glutamyl-tRNA reductase, chloroplast precursor, putative, expressedhemA HemA GlutR_N …
CUST_28139_PI426222305	1.04124	1236.39	1.27829	1413.97	1.13418	1403.71	0.502389	920.824	0.672794	897.633	0.801515	1196.52	0.95906	1242.29	0.523835	PGSC0003DMT400004193	Protoheme IX farnesyltransferase	chr01	Protoheme IX farnesyltransferase	PGSC0003DMP400002996	PGSC0003DMG400001672	PGSC0003DMC400002996	PGSC0003DMT400004193	19.99	tetrapyrrole synthesis.unspecified	pgsc0003dmp400002996	moderately similar to ( 462) AT2G44520 | Symbols: COX10 | COX10 (cytochrome c oxidase 10); prenyltransferase/ protoheme IX farnesyltransferase | chr2:18379660-18381731 FORWARDmoderately similar to ( 442) loc_os01g34390 12001.m09744 protein protoheme IX farnesyltransferase, mitochondrial precursor, putative, expressedCyoE PRK04375 UbiA ubiA PGSC0003DMT400004193
CUST_28146_PI426222305	1.08925	382.149	1.17493	381.359	1.33416	488.642	0.66607	367.626	0.725275	286.454	0.943778	412.575	1.02708	391.146	0.648506	PGSC0003DMT400004194	Protoheme IX farnesyltransferase	chr01	Protoheme IX farnesyltransferase	PGSC0003DMP400002997	PGSC0003DMG400001672	PGSC0003DMC400002997	PGSC0003DMT400004194	19.99	tetrapyrrole synthesis.unspecified	pgsc0003dmp400002997	weakly similar to ( 149) AT2G44520 | Symbols: COX10 | COX10 (cytochrome c oxidase 10); prenyltransferase/ protoheme IX farnesyltransferase | chr2:18379660-18381731 FORWARDweakly similar to ( 164) loc_os01g34390 12001.m09744 protein protoheme IX farnesyltransferase, mitochondrial precursor, putative, expressed PGSC0003DMT400004194
CUST_28085_PI426222305	1.11699	376.835	1.18977	370.12	1.23242	437.538	0.687294	358.068	0.758895	284.711	0.904885	380.781	1.01969	370.05	0.674022	PGSC0003DMT400004195	Protoheme IX farnesyltransferase	chr01	Protoheme IX farnesyltransferase	PGSC0003DMP400002998	PGSC0003DMG400001672	PGSC0003DMC400002998	PGSC0003DMT400004195	19.99	tetrapyrrole synthesis.unspecified	pgsc0003dmp400002998	moderately similar to ( 477) AT2G44520 | Symbols: COX10 | COX10 (cytochrome c oxidase 10); prenyltransferase/ protoheme IX farnesyltransferase | chr2:18379660-18381731 FORWARDmoderately similar to ( 456) loc_os01g34390 12001.m09744 protein protoheme IX farnesyltransferase, mitochondrial precursor, putative, expressedCyoE PRK04375 UbiA ubiA PGSC0003DMT400004195
CUST_28121_PI426222305	1.15229	375.955	1.15066	344.398	1.27987	438.122	0.712458	366.439	0.838092	305.037	0.988003	396.755	1.05315	369.217	0.676504	PGSC0003DMT400004196	Protoheme IX farnesyltransferase	chr01	Protoheme IX farnesyltransferase	PGSC0003DMP400002999	PGSC0003DMG400001672	PGSC0003DMC400002999	PGSC0003DMT400004196	19.99	tetrapyrrole synthesis.unspecified	pgsc0003dmp400002999	weakly similar to ( 150) AT2G44520 | Symbols: COX10 | COX10 (cytochrome c oxidase 10); prenyltransferase/ protoheme IX farnesyltransferase | chr2:18379660-18381731 FORWARDweakly similar to ( 166) loc_os01g34390 12001.m09744 protein protoheme IX farnesyltransferase, mitochondrial precursor, putative, expressedPRK04375 PGSC0003DMT400004196
CUST_31329_PI426222305	1.03537	211.157	1.19442	224.022	1.0392	218.643	0.654653	217.43	0.756012	171.606	0.923916	228.911	1.09453	240.206	0.598113	PGSC0003DMT400034937	Protoporphyrinogen oxidase, mitochondrial	chr03	Protoporphyrinogen oxidase, mitochondrial	PGSC0003DMP400023771	PGSC0003DMG400013429	PGSC0003DMC400023771	PGSC0003DMT400034937	19.9	tetrapyrrole synthesis.protoporphyrin IX oxidase	pgsc0003dmp400023771	weakly similar to ( 148) AT5G14220 | Symbols: HEMG2, MEE61, PPO2 | HEMG2; electron carrier/ oxidoreductase/ protoporphyrinogen oxidase | chr5:4583506-4587369 REVERSEweakly similar to ( 195) PPOM_TOBAC Protoporphyrinogen oxidase, mitochondrial (EC 1.3.3.4) (PPO II) (Protoporphyrinogen IX oxidase isozyme II) (PPX II) (PX-2) - Nicotiana tabacum (Common tobacco)weakly similar to ( 132) loc_os04g41260…
CUST_31264_PI426222305	1.07868	211.981	1.12122	209.085	1.05768	218.809	0.662512	218.545	0.766885	168.766	1.00865	242.69	1.11105	238.569	0.596292	PGSC0003DMT400034936	Protoporphyrinogen oxidase, mitochondrial	chr03	Protoporphyrinogen oxidase, mitochondrial	PGSC0003DMP400023770	PGSC0003DMG400013429	PGSC0003DMC400023770	PGSC0003DMT400034936	19.9	tetrapyrrole synthesis.protoporphyrin IX oxidase	pgsc0003dmp400023770	weakly similar to ( 197) AT5G14220 | Symbols: HEMG2, MEE61, PPO2 | HEMG2; electron carrier/ oxidoreductase/ protoporphyrinogen oxidase | chr5:4583506-4587369 REVERSEmoderately similar to ( 254) PPOM_TOBAC Protoporphyrinogen oxidase, mitochondrial (EC 1.3.3.4) (PPO II) (Protoporphyrinogen IX oxidase isozyme II) (PPX II) (PX-2) - Nicotiana tabacum (Common tobacco)weakly similar to ( 175) loc_os04g4…
CUST_31382_PI426222305	1.10375	223.733	1.24573	233.722	1.08434	229.235	0.753767	252.837	0.78081	178.46	0.824679	205.234	1.11333	245.102	0.677037	PGSC0003DMT400034938	Protoporphyrinogen oxidase	chr03	Protoporphyrinogen oxidase, mitochondrial	PGSC0003DMP400023772	PGSC0003DMG400013429	PGSC0003DMC400023772	PGSC0003DMT400034938	19.9	tetrapyrrole synthesis.protoporphyrin IX oxidase	pgsc0003dmp400023772	moderately similar to ( 393) AT5G14220 | Symbols: HEMG2, MEE61, PPO2 | HEMG2; electron carrier/ oxidoreductase/ protoporphyrinogen oxidase | chr5:4583506-4587369 REVERSEhighly similar to ( 612) PPOM_TOBAC Protoporphyrinogen oxidase, mitochondrial (EC 1.3.3.4) (PPO II) (Protoporphyrinogen IX oxidase isozyme II) (PPX II) (PX-2) - Nicotiana tabacum (Common tobacco)moderately similar to ( 351) loc_os…
CUST_29965_PI426222305	1.03948	94.6274	1.62978	137.676	0.984334	93.2457	0.541515	79.8748	0.689042	69.7063	0.703588	78.6437	1.09435	109.062	0.49483	PGSC0003DMT400076803	Ornithine aminotransferase	chr08	Ornithine aminotransferase	PGSC0003DMP400052039	PGSC0003DMG400029872	PGSC0003DMC400052039	PGSC0003DMT400076803	19.3	tetrapyrrole synthesis.GSA	pgsc0003dmp400052039	moderately similar to ( 362) AT5G46180 | Symbols: DELTA-OAT | delta-OAT; ornithine-oxo-acid transaminase | chr5:18718766-18721271 REVERSEmoderately similar to ( 358) loc_os03g44150 12003.m09454 protein ornithine aminotransferase, putative, expressedArgD rocD GabT rocD BioA Aminotran_3 PRK03711 argD argD PRK11522 PRK07323 PRK08117 PRK02627 PRK05769 PRK08593 PRK07495 PRK06058 argD PRK07483 PRK06918…
CUST_34170_PI426222305	0.91577	10.5687	1.4208	15.104	1.16602	14.1548	1.14841	29.6096	0.850532	10.8649	1.05331	16.928	0.716548	10.0079	1.6027	PGSC0003DMT400030682	Gamma aminobutyrate transaminase isoform1	chr07	Gamma aminobutyrate transaminase isoform1	PGSC0003DMP400020839	PGSC0003DMG400011754	PGSC0003DMC400020839	PGSC0003DMT400030682	19.3	tetrapyrrole synthesis.GSA	pgsc0003dmp400020839	highly similar to ( 683) AT3G22200 | Symbols: POP2, GABA-T, HER1 | POP2 (POLLEN-PISTIL INCOMPATIBILITY 2); 4-aminobutyrate transaminase/ 4-aminobutyrate:pyruvate transaminase | chr3:7835286-7838863 FORWARDhighly similar to ( 698) loc_os04g52450 12004.m101652 protein aminotransferase y4uB, putative, expressedPRK06105 BioA PRK07482 PRK07480 PRK07036 PRK06541 PRK07481 PRK12403 PRK05965 PRK09221 Amin…
CUST_19625_PI426222305	0.854706	394.012	1.22831	528.83	0.99168	479.145	0.888695	633.832	1.20677	620.5	0.93486	546.905	0.948411	475.501	0.937036	PGSC0003DMT400002867	Protoporphyrinogen oxidase	chr01	Protoporphyrinogen oxidase	PGSC0003DMP400002074	PGSC0003DMG400001117	PGSC0003DMC400002074	PGSC0003DMT400002867	19.9	tetrapyrrole synthesis.protoporphyrin IX oxidase	pgsc0003dmp400002074	moderately similar to ( 438) AT4G01690 | Symbols: PPOX, HEMG1, PPO1 | PPOX; protoporphyrinogen oxidase | chr4:729929-732309 FORWARDhighly similar to ( 503) PPOC_TOBAC Protoporphyrinogen oxidase, chloroplast precursor (EC 1.3.3.4) (PPO I) (Protoporphyrinogen IX oxidase isozyme I) (PPX I) - Nicotiana tabacum (Common tobacco)moderately similar to ( 440) loc_os01g18320 12001.m08374 protein protoporph…
CUST_19608_PI426222305	0.848784	433.047	1.21942	579.875	0.889135	474.03	0.840325	662.048	1.14845	652.719	0.893695	572.152	0.889606	494.503	0.944604	PGSC0003DMT400002866	Protoporphyrinogen oxidase	chr01	Protoporphyrinogen oxidase	PGSC0003DMP400002073	PGSC0003DMG400001117	PGSC0003DMC400002073	PGSC0003DMT400002866	19.9	tetrapyrrole synthesis.protoporphyrin IX oxidase	pgsc0003dmp400002073	highly similar to ( 726) AT4G01690 | Symbols: PPOX, HEMG1, PPO1 | PPOX; protoporphyrinogen oxidase | chr4:729929-732309 FORWARDhighly similar to ( 917) PPOC_TOBAC Protoporphyrinogen oxidase, chloroplast precursor (EC 1.3.3.4) (PPO I) (Protoporphyrinogen IX oxidase isozyme I) (PPX I) - Nicotiana tabacum (Common tobacco)highly similar to ( 704) loc_os01g18320 12001.m08374 protein protoporphyrinogen…
CUST_19487_PI426222305	0.861972	440.84	1.20254	572.775	0.911268	486.753	0.832985	657.533	1.08664	619.334	0.847554	542.81	0.854665	492.815	0.974632	PGSC0003DMT400002865	Protoporphyrinogen oxidase	chr01	Protoporphyrinogen oxidase	PGSC0003DMP400002072	PGSC0003DMG400001117	PGSC0003DMC400002072	PGSC0003DMT400002865	19.9	tetrapyrrole synthesis.protoporphyrin IX oxidase	pgsc0003dmp400002072	moderately similar to ( 368) AT4G01690 | Symbols: PPOX, HEMG1, PPO1 | PPOX; protoporphyrinogen oxidase | chr4:729929-732309 FORWARDmoderately similar to ( 426) PPOC_TOBAC Protoporphyrinogen oxidase, chloroplast precursor (EC 1.3.3.4) (PPO I) (Protoporphyrinogen IX oxidase isozyme I) (PPX I) - Nicotiana tabacum (Common tobacco)moderately similar to ( 376) loc_os01g18320 12001.m08374 protein protop…
CUST_19495_PI426222305	0.868565	421.932	1.11887	507.471	0.946774	481.445	0.858586	644.138	1.13991	617.909	0.94192	573.186	0.862966	457.724	0.994924	PGSC0003DMT400002868	Protoporphyrinogen oxidase	chr01	Protoporphyrinogen oxidase	PGSC0003DMP400002075	PGSC0003DMG400001117	PGSC0003DMC400002075	PGSC0003DMT400002868	19.9	tetrapyrrole synthesis.protoporphyrin IX oxidase	pgsc0003dmp400002075	moderately similar to ( 355) AT4G01690 | Symbols: PPOX, HEMG1, PPO1 | PPOX; protoporphyrinogen oxidase | chr4:729929-732309 FORWARDmoderately similar to ( 488) PPOC_TOBAC Protoporphyrinogen oxidase, chloroplast precursor (EC 1.3.3.4) (PPO I) (Protoporphyrinogen IX oxidase isozyme I) (PPX I) - Nicotiana tabacum (Common tobacco)moderately similar to ( 334) loc_os01g18320 12001.m08374 protein protop…

## Sheet: Selected Glycoalkaloids TableS9
Code ()*	WL6		Blue6		Red6		WL24		Blue24		Red24		Dark (18oC)		Dark (21oC)
Systematic	Normalized	Raw	Normalized	Raw	Normalized	Raw	Normalized	Raw	Normalized	Raw	Normalized	Raw	Normalized	Raw	Normalized	Raw	PrimaryAccession	UniRef based putative functional annotation	Chromosome	putative function	peptide ID	gene ID	CDS ID	transcript ID	MpMan bin	MapMan name	MapMan pep	MapMan description	GO: CC	GO: MF	GO: BP
CUST_40193_PI426222305	0.883657	1333.35	1.19642	1853.58	0.836562	1306.66	11.5721	26892.5	9.82446	16561.2	1.71419	3251.96	0.688774	1120.9	0.782946	1248.95	PGSC0003DMT400068388	Cytochrome P450	chr06	Cytochrome P450	PGSC0003DMP400046213	PGSC0003DMG400026594	PGSC0003DMC400046213	PGSC0003DMT400068388	26.1	misc.cytochrome P450	pgsc0003dmp400046213	moderately similar to ( 442) AT3G14690 | Symbols: CYP72A15 | CYP72A15; electron carrier/ heme binding / iron ion binding / monooxygenase/ oxygen binding | chr3:4937410-4939310 FORWARDmoderately similar to ( 421) C72A1_CATRO Cytochrome P450 72A1 (EC 1.3.3.9) (CYPLXXII) (Secologanin synthase) (SLS) - Catharanthus roseus (Rosy periwinkle) (Madagascar periwinkle)moderately similar to ( 450) loc_os01g…
CUST_40192_PI426222305	0.951243	1355.25	1.11096	1556.01	0.776218	1155.59	11.7331	25750.7	9.79023	15514.1	1.69181	3055.28	0.681028	1052.76	0.816898	1199.06	PGSC0003DMT400068373	Cytochrome P450	chr06	Cytochrome P450	PGSC0003DMP400046202	PGSC0003DMG400026586	PGSC0003DMC400046202	PGSC0003DMT400068373	26.1	misc.cytochrome P450	pgsc0003dmp400046202	moderately similar to ( 442) AT3G14690 | Symbols: CYP72A15 | CYP72A15; electron carrier/ heme binding / iron ion binding / monooxygenase/ oxygen binding | chr3:4937410-4939310 FORWARDmoderately similar to ( 421) C72A1_CATRO Cytochrome P450 72A1 (EC 1.3.3.9) (CYPLXXII) (Secologanin synthase) (SLS) - Catharanthus roseus (Rosy periwinkle) (Madagascar periwinkle)moderately similar to ( 450) loc_os01g…
CUST_24656_PI426222305	0.503382	33.2749	0.737749	83.6038	0.402556	27.5222	19.6415	1988.21	15.112	1138.59	1.26413	105.814	0.401042	39.5361	1.53771	143.775	PGSC0003DMT400054476	DWARF1/DIMINUTO	chr02	DWARF1/DIMINUTO	PGSC0003DMP400036651	PGSC0003DMG400021142	PGSC0003DMC400036651	PGSC0003DMT400054476	17.3.1.2.8	hormone metabolism.brassinosteroid.synthesis-degradation.sterols.DWF1	pgsc0003dmp400036651	highly similar to ( 884) AT3G19820 | Symbols: DWF1, DIM, EVE1, DIM1, CBB1 | DWF1 (DWARF 1); calmodulin binding / catalytic | chr3:6879835-6881616 REVERSEhighly similar to ( 882) DIM_PEA Cell elongation protein diminuto - Pisum sativum (Garden pea)highly similar to ( 901) loc_os10g25780 12010.m21783 protein cell elongation protein diminuto, putative, expressedGlcD PGSC0003DMT400054476
CUST_24399_PI426222305	0.891592	38.2758	0.815224	66.3092	0.526552	26.4891	20.3985	1356.57	16.4518	800.145	1.50016	86.0363	0.629337	36.7602	0.934283	44.4377	PGSC0003DMT400062385	Gamma aminobutyrate transaminase isoform2	chr12	Gamma aminobutyrate transaminase isoform2	PGSC0003DMP400042007	PGSC0003DMG400024281	PGSC0003DMC400042007	PGSC0003DMT400062385	19.3	tetrapyrrole synthesis.GSA	pgsc0003dmp400042007	moderately similar to ( 482) AT3G22200 | Symbols: POP2, GABA-T, HER1 | POP2 (POLLEN-PISTIL INCOMPATIBILITY 2); 4-aminobutyrate transaminase/ 4-aminobutyrate:pyruvate transaminase | chr3:7835286-7838863 FORWARDmoderately similar to ( 477) loc_os04g52450 12004.m101652 protein aminotransferase y4uB, putative, expressedPRK06105 BioA PRK07480 PRK07482 PRK07036 PRK07483 PRK05965 PRK09221 PRK07481 PRK06…
CUST_34216_PI426222305	0.81987	80.162	0.509244	138.501	0.361434	38.6206	13.7293	1945.77	10.3324	1206.04	0.5871	76.058	0.287411	49.2692	0.634191	126.585	PGSC0003DMT400030650	SGA	chr07	SGA	PGSC0003DMP400020813	PGSC0003DMG400011740	PGSC0003DMC400020813	PGSC0003DMT400030650	26.2	misc.UDP glucosyl and glucoronyl transferases	pgsc0003dmp400020813	moderately similar to ( 294) AT2G15480 | Symbols: UGT73B5 | UGT73B5 (UDP-glucosyl transferase 73B5); UDP-glucosyltransferase/ UDP-glycosyltransferase/ quercetin 3-O-glucosyltransferase/ transferase, transferring glycosyl groups | chr2:6758817-6760452 FORWARDweakly similar to ( 159) ZOX_PHAVU Zeatin O-xylosyltransferase (EC 2.4.2.40) (Zeatin O-beta-D-xylosyltransferase) - Phaseolus vulgaris (Kidne…
CUST_24361_PI426222305	0.977034	4.23875	1.43435	6.92719	0.925987	3.9729	14.0956	113.8	10.0669	62.506	0.886396	5.24283	0.892322	4.28812	1.0137	4.39196	PGSC0003DMT400062367	Cytochrome P450 monooxygenase	chr12	Cytochrome P450 monooxygenase	PGSC0003DMP400041994	PGSC0003DMG400024274	PGSC0003DMC400041994	PGSC0003DMT400062367	26.1	misc.cytochrome P450	pgsc0003dmp400041994	moderately similar to ( 362) AT2G32440 | Symbols: KAO2, CYP88A4 | KAO2 (ENT-KAURENOIC ACID HYDROXYLASE 2); ent-kaurenoate oxidase/ oxygen binding | chr2:13775668-13777783 FORWARDmoderately similar to ( 310) KAO1_HORVU Ent-kaurenoic acid oxidase 1 (EC 1.14.13.79) (gpr5) - Hordeum vulgare (Barley)moderately similar to ( 301) loc_os06g02019 12006.m04938 protein cytochrome P450 88A1, putative, expres…
CUST_17868_PI426222305	0.879265	5.01733	1.48139	9.52484	0.882551	5.27551	7.25408	82.3022	3.16466	21.5268	1.67844	20.4542	0.834505	5.32534	0.977514	5.77973	PGSC0003DMT400032234	CYP72A58	chr07	CYP72A58	PGSC0003DMP400021894	PGSC0003DMG402012386	PGSC0003DMC400021894	PGSC0003DMT400032234	26.1	misc.cytochrome P450	pgsc0003dmp400021894	moderately similar to ( 209) AT3G14680 | Symbols: CYP72A14 | CYP72A14; electron carrier/ heme binding / iron ion binding / monooxygenase/ oxygen binding | chr3:4934478-4936462 FORWARDweakly similar to ( 187) C72A1_CATRO Cytochrome P450 72A1 (EC 1.3.3.9) (CYPLXXII) (Secologanin synthase) (SLS) - Catharanthus roseus (Rosy periwinkle) (Madagascar periwinkle)weakly similar to ( 195) loc_os01g43740 12…		GO:0020037;GO:0016705;GO:0009055	GO:0055114
CUST_24958_PI426222305	1.03734	106.476	1.14416	110.042	1.22331	140.336	3.62929	632.494	1.78799	204.289	0.88229	112.346	0.614884	70.5142	0.278607	36.8491	PGSC0003DMT400045138	UDP-glucose:solanidine glucosyltransferase	chr08	UDP-glucose:solanidine glucosyltransferase	PGSC0003DMP400030574	PGSC0003DMG400017508	PGSC0003DMC400030574	PGSC0003DMT400045138	26.2	misc.UDP glucosyl and glucoronyl transferases	pgsc0003dmp400030574	moderately similar to ( 333) AT2G15480 | Symbols: UGT73B5 | UGT73B5 (UDP-glucosyl transferase 73B5); UDP-glucosyltransferase/ UDP-glycosyltransferase/ quercetin 3-O-glucosyltransferase/ transferase, transferring glycosyl groups | chr2:6758817-6760452 FORWARDweakly similar to ( 134) ZOX_PHAVU Zeatin O-xylosyltransferase (EC 2.4.2.40) (Zeatin O-beta-D-xylosyltransferase) - Phaseolus vulgaris (Kidne…
CUST_5012_PI426222305	1.05475	5.31202	1.28339	6.43466	0.943729	4.75512	2.56247	128.101	2.16188	13.0524	2.42374	55.5343	0.86399	4.28259	2.11998	12.2473	PGSC0003DMT400092714	3-hydroxy-3-methylglutaryl-coenzyme A reductase 1	chr11	3-hydroxy-3-methylglutaryl-coenzyme A reductase 1	PGSC0003DMP400064389	PGSC0003DMG400042285	PGSC0003DMC400064389	PGSC0003DMT400092714	16.1.2.3	secondary metabolism.isoprenoids.mevalonate pathway.HMG-CoA reductase	pgsc0003dmp400064389	weakly similar to ( 142) AT1G76490 | Symbols: HMG1, HMGR1 | HMG1 (HYDROXY METHYLGLUTARYL COA REDUCTASE 1); hydroxymethylglutaryl-CoA reductase | chr1:28695801-28698206 FORWARDmoderately similar to ( 312) HMDH1_SOLTU 3-hydroxy-3-methylglutaryl-coenzyme A reductase 1 (EC 1.1.1.34) (HMG-CoA reductase 1) (HMGR1) (HMGR) - Solanum tuberosum (Potato)very weakly similar to (99.4) loc_os08g40180 12008.m07…
CUST_4739_PI426222305	1.04032	4.30865	1.12668	4.60771	0.995373	4.48298	2.29088	68.5058	0.932642	4.59141	2.20908	32.2667	0.969637	4.65739	1.04369	4.48014	PGSC0003DMT400073861	Cycloartenol synthase	chr04	Cycloartenol synthase	PGSC0003DMP400049993	PGSC0003DMG400028702	PGSC0003DMC400049993	PGSC0003DMT400073861	16.1.5	secondary metabolism.isoprenoids.terpenoids	pgsc0003dmp400049993	highly similar to ( 848) AT2G07050 | Symbols: CAS1 | CAS1 (cycloartenol synthase 1); cycloartenol synthase | chr2:2924629-2930295 FORWARDhighly similar to ( 810) loc_os02g04710 12002.m33547 protein cycloartenol synthase, putative, expressedSQCY_1 SQCY SqhC ISOPREN_C2_like PGSC0003DMT400073861	GO:0016021;GO:0005773	GO:0016871	GO:0010027;GO:0009555;GO:0019745
CUST_44204_PI426222305	1.11109	94.068	1.1832	156.073	1.10781	105.621	1.20599	158.647	1.37756	147.356	0.603483	63.3634	0.58258	57.5018	1.44797	138.28	PGSC0003DMT400035542	3-hydroxy-3-methylglutaryl-coenzyme A reductase 1	chr02	3-hydroxy-3-methylglutaryl-coenzyme A reductase 1	PGSC0003DMP400024174	PGSC0003DMG400013663	PGSC0003DMC400024174	PGSC0003DMT400035542	16.1.2.3	secondary metabolism.isoprenoids.mevalonate pathway.HMG-CoA reductase	pgsc0003dmp400024174	highly similar to ( 672) AT1G76490 | Symbols: HMG1, HMGR1 | HMG1 (HYDROXY METHYLGLUTARYL COA REDUCTASE 1); hydroxymethylglutaryl-CoA reductase | chr1:28695801-28698206 FORWARDhighly similar to ( 763) HMDH1_SOLTU 3-hydroxy-3-methylglutaryl-coenzyme A reductase 1 (EC 1.1.1.34) (HMG-CoA reductase 1) (HMGR1) (HMGR) - Solanum tuberosum (Potato)highly similar to ( 653) loc_os08g40180 12008.m07998 prote…	GO:0016021;GO:0005789	GO:0050661;GO:0004420	GO:0055114;GO:0008299;GO:0015936

## Sheet: Selected Flavonoid TableS10
Code ()*	WL6		Blue6		Red6		WL24		Blue24		Red24		Dark (18oC)		Dark (21oC)
Systematic	Normalized	Raw	Normalized	Raw	Normalized	Raw	Normalized	Raw	Normalized	Raw	Normalized	Raw	Normalized	Raw	Normalized	Raw	PrimaryAccession	UniRef based putative functional annotation	Chromosome	putative function	peptide ID	gene ID	CDS ID	transcript ID	MpMan bin	MapMan name	MapMan pep	MapMan description	GO: CC	GO: MF	GO: BP
CUST_22558_PI426222305	0.952657	222.86	0.996946	215.545	1.24471	322.846	2.88794	1053.75	2.5878	680.953	1.5063	434.173	0.812477	205.799	0.822881	193.465	PGSC0003DMT400078288	Cinnamic acid 4-hydroxylase	chr06	Cinnamic acid 4-hydroxylase	PGSC0003DMP400053024	PGSC0003DMG401030469	PGSC0003DMC400053024	PGSC0003DMT400078288	26.1	misc.cytochrome P450	pgsc0003dmp400053024	highly similar to ( 525) AT2G30490 | Symbols: ATC4H, C4H, CYP73A5 | C4H (CINNAMATE-4-HYDROXYLASE); trans-cinnamate 4-monooxygenase | chr2:12993861-12995683 REVERSEhighly similar to ( 539) TCMO_CATRO Trans-cinnamate 4-monooxygenase (EC 1.14.13.11) (Cinnamic acid 4-hydroxylase) (CA4H) (C4H) (P450C4H) (Cytochrome P450 73) - Catharanthus roseus (Rosy periwinkle) (Madagascar periwinkle)moderately simi…
CUST_24612_PI426222305	0.771633	26.8982	1.16518	37.7188	1.00053	36.3149	0.814531	43.6025	1.02246	39.3192	0.844232	35.4942	0.958161	38.8929	1.03386	35.1755	PGSC0003DMT400054488	Transcription factor	chr07	Transcription factor	PGSC0003DMP400036661	PGSC0003DMG400021146	PGSC0003DMC400036661	PGSC0003DMT400054488	35.2	not assigned.unknown	pgsc0003dmp400036661	PGSC0003DMT400054488
CUST_47122_PI426222305	0.786215	5.71757	1.61195	12.6454	0.664103	5.0832	118.964	1602.78	50.3705	423.315	12.1629	194.294	0.660487	5.32921	0.776385	5.81748	PGSC0003DMT400030430	Chalcone isomerase	chr05	Chalcone isomerase	PGSC0003DMP400020663	PGSC0003DMG400011655	PGSC0003DMC400020663	PGSC0003DMT400030430	16.8.2	secondary metabolism.flavonoids.chalcones	pgsc0003dmp400020663	moderately similar to ( 231) AT5G05270 | Symbols: | chalcone-flavanone isomerase family protein | chr5:1563543-1564827 FORWARDmoderately similar to ( 220) loc_os11g02440 12011.m28712 protein chalcone--flavonone isomerase, putative, expressedChalcone PGSC0003DMT400030430
CUST_5253_PI426222305	0.854363	6.59846	0.757052	5.14389	0.879509	7.58704	574.74	6974.09	447.318	3876.86	30.7013	303.917	0.593641	4.78804	0.832728	6.3425	PGSC0003DMT400009175	Flavanone 3 beta-hydroxylase	chr09	Flavanone 3 beta-hydroxylase	PGSC0003DMP400006359	PGSC0003DMG400003563	PGSC0003DMC400006359	PGSC0003DMT400009175	17.5.1	hormone metabolism.ethylene.synthesis-degradation	pgsc0003dmp400006359	highly similar to ( 591) AT3G51240 | Symbols: F3H, TT6, F3'H | F3H (FLAVANONE 3-HYDROXYLASE); naringenin 3-dioxygenase | chr3:19025409-19026658 FORWARDhighly similar to ( 626) FL3H_PETHY Naringenin,2-oxoglutarate 3-dioxygenase (EC 1.14.11.9) (Flavonone-3-hydroxylase) (F3H) (FHT) (Fragment) - Petunia hybrida (Petunia)highly similar to ( 543) loc_os04g56700 12004.m10557 protein naringenin,2-oxoglut…
CUST_51019_PI426222305	0.947771	4.3882	1.02532	4.33737	1.12414	5.89132	328.877	2687.44	235.467	1387.39	21.8491	155.561	0.873856	4.74078	0.95084	4.09193	PGSC0003DMT400062562	Anthocyanidin 3-O-glucosyltransferase	chr09	Anthocyanidin 3-O-glucosyltransferase	PGSC0003DMP400042123	PGSC0003DMG400024344	PGSC0003DMC400042123	PGSC0003DMT400062562	26.2	misc.UDP glucosyl and glucoronyl transferases	pgsc0003dmp400042123	moderately similar to ( 352) AT5G54010 | Symbols: | glycosyltransferase family protein | chr5:21919819-21921180 REVERSEhighly similar to ( 828) UFOG_PETHY Anthocyanidin 3-O-glucosyltransferase (EC 2.4.1.115) (Flavonol 3-O-glucosyltransferase) (UDP-glucose flavonoid 3-O-glucosyltransferase) (Anthocyanin rhamnosyl transferase) - Petunia hybrida (Petunia)moderately similar to ( 479) loc_os11g27370 1…
CUST_20030_PI426222305	1.03898	6.29807	1.00656	5.48628	0.831232	5.12171	5626.56	51904.5	5799.26	38987.5	245.708	2178.13	0.871223	5.63693	0.846706	4.81304	PGSC0003DMT400049165	Chalcone synthase 2	chr10	Chalcone synthase 2	PGSC0003DMP400033204	PGSC0003DMG400019110	PGSC0003DMC400033204	PGSC0003DMT400049165	16.8.2	secondary metabolism.flavonoids.chalcones	pgsc0003dmp400033204	highly similar to ( 692) AT5G13930 | Symbols: CHS, TT4, ATCHS | TT4 (TRANSPARENT TESTA 4); naringenin-chalcone synthase | chr5:4488762-4490035 FORWARDhighly similar to ( 792) CHS2_SOLTU Chalcone synthase 2 (EC 2.3.1.74) (Naringenin-chalcone synthase 2) - Solanum tuberosum (Potato)highly similar to ( 701) loc_os11g32650 12011.m07166 protein chalcone synthase, putative, expressedChal_sti_synt_N CHS…
CUST_48714_PI426222305	0.851959	10.8537	0.911411	15.0685	0.664156	9.01996	8.21508	222.164	5.74165	79.7865	4.54344	126.133	0.486019	6.60008	0.507966	6.34387	PGSC0003DMT400036283	Transcription factor R2R3-MYB		Transcription factor R2R3-MYB	PGSC0003DMP400024607	PGSC0003DMG400013965	PGSC0003DMC400024607	PGSC0003DMT400036283	27.3.25	RNA.regulation of transcription.MYB domain transcription factor family	pgsc0003dmp400024607	weakly similar to ( 137) AT1G66370 | Symbols: MYB113, AtMYB113 | MYB113 (myb domain protein 113); DNA binding / transcription factor | chr1:24753634-24754604 FORWARDweakly similar to ( 108) MYBC_MAIZE Anthocyanin regulatory C1 protein - Zea mays (Maize)weakly similar to ( 108) loc_os03g29614 12003.m08231 protein anthocyanin regulatory C1 protein, putative, expressed PGSC0003DMT400036283
CUST_10590_PI426222305	0.40406	6.94547	0.952321	15.6257	0.757178	13.1571	6.54575	277.36	3.32786	62.5139	3.56302	138.916	0.428728	8.96012	0.51942	9.87215	PGSC0003DMT400032139	BHLH transcription factor JAF13	chr08	BHLH transcription factor JAF13	PGSC0003DMP400021841	PGSC0003DMG401012339	PGSC0003DMC400021841	PGSC0003DMT400032139	27.3.6	RNA.regulation of transcription.bHLH,Basic Helix-Loop-Helix family	pgsc0003dmp400021841	moderately similar to ( 236) AT5G41315 | Symbols: GL3, MYC6.2 | GL3 (GLABROUS 3); protein binding / transcription factor | chr5:16529457-16532866 FORWARDweakly similar to ( 124) ARRS_MAIZE Anthocyanin regulatory R-S protein - Zea mays (Maize)weakly similar to ( 120) loc_os04g47040 12004.m09650 protein anthocyanin regulatory Lc protein, putative, expressed PGSC0003DMT400032139
CUST_48711_PI426222305	1.0293	133.067	1.15419	141.598	0.34985	47.0738	1.8549	370.086	2.38588	343.78	1.67827	263.994	0.29224	40.7184	0.137501	17.6148	PGSC0003DMT400036284	MYB transcription factor		MYB transcription factor	PGSC0003DMP400024608	PGSC0003DMG400013966	PGSC0003DMC400024608	PGSC0003DMT400036284	35.2	not assigned.unknown	pgsc0003dmp400024608	PGSC0003DMT400036284
CUST_30352_PI426222305	1.8422	15.0094	1.45149	11.6907	1.76817	14.4802	2.39253	142.324	0.828912	7.47115	1.53572	45.1919	0.606439	5.02284	0.642385	4.19702	PGSC0003DMT400069897	Anthocyanin 5-aromatic acyltransferase	chr05	Anthocyanin 5-aromatic acyltransferase	PGSC0003DMP400047231	PGSC0003DMG400027180	PGSC0003DMC400047231	PGSC0003DMT400069897	16.2	secondary metabolism.phenylpropanoids	pgsc0003dmp400047231	highly similar to ( 627) AT2G39980 | Symbols: | transferase family protein | chr2:16688437-16689885 REVERSEvery weakly similar to (94.0) HCBT1_DIACA Anthranilate N-benzoyltransferase protein 1 (EC 2.3.1.144) (Anthranilate N-hydroxycinnamoyl/benzoyltransferase 1) - Dianthus caryophyllus (Carnation) (Clove pink)moderately similar to ( 439) loc_os01g63480 12001.m12464 protein AER, putative, expresse…

## Sheet: Selected Carotenoid TableS11
Code ()*	WL6		Blue6		Red6		WL24		Blue24		Red24		Dark (18oC)		Dark (21oC)
Systematic	Normalized	Raw	Normalized	Raw	Normalized	Raw	Normalized	Raw	Normalized	Raw	Normalized	Raw	Normalized	Raw	Normalized	Raw	PrimaryAccession	UniRef based putative functional annotation	Chromosome	putative function	peptide ID	gene ID	CDS ID	transcript ID	MpMan bin	MapMan name	MapMan pep	MapMan description	GO: CC	GO: MF	GO: BP
CUST_9565_PI426222305	0.724848	8.53407	1.13817	12.7968	0.597439	7.16306	1.24835	24.2765	1.52751	20.1016	0.934773	13.2769	1.0715	13.6211	0.640607	7.82795	PGSC0003DMT400023666	Phytoene dehydrogenase, chloroplastic/chromoplastic	chr03	Phytoene dehydrogenase, chloroplastic/chromoplastic	PGSC0003DMP400016140	PGSC0003DMG400009156	PGSC0003DMC400016140	PGSC0003DMT400023666	16.1.4.1	secondary metabolism.isoprenoids.carotenoids.phytoene dehydrogenase	pgsc0003dmp400016140	highly similar to ( 968) AT4G14210 | Symbols: PDS3, PDS, PDE226 | PDS3 (PHYTOENE DESATURASE 3); phytoene dehydrogenase | chr4:8190426-8194769 REVERSEnearly identical (1099) CRTI_CAPAN Phytoene dehydrogenase, chloroplast precursor (EC 1.14.99.-) (Phytoene desaturase) - Capsicum annuum (Bell pepper)highly similar to ( 919) loc_os03g08570 12003.m06365 protein phytoene dehydrogenase, chloroplast prec…
CUST_9059_PI426222305	0.993474	582.973	1.36421	725.012	0.151129	90.373	3.64441	3188.8	4.20901	2674.69	1.86624	1324.52	0.0105837	5.40313	0.0121672	6.94069	PGSC0003DMT400061845	Phytoene synthase	chr03	Phytoene synthase 1, chloroplastic	PGSC0003DMP400041628	PGSC0003DMG400024063	PGSC0003DMC400041628	PGSC0003DMT400061845	16.1	secondary metabolism.isoprenoids.carotenoids.phytoene synthase	pgsc0003dmp400041628	highly similar to ( 543) AT5G17230 | Symbols: | phytoene synthase (PSY) / geranylgeranyl-diphosphate geranylgeranyl transferase | chr5:5659839-5662087 REVERSEhighly similar to ( 695) PSY_CAPAN Phytoene synthase, chloroplast precursor (EC 2.5.1.-) - Capsicum annuum (Bell pepper)highly similar to ( 511) loc_os06g51290 12006.m31943 protein phytoene synthase, chloroplast precursor, putative, expresse…
CUST_9025_PI426222305	0.941919	16.3151	1.23651	19.9327	0.305635	5.38437	5.11164	180.509	3.52205	70.6122	2.25418	67.6422	0.347756	6.7981	0.359992	6.33866	PGSC0003DMT400061846	Phytoene synthase 1, chloroplastic	chr03	Phytoene synthase 1, chloroplastic	PGSC0003DMP400041629	PGSC0003DMG400024063	PGSC0003DMC400041629	PGSC0003DMT400061846	16.1	secondary metabolism.isoprenoids.carotenoids.phytoene synthase	pgsc0003dmp400041629	highly similar to ( 587) AT5G17230 | Symbols: | phytoene synthase (PSY) / geranylgeranyl-diphosphate geranylgeranyl transferase | chr5:5659839-5662087 REVERSEhighly similar to ( 740) PSY_CAPAN Phytoene synthase, chloroplast precursor (EC 2.5.1.-) - Capsicum annuum (Bell pepper)highly similar to ( 552) loc_os06g51290 12006.m31943 protein phytoene synthase, chloroplast precursor, putative, expresse…
CUST_4785_PI426222305	0.859988	24.2497	1.217	31.6177	0.272084	7.88386	9.23192	438.234	7.35626	227.187	3.6228	128.77	0.198028	6.02509	0.335847	9.86208	PGSC0003DMT400027759	Violaxanthin de-epoxidase	chr04	Violaxanthin de-epoxidase	PGSC0003DMP400018909	PGSC0003DMG400010688	PGSC0003DMC400018909	PGSC0003DMT400027759	16.1	secondary metabolism.isoprenoids.carotenoids.violaxanthin de-epoxidase	pgsc0003dmp400018909	highly similar to ( 585) AT1G08550 | Symbols: NPQ1, AVDE1 | NPQ1 (NON-PHOTOCHEMICAL QUENCHING 1); violaxanthin de-epoxidase | chr1:2707462-2709387 FORWARDhighly similar to ( 565) loc_os04g31040 12004.m35285 protein violaxanthin de-epoxidase, putative, expressedVDE PGSC0003DMT400027759
CUST_4692_PI426222305	1.08714	28.7743	1.4822	38.2666	0.352453	10.2466	10.747	493.149	8.00452	225.483	4.05314	136.41	0.376789	11.3754	0.43299	11.4445	PGSC0003DMT400027760	Violaxanthin de-epoxidase	chr04	Violaxanthin de-epoxidase	PGSC0003DMP400018910	PGSC0003DMG400010688	PGSC0003DMC400018910	PGSC0003DMT400027760	16.1	secondary metabolism.isoprenoids.carotenoids.violaxanthin de-epoxidase	pgsc0003dmp400018910	highly similar to ( 587) AT1G08550 | Symbols: NPQ1, AVDE1 | NPQ1 (NON-PHOTOCHEMICAL QUENCHING 1); violaxanthin de-epoxidase | chr1:2707462-2709387 FORWARDhighly similar to ( 565) loc_os04g31040 12004.m35285 protein violaxanthin de-epoxidase, putative, expressedVDE PGSC0003DMT400027760
CUST_4792_PI426222305	0.847733	28.1848	1.09327	36.7299	0.262067	9.24737	6.53318	314.007	6.76771	237.35	2.17637	83.1647	0.257721	10.0585	0.330754	11.0835	PGSC0003DMT400054129	Violaxanthin de-epoxidase	chr04	Violaxanthin de-epoxidase	PGSC0003DMP400036443	PGSC0003DMG400020993	PGSC0003DMC400036443	PGSC0003DMT400054129	16.1	secondary metabolism.isoprenoids.carotenoids.violaxanthin de-epoxidase	pgsc0003dmp400036443	weakly similar to ( 179) AT1G08550 | Symbols: NPQ1, AVDE1 | NPQ1 (NON-PHOTOCHEMICAL QUENCHING 1); violaxanthin de-epoxidase | chr1:2707462-2709387 FORWARDweakly similar to ( 178) loc_os04g31040 12004.m35285 protein violaxanthin de-epoxidase, putative, expressedVDE PGSC0003DMT400054129
CUST_17351_PI426222305	0.821418	12.5405	0.912166	12.0492	0.532186	8.52413	2.07328	58.7516	2.5867	39.2625	1.47545	37.1194	0.736919	10.9302	0.868532	12.5252	PGSC0003DMT400057865	Zeta-carotene desaturase	chr01	Zeta-carotene desaturase	PGSC0003DMP400038959	PGSC0003DMG400022473	PGSC0003DMC400038959	PGSC0003DMT400057865	16.1	secondary metabolism.isoprenoids.carotenoids.zeta-carotene desaturase	pgsc0003dmp400038959	highly similar to ( 957) AT3G04870 | Symbols: ZDS, PDE181 | ZDS (ZETA-CAROTENE DESATURASE); carotene 7,8-desaturase | chr3:1342842-1346189 FORWARDnearly identical (1167) ZDS_CAPAN Zeta-carotene desaturase, chloroplast precursor (EC 1.14.99.30) (Carotene 7,8-desaturase) - Capsicum annuum (Bell pepper)highly similar to ( 963) loc_os07g10490 12007.m05504 protein zeta-carotene desaturase, chloroplast…
CUST_38469_PI426222305	0.796302	9.98051	1.00035	13.2326	0.705855	10.1795	11.9761	243.962	9.19289	128.792	2.47728	38.8202	0.609457	9.43562	0.48766	6.17562	PGSC0003DMT400074346	Beta-carotene hydroxylase		Beta-carotene hydroxylase	PGSC0003DMP400050348	PGSC0003DMG400028897	PGSC0003DMC400050348	PGSC0003DMT400074346	16.1	secondary metabolism.isoprenoids.carotenoids.carotenoid beta ring hydroxylase	pgsc0003dmp400050348	moderately similar to ( 376) AT4G25700 | Symbols: BETA-OHASE 1, B1, chy1 | BETA-OHASE 1 (BETA-HYDROXYLASE 1); carotene beta-ring hydroxylase | chr4:13094965-13095866 REVERSEmoderately similar to ( 332) loc_os03g03370 12003.m34991 protein beta-carotene hydroxylase, putative, expressed PGSC0003DMT400074346
CUST_18568_PI426222305	0.62724	79.6683	0.860124	102.472	0.684774	92.5788	2.08324	425.405	2.23019	309.689	1.38386	210.996	0.650689	89.8034	1.01551	126.927	PGSC0003DMT400043103	Phytoene synthase 2	chr03	Phytoene synthase 2	PGSC0003DMP400029241	PGSC0003DMG400016721	PGSC0003DMC400029241	PGSC0003DMT400043103	16.1	secondary metabolism.isoprenoids.carotenoids.phytoene synthase	pgsc0003dmp400029241	highly similar to ( 602) AT5G17230 | Symbols: | phytoene synthase (PSY) / geranylgeranyl-diphosphate geranylgeranyl transferase | chr5:5659839-5662087 REVERSEhighly similar to ( 698) PSY_CAPAN Phytoene synthase, chloroplast precursor (EC 2.5.1.-) - Capsicum annuum (Bell pepper)highly similar to ( 571) loc_os06g51290 12006.m31943 protein phytoene synthase, chloroplast precursor, putative, expresse…
CUST_18576_PI426222305	0.885532	260.941	1.01232	278.134	0.873792	277.543	1.98168	900.425	2.54338	834.247	1.29465	470.659	0.746974	240.33	1.15753	341.914	PGSC0003DMT400043102	Phytoene synthase 2	chr02	Phytoene synthase 2	PGSC0003DMP400029240	PGSC0003DMG400016721	PGSC0003DMC400029240	PGSC0003DMT400043102	16.1	secondary metabolism.isoprenoids.carotenoids.phytoene synthase	pgsc0003dmp400029240	highly similar to ( 561) AT5G17230 | Symbols: | phytoene synthase (PSY) / geranylgeranyl-diphosphate geranylgeranyl transferase | chr5:5659839-5662087 REVERSEhighly similar to ( 654) PSY_CAPAN Phytoene synthase, chloroplast precursor (EC 2.5.1.-) - Capsicum annuum (Bell pepper)highly similar to ( 528) loc_os06g51290 12006.m31943 protein phytoene synthase, chloroplast precursor, putative, expresse…
CUST_50238_PI426222305	0.614388	18.799	0.905326	23.8248	0.590848	17.9133	1.38935	71.9778	1.37342	43.5961	1.22068	45.9813	0.755147	23.3488	1.00936	29.6271	PGSC0003DMT400080158	Conserved gene of unknown function	chr04	Conserved gene of unknown function	PGSC0003DMP400054371	PGSC0003DMG400031203	PGSC0003DMC400054371	PGSC0003DMT400080158	16.1	secondary metabolism.isoprenoids.carotenoids.violaxanthin de-epoxidase	pgsc0003dmp400054371	moderately similar to ( 358) AT2G21860 | Symbols: | violaxanthin de-epoxidase-related | chr2:9318333-9319990 REVERSEmoderately similar to ( 296) loc_os01g51860 12001.m42522 protein violaxanthin de-epoxidase family protein, expressed PGSC0003DMT400080158
CUST_45281_PI426222305	0.824839	83.0934	1.28692	121.308	0.992854	104.75	2.63716	458.252	1.91764	216.418	1.35603	169.89	0.771618	84.6698	0.877556	88.2384	PGSC0003DMT400027593	Lycopene beta cyclase, chloroplastic	chr04	Lycopene beta cyclase, chloroplastic	PGSC0003DMP400018798	PGSC0003DMG400010637	PGSC0003DMC400018798	PGSC0003DMT400027593	16.1	secondary metabolism.isoprenoids.carotenoids.lycopene beta cyclase	pgsc0003dmp400018798	highly similar to ( 787) AT3G10230 | Symbols: LYC | LYC (LYCOPENE CYCLASE); lycopene beta cyclase | chr3:3164340-3165449 REVERSEhighly similar to ( 940) LCYB_CAPAN Lycopene beta cyclase, chloroplast precursor (EC 1.14.-.-) - Capsicum annuum (Bell pepper)highly similar to ( 663) loc_os02g09750 12002.m06272 protein lycopene beta cyclase, chloroplast precursor, putative, expressedLycopene_cycl FixC …
CUST_51452_PI426222305	0.640141	11.1295	1.02048	15.6221	0.629602	11.6515	2.67868	146.581	1.28004	24.2597	2.02233	65.9717	0.77545	13.9557	0.984973	16.2017	PGSC0003DMT400054038	Conserved gene of unknown function	chr04	Conserved gene of unknown function	PGSC0003DMP400036392	PGSC0003DMG400020963	PGSC0003DMC400036392	PGSC0003DMT400054038	16.1	secondary metabolism.isoprenoids.carotenoids.violaxanthin de-epoxidase	pgsc0003dmp400036392	moderately similar to ( 362) AT2G21860 | Symbols: | violaxanthin de-epoxidase-related | chr2:9318333-9319990 REVERSEmoderately similar to ( 301) loc_os01g51860 12001.m42522 protein violaxanthin de-epoxidase family protein, expressed PGSC0003DMT400054038
CUST_4723_PI426222305	0.70584	10.2405	2.15883	35.6742	0.393408	5.31406	12.5316	706.641	3.7173	57.3233	5.05663	261.129	0.380304	5.45751	0.379134	4.6331	PGSC0003DMT400027762	Violaxanthin de-epoxidase	chr04	Violaxanthin de-epoxidase	PGSC0003DMP400018911	PGSC0003DMG400010690	PGSC0003DMC400018911	PGSC0003DMT400027762	16.1	secondary metabolism.isoprenoids.carotenoids.violaxanthin de-epoxidase	pgsc0003dmp400018911	moderately similar to ( 286) AT1G08550 | Symbols: NPQ1, AVDE1 | NPQ1 (NON-PHOTOCHEMICAL QUENCHING 1); violaxanthin de-epoxidase | chr1:2707462-2709387 FORWARDmoderately similar to ( 286) loc_os04g31040 12004.m35285 protein violaxanthin de-epoxidase, putative, expressedVDE PGSC0003DMT400027762
CUST_19248_PI426222305	0.972083	5.3169	2.36654	15.6692	0.802682	4.32443	6.5342	375.122	2.60685	18.0689	4.68164	210.95	0.7735	4.60775	0.917493	4.79479	PGSC0003DMT400064584	All-trans-retinol 13,14-reductase	chr05	All-trans-retinol 13,14-reductase	PGSC0003DMP400043541	PGSC0003DMG400025098	PGSC0003DMC400043541	PGSC0003DMT400064584	16.1	secondary metabolism.isoprenoids.carotenoids	pgsc0003dmp400043541	moderately similar to ( 333) AT1G57770 | Symbols: | amine oxidase family | chr1:21395254-21398135 FORWARDweakly similar to ( 101) CRTSO_DAUCA Carotenoid isomerase, chloroplast precursor (EC 5.-.-.-) (CrtISO) - Daucus carota (Carrot)moderately similar to ( 320) loc_os03g62510 12003.m101560 protein carotenoid isomerase 1, chloroplast precursor, putative, expressedCOG1233 PGSC0003DMT400064584
CUST_9309_PI426222305	1.09013	10.0842	1.56814	13.3089	0.880153	8.43676	2.17797	124.698	1.18479	12.5442	2.21038	76.3476	0.771189	8.08344	0.552923	4.53002	PGSC0003DMT400023671	Phytoene desaturase	chr03	Phytoene dehydrogenase, chloroplastic/chromoplastic	PGSC0003DMP400016143	PGSC0003DMG400009156	PGSC0003DMC400016143	PGSC0003DMT400023671	16.1.4.21	secondary metabolism.isoprenoids.carotenoids.phytoene dehydrogenase	pgsc0003dmp400016143	weakly similar to ( 120) AT4G14210 | Symbols: PDS3, PDS, PDE226 | PDS3 (PHYTOENE DESATURASE 3); phytoene dehydrogenase | chr4:8190426-8194769 REVERSEweakly similar to ( 125) CRTI_CAPAN Phytoene dehydrogenase, chloroplast precursor (EC 1.14.99.-) (Phytoene desaturase) - Capsicum annuum (Bell pepper)weakly similar to ( 117) loc_os03g08570 12003.m06365 protein phytoene dehydrogenase, chloroplast pre…
CUST_2558_PI426222305	0.917913	17.6252	1.39729	22.7566	0.712037	14.709	3.06903	245.825	0.822403	15.5164	2.21549	108.965	0.551189	10.1309	0.721075	12.7163	PGSC0003DMT400072543	Carotenoid isomerase, chloroplastic	chr10	Carotenoid isomerase, chloroplastic	PGSC0003DMP400049062	PGSC0003DMG400028224	PGSC0003DMC400049062	PGSC0003DMT400072543	16.1	secondary metabolism.isoprenoids.carotenoids.carotenoid isomerase	pgsc0003dmp400049062	highly similar to ( 919) AT1G06820 | Symbols: CRTISO, CCR2 | CRTISO (CAROTENOID ISOMERASE); carotenoid isomerase | chr1:2093145-2096220 REVERSEhighly similar to ( 908) CRTSO_DAUCA Carotenoid isomerase, chloroplast precursor (EC 5.-.-.-) (CrtISO) - Daucus carota (Carrot)highly similar to ( 891) loc_os11g36440 12011.m07496 protein carotenoid isomerase, chloroplast precursor, putative, expressedCOG1…
CUST_9189_PI426222305	0.992467	4.83702	3.76198	23.4921	1.19497	6.39549	3.92513	383.225	1.16995	7.05213	4.42938	213.311	0.942633	5.15471	1.02008	4.96717	PGSC0003DMT400023670	Phytoene desaturase	chr03	Phytoene dehydrogenase, chloroplastic/chromoplastic	PGSC0003DMP400016142	PGSC0003DMG400009156	PGSC0003DMC400016142	PGSC0003DMT400023670	16.1	secondary metabolism.isoprenoids.carotenoids.phytoene dehydrogenase	pgsc0003dmp400016142	weakly similar to ( 117) AT4G14210 | Symbols: PDS3, PDS, PDE226 | PDS3 (PHYTOENE DESATURASE 3); phytoene dehydrogenase | chr4:8190426-8194769 REVERSEweakly similar to ( 143) CRTI_CAPAN Phytoene dehydrogenase, chloroplast precursor (EC 1.14.99.-) (Phytoene desaturase) - Capsicum annuum (Bell pepper)weakly similar to ( 114) loc_os03g08570 12003.m06365 protein phytoene dehydrogenase, chloroplast pre…
CUST_22946_PI426222305	0.876433	30.6276	1.70351	57.0452	0.951043	34.7265	1.78152	134.511	0.922307	36.272	1.66023	74.4792	0.97778	37.2782	0.71614	25.1299	PGSC0003DMT400021074	Lycopene beta cyclase, chloroplastic	chr10	Lycopene beta cyclase, chloroplastic	PGSC0003DMP400014351	PGSC0003DMG400008159	PGSC0003DMC400014351	PGSC0003DMT400021074	16.1	secondary metabolism.isoprenoids.carotenoids.lycopene beta cyclase	pgsc0003dmp400014351	highly similar to ( 783) AT3G10230 | Symbols: LYC | LYC (LYCOPENE CYCLASE); lycopene beta cyclase | chr3:3164340-3165449 REVERSEhighly similar to ( 899) LCYB_TOBAC Lycopene beta cyclase, chloroplast precursor (EC 1.14.-.-) - Nicotiana tabacum (Common tobacco)highly similar to ( 669) loc_os02g09750 12002.m06272 protein lycopene beta cyclase, chloroplast precursor, putative, expressedLycopene_cycl …
CUST_19402_PI426222305	1.01898	3.93859	2.90711	15.506	0.974956	4.15673	3.97155	261.942	0.913512	4.21577	3.43597	120.125	0.939512	4.48026	1.05675	4.63946	PGSC0003DMT400064586	All-trans-retinol 13,14-reductase	chr05	All-trans-retinol 13,14-reductase	PGSC0003DMP400043543	PGSC0003DMG400025098	PGSC0003DMC400043543	PGSC0003DMT400064586	16.1	secondary metabolism.isoprenoids.carotenoids	pgsc0003dmp400043543	highly similar to ( 676) AT1G57770 | Symbols: | amine oxidase family | chr1:21395254-21398135 FORWARDweakly similar to ( 167) CRTSO_DAUCA Carotenoid isomerase, chloroplast precursor (EC 5.-.-.-) (CrtISO) - Daucus carota (Carrot)highly similar to ( 645) loc_os03g62510 12003.m101560 protein carotenoid isomerase 1, chloroplast precursor, putative, expressedCOG1233 PGSC0003DMT400064586
CUST_5325_PI426222305	1.01844	3.93297	1.10178	4.21076	0.974441	4.12201	1.72611	32.5141	0.913029	4.18794	2.07296	28.5378	1.22268	6.56655	1.10347	4.67746	PGSC0003DMT400009007	Phytoene dehydrogenase	chr02	Phytoene dehydrogenase	PGSC0003DMP400006233	PGSC0003DMG402003505	PGSC0003DMC400006233	PGSC0003DMT400009007	16.1.4	secondary metabolism.isoprenoids.carotenoids	pgsc0003dmp400006233	very weakly similar to (82.0) AT5G49555 | Symbols: | amine oxidase-related | chr5:20107411-20110602 REVERSE PGSC0003DMT400009007
CUST_3595_PI426222305	0.9834	4.79595	1.12424	5.06328	1.09958	5.9252	2.46581	67.9042	1.0739	6.33637	2.17615	33.101	1.41622	8.01713	0.995508	4.59033	PGSC0003DMT400010287	Zeaxanthin epoxidase, chloroplastic	chr10	Zeaxanthin epoxidase, chloroplastic	PGSC0003DMP400007171	PGSC0003DMG400004020	PGSC0003DMC400007171	PGSC0003DMT400010287	16.1.4.5	hormone metabolism.abscisic acid.synthesis-degradation.synthesis.zeaxanthin epoxidase	pgsc0003dmp400007171	highly similar to ( 877) AT5G67030 | Symbols: ABA1, LOS6, NPQ2, ATABA1, ZEP, IBS3, ATZEP | ABA1 (ABA DEFICIENT 1); zeaxanthin epoxidase | chr5:26754026-26757090 REVERSEnearly identical (1163) ABA2_NICPL Zeaxanthin epoxidase, chloroplast precursor (EC 1.14.13.90) - Nicotiana plumbaginifolia (Leadwort-leaved tobacco)highly similar to ( 865) loc_os04g37619 12004.m35575 protein zeaxanthin epoxidase, …
CUST_52353_PI426222305	1.12059	4.82727	1.11751	4.10077	1.01385	4.49017	1.96027	44.5608	0.926071	4.13781	2.03977	26.225	0.952427	4.34794	1.03633	3.91406	PGSC0003DMT400011561	Conserved gene of unknown function		Conserved gene of unknown function	PGSC0003DMP400008028	PGSC0003DMG400004546	PGSC0003DMC400008028	PGSC0003DMT400011561	16.1.4.1	secondary metabolism.isoprenoids.carotenoids.violaxanthin de-epoxidase	pgsc0003dmp400008028	moderately similar to ( 272) AT2G21860 | Symbols: | violaxanthin de-epoxidase-related | chr2:9318333-9319990 REVERSEmoderately similar to ( 270) loc_os01g51860 12001.m42522 protein violaxanthin de-epoxidase family protein, expressed PGSC0003DMT400011561
CUST_52351_PI426222305	1.17098	5.59921	1.33578	6.28165	0.925784	4.11633	4.23942	288.394	0.886473	4.79256	3.88535	91.98	0.957728	4.82503	1.32444	6.63743	PGSC0003DMT400011560	Conserved gene of unknown function		Conserved gene of unknown function	PGSC0003DMP400008027	PGSC0003DMG400004546	PGSC0003DMC400008027	PGSC0003DMT400011560	17.1.1.1.1	secondary metabolism.isoprenoids.carotenoids.violaxanthin de-epoxidase	pgsc0003dmp400008027	weakly similar to ( 139) AT2G21860 | Symbols: | violaxanthin de-epoxidase-related | chr2:9318333-9319990 REVERSEvery weakly similar to ( 100) loc_os01g51860 12001.m42522 protein violaxanthin de-epoxidase family protein, expressed PGSC0003DMT400011560
CUST_3818_PI426222305	1.04032	4.51378	1.28911	5.70238	1.00067	4.65755	2.46662	84.9013	0.932642	4.76034	2.53887	47.5654	0.961326	4.78663	1.04369	4.54546	PGSC0003DMT400005644	Conserved gene of unknown function	chr04	Conserved gene of unknown function	PGSC0003DMP400003943	PGSC0003DMG400002212	PGSC0003DMC400003943	PGSC0003DMT400005644	16.1.4.8	secondary metabolism.isoprenoids	pgsc0003dmp400003943	moderately similar to ( 393) AT3G11950 | Symbols: | prenyltransferase/ zinc ion binding | chr3:3783273-3785098 REVERSEmoderately similar to ( 298) loc_os05g23950 12005.m06689 protein prenyltransferase/ zinc ion binding protein, putative, expressed PGSC0003DMT400005644
CUST_2384_PI426222305	1.1018	15.9162	1.32138	16.9196	0.786331	12.8954	3.25026	326.528	0.943127	15.0068	2.94426	140.599	1.00177	15.6922	0.48115	6.40462	PGSC0003DMT400072542	Carotenoid isomerase, chloroplastic	chr10	Carotenoid isomerase, chloroplastic	PGSC0003DMP400049061	PGSC0003DMG400028224	PGSC0003DMC400049061	PGSC0003DMT400072542	16.1	secondary metabolism.isoprenoids.carotenoids.carotenoid isomerase	pgsc0003dmp400049061	highly similar to ( 541) AT1G06820 | Symbols: CRTISO, CCR2 | CRTISO (CAROTENOID ISOMERASE); carotenoid isomerase | chr1:2093145-2096220 REVERSEhighly similar to ( 540) CRTSO_DAUCA Carotenoid isomerase, chloroplast precursor (EC 5.-.-.-) (CrtISO) - Daucus carota (Carrot)highly similar to ( 525) loc_os11g36440 12011.m07496 protein carotenoid isomerase, chloroplast precursor, putative, expressedCOG1…
CUST_45011_PI426222305	1.19367	5.65908	1.22581	5.45202	0.998089	4.75754	2.00336	45.574	0.932353	4.84683	1.73456	17.3335	0.996017	5.03446	1.07133	4.99623	PGSC0003DMT400014068	Ascorbate oxidase	chr04	Ascorbate oxidase	PGSC0003DMP400009720	PGSC0003DMG400005515	PGSC0003DMC400009720	PGSC0003DMT400014068	16.1.4.21	secondary metabolism.simple phenols	pgsc0003dmp400009720	highly similar to ( 808) AT4G39830 | Symbols: | L-ascorbate oxidase, putative | chr4:18479103-18481184 FORWARDhighly similar to ( 586) ASO_CUCMA L-ascorbate oxidase precursor (EC 1.10.3.3) (Ascorbase) (ASO) - Cucurbita maxima (Pumpkin) (Winter squash)highly similar to ( 728) loc_os09g20090 12009.m05216 protein L-ascorbate oxidase precursor, putative, expressedSufI Cu-oxidase_3 Cu-oxidase Cu-oxida…
CUST_42911_PI426222305	0.991531	4.79982	1.1621	5.2806	1.16751	6.36958	2.08157	33.2165	0.945405	5.26438	1.86035	23.5275	1.01798	5.60917	1.00185	4.85432	PGSC0003DMT400058487	L-ascorbate oxidase	chr01	L-ascorbate oxidase	PGSC0003DMP400039387	PGSC0003DMG400022713	PGSC0003DMC400039387	PGSC0003DMT400058487	16.1.4	secondary metabolism.simple phenols	pgsc0003dmp400039387	highly similar to ( 736) AT5G21105 | Symbols: | L-ascorbate oxidase/ copper ion binding / oxidoreductase | chr5:7174321-7177409 FORWARDhighly similar to ( 885) ASO_TOBAC L-ascorbate oxidase precursor (EC 1.10.3.3) (Ascorbase) (ASO) - Nicotiana tabacum (Common tobacco)highly similar to ( 712) loc_os06g37080 12006.m08243 protein L-ascorbate oxidase precursor, putative, expressedSufI Cu-oxidase_3 Cu…
CUST_37173_PI426222305	1.01844	4.65488	1.51787	7.38262	0.988941	4.98877	2.13546	59.6879	0.947048	5.18647	2.54115	50.8217	1.20053	6.56918	1.02442	4.78283	PGSC0003DMT400041360	Conserved gene of unknown function	chr04	Conserved gene of unknown function	PGSC0003DMP400028032	PGSC0003DMG400016019	PGSC0003DMC400028032	PGSC0003DMT400041360	16.1	secondary metabolism.isoprenoids	pgsc0003dmp400028032	moderately similar to ( 380) AT3G11950 | Symbols: | prenyltransferase/ zinc ion binding | chr3:3783273-3785098 REVERSEmoderately similar to ( 280) loc_os05g23950 12005.m06689 protein prenyltransferase/ zinc ion binding protein, putative, expressed PGSC0003DMT400041360
CUST_19280_PI426222305	1.02589	4.66823	1.33256	6.06858	0.992651	4.83679	2.48592	53.0436	0.914428	4.92434	2.61361	55.5373	1.16626	6.24148	1.05267	4.98445	PGSC0003DMT400064583	All-trans-retinol 13,14-reductase	chr05	All-trans-retinol 13,14-reductase	PGSC0003DMP400043540	PGSC0003DMG400025098	PGSC0003DMC400043540	PGSC0003DMT400064583	16.1.4.5	secondary metabolism.isoprenoids.carotenoids	pgsc0003dmp400043540	moderately similar to ( 415) AT1G57770 | Symbols: | amine oxidase family | chr1:21395254-21398135 FORWARDweakly similar to ( 122) CRTSO_DAUCA Carotenoid isomerase, chloroplast precursor (EC 5.-.-.-) (CrtISO) - Daucus carota (Carrot)moderately similar to ( 392) loc_os03g62510 12003.m101560 protein carotenoid isomerase 1, chloroplast precursor, putative, expressedCOG1233 PGSC0003DMT400064583
CUST_3567_PI426222305	0.980362	4.27362	1.22063	5.73759	1.0506	5.1926	1.6236	22.1575	0.87889	4.54237	1.70079	18.8862	0.946615	5.07251	1.01433	4.6811	PGSC0003DMT400010288	Zeaxanthin epoxidase, chloroplastic	chr02	Zeaxanthin epoxidase, chloroplastic	PGSC0003DMP400007172	PGSC0003DMG400004020	PGSC0003DMC400007172	PGSC0003DMT400010288	16.1.4	hormone metabolism.abscisic acid.synthesis-degradation.synthesis.zeaxanthin epoxidase	pgsc0003dmp400007172	weakly similar to ( 132) AT5G67030 | Symbols: ABA1, LOS6, NPQ2, ATABA1, ZEP, IBS3, ATZEP | ABA1 (ABA DEFICIENT 1); zeaxanthin epoxidase | chr5:26754026-26757090 REVERSEmoderately similar to ( 224) ABA2_NICPL Zeaxanthin epoxidase, chloroplast precursor (EC 1.14.13.90) - Nicotiana plumbaginifolia (Leadwort-leaved tobacco)weakly similar to ( 126) loc_os04g37619 12004.m35575 protein zeaxanthin epoxid…
CUST_19301_PI426222305	1.03299	4.47825	2.07839	10.0964	0.989176	4.42041	3.37492	210.444	0.941987	4.76283	4.07948	112.46	0.952427	4.84759	1.03633	4.15453	PGSC0003DMT400064585	All-trans-retinol 13,14-reductase	chr05	All-trans-retinol 13,14-reductase	PGSC0003DMP400043542	PGSC0003DMG400025098	PGSC0003DMC400043542	PGSC0003DMT400064585	16.1	secondary metabolism.isoprenoids.carotenoids	pgsc0003dmp400043542	highly similar to ( 886) AT1G57770 | Symbols: | amine oxidase family | chr1:21395254-21398135 FORWARDweakly similar to ( 181) CRTSO_DAUCA Carotenoid isomerase, chloroplast precursor (EC 5.-.-.-) (CrtISO) - Daucus carota (Carrot)highly similar to ( 847) loc_os03g62510 12003.m101560 protein carotenoid isomerase 1, chloroplast precursor, putative, expressedCOG1233 PGSC0003DMT400064585
CUST_42887_PI426222305	1.01844	3.82806	1.10178	4.00334	0.974441	3.91483	1.7374	32.9928	1.09332	5.63195	2.13975	18.944	0.939015	4.2427	1.02174	3.80228	PGSC0003DMT400058486	L-ascorbate oxidase	chr01	L-ascorbate oxidase	PGSC0003DMP400039386	PGSC0003DMG400022713	PGSC0003DMC400039386	PGSC0003DMT400058486	16.1.4.2	secondary metabolism.simple phenols	pgsc0003dmp400039386	moderately similar to ( 500) AT5G21105 | Symbols: | L-ascorbate oxidase/ copper ion binding / oxidoreductase | chr5:7174321-7177409 FORWARDhighly similar to ( 606) ASO_TOBAC L-ascorbate oxidase precursor (EC 1.10.3.3) (Ascorbase) (ASO) - Nicotiana tabacum (Common tobacco)moderately similar to ( 467) loc_os06g37080 12006.m08243 protein L-ascorbate oxidase precursor, putative, expressedSufI Cu-oxid…
CUST_3990_PI426222305	0.991942	4.8273	1.08603	4.85056	1.03343	5.32888	1.47331	24.1798	1.03403	5.94242	2.05884	20.1018	0.948102	5.26247	0.980197	4.53925	PGSC0003DMT400049859	Phytoene synthase 2, chloroplastic	chr12	Phytoene synthase 2, chloroplastic	PGSC0003DMP400033655	PGSC0003DMG400019372	PGSC0003DMC400033655	PGSC0003DMT400049859	16.1.4.2	secondary metabolism.isoprenoids.carotenoids.phytoene synthase	pgsc0003dmp400033655	moderately similar to ( 243) AT5G17230 | Symbols: | phytoene synthase (PSY) / geranylgeranyl-diphosphate geranylgeranyl transferase | chr5:5659839-5662087 REVERSEmoderately similar to ( 254) PSY_CAPAN Phytoene synthase, chloroplast precursor (EC 2.5.1.-) - Capsicum annuum (Bell pepper)moderately similar to ( 244) loc_os06g51290 12006.m31943 protein phytoene synthase, chloroplast precursor, putati…
CUST_2354_PI426222305	0.743845	12.0442	1.01571	18.1686	0.745297	12.4537	2.94268	308.794	1.05098	20.2933	3.17234	103.986	0.924503	19.0142	0.918618	15.4355	PGSC0003DMT400072541	Carotenoid isomerase, chloroplastic	chr10	Carotenoid isomerase, chloroplastic	PGSC0003DMP400049060	PGSC0003DMG400028224	PGSC0003DMC400049060	PGSC0003DMT400072541	16.1	secondary metabolism.isoprenoids.carotenoids.carotenoid isomerase	pgsc0003dmp400049060	highly similar to ( 757) AT1G06820 | Symbols: CRTISO, CCR2 | CRTISO (CAROTENOID ISOMERASE); carotenoid isomerase | chr1:2093145-2096220 REVERSEhighly similar to ( 743) CRTSO_DAUCA Carotenoid isomerase, chloroplast precursor (EC 5.-.-.-) (CrtISO) - Daucus carota (Carrot)highly similar to ( 741) loc_os11g36440 12011.m07496 protein carotenoid isomerase, chloroplast precursor, putative, expressedCOG1…
CUST_49185_PI426222305	0.787907	7.37507	1.67175	17.2284	1.1291	11.5101	1.1719	69.2269	1.01443	13.2249	1.74066	37.5556	0.885476	9.62671	1.37847	13.3657	PGSC0003DMT400071761	Ascorbate oxidase	chr04	Ascorbate oxidase	PGSC0003DMP400048540	PGSC0003DMG400027914	PGSC0003DMC400048540	PGSC0003DMT400071761	16.1	secondary metabolism.simple phenols	pgsc0003dmp400048540	highly similar to ( 711) AT4G39830 | Symbols: | L-ascorbate oxidase, putative | chr4:18479103-18481184 FORWARDhighly similar to ( 508) ASO_TOBAC L-ascorbate oxidase precursor (EC 1.10.3.3) (Ascorbase) (ASO) - Nicotiana tabacum (Common tobacco)highly similar to ( 646) loc_os09g20090 12009.m05216 protein L-ascorbate oxidase precursor, putative, expressedSufI Cu-oxidase Cu-oxidase_2 Cu-oxidase_3 PGS…
CUST_49178_PI426222305	0.5349	6.84028	1.10144	13.7564	0.825865	11.8258	0.996539	63.1402	0.650983	11.7785	1.55618	43.1555	0.933025	14.006	1.15873	14.3668	PGSC0003DMT400071762	Ascorbate oxidase	chr04	Ascorbate oxidase	PGSC0003DMP400048541	PGSC0003DMG400027914	PGSC0003DMC400048541	PGSC0003DMT400071762	16.1	secondary metabolism.simple phenols	pgsc0003dmp400048541	highly similar to ( 605) AT4G39830 | Symbols: | L-ascorbate oxidase, putative | chr4:18479103-18481184 FORWARDmoderately similar to ( 427) ASO_CUCMA L-ascorbate oxidase precursor (EC 1.10.3.3) (Ascorbase) (ASO) - Cucurbita maxima (Pumpkin) (Winter squash)highly similar to ( 537) loc_os09g20090 12009.m05216 protein L-ascorbate oxidase precursor, putative, expressedCu-oxidase Cu-oxidase_2 SufI PGSC…
CUST_44995_PI426222305	1.16582	7.69706	1.88959	15.2484	1.12183	7.97893	1.76806	74.2178	0.796066	5.77688	2.7856	55.7789	1.10461	9.38392	1.00888	6.5168	PGSC0003DMT400014067	Ascorbate oxidase	chr04	Ascorbate oxidase	PGSC0003DMP400009719	PGSC0003DMG400005515	PGSC0003DMC400009719	PGSC0003DMT400014067	16.1	secondary metabolism.simple phenols	pgsc0003dmp400009719	moderately similar to ( 437) AT4G39830 | Symbols: | L-ascorbate oxidase, putative | chr4:18479103-18481184 FORWARDmoderately similar to ( 318) ASO_TOBAC L-ascorbate oxidase precursor (EC 1.10.3.3) (Ascorbase) (ASO) - Nicotiana tabacum (Common tobacco)moderately similar to ( 389) loc_os09g20090 12009.m05216 protein L-ascorbate oxidase precursor, putative, expressedCu-oxidase_2 PGSC0003DMT400014067
CUST_40635_PI426222305	1.03464	59.2187	1.42975	75.2524	0.955125	56.8882	1.09736	207.247	0.551982	35.2767	1.52084	120.193	0.873558	54.8261	1.14428	67.7828	PGSC0003DMT400056433	Phytoene synthase 2, chloroplastic	chr02	Phytoene synthase 2, chloroplastic	PGSC0003DMP400037967	PGSC0003DMG400021926	PGSC0003DMC400037967	PGSC0003DMT400056433	16.1	secondary metabolism.isoprenoids.carotenoids.phytoene synthase	pgsc0003dmp400037967	weakly similar to ( 160) AT5G17230 | Symbols: | phytoene synthase (PSY) / geranylgeranyl-diphosphate geranylgeranyl transferase | chr5:5659839-5662087 REVERSEweakly similar to ( 178) PSY_CAPAN Phytoene synthase, chloroplast precursor (EC 2.5.1.-) - Capsicum annuum (Bell pepper)weakly similar to ( 158) loc_os06g51290 12006.m31943 protein phytoene synthase, chloroplast precursor, putative, expresse…
CUST_49183_PI426222305	0.606117	5.6179	1.18788	13.4297	1.60864	16.7402	1.10629	62.9105	0.872483	10.9513	1.64402	47.4075	0.875265	9.84734	1.19502	12.02	PGSC0003DMT400071763	Ascorbate oxidase	chr04	Ascorbate oxidase	PGSC0003DMP400048542	PGSC0003DMG400027914	PGSC0003DMC400048542	PGSC0003DMT400071763	16.1	secondary metabolism.simple phenols	pgsc0003dmp400048542	moderately similar to ( 433) AT4G39830 | Symbols: | L-ascorbate oxidase, putative | chr4:18479103-18481184 FORWARDmoderately similar to ( 308) ASO_TOBAC L-ascorbate oxidase precursor (EC 1.10.3.3) (Ascorbase) (ASO) - Nicotiana tabacum (Common tobacco)moderately similar to ( 387) loc_os09g20090 12009.m05216 protein L-ascorbate oxidase precursor, putative, expressedCu-oxidase_2 PGSC0003DMT400071763
CUST_40077_PI426222305	1.02978	5.5584	1.25857	6.61753	2.6576	17.0636	1.45753	28.208	1.12447	7.13535	1.5991	19.4707	0.969717	5.76515	1.04841	5.68943	PGSC0003DMT400015066	Neoxanthin synthase, chloroplastic	chr06	Neoxanthin synthase, chloroplastic	PGSC0003DMP400010427	PGSC0003DMG400005886	PGSC0003DMC400010427	PGSC0003DMT400015066	16.1	secondary metabolism.isoprenoids.carotenoids.lycopene beta cyclase	pgsc0003dmp400010427	highly similar to ( 521) AT3G10230 | Symbols: LYC | LYC (LYCOPENE CYCLASE); lycopene beta cyclase | chr3:3164340-3165449 REVERSEhighly similar to ( 865) CCS_CAPAN Capsanthin/capsorubin synthase, chloroplast precursor (EC 5.3.99.8) - Capsicum annuum (Bell pepper)moderately similar to ( 489) loc_os02g09750 12002.m06272 protein lycopene beta cyclase, chloroplast precursor, putative, expressedLycopen…
CUST_27152_PI426222305	0.40172	17.1541	0.552969	18.3463	1.44632	50.5926	1.18174	59.3586	1.5104	54.5242	0.718201	29.5048	0.914095	36.7675	0.581293	19.4775	PGSC0003DMT400026363	Beta-carotene hydroxylase	chr03	Beta-carotene hydroxylase	PGSC0003DMP400018005	PGSC0003DMG400010169	PGSC0003DMC400018005	PGSC0003DMT400026363	16.1	secondary metabolism.isoprenoids.carotenoids.carotenoid beta ring hydroxylase	pgsc0003dmp400018005	moderately similar to ( 330) AT4G25700 | Symbols: BETA-OHASE 1, B1, chy1 | BETA-OHASE 1 (BETA-HYDROXYLASE 1); carotene beta-ring hydroxylase | chr4:13094965-13095866 REVERSEmoderately similar to ( 306) loc_os03g03370 12003.m34991 protein beta-carotene hydroxylase, putative, expressed PGSC0003DMT400026363

## Sheet: BIN1 PSII TableS12
Code ()*	WL6		Blue6		Red6		WL24		Blue24		Red24		Dark (18oC)		Dark (21oC)
Systematic	Normalized	Raw	Normalized	Raw	Normalized	Raw	Normalized	Raw	Normalized	Raw	Normalized	Raw	Normalized	Raw	Normalized	Raw	PrimaryAccession	UniRef based putative functional annotation	Chromosome	putative function	peptide ID	gene ID	CDS ID	transcript ID	MpMan bin	MapMan name	MapMan pep	MapMan description	GO: CC	GO: MF	GO: BP
CUST_9863_PI426222305	1.01844	4.34868	1.12525	4.77232	0.974441	4.72904	2.73134	121.349	1.04678	5.62852	2.74289	50.1307	1.17057	6.46857	1.04571	4.93205	PGSC0003DMT400011382	Light-harvesting complex I protein Lhca5	chr07	Light-harvesting complex I protein Lhca5	PGSC0003DMP400007919	PGSC0003DMG400004458	PGSC0003DMC400007919	PGSC0003DMT400011382	1.1.1.1	PS.lightreaction.photosystem II.LHC-II	pgsc0003dmp400007919	moderately similar to ( 275) AT1G45474 | Symbols: LHCA5 | LHCA5; pigment binding | chr1:17179353-17180439 FORWARDweakly similar to ( 129) CB12_PETHY Chlorophyll a-b binding protein, chloroplast precursor (LHCI type II CAB) - Petunia hybrida (Petunia)moderately similar to ( 246) loc_os02g52650 12002.m10295 protein chlorophyll a-b binding protein 4, chloroplast precursor, putative, expressedChloroa…
CUST_7314_PI426222305	0.995333	3.86954	1.18443	5.11441	0.95233	4.0157	1.97637	42.2455	1.03952	5.30172	2.19039	35.2707	1.03679	5.33132	0.998555	3.8746	PGSC0003DMT400010772	Photosystem Q(B) protein	chr01	Photosystem Q(B) protein	PGSC0003DMP400007506	PGSC0003DMG400004211	PGSC0003DMC400007506	PGSC0003DMT400010772	1.1.1.2	PS.lightreaction.photosystem II.PSII polypeptide subunits	pgsc0003dmp400007506	highly similar to ( 638) ATCG00020 | Symbols: PSBA | Encodes chlorophyll binding protein D1, a part of the photosystem II reaction center core | chrC:383-1444 REVERSEhighly similar to ( 637) PSBA_LOTJA Photosystem Q(B) protein (32 kDa thylakoid membrane protein) (Photosystem II protein D1) - Lotus japonicushighly similar to ( 636) loc_os08g35420 12008.m07531 protein photosystem Q, putative, expre…
CUST_28411_PI426222305	0.985059	4.88627	1.12047	5.05315	0.983813	5.1458	2.52547	109.207	1.07192	6.21037	3.29407	55.4689	1.05844	5.88091	0.990587	4.67001	PGSC0003DMT400080628	Oxygen-evolving enhancer protein 2, chloroplastic	chr05	Oxygen-evolving enhancer protein 2, chloroplastic	PGSC0003DMP400054683	PGSC0003DMG400031395	PGSC0003DMC400054683	PGSC0003DMT400080628	1.1.1.2	PS.lightreaction.photosystem II.PSII polypeptide subunits	pgsc0003dmp400054683	moderately similar to ( 218) AT1G06680 | Symbols: PSBP-1, OEE2, PSII-P | PSBP-1 (PHOTOSYSTEM II SUBUNIT P-1); poly(U) binding | chr1:2048076-2049186 FORWARDmoderately similar to ( 231) PSBP1_TOBAC Oxygen-evolving enhancer protein 2-1, chloroplast precursor (OEE2) (23 kDa subunit of oxygen evolving system of photosystem II) (OEC 23 kDa subunit) (23 kDa thylakoid membrane protein) - Nicotiana tabac…
CUST_51182_PI426222305	1.05957	4.94709	1.15421	4.96232	1.0078	4.74707	1.69495	29.3443	0.971778	5.11371	1.72092	17.1371	0.980202	5.14716	1.03633	4.49028	PGSC0003DMT400046004	Photosystem Q(B) protein	chr08	Photosystem Q(B) protein	PGSC0003DMP400031170	PGSC0003DMG400017848	PGSC0003DMC400031170	PGSC0003DMT400046004	1.1.1.2	PS.lightreaction.photosystem II.PSII polypeptide subunits	pgsc0003dmp400031170	weakly similar to ( 103) ATCG00020 | Symbols: PSBA | Encodes chlorophyll binding protein D1, a part of the photosystem II reaction center core | chrC:383-1444 REVERSEweakly similar to ( 104) PSBA_MESVI Photosystem Q(B) protein (32 kDa thylakoid membrane protein) (Photosystem II protein D1) - Mesostigma virideweakly similar to ( 103) loc_os08g35420 12008.m07531 protein photosystem Q, putative, exp…
CUST_37605_PI426222305	1.04032	4.53349	1.1542	4.86899	1.00155	4.73314	2.3943	77.9683	0.932642	4.8154	2.58841	50.2876	0.987109	4.86876	1.05694	4.80222	PGSC0003DMT400049551	Chloroplast chlorophyll a-b binding protein	chr07	Chlorophyll a-b binding protein 13, chloroplastic	PGSC0003DMP400033446	PGSC0003DMG400019248	PGSC0003DMC400033446	PGSC0003DMT400049551	1.1.1.1	PS.lightreaction.photosystem II.LHC-II	pgsc0003dmp400033446	moderately similar to ( 308) AT5G54270 | Symbols: LHCB3, LHCB3*1 | LHCB3 (LIGHT-HARVESTING CHLOROPHYLL B-BINDING PROTEIN 3); structural molecule | chr5:22038424-22039383 FORWARDmoderately similar to ( 298) CB23_HORVU Chlorophyll a-b binding protein of LHCII type III, chloroplast precursor (CAB) - Hordeum vulgare (Barley)moderately similar to ( 311) loc_os07g37550 12007.m079717 protein chlorophyll…
CUST_12052_PI426222305	1.04032	3.86193	1.12544	3.97758	0.995373	3.91708	2.39925	77.8499	0.932642	4.07318	2.55399	47.8661	0.959186	4.51957	1.11734	4.72161	PGSC0003DMT400005957	Chloroplast photosystem II 10 kDa protein	chr12	Photosystem II 10 kDa polypeptide, chloroplast	PGSC0003DMP400004130	PGSC0003DMG400002312	PGSC0003DMC400004130	PGSC0003DMT400005957	1.1.1.2	PS.lightreaction.photosystem II.PSII polypeptide subunits	pgsc0003dmp400004130	very weakly similar to (83.6) AT1G79040 | Symbols: PSBR | PSBR (photosystem II subunit R) | chr1:29736085-29736781 FORWARDvery weakly similar to (89.0) PSBR_TOBAC Photosystem II 10 kDa polypeptide, chloroplast precursor (PII10) - Nicotiana tabacum (Common tobacco) PGSC0003DMT400005957
CUST_40933_PI426222305	1.06114	4.83321	1.14416	4.87811	0.998076	4.66799	2.86661	131.549	0.932642	4.73426	2.46365	43.7338	0.982294	4.7917	1.04862	4.69382	PGSC0003DMT400019207	Calcium ion binding	chr11	Calcium ion binding	PGSC0003DMP400013162	PGSC0003DMG400007427	PGSC0003DMC400013162	PGSC0003DMT400019207	1.1.1.2	PS.lightreaction.photosystem II.PSII polypeptide subunits	pgsc0003dmp400013162	weakly similar to ( 141) AT3G05410 | Symbols: | calcium ion binding | chr3:1554783-1561456 FORWARDweakly similar to ( 124) loc_os01g70820 12001.m13127 protein expressed protein PGSC0003DMT400019207
CUST_40906_PI426222305	1.04032	3.89397	1.12544	3.97173	0.995373	3.92766	2.5936	97.6933	0.96495	4.46743	2.13964	29.2085	0.959186	4.30138	1.05298	4.35302	PGSC0003DMT400019204	Calcium ion binding	chr11	Calcium ion binding	PGSC0003DMP400013159	PGSC0003DMG400007427	PGSC0003DMC400013159	PGSC0003DMT400019204	1.1.1.2	PS.lightreaction.photosystem II.PSII polypeptide subunits	pgsc0003dmp400013159	moderately similar to ( 318) AT3G05410 | Symbols: | calcium ion binding | chr3:1554783-1561456 FORWARDmoderately similar to ( 291) loc_os01g70820 12001.m13127 protein expressed protein PGSC0003DMT400019204
CUST_40904_PI426222305	1.03299	4.42133	1.20128	5.08547	0.989887	4.66567	2.68704	111.075	0.926071	4.66556	2.31757	37.6396	0.965814	4.94042	1.03633	4.52484	PGSC0003DMT400019203	Calcium ion binding	chr11	Calcium ion binding	PGSC0003DMP400013158	PGSC0003DMG400007427	PGSC0003DMC400013158	PGSC0003DMT400019203	1.1.1.2	PS.lightreaction.photosystem II.PSII polypeptide subunits	pgsc0003dmp400013158	moderately similar to ( 224) AT3G05410 | Symbols: | calcium ion binding | chr3:1554783-1561456 FORWARDmoderately similar to ( 216) loc_os01g70820 12001.m13127 protein expressed protein PGSC0003DMT400019203
CUST_25583_PI426222305	1.07332	5.49971	1.13848	5.43246	1.10313	5.80398	1.6201	32.0253	1.11791	6.70803	1.73788	19.3965	1.01562	5.70961	1.05953	5.24383	PGSC0003DMT400037325	Oxygen-evolving enhancer protein 3-1, chloroplast	chr10	Oxygen-evolving enhancer protein 3-1, chloroplast	PGSC0003DMP400025363	PGSC0003DMG400014402	PGSC0003DMC400025363	PGSC0003DMT400037325	1.1.1.2	PS.lightreaction.photosystem II.PSII polypeptide subunits	pgsc0003dmp400025363	weakly similar to ( 186) AT3G01440 | Symbols: | oxygen evolving enhancer 3 (PsbQ) family protein | chr3:168478-169407 FORWARDweakly similar to ( 116) loc_os07g01480 12007.m04628 protein oxygen evolving enhancer protein 3 containing protein, expressedPsbQ PGSC0003DMT400037325
CUST_14064_PI426222305	1.03299	4.42936	1.11751	4.5032	0.988359	4.4487	2.58972	99.6568	1.15936	6.35845	2.3829	40.4872	0.952427	4.59986	1.03633	4.38049	PGSC0003DMT400060313	Chlorophyll a-b binding protein 6A, chloroplastic	chr05	Chlorophyll a-b binding protein 6A, chloroplastic	PGSC0003DMP400040595	PGSC0003DMG400023461	PGSC0003DMC400040595	PGSC0003DMT400060313	1.1.1.1	PS.lightreaction.photosystem II.LHC-II	pgsc0003dmp400040595	moderately similar to ( 354) AT3G54890 | Symbols: LHCA1 | LHCA1; chlorophyll binding | chr3:20339881-20340922 REVERSEweakly similar to ( 120) CB21_SINAL Chlorophyll a-b binding protein 1, chloroplast precursor (LHCII type I CAB-1) (LHCP) - Sinapis alba (White mustard) (Brassica hirta)moderately similar to ( 338) loc_os06g21590 12006.m32064 protein chlorophyll a-b binding protein 6A, chloroplast p…
CUST_48281_PI426222305	1.04032	4.6122	1.13458	4.65808	0.997238	4.46636	1.8557	37.8856	0.945421	4.81085	2.20569	32.1249	0.959186	4.86886	1.04369	4.27559	PGSC0003DMT400002421	Oxygen-evolving enhancer protein 2, chloroplastic	chr07	Oxygen-evolving enhancer protein 2, chloroplastic	PGSC0003DMP400001760	PGSC0003DMG400000926	PGSC0003DMC400001760	PGSC0003DMT400002421	1.1.1.2	PS.lightreaction.photosystem II.PSII polypeptide subunits	pgsc0003dmp400001760	moderately similar to ( 338) AT1G06680 | Symbols: PSBP-1, OEE2, PSII-P | PSBP-1 (PHOTOSYSTEM II SUBUNIT P-1); poly(U) binding | chr1:2048076-2049186 FORWARDmoderately similar to ( 450) PSBP_SOLTU Oxygen-evolving enhancer protein 2, chloroplast precursor (OEE2) (23 kDa subunit of oxygen evolving system of photosystem II) (OEC 23 kDa subunit) (23 kDa thylakoid membrane protein) - Solanum tuberosum …	GO:0009535;GO:0019898;GO:0009654	GO:0005509	GO:0015979
CUST_25494_PI426222305	1.04032	4.0578	1.12544	4.09459	0.995373	4.0626	1.50672	21.2938	0.932642	4.34198	1.86648	20.3642	0.959186	4.45937	1.04369	3.87429	PGSC0003DMT400037324	Oxygen-evolving enhancer protein 3-1, chloroplast	chr10	Oxygen-evolving enhancer protein 3-1, chloroplast	PGSC0003DMP400025362	PGSC0003DMG400014402	PGSC0003DMC400025362	PGSC0003DMT400037324	1.1.1.2	PS.lightreaction.photosystem II.PSII polypeptide subunits	pgsc0003dmp400025362	moderately similar to ( 225) AT3G01440 | Symbols: | oxygen evolving enhancer 3 (PsbQ) family protein | chr3:168478-169407 FORWARDweakly similar to ( 138) loc_os07g01480 12007.m04628 protein oxygen evolving enhancer protein 3 containing protein, expressedPsbQ PGSC0003DMT400037324
CUST_25829_PI426222305	1.04984	5.19921	1.39085	6.57646	0.981085	4.97899	2.95758	85.5178	1.20924	7.15824	2.25974	38.5073	0.971426	5.27434	1.33518	6.96595	PGSC0003DMT400051899	Photosystem II reaction center W protein, chloroplastic	chr06	Photosystem II reaction center W protein, chloroplastic	PGSC0003DMP400034952	PGSC0003DMG400020141	PGSC0003DMC400034952	PGSC0003DMT400051899	1.1.1.2	PS.lightreaction.photosystem II.PSII polypeptide subunits	pgsc0003dmp400034952	weakly similar to ( 126) AT2G30570 | Symbols: PSBW | PSBW (PHOTOSYSTEM II REACTION CENTER W) | chr2:13019326-13020053 REVERSEweakly similar to ( 116) PSBW_SPIOL Photosystem II reaction center W protein, chloroplast precursor (PSII 6.1 kDa protein) - Spinacia oleracea (Spinach)PsbW PGSC0003DMT400051899
CUST_8101_PI426222305	1.01844	4.03117	3.52256	20.8895	0.974441	4.10821	6.8614	498.376	0.929968	4.52626	4.08304	184.961	1.12865	5.89892	1.02174	4.03915	PGSC0003DMT400075597	PsbP domain-containing protein 3, chloroplastic	chr12	PsbP domain-containing protein 3, chloroplastic	PGSC0003DMP400051204	PGSC0003DMG400029399	PGSC0003DMC400051204	PGSC0003DMT400075597	1.1.1.2	PS.lightreaction.photosystem II.PSII polypeptide subunits	pgsc0003dmp400051204	moderately similar to ( 236) AT1G76450 | Symbols: | oxygen-evolving complex-related | chr1:28684618-28686109 FORWARDmoderately similar to ( 223) loc_os08g40160 12008.m07996 protein thylakoid lumen protein, chloroplast precursor, putative, expressed PGSC0003DMT400075597	GO:0019898;GO:0009654	GO:0005509	GO:0015979
CUST_7990_PI426222305	0.932284	4.75413	1.71455	9.18072	0.995436	5.93629	2.99049	165.906	0.794452	4.85314	2.14972	48.3676	0.948473	5.78786	1.23185	7.10617	PGSC0003DMT400075598	PsbP domain-containing protein 3, chloroplastic	chr12	PsbP domain-containing protein 3, chloroplastic	PGSC0003DMP400051205	PGSC0003DMG400029399	PGSC0003DMC400051205	PGSC0003DMT400075598	1.1.1.2	PS.lightreaction.photosystem II.PSII polypeptide subunits	pgsc0003dmp400051205	moderately similar to ( 252) AT1G76450 | Symbols: | oxygen-evolving complex-related | chr1:28684618-28686109 FORWARDmoderately similar to ( 224) loc_os08g40160 12008.m07996 protein thylakoid lumen protein, chloroplast precursor, putative, expressed PGSC0003DMT400075598	GO:0009535;GO:0009543;GO:0019898;GO:0009654	GO:0005509	GO:0015979
CUST_39041_PI426222305	1.01844	4.33315	1.47889	7.00754	0.974441	4.5819	2.8133	99.4216	0.978988	5.09701	2.49039	47.7868	0.946526	4.85141	1.02174	4.44331	PGSC0003DMT400068575	Isoform 2 of PsbP 2, chloroplastic	chr10	Isoform 2 of PsbP 2, chloroplastic	PGSC0003DMP400046332	PGSC0003DMG400026667	PGSC0003DMC400046332	PGSC0003DMT400068575	1.1.1.2	PS.lightreaction.photosystem II.PSII polypeptide subunits	pgsc0003dmp400046332	moderately similar to ( 243) AT2G39470 | Symbols: PPL2 | PPL2 (PsbP-like protein 2); calcium ion binding | chr2:16476335-16477402 FORWARDmoderately similar to ( 220) loc_os03g17174 12003.m101683 protein calcium ion binding protein, putative, expressedPsbP PGSC0003DMT400068575
CUST_13080_PI426222305	1.1469	5.34603	1.62156	7.94596	0.995373	4.65257	3.27626	195.034	0.932642	4.76122	3.14199	87.4282	0.99021	4.92337	1.06074	4.83796	PGSC0003DMT400007514	Chlorophyll A/B binding protein	chr01	Chlorophyll A/B binding protein	PGSC0003DMP400005227	PGSC0003DMG400002901	PGSC0003DMC400005227	PGSC0003DMT400007514	1.1.1.1	PS.lightreaction.photosystem II.LHC-II	pgsc0003dmp400005227	moderately similar to ( 397) AT1G19150 | Symbols: LHCA6, LHCA2*1 | LHCA6; chlorophyll binding | chr1:6612806-6613799 FORWARDmoderately similar to ( 312) CB12_PETHY Chlorophyll a-b binding protein, chloroplast precursor (LHCI type II CAB) - Petunia hybrida (Petunia)moderately similar to ( 353) loc_os09g26810 12009.m05833 protein chlorophyll a-b binding protein, chloroplast precursor, putative, exp…
CUST_25664_PI426222305	1.12738	4.87786	1.3055	5.5704	0.988359	4.02201	1.72334	31.0914	0.927814	4.47261	1.7038	16.3589	1.05342	5.20105	1.03633	3.91809	PGSC0003DMT400037326	Oxygen evolving enhancer 3 family protein	chr10	Oxygen-evolving enhancer protein 3-1, chloroplast	PGSC0003DMP400025364	PGSC0003DMG400014402	PGSC0003DMC400025364	PGSC0003DMT400037326	1.1.1.2	PS.lightreaction.photosystem II.PSII polypeptide subunits	pgsc0003dmp400025364	weakly similar to ( 123) AT3G01440 | Symbols: | oxygen evolving enhancer 3 (PsbQ) family protein | chr3:168478-169407 FORWARDvery weakly similar to (93.2) loc_os07g01480 12007.m04628 protein oxygen evolving enhancer protein 3 containing protein, expressedPsbQ PGSC0003DMT400037326
CUST_12846_PI426222305	0.983668	4.87201	2.23359	12.0721	0.990844	5.35253	2.95536	178.169	0.96189	5.4537	5.02772	93.2313	1.27635	7.5935	0.991516	4.81824	PGSC0003DMT400063427	Calcium ion binding protein	chr03	Calcium ion binding protein	PGSC0003DMP400042709	PGSC0003DMG400024679	PGSC0003DMC400042709	PGSC0003DMT400063427	1.1.1.2	PS.lightreaction.photosystem II.PSII polypeptide subunits	pgsc0003dmp400042709	weakly similar to ( 105) AT2G01918 | Symbols: | calcium ion binding | chr2:424254-425678 REVERSEweakly similar to ( 132) loc_os04g44200 12004.m09378 protein oxygen-evolving enhancer protein 3, chloroplast precursor, putative PGSC0003DMT400063427
CUST_42058_PI426222305	1.25347	6.99755	1.35389	6.84906	0.951322	5.41498	1.52981	25.2234	0.937384	5.70737	1.65883	20.5517	1.09665	6.55264	0.958819	5.1729	PGSC0003DMT400056026	PsbP domain-containing protein 3, chloroplastic	chr03	PsbP domain-containing protein 3, chloroplastic	PGSC0003DMP400037716	PGSC0003DMG400021762	PGSC0003DMC400037716	PGSC0003DMT400056026	1.1.1.2	PS.lightreaction.photosystem II.PSII polypeptide subunits	pgsc0003dmp400037716	weakly similar to ( 112) AT1G76450 | Symbols: | oxygen-evolving complex-related | chr1:28684618-28686109 FORWARDweakly similar to ( 104) loc_os08g40160 12008.m07996 protein thylakoid lumen protein, chloroplast precursor, putative, expressed PGSC0003DMT400056026
CUST_39427_PI426222305	1.57281	8.76729	1.80854	10.2419	0.988359	4.27342	1.94544	43.8822	0.926071	4.48222	2.28759	36.0769	1.61153	11.1703	1.03633	4.285	PGSC0003DMT400077330	Conserved gene of unknown function	chr09	Conserved gene of unknown function	PGSC0003DMP400052381	PGSC0003DMG400030078	PGSC0003DMC400052381	PGSC0003DMT400077330	1.1.1.2	PS.lightreaction.photosystem II.PSII polypeptide subunits	pgsc0003dmp400052381	weakly similar to ( 184) AT1G05385 | Symbols: | photosystem II 11 kDa protein-related | chr1:1582747-1583648 REVERSEweakly similar to ( 162) loc_os03g53640 12003.m10335 protein expressed protein PGSC0003DMT400077330	GO:0009543		GO:0010207
CUST_44514_PI426222305	0.969455	4.94867	1.12545	5.54159	0.923854	5.02368	6.39051	128.272	3.84362	34.1632	10.7665	84.3514	0.937118	5.4126	0.942416	4.77296	PGSC0003DMT400043054	Chlorophyll a-b binding protein 50, chloroplastic	chr03	Chlorophyll a-b binding protein 50, chloroplastic	PGSC0003DMP400029202	PGSC0003DMG400016695	PGSC0003DMC400029202	PGSC0003DMT400043054	1.1.1.1	PS.lightreaction.photosystem II.LHC-II	pgsc0003dmp400029202	moderately similar to ( 459) AT1G29930 | Symbols: CAB1, AB140, CAB140, LHCB1.3 | CAB1 (CHLOROPHYLL A/B BINDING PROTEIN 1); chlorophyll binding | chr1:10478071-10478874 FORWARDhighly similar to ( 509) CB25_TOBAC Chlorophyll a-b binding protein 50, chloroplast precursor (LHCII type I CAB-50) (LHCP) - Nicotiana tabacum (Common tobacco)moderately similar to ( 455) loc_os01g41710 12001.m42672 protein …	GO:0016021;GO:0009535;GO:0009523;GO:0009522	GO:0046872;GO:0016168	GO:0009765;GO:0018298
CUST_27029_PI426222305	0.483771	6.76021	0.821453	12.0959	0.389369	5.4488	2.86333	91.2811	1.34548	21.1585	1.72035	44.4833	1.18267	18.9277	0.689603	10.806	PGSC0003DMT400067194	Thylakoid lumenal 29.8 kDa protein, chloroplast	chr06	Thylakoid lumenal 29.8 kDa protein, chloroplast	PGSC0003DMP400045327	PGSC0003DMG400026121	PGSC0003DMC400045327	PGSC0003DMT400067194	1.1.1.2	PS.lightreaction.photosystem II.PSII polypeptide subunits	pgsc0003dmp400045327	moderately similar to ( 325) AT3G56650 | Symbols: | thylakoid lumenal 20 kDa protein | chr3:20984807-20985913 FORWARDmoderately similar to ( 312) loc_os01g59090 12001.m12048 protein expressed protein PGSC0003DMT400067194	GO:0009570;GO:0009543;GO:0019898;GO:0009654	GO:0005515;GO:0005509	GO:0010027;GO:0015979;GO:0009965;GO:0030154
CUST_843_PI426222305	0.781746	694.742	1.1285	938.534	0.649525	589.908	3.26442	4313.84	4.74991	4509.79	1.06247	1126.88	0.604633	561.276	0.955004	825.372	PGSC0003DMT400026009	Oxygen-evolving enhancer protein 1, chloroplastic	chr02	Oxygen-evolving enhancer protein 1, chloroplastic	PGSC0003DMP400017746	PGSC0003DMG400010035	PGSC0003DMC400017746	PGSC0003DMT400026009	1.1.1.2	PS.lightreaction.photosystem II.PSII polypeptide subunits	pgsc0003dmp400017746	highly similar to ( 502) AT3G50820 | Symbols: PSBO2, PSBO-2, OEC33 | PSBO2 (PHOTOSYSTEM II SUBUNIT O-2); oxygen evolving/ poly(U) binding | chr3:18891008-18892311 REVERSEhighly similar to ( 603) PSBO_SOLTU Oxygen-evolving enhancer protein 1, chloroplast precursor (OEE1) (33 kDa subunit of oxygen evolving system of photosystem II) (OEC 33 kDa subunit) (33 kDa thylakoid membrane protein) - Solanum …	GO:0048046;GO:0010287;GO:0009535;GO:0009543;GO:0019898;GO:0009654	GO:0005509;GO:0008266;GO:0010242	GO:0010207;GO:0042742;GO:0035304;GO:0010205;GO:0042549
CUST_48299_PI426222305	0.789456	245.392	1.33263	404.255	0.571619	183.603	4.41226	2011.02	5.25327	1754.65	1.41682	522.292	0.576117	188.081	0.969498	282.867	PGSC0003DMT400002422	Oxygen-evolving enhancer protein 2, chloroplastic	chr07	Oxygen-evolving enhancer protein 2, chloroplastic	PGSC0003DMP400001761	PGSC0003DMG400000926	PGSC0003DMC400001761	PGSC0003DMT400002422	1.1.1.2	PS.lightreaction.photosystem II.PSII polypeptide subunits	pgsc0003dmp400001761	moderately similar to ( 351) AT1G06680 | Symbols: PSBP-1, OEE2, PSII-P | PSBP-1 (PHOTOSYSTEM II SUBUNIT P-1); poly(U) binding | chr1:2048076-2049186 FORWARDmoderately similar to ( 461) PSBP_SOLTU Oxygen-evolving enhancer protein 2, chloroplast precursor (OEE2) (23 kDa subunit of oxygen evolving system of photosystem II) (OEC 23 kDa subunit) (23 kDa thylakoid membrane protein) - Solanum tuberosum …	GO:0019898;GO:0009654	GO:0005509	GO:0015979
CUST_36662_PI426222305	0.750443	273.198	1.1054	371.305	0.843812	307.271	1.77695	1050.27	1.87184	760.804	1.20333	517.614	0.814819	307.317	0.909072	323.878	PGSC0003DMT400011048	PSII 47 kDa protein	chr10	PSII 47 kDa protein	PGSC0003DMP400007690	PGSC0003DMG400004326	PGSC0003DMC400007690	PGSC0003DMT400011048	1.1.1.2	PS.lightreaction.photosystem II.PSII polypeptide subunits	pgsc0003dmp400007690	very weakly similar to (99.8) ATCG00680 | Symbols: PSBB | encodes for CP47, subunit of the photosystem II reaction center. | chrC:72371-73897 FORWARDvery weakly similar to ( 100) PSBB_TOBAC Photosystem II P680 chlorophyll A apoprotein (CP-47 protein) - Nicotiana tabacum (Common tobacco)very weakly similar to ( 100) loc_osp1g00600 11562.m00051 protein photosystem II 47 kDa proteinpsbB PGSC0003DMT4…
CUST_20382_PI426222305	0.811512	232.155	1.31015	365.36	0.821964	245.638	2.02437	879.606	2.25655	706.381	1.33468	464.656	0.726741	222.912	1.09027	309.123	PGSC0003DMT400019490	Photosystem II reaction center W protein, chloroplastic	chr09	Photosystem II reaction center W protein, chloroplastic	PGSC0003DMP400013342	PGSC0003DMG400007536	PGSC0003DMC400013342	PGSC0003DMT400019490	1.1.1.2	PS.lightreaction.photosystem II.PSII polypeptide subunits	pgsc0003dmp400013342	weakly similar to ( 124) AT2G30570 | Symbols: PSBW | PSBW (PHOTOSYSTEM II REACTION CENTER W) | chr2:13019326-13020053 REVERSEweakly similar to ( 123) PSBW_SPIOL Photosystem II reaction center W protein, chloroplast precursor (PSII 6.1 kDa protein) - Spinacia oleracea (Spinach)PsbW PGSC0003DMT400019490	GO:0016021;GO:0009535;GO:0009523		GO:0015979
CUST_46156_PI426222305	0.682966	20.6802	1.10555	33.1293	0.729438	23.7224	7.51184	350.236	8.57897	293.038	1.64163	61.2587	0.357516	13.6231	0.408859	15.8128	PGSC0003DMT400018554	Photosystem II core complex proteins psbY, chloroplast	chr10	Photosystem II core complex proteins psbY, chloroplast	PGSC0003DMP400012769	PGSC0003DMG400007201	PGSC0003DMC400012769	PGSC0003DMT400018554	1.1.1.2	PS.lightreaction.photosystem II.PSII polypeptide subunits	pgsc0003dmp400012769	weakly similar to ( 108) AT1G67740 | Symbols: PSBY, YCF32 | PSBY | chr1:25394429-25394998 REVERSEweakly similar to ( 114) PSBY_SPIOL Photosystem II core complex proteins psbY, chloroplast precursor (L-arginine-metabolizing enzyme) (L-AME) [Contains: Photosystem II protein psbY-1 (psbY-A1); Photosystem II protein psbY-2 (psbY-A2)] - Spinacia oleracea (Spinach) PGSC0003DMT400018554
CUST_12302_PI426222305	0.578832	14.1243	0.992882	19.9607	0.997281	23.321	5.6694	187.81	7.25069	172.032	1.53301	40.8542	0.396033	9.57982	0.369011	9.19202	PGSC0003DMT400007189	Oxygen-evolving enhancer protein 1, chloroplastic	chr02	Oxygen-evolving enhancer protein 1, chloroplastic	PGSC0003DMP400004990	PGSC0003DMG400002782	PGSC0003DMC400004990	PGSC0003DMT400007189	1.1.1.2	PS.lightreaction.photosystem II.PSII polypeptide subunits	pgsc0003dmp400004990	moderately similar to ( 499) AT3G50820 | Symbols: PSBO2, PSBO-2, OEC33 | PSBO2 (PHOTOSYSTEM II SUBUNIT O-2); oxygen evolving/ poly(U) binding | chr3:18891008-18892311 REVERSEhighly similar to ( 560) PSBO_SOLTU Oxygen-evolving enhancer protein 1, chloroplast precursor (OEE1) (33 kDa subunit of oxygen evolving system of photosystem II) (OEC 33 kDa subunit) (33 kDa thylakoid membrane protein) - Sola…
CUST_23887_PI426222305	0.535744	5.81602	1.02438	12.3446	0.866679	10.5395	4.97029	89.2205	4.21624	51.3571	1.74043	30.3775	0.530267	6.46669	0.794318	8.76691	PGSC0003DMT400027722	Thylakoid lumenal 21.5 kDa protein, chloroplast	chr01	Thylakoid lumenal 21.5 kDa protein, chloroplast	PGSC0003DMP400018889	PGSC0003DMG400010682	PGSC0003DMC400018889	PGSC0003DMT400027722	1.1.1.2	PS.lightreaction.photosystem II.PSII polypeptide subunits	pgsc0003dmp400018889	moderately similar to ( 295) AT4G15510 | Symbols: | photosystem II reaction center PsbP family protein | chr4:8861351-8862529 FORWARDmoderately similar to ( 286) loc_os07g17390 12007.m06180 protein thylakoid lumenal 21.5 kDa protein, chloroplast precursor, putative, expressedPsbP PGSC0003DMT400027722	GO:0019898;GO:0009654	GO:0005509	GO:0015979
CUST_38194_PI426222305	0.834308	93.9213	0.996985	113.524	0.633147	71.4514	4.18944	688.853	7.09673	859.228	1.98909	263.731	0.451825	52.1349	0.744083	82.1473	PGSC0003DMT400054836	Chlorophyll a-b binding protein 8, chloroplastic	chr10	Chlorophyll a-b binding protein 8, chloroplastic	PGSC0003DMP400036884	PGSC0003DMG400021287	PGSC0003DMC400036884	PGSC0003DMT400054836	1.1.1.1	PS.lightreaction.photosystem II.LHC-II	pgsc0003dmp400036884	moderately similar to ( 416) AT1G61520 | Symbols: LHCA3 | LHCA3; chlorophyll binding | chr1:22700493-22701149 FORWARDweakly similar to ( 146) CB12_PETHY Chlorophyll a-b binding protein, chloroplast precursor (LHCI type II CAB) - Petunia hybrida (Petunia)moderately similar to ( 369) loc_os02g10390 12002.m33354 protein chlorophyll a-b binding protein 8, chloroplast precursor, putative, expressedChl…	GO:0009535	GO:0046872	GO:0009765
CUST_31307_PI426222305	0.619981	14.7861	0.666635	13.3353	0.442603	11.3697	13.8475	420.923	10.1645	285.753	3.24769	75.0496	0.248213	4.69771	0.31365	5.72491	PGSC0003DMT400034893	Chlorophyll a-b binding protein 3C	chr03	Chlorophyll a-b binding protein 3C	PGSC0003DMP400023739	PGSC0003DMG400013412	PGSC0003DMC400023739	PGSC0003DMT400034893	1.1.1.1	PS.lightreaction.photosystem II.LHC-II	pgsc0003dmp400023739	moderately similar to ( 446) AT1G29930 | Symbols: CAB1, AB140, CAB140, LHCB1.3 | CAB1 (CHLOROPHYLL A/B BINDING PROTEIN 1); chlorophyll binding | chr1:10478071-10478874 FORWARDmoderately similar to ( 489) CB25_TOBAC Chlorophyll a-b binding protein 50, chloroplast precursor (LHCII type I CAB-50) (LHCP) - Nicotiana tabacum (Common tobacco)moderately similar to ( 446) loc_os01g41710 12001.m42672 prot…
CUST_12875_PI426222305	0.708549	14.8051	0.959871	17.3847	0.803596	16.2581	8.13577	244.199	7.53918	163.075	2.33129	55.719	0.351162	7.9026	0.904356	17.5037	PGSC0003DMT400063057	Thylakoid lumenal 25.6 kDa protein, chloroplast	chr03	Thylakoid lumenal 25.6 kDa protein, chloroplast	PGSC0003DMP400042441	PGSC0003DMG400024531	PGSC0003DMC400042441	PGSC0003DMT400063057	1.1.1.2	PS.lightreaction.photosystem II.PSII polypeptide subunits	pgsc0003dmp400042441	moderately similar to ( 251) AT3G55330 | Symbols: PPL1 | PPL1 (PsbP-like protein 1); calcium ion binding | chr3:20514031-20515275 REVERSEmoderately similar to ( 266) loc_os10g32348 12010.m22024 protein psbP family protein, expressedPsbP PGSC0003DMT400063057
CUST_12806_PI426222305	0.960953	17.9842	1.05127	19.935	0.675463	13.142	7.56994	217.842	8.18501	169.459	2.26278	54.6969	0.412799	8.68553	0.86892	16.3359	PGSC0003DMT400063056	Thylakoid lumenal 25.6 kDa protein, chloroplast	chr03	Thylakoid lumenal 25.6 kDa protein, chloroplast	PGSC0003DMP400042440	PGSC0003DMG400024531	PGSC0003DMC400042440	PGSC0003DMT400063056	1.1.1.2	PS.lightreaction.photosystem II.PSII polypeptide subunits	pgsc0003dmp400042440	moderately similar to ( 271) AT3G55330 | Symbols: PPL1 | PPL1 (PsbP-like protein 1); calcium ion binding | chr3:20514031-20515275 REVERSEmoderately similar to ( 267) loc_os10g32348 12010.m22024 protein psbP family protein, expressedPsbP PGSC0003DMT400063056
CUST_49023_PI426222305	0.562461	41.7666	1.38697	102.652	0.381552	29.0825	13.7051	1438.86	16.6427	1368.36	3.27649	283.884	0.44516	33.5023	1.1931	94.1693	PGSC0003DMT400021871	Chloroplast pigment-binding protein CP29	chr09	Chloroplast pigment-binding protein CP29	PGSC0003DMP400014894	PGSC0003DMG400008488	PGSC0003DMC400014894	PGSC0003DMT400021871	1.1.1.1	PS.lightreaction.photosystem II.LHC-II	pgsc0003dmp400014894	moderately similar to ( 461) AT3G08940 | Symbols: LHCB4.2 | LHCB4.2 (light harvesting complex PSII); chlorophyll binding | chr3:2717717-2718665 FORWARDmoderately similar to ( 240) CB29_CHLRE Chlorophyll a-b binding protein CP29 - Chlamydomonas reinhardtiimoderately similar to ( 441) loc_os07g37240 12007.m29225 protein expressed proteinChloroa_b-bind PGSC0003DMT400021871
CUST_48220_PI426222305	0.487621	9.09397	1.37438	25.2319	0.508466	10.2556	20.6594	562.005	27.3027	544.77	4.35708	105.226	0.343762	6.84297	0.645403	12.4539	PGSC0003DMT400055931	Photosystem II oxygen-evolving complex protein 3	chr02	Photosystem II oxygen-evolving complex protein 3	PGSC0003DMP400037659	PGSC0003DMG400021727	PGSC0003DMC400037659	PGSC0003DMT400055931	1.1.1.2	PS.lightreaction.photosystem II.PSII polypeptide subunits	pgsc0003dmp400037659	moderately similar to ( 253) AT4G05180 | Symbols: PSBQ, PSBQ-2, PSII-Q | PSBQ-2; calcium ion binding | chr4:2672093-2673170 REVERSEmoderately similar to ( 249) PSBQ_SPIOL Oxygen-evolving enhancer protein 3, chloroplast precursor (OEE3) (16 kDa subunit of oxygen evolving system of photosystem II) (OEC 16 kDa subunit) - Spinacia oleracea (Spinach)weakly similar to ( 175) loc_os07g36080 12007.m07970…
CUST_44706_PI426222305	0.643465	5.10112	1.53397	12.5626	0.641752	5.50014	119.632	1515.95	94.6017	984.003	7.22801	101.647	0.681544	6.0778	0.801157	6.8756	PGSC0003DMT400045248	Photosystem II 22 kDa protein, chloroplastic	chr06	Photosystem II 22 kDa protein, chloroplastic	PGSC0003DMP400030661	PGSC0003DMG400017556	PGSC0003DMC400030661	PGSC0003DMT400045248	1.1.1.2	PS.lightreaction.photosystem II.PSII polypeptide subunits	pgsc0003dmp400030661	moderately similar to ( 233) AT1G44575 | Symbols: NPQ4, PSBS | NPQ4 (NONPHOTOCHEMICAL QUENCHING); chlorophyll binding / xanthophyll binding | chr1:16871768-16872548 FORWARDmoderately similar to ( 253) PSBS_TOBAC Photosystem II 22 kDa protein, chloroplast precursor (CP22) - Nicotiana tabacum (Common tobacco)moderately similar to ( 241) loc_os04g59440 12004.m10820 protein photosystem II 22 kDa prot…
CUST_29666_PI426222305	0.937659	4.51136	1.5325	8.82796	0.908742	5.04144	33.7465	280.325	29.6513	182.678	5.71161	58.8105	0.878676	4.82348	0.941326	4.69321	PGSC0003DMT400047436	Oxygen evolving enhancer protein 3	chr05	Oxygen evolving enhancer protein 3	PGSC0003DMP400032117	PGSC0003DMG400018434	PGSC0003DMC400032117	PGSC0003DMT400047436	1.1.1.2	PS.lightreaction.photosystem II.PSII polypeptide subunits	pgsc0003dmp400032117	weakly similar to ( 176) AT1G14150 | Symbols: | oxygen evolving enhancer 3 (PsbQ) family protein | chr1:4839885-4840632 FORWARDweakly similar to ( 161) loc_os02g36850 12002.m08772 protein oxygen evolving enhancer protein 3, putative, expressedPsbQ PGSC0003DMT400047436
CUST_32731_PI426222305	0.651871	88.6163	0.898541	103.567	0.750965	97.2898	5.53382	1226.83	4.29796	586.203	1.94719	368.749	0.67722	89.6174	0.753967	95.7547	PGSC0003DMT400047280	Photosystem II 11 kDa protein	chr07	Photosystem II 11 kDa protein	PGSC0003DMP400031997	PGSC0003DMG400018360	PGSC0003DMC400031997	PGSC0003DMT400047280	1.1.1.2	PS.lightreaction.photosystem II.PSII polypeptide subunits	pgsc0003dmp400031997	weakly similar to ( 163) AT1G03600 | Symbols: | photosystem II family protein | chr1:898916-899440 FORWARDweakly similar to ( 153) loc_os03g21560 12003.m07560 protein photosystem II 11 kD protein, putative, expressed PGSC0003DMT400047280	GO:0009507;GO:0030076;GO:0044446	GO:0045156	GO:0009772
CUST_11978_PI426222305	0.784142	556.707	0.853505	578.066	0.625595	468.598	3.16529	3519.93	3.74208	2968.66	1.59591	1433.96	0.717399	557.635	1.49106	1076.09	PGSC0003DMT400005956	Photosystem II 10 kDa polypeptide, chloroplast	chr12	Photosystem II 10 kDa polypeptide, chloroplast	PGSC0003DMP400004129	PGSC0003DMG400002312	PGSC0003DMC400004129	PGSC0003DMT400005956	1.1.1.2	PS.lightreaction.photosystem II.PSII polypeptide subunits	pgsc0003dmp400004129	very weakly similar to (80.9) AT1G79040 | Symbols: PSBR | PSBR (photosystem II subunit R) | chr1:29736085-29736781 FORWARDvery weakly similar to (86.7) PSBR_TOBAC Photosystem II 10 kDa polypeptide, chloroplast precursor (PII10) - Nicotiana tabacum (Common tobacco)PsbR PGSC0003DMT400005956
CUST_28426_PI426222305	0.723637	89.1781	1.02431	115.149	0.743193	92.7656	1.96136	475.291	1.82547	252.229	1.34575	215.115	0.81807	105.046	0.877306	106.35	PGSC0003DMT400016568	Photosystem II CP47 chlorophyll apoprotein	chr05	Photosystem II CP47 chlorophyll apoprotein	PGSC0003DMP400011484	PGSC0003DMG400006472	PGSC0003DMC400011484	PGSC0003DMT400016568	1.1.1.2	PS.lightreaction.photosystem II.PSII polypeptide subunits	pgsc0003dmp400011484	weakly similar to ( 193) ATCG00680 | Symbols: PSBB | encodes for CP47, subunit of the photosystem II reaction center. | chrC:72371-73897 FORWARDweakly similar to ( 198) PSBB_HORVU Photosystem II P680 chlorophyll A apoprotein (CP-47 protein) - Hordeum vulgare (Barley)weakly similar to ( 191) loc_osp1g00600 11562.m00051 protein photosystem II 47 kDa proteinpsbB PSII PGSC0003DMT400016568
CUST_39494_PI426222305	0.95402	4.45166	1.10028	5.26729	0.928262	4.74413	81.3157	677.566	62.4109	456.73	12.7224	85.3705	0.888444	5.03427	0.957109	4.32542	PGSC0003DMT400019031	Chlorophyll a/b-binding protein PS II-Type I	chr08	Chlorophyll a/b-binding protein PS II-Type I	PGSC0003DMP400013055	PGSC0003DMG400007375	PGSC0003DMC400013055	PGSC0003DMT400019031	1.1.1.1	PS.lightreaction.photosystem II.LHC-II	pgsc0003dmp400013055	moderately similar to ( 365) AT1G29930 | Symbols: CAB1, AB140, CAB140, LHCB1.3 | CAB1 (CHLOROPHYLL A/B BINDING PROTEIN 1); chlorophyll binding | chr1:10478071-10478874 FORWARDmoderately similar to ( 413) CB21_TOBAC Chlorophyll a-b binding protein 16, chloroplast precursor (LHCII type I CAB-16) (LHCP) - Nicotiana tabacum (Common tobacco)moderately similar to ( 371) loc_os01g41710 12001.m42672 prot…	GO:0016021;GO:0009536;GO:0009523;GO:0030076;GO:0044446	GO:0046872;GO:0045156	GO:0009772
CUST_31288_PI426222305	0.947771	4.28355	1.02532	4.54961	0.906823	4.4599	39.2842	348.098	31.5578	246.463	9.19396	69.4894	0.99701	5.62969	0.95084	4.42581	PGSC0003DMT400034895	Chlorophyll a-b binding protein 3C, chloroplastic	chr03	Chlorophyll a/b-binding protein PS II-Type I	PGSC0003DMP400023741	PGSC0003DMG400013413	PGSC0003DMC400023741	PGSC0003DMT400034895	1.1.1.1	PS.lightreaction.photosystem II.LHC-II	pgsc0003dmp400023741	moderately similar to ( 290) AT3G27690 | Symbols: LHCB2.4, LHCB2.3, LHCB2 | LHCB2.3; chlorophyll binding | chr3:10256002-10256921 FORWARDmoderately similar to ( 311) CB2A_SPIOL Chlorophyll a-b binding protein, chloroplast precursor (LHCII type I CAB) (LHCP) - Spinacia oleracea (Spinach)moderately similar to ( 306) loc_os01g52240 12001.m11398 protein chlorophyll a-b binding protein 2, chloroplast …	GO:0016021;GO:0009535;GO:0009523;GO:0009522	GO:0046872;GO:0016168	GO:0009765;GO:0018298
CUST_31342_PI426222305	0.9978	5.54423	1.05385	5.48315	0.886632	5.27096	59.5098	607.493	47.5432	354.133	16.4343	147.469	0.927767	5.73166	0.910214	5.03562	PGSC0003DMT400034902	Chlorophyll a-b binding protein 3C, chloroplastic	chr03	Chlorophyll a-b binding protein 3C, chloroplastic	PGSC0003DMP400023748	PGSC0003DMG401013418	PGSC0003DMC400023748	PGSC0003DMT400034902	1.1.1.1	PS.lightreaction.photosystem II.LHC-II	pgsc0003dmp400023748	moderately similar to ( 202) AT1G29930 | Symbols: CAB1, AB140, CAB140, LHCB1.3 | CAB1 (CHLOROPHYLL A/B BINDING PROTEIN 1); chlorophyll binding | chr1:10478071-10478874 FORWARDmoderately similar to ( 229) CB25_TOBAC Chlorophyll a-b binding protein 50, chloroplast precursor (LHCII type I CAB-50) (LHCP) - Nicotiana tabacum (Common tobacco)weakly similar to ( 186) loc_os01g41710 12001.m42672 protein …
CUST_31356_PI426222305	0.943569	3.99478	1.02078	4.14569	1.01266	5.50497	114.688	958.028	156.234	990.359	24.2507	162.796	0.869981	4.36587	0.946624	3.93949	PGSC0003DMT400035007	Chlorophyll a-b binding protein 3C, chloroplastic	chr03	Chlorophyll a-b binding protein 3C, chloroplastic	PGSC0003DMP400023813	PGSC0003DMG400013461	PGSC0003DMC400023813	PGSC0003DMT400035007	1.1.1.1	PS.lightreaction.photosystem II.LHC-II	pgsc0003dmp400023813	moderately similar to ( 291) AT2G34430 | Symbols: LHB1B1, LHCB1.4 | LHB1B1; chlorophyll binding | chr2:14524818-14525618 FORWARDmoderately similar to ( 314) CB2A_SPIOL Chlorophyll a-b binding protein, chloroplast precursor (LHCII type I CAB) (LHCP) - Spinacia oleracea (Spinach)moderately similar to ( 308) loc_os01g52240 12001.m11398 protein chlorophyll a-b binding protein 2, chloroplast precursor…
CUST_31278_PI426222305	0.911596	5.05258	1.06055	5.61034	0.902357	5.41969	15.7811	146.525	20.5646	149.77	6.08692	44.5448	0.95417	5.96038	0.906568	5.07444	PGSC0003DMT400034896	Chlorophyll a-b binding protein 3C, chloroplastic	chr03	Chlorophyll a-b binding protein 3C, chloroplastic	PGSC0003DMP400023742	PGSC0003DMG400013414	PGSC0003DMC400023742	PGSC0003DMT400034896	1.1.1.1	PS.lightreaction.photosystem II.LHC-II	pgsc0003dmp400023742	moderately similar to ( 441) AT1G29930 | Symbols: CAB1, AB140, CAB140, LHCB1.3 | CAB1 (CHLOROPHYLL A/B BINDING PROTEIN 1); chlorophyll binding | chr1:10478071-10478874 FORWARDmoderately similar to ( 482) CB21_TOBAC Chlorophyll a-b binding protein 16, chloroplast precursor (LHCII type I CAB-16) (LHCP) - Nicotiana tabacum (Common tobacco)moderately similar to ( 440) loc_os01g41710 12001.m42672 prot…
CUST_23983_PI426222305	0.916485	8.73377	0.609227	4.81588	0.738311	7.57862	5.50326	78.5062	4.55093	46.5809	2.32074	32.5289	0.720629	7.26475	0.640613	5.71756	PGSC0003DMT400027720	Thylakoid lumenal 21.5 kDa protein, chloroplast	chr01	Thylakoid lumenal 21.5 kDa protein, chloroplast	PGSC0003DMP400018887	PGSC0003DMG400010682	PGSC0003DMC400018887	PGSC0003DMT400027720	1.1.1.2	PS.lightreaction.photosystem II.PSII polypeptide subunits	pgsc0003dmp400018887	moderately similar to ( 292) AT4G15510 | Symbols: | photosystem II reaction center PsbP family protein | chr4:8861351-8862529 FORWARDmoderately similar to ( 283) loc_os07g17390 12007.m06180 protein thylakoid lumenal 21.5 kDa protein, chloroplast precursor, putative, expressedPsbP PGSC0003DMT400027720
CUST_31296_PI426222305	0.947771	4.08472	1.02532	4.21336	0.906823	4.19581	6.6276	55.6795	13.7559	89.5484	3.50098	23.4363	1.02336	5.60844	0.95084	4.03551	PGSC0003DMT400034897	Chlorophyll a-b binding protein 3C, chloroplastic	chr03	Chlorophyll a-b binding protein 3C, chloroplastic	PGSC0003DMP400023743	PGSC0003DMG400013415	PGSC0003DMC400023743	PGSC0003DMT400034897	1.1.1.1	PS.lightreaction.photosystem II.LHC-II	pgsc0003dmp400023743	moderately similar to ( 440) AT1G29930 | Symbols: CAB1, AB140, CAB140, LHCB1.3 | CAB1 (CHLOROPHYLL A/B BINDING PROTEIN 1); chlorophyll binding | chr1:10478071-10478874 FORWARDmoderately similar to ( 482) CB24_TOBAC Chlorophyll a-b binding protein 40, chloroplast precursor (LHCII type I CAB-40) (LHCP) - Nicotiana tabacum (Common tobacco)moderately similar to ( 433) loc_os01g41710 12001.m42672 prot…
CUST_46897_PI426222305	0.870799	5.48948	0.91972	5.44648	0.74812	5.12054	3.312	37.2266	2.26592	18.3786	1.9088	19.5449	0.669236	4.59341	0.870736	5.40886	PGSC0003DMT400059214	Endopeptidase	chr03	Conserved gene of unknown function	PGSC0003DMP400039877	PGSC0003DMG400023001	PGSC0003DMC400039877	PGSC0003DMT400059214	1.1.1.2	PS.lightreaction.photosystem II.PSII polypeptide subunits	pgsc0003dmp400039877	very weakly similar to (95.1) AT5G51545 | Symbols: LPA2 | LPA2 (low psii accumulation2) | chr5:20936434-20937243 FORWARDvery weakly similar to (89.0) loc_os02g03250 12002.m05675 protein expressed protein PGSC0003DMT400059214
CUST_31139_PI426222305	0.931708	6.41205	1.34105	9.53335	0.753532	4.98805	11.9662	168.227	5.66428	43.1784	3.29134	69.5503	0.754914	5.41247	0.945839	6.19551	PGSC0003DMT400063835	Thylakoid lumenal 29.8 kDa protein, chloroplast	chr04	Thylakoid lumenal 29.8 kDa protein, chloroplast	PGSC0003DMP400043004	PGSC0003DMG401024815	PGSC0003DMC400043004	PGSC0003DMT400063835	1.1.1.2	PS.lightreaction.photosystem II.PSII polypeptide subunits	pgsc0003dmp400043004	moderately similar to ( 340) AT1G77090 | Symbols: | thylakoid lumenal 29.8 kDa protein | chr1:28960576-28961875 REVERSEmoderately similar to ( 317) loc_os12g08830 12012.m26739 protein tat pathway signal sequence family protein, expressed PGSC0003DMT400063835
CUST_28793_PI426222305	0.977964	4.49216	1.18468	5.66389	0.925987	4.50103	8.856	133.495	5.48938	34.3871	2.90612	60.3319	0.899046	4.65501	0.970934	4.47438	PGSC0003DMT400083158	Chlorophyll a/b-binding protein (cab-12)	chr06	Chlorophyll a/b-binding protein (cab-12)	PGSC0003DMP400055858	PGSC0003DMG400033084	PGSC0003DMC400055858	PGSC0003DMT400083158	1.1.1.1	PS.lightreaction.photosystem II.LHC-II	pgsc0003dmp400055858	moderately similar to ( 437) AT3G47470 | Symbols: LHCA4, CAB4 | LHCA4 (LIGHT-HARVESTING CHLOROPHYLL-PROTEIN COMPLEX I SUBUNIT A4); chlorophyll binding | chr3:17493622-17494773 REVERSEmoderately similar to ( 226) CB12_PETHY Chlorophyll a-b binding protein, chloroplast precursor (LHCI type II CAB) - Petunia hybrida (Petunia)moderately similar to ( 387) loc_os08g33820 12008.m080044 protein chlorophy…	GO:0016021;GO:0009941;GO:0010287;GO:0009535;GO:0009523;GO:0009522	GO:0046872;GO:0016168	GO:0009765;GO:0018298
CUST_29650_PI426222305	0.99063	4.99949	1.49878	7.86806	0.929468	4.8725	24.8535	325.993	9.88508	62.4391	3.11307	110.626	0.921923	5.2139	0.99587	5.1372	PGSC0003DMT400047435	Oxygen evolving enhancer protein 3	chr05	Oxygen evolving enhancer protein 3	PGSC0003DMP400032116	PGSC0003DMG400018434	PGSC0003DMC400032116	PGSC0003DMT400047435	1.1.1.2	PS.lightreaction.photosystem II.PSII polypeptide subunits	pgsc0003dmp400032116	weakly similar to ( 134) AT1G14150 | Symbols: | oxygen evolving enhancer 3 (PsbQ) family protein | chr1:4839885-4840632 FORWARDweakly similar to ( 125) loc_os02g36850 12002.m08772 protein oxygen evolving enhancer protein 3, putative, expressedPsbQ PGSC0003DMT400047435	GO:0048046;GO:0009570;GO:0009535;GO:0009543;GO:0019898;GO:0009654	GO:0005509	GO:0015979
CUST_31364_PI426222305	0.974905	4.51418	1.06668	4.60584	0.939226	4.64758	4.83456	53.5998	4.20777	36.9026	1.61732	17.0494	1.14467	6.57046	0.978061	4.49678	PGSC0003DMT400034898	Chlorophyll a-b binding protein 3C, chloroplastic	chr03	Chlorophyll a-b binding protein 3C, chloroplastic	PGSC0003DMP400023744	PGSC0003DMG400013416	PGSC0003DMC400023744	PGSC0003DMT400034898	1.1.1.1	PS.lightreaction.photosystem II.LHC-II	pgsc0003dmp400023744	moderately similar to ( 421) AT1G29930 | Symbols: CAB1, AB140, CAB140, LHCB1.3 | CAB1 (CHLOROPHYLL A/B BINDING PROTEIN 1); chlorophyll binding | chr1:10478071-10478874 FORWARDmoderately similar to ( 471) CB25_TOBAC Chlorophyll a-b binding protein 50, chloroplast precursor (LHCII type I CAB-50) (LHCP) - Nicotiana tabacum (Common tobacco)moderately similar to ( 420) loc_os01g41710 12001.m42672 prot…
CUST_14352_PI426222305	0.944842	4.87942	1.04982	4.91792	0.934701	4.95656	7.45922	62.2301	5.557	38.1816	1.62288	17.1505	0.911174	5.25876	1.11436	6.06363	PGSC0003DMT400059995	Chlorophyll a-b binding protein 6A, chloroplastic	chr05	Chlorophyll a-b binding protein 6A, chloroplastic	PGSC0003DMP400040356	PGSC0003DMG400023344	PGSC0003DMC400040356	PGSC0003DMT400059995	1.1.1.1	PS.lightreaction.photosystem II.LHC-II	pgsc0003dmp400040356	moderately similar to ( 360) AT3G54890 | Symbols: LHCA1 | LHCA1; chlorophyll binding | chr3:20339881-20340922 REVERSEweakly similar to ( 120) CB21_SINAL Chlorophyll a-b binding protein 1, chloroplast precursor (LHCII type I CAB-1) (LHCP) - Sinapis alba (White mustard) (Brassica hirta)moderately similar to ( 345) loc_os06g21590 12006.m32064 protein chlorophyll a-b binding protein 6A, chloroplast p…	GO:0019898;GO:0009654	GO:0005509	GO:0015979
CUST_23890_PI426222305	0.445289	6.17676	0.557942	7.71737	0.506721	7.09038	4.43052	98.9119	3.593	56.7341	1.27804	24.9368	0.727237	11.9828	0.702581	10.4101	PGSC0003DMT400027723	Thylakoid lumenal 21.5 kDa protein, chloroplast	chr01	Thylakoid lumenal 21.5 kDa protein, chloroplast	PGSC0003DMP400018890	PGSC0003DMG400010682	PGSC0003DMC400018890	PGSC0003DMT400027723	1.1.1.2	PS.lightreaction.photosystem II.PSII polypeptide subunits	pgsc0003dmp400018890	moderately similar to ( 297) AT4G15510 | Symbols: | photosystem II reaction center PsbP family protein | chr4:8861351-8862529 FORWARDmoderately similar to ( 286) loc_os07g17390 12007.m06180 protein thylakoid lumenal 21.5 kDa protein, chloroplast precursor, putative, expressedPsbP PGSC0003DMT400027723
CUST_7841_PI426222305	0.471846	8.52702	0.631519	9.80298	0.726	13.4176	4.11238	161.243	2.4988	45.6188	2.23096	63.3708	0.310117	5.31611	0.3943	6.45271	PGSC0003DMT400025715	Light-harvesting complex II protein Lhcb7	chr04	Light-harvesting complex II protein Lhcb7	PGSC0003DMP400017529	PGSC0003DMG401009929	PGSC0003DMC400017529	PGSC0003DMT400025715	1.1.1.1	PS.lightreaction.photosystem II.LHC-II	pgsc0003dmp400017529	moderately similar to ( 497) AT1G76570 | Symbols: | chlorophyll A-B binding family protein | chr1:28729132-28730754 FORWARDmoderately similar to ( 209) CB23_TOBAC Chlorophyll a-b binding protein 36, chloroplast precursor (LHCII type I CAB-36) (LHCP) - Nicotiana tabacum (Common tobacco)moderately similar to ( 436) loc_os09g12540 12009.m04517 protein chlorophyll a-b binding protein, chloroplast pre…
CUST_7383_PI426222305	0.500457	8.27334	1.02113	15.428	0.728482	11.7002	4.4189	171.127	2.53454	46.0794	3.03789	73.0389	0.345315	5.66008	0.492991	8.80234	PGSC0003DMT400025714	Light-harvesting complex II protein Lhcb7	chr04	Light-harvesting complex II protein Lhcb7	PGSC0003DMP400017528	PGSC0003DMG401009929	PGSC0003DMC400017528	PGSC0003DMT400025714	1.1.1.1	PS.lightreaction.photosystem II.LHC-II	pgsc0003dmp400017528	moderately similar to ( 304) AT1G76570 | Symbols: | chlorophyll A-B binding family protein | chr1:28729132-28730754 FORWARDweakly similar to ( 137) CB25_NICPL Chlorophyll a-b binding protein E, chloroplast precursor (LHCII type I CAB-E) (LHCP) - Nicotiana plumbaginifolia (Leadwort-leaved tobacco)moderately similar to ( 280) loc_os09g12540 12009.m04517 protein chlorophyll a-b binding protein, chlo…
CUST_7416_PI426222305	0.662728	7.45541	1.79574	30.9061	0.608487	7.54523	5.59517	146.573	3.82162	49.5662	4.19525	76.7976	0.523685	6.6477	0.721546	8.47302	PGSC0003DMT400025713	Light-harvesting complex II protein Lhcb7	chr04	Light-harvesting complex II protein Lhcb7	PGSC0003DMP400017527	PGSC0003DMG401009929	PGSC0003DMC400017527	PGSC0003DMT400025713	1.1.1.1	PS.lightreaction.photosystem II.LHC-II	pgsc0003dmp400017527	moderately similar to ( 410) AT1G76570 | Symbols: | chlorophyll A-B binding family protein | chr1:28729132-28730754 FORWARDmoderately similar to ( 207) CB2_PHYPA Chlorophyll a-b binding protein, chloroplast precursor (LHCII type I CAB) (LHCP) - Physcomitrella patens (Moss)moderately similar to ( 382) loc_os09g12540 12009.m04517 protein chlorophyll a-b binding protein, chloroplast precursor, putat…
CUST_23954_PI426222305	0.791205	7.38148	2.18367	19.085	0.756418	7.38702	6.68278	154.383	3.84331	39.0057	1.98485	83.1193	0.5435	5.31686	0.565847	4.93453	PGSC0003DMT400032791	Chlorophyll a-b binding protein CP24 10A, chloroplastic	chr01	Chlorophyll a-b binding protein CP24 10A, chloroplastic	PGSC0003DMP400022301	PGSC0003DMG400012591	PGSC0003DMC400022301	PGSC0003DMT400032791	1.1.1.1	PS.lightreaction.photosystem II.LHC-II	pgsc0003dmp400022301	moderately similar to ( 369) AT1G15820 | Symbols: LHCB6, CP24 | LHCB6 (LIGHT HARVESTING COMPLEX PSII SUBUNIT 6); chlorophyll binding | chr1:5446685-5447676 REVERSEmoderately similar to ( 367) CB4_SPIOL Chlorophyll a-b binding protein CP24, chloroplast precursor - Spinacia oleracea (Spinach)moderately similar to ( 346) loc_os04g38410 12004.m08831 protein chlorophyll a-b binding protein CP24, chlor…
CUST_37143_PI426222305	0.971066	4.50899	1.37105	6.81901	1.03626	5.36882	6.89764	96.3095	1.69687	9.84689	1.99135	29.2378	0.895333	4.72551	1.05208	5.01514	PGSC0003DMT400082424	PsbP domain-containing protein 2, chloroplastic	chr04	PsbP domain-containing protein 2, chloroplastic	PGSC0003DMP400055577	PGSC0003DMG400032538	PGSC0003DMC400055577	PGSC0003DMT400082424	1.1.1.2	PS.lightreaction.photosystem II.PSII polypeptide subunits	pgsc0003dmp400055577	moderately similar to ( 225) AT2G28605 | Symbols: | Encodes a PsbP domain-OEC23 like protein localized in thylakoid (peripheral-lumenal side). | chr2:12254911-12255689 FORWARDweakly similar to ( 108) loc_os04g35530 12004.m08642 protein expressed protein PGSC0003DMT400082424
CUST_31389_PI426222305	1.25098	6.00762	1.07678	4.123	0.95233	4.08246	3.01887	47.9638	1.72796	14.6665	1.5891	15.141	0.917708	4.34903	0.998555	3.9082	PGSC0003DMT400034899	Chlorophyll a-b binding protein 3C, chloroplastic	chr03	Chlorophyll a-b binding protein 3C, chloroplastic	PGSC0003DMP400023745	PGSC0003DMG400013417	PGSC0003DMC400023745	PGSC0003DMT400034899	1.1.1.1	PS.lightreaction.photosystem II.LHC-II	pgsc0003dmp400023745	moderately similar to ( 457) AT1G29930 | Symbols: CAB1, AB140, CAB140, LHCB1.3 | CAB1 (CHLOROPHYLL A/B BINDING PROTEIN 1); chlorophyll binding | chr1:10478071-10478874 FORWARDhighly similar to ( 502) CB24_TOBAC Chlorophyll a-b binding protein 40, chloroplast precursor (LHCII type I CAB-40) (LHCP) - Nicotiana tabacum (Common tobacco)moderately similar to ( 456) loc_os01g41710 12001.m42672 protein …
CUST_30715_PI426222305	0.9678	3.8463	1.21118	5.14922	0.925987	3.89244	4.81226	46.3405	2.2164	13.019	1.38556	11.6948	0.892322	4.25188	0.970934	3.76459	PGSC0003DMT400022131	Photosystem II reaction center psb28 protein	chr09	Photosystem II reaction center psb28 protein	PGSC0003DMP400015087	PGSC0003DMG400008585	PGSC0003DMC400015087	PGSC0003DMT400022131	1.1.1.2	PS.lightreaction.photosystem II.PSII polypeptide subunits	pgsc0003dmp400015087	moderately similar to ( 208) AT4G28660 | Symbols: PSB28 | PSB28 (PHOTOSYSTEM II REACTION CENTER PSB28 PROTEIN) | chr4:14150008-14150933 FORWARDmoderately similar to ( 214) loc_os01g71190 12001.m13162 protein photosystem II reaction center W protein, putative, expressedpsbW Psb28 PGSC0003DMT400022131
CUST_28254_PI426222305	1.10207	58.5272	0.943651	45.977	0.857917	47.6267	1.26607	105.757	1.78631	105.282	1.07316	70.2918	0.9049	51.9152	0.943146	51.1261	PGSC0003DMT400044462	Photosystem II D2 protein	chr09	Photosystem II D2 protein	PGSC0003DMP400030162	PGSC0003DMG400017258	PGSC0003DMC400030162	PGSC0003DMT400044462	1.1.1.2	PS.lightreaction.photosystem II.PSII polypeptide subunits	pgsc0003dmp400030162	moderately similar to ( 442) ATCG00270 | Symbols: PSBD | PSII D2 protein | chrC:32711-33772 FORWARDmoderately similar to ( 449) PSBD_TOBAC Photosystem II D2 protein (Photosystem Q(A) protein) (PSII D2 protein) - Nicotiana tabacum (Common tobacco)moderately similar to ( 442) loc_osp1g00170 11562.m00006 protein photosystem II protein D2psbD Photo_RC psbA PGSC0003DMT400044462	GO:0016021;GO:0009535;GO:0009523;GO:0009522	GO:0046872;GO:0016168	GO:0009765;GO:0018298
CUST_7410_PI426222305	0.803354	9.69275	1.03659	11.0103	0.423787	4.62581	1.59089	33.8286	1.26178	16.0398	1.51357	21.4349	0.507103	6.4922	0.630085	7.47012	PGSC0003DMT400025716	Light-harvesting complex II protein Lhcb7	chr04	Light-harvesting complex II protein Lhcb7	PGSC0003DMP400017530	PGSC0003DMG401009929	PGSC0003DMC400017530	PGSC0003DMT400025716	1.1.1.1	PS.lightreaction.photosystem II.LHC-II	pgsc0003dmp400017530	very weakly similar to (82.8) AT1G76570 | Symbols: | chlorophyll A-B binding family protein | chr1:28729132-28730754 FORWARD PGSC0003DMT400025716
CUST_4091_PI426222305	0.921812	24.4799	1.09725	27.3668	0.462486	15.419	1.98371	100.462	1.45164	45.1045	1.457	49.582	0.355403	11.2131	0.561534	15.017	PGSC0003DMT400041003	Photosystem Q(B) protein	chr01	Photosystem Q(B) protein	PGSC0003DMP400027801	PGSC0003DMG400015861	PGSC0003DMC400027801	PGSC0003DMT400041003	1.1.1.2	PS.lightreaction.photosystem II.PSII polypeptide subunits	pgsc0003dmp400027801	moderately similar to ( 273) ATCG00020 | Symbols: PSBA | Encodes chlorophyll binding protein D1, a part of the photosystem II reaction center core | chrC:383-1444 REVERSEmoderately similar to ( 273) PSBA_BRANA Photosystem Q(B) protein (32 kDa thylakoid membrane protein) (Photosystem II protein D1) (Triazine-resistance protein) - Brassica napus (Rape)moderately similar to ( 271) loc_os08g35420 120…
CUST_52636_PI426222305	0.96755	4853.01	1.0244	5156.83	0.843337	4431.35	3.07287	23363.6	4.67718	25725.6	1.86193	11494.8	0.0558252	298.128	0.081996	426.604	PGSC0003DMT400022698	Chlorophyll a/b binding protein		Chlorophyll a/b binding protein	PGSC0003DMP400015464	PGSC0003DMG400008804	PGSC0003DMC400015464	PGSC0003DMT400022698	1.1.1.1	PS.lightreaction.photosystem II.LHC-II	pgsc0003dmp400015464	moderately similar to ( 427) AT1G29930 | Symbols: CAB1, AB140, CAB140, LHCB1.3 | CAB1 (CHLOROPHYLL A/B BINDING PROTEIN 1); chlorophyll binding | chr1:10478071-10478874 FORWARDmoderately similar to ( 466) CB22_TOBAC Chlorophyll a-b binding protein 21, chloroplast precursor (LHCII type I CAB-21) (LHCP) - Nicotiana tabacum (Common tobacco)moderately similar to ( 419) loc_os01g52240 12001.m11398 prot…
CUST_47360_PI426222305	0.991817	4366.63	1.0386	4482.94	0.78917	3660.38	3.12063	20620.3	4.55802	22313.3	1.89792	10081.4	0.0636231	296.741	0.0780617	371.297	PGSC0003DMT400092927	Chlorophyll a/b binding protein	chr02	Chlorophyll a/b binding protein	PGSC0003DMP400064602	PGSC0003DMG400042498	PGSC0003DMC400064602	PGSC0003DMT400092927	1.1.1.1	PS.lightreaction.photosystem II.LHC-II	pgsc0003dmp400064602	moderately similar to ( 444) AT1G29930 | Symbols: CAB1, AB140, CAB140, LHCB1.3 | CAB1 (CHLOROPHYLL A/B BINDING PROTEIN 1); chlorophyll binding | chr1:10478071-10478874 FORWARDmoderately similar to ( 485) CB22_TOBAC Chlorophyll a-b binding protein 21, chloroplast precursor (LHCII type I CAB-21) (LHCP) - Nicotiana tabacum (Common tobacco)moderately similar to ( 436) loc_os01g52240 12001.m11398 prot…	GO:0016021;GO:0009535;GO:0009523;GO:0009522	GO:0046872;GO:0016168	GO:0009765;GO:0018298
CUST_47354_PI426222305	0.956152	4134.65	0.990105	4214.36	0.700047	3146.7	3.25638	20579.5	4.6008	22186.4	1.9737	10255.1	0.0364216	163.497	0.0582694	265.328	PGSC0003DMT400021390	Chlorophyll a/b binding protein	chr02	Chlorophyll a/b binding protein	PGSC0003DMP400014556	PGSC0003DMG400008299	PGSC0003DMC400014556	PGSC0003DMT400021390	1.1.1.1	PS.lightreaction.photosystem II.LHC-II	pgsc0003dmp400014556	moderately similar to ( 438) AT2G34430 | Symbols: LHB1B1, LHCB1.4 | LHB1B1; chlorophyll binding | chr2:14524818-14525618 FORWARDmoderately similar to ( 477) CB22_TOBAC Chlorophyll a-b binding protein 21, chloroplast precursor (LHCII type I CAB-21) (LHCP) - Nicotiana tabacum (Common tobacco)moderately similar to ( 429) loc_os01g52240 12001.m11398 protein chlorophyll a-b binding protein 2, chloropl…
CUST_52635_PI426222305	0.966323	3334.9	0.811042	2640.03	0.704232	2507.74	3.42003	16911.1	4.76643	17689.3	2.02463	8293.93	0.02306	82.2453	0.0286666	112.66	PGSC0003DMT400022700	Chlorophyll a/b binding protein		Chlorophyll a/b binding protein	PGSC0003DMP400015466	PGSC0003DMG400008804	PGSC0003DMC400015466	PGSC0003DMT400022700	1.1.1.1	PS.lightreaction.photosystem II.LHC-II	pgsc0003dmp400015466	moderately similar to ( 424) AT2G34430 | Symbols: LHB1B1, LHCB1.4 | LHB1B1; chlorophyll binding | chr2:14524818-14525618 FORWARDmoderately similar to ( 462) CB22_TOBAC Chlorophyll a-b binding protein 21, chloroplast precursor (LHCII type I CAB-21) (LHCP) - Nicotiana tabacum (Common tobacco)moderately similar to ( 416) loc_os01g52240 12001.m11398 protein chlorophyll a-b binding protein 2, chloropl…	GO:0016021;GO:0009941;GO:0010287;GO:0009535;GO:0009523	GO:0046872;GO:0016168	GO:0009765;GO:0018298;GO:0010196
CUST_31290_PI426222305	0.659129	72.1294	0.768858	72.4036	0.656671	62.9597	2.88218	438.002	2.89525	329.09	1.7147	192.406	0.0523127	4.21749	0.0569213	4.30053	PGSC0003DMT400034892	Chlorophyll a-b binding protein 3C, chloroplastic	chr03	Chlorophyll a-b binding protein 3C, chloroplastic	PGSC0003DMP400023738	PGSC0003DMG400013411	PGSC0003DMC400023738	PGSC0003DMT400034892	1.1.1.1	PS.lightreaction.photosystem II.LHC-II	pgsc0003dmp400023738	moderately similar to ( 439) AT1G29930 | Symbols: CAB1, AB140, CAB140, LHCB1.3 | CAB1 (CHLOROPHYLL A/B BINDING PROTEIN 1); chlorophyll binding | chr1:10478071-10478874 FORWARDmoderately similar to ( 480) CB24_TOBAC Chlorophyll a-b binding protein 40, chloroplast precursor (LHCII type I CAB-40) (LHCP) - Nicotiana tabacum (Common tobacco)moderately similar to ( 433) loc_os01g41710 12001.m42672 prot…
CUST_47342_PI426222305	1.00578	6613.58	1.11105	7297.93	0.760385	5247.14	2.62455	26487.4	3.90309	28941.7	1.74933	14338.7	0.0210359	154.224	0.0355776	259.977	PGSC0003DMT400021389	Chlorophyll a/b binding protein	chr02	Chlorophyll a/b binding protein	PGSC0003DMP400014555	PGSC0003DMG400008298	PGSC0003DMC400014555	PGSC0003DMT400021389	1.1.1.1	PS.lightreaction.photosystem II.LHC-II	pgsc0003dmp400014555	moderately similar to ( 444) AT2G34430 | Symbols: LHB1B1, LHCB1.4 | LHB1B1; chlorophyll binding | chr2:14524818-14525618 FORWARDmoderately similar to ( 482) CB22_TOBAC Chlorophyll a-b binding protein 21, chloroplast precursor (LHCII type I CAB-21) (LHCP) - Nicotiana tabacum (Common tobacco)moderately similar to ( 436) loc_os01g52240 12001.m11398 protein chlorophyll a-b binding protein 2, chloropl…
CUST_31383_PI426222305	1.16854	4520.25	1.17548	4459.21	0.866801	3570.12	2.44687	14422.3	3.57478	15244.3	1.63476	7716.04	0.0243377	103.509	0.0264619	114.168	PGSC0003DMT400034894	Chlorophyll a/b-binding protein PS II-Type I	chr03	Chlorophyll a/b-binding protein PS II-Type I	PGSC0003DMP400023740	PGSC0003DMG400013413	PGSC0003DMC400023740	PGSC0003DMT400034894	1.1.1.1	PS.lightreaction.photosystem II.LHC-II	pgsc0003dmp400023740	moderately similar to ( 228) AT3G27690 | Symbols: LHCB2.4, LHCB2.3, LHCB2 | LHCB2.3; chlorophyll binding | chr3:10256002-10256921 FORWARDmoderately similar to ( 244) CB2A_SPIOL Chlorophyll a-b binding protein, chloroplast precursor (LHCII type I CAB) (LHCP) - Spinacia oleracea (Spinach)moderately similar to ( 242) loc_os01g52240 12001.m11398 protein chlorophyll a-b binding protein 2, chloroplast …
CUST_31303_PI426222305	1.09784	10717.4	1.16167	11229.1	0.888389	9198.72	1.95537	29543.8	3.00521	32510	1.53164	18308.4	0.0171182	190.042	0.0226497	245.34	PGSC0003DMT400035006	Chlorophyll a-b binding protein 3C, chloroplastic	chr03	Chlorophyll a-b binding protein 3C, chloroplastic	PGSC0003DMP400023812	PGSC0003DMG400013460	PGSC0003DMC400023812	PGSC0003DMT400035006	1.1.1.1	PS.lightreaction.photosystem II.LHC-II	pgsc0003dmp400023812	moderately similar to ( 291) AT2G34430 | Symbols: LHB1B1, LHCB1.4 | LHB1B1; chlorophyll binding | chr2:14524818-14525618 FORWARDmoderately similar to ( 314) CB2A_SPIOL Chlorophyll a-b binding protein, chloroplast precursor (LHCII type I CAB) (LHCP) - Spinacia oleracea (Spinach)moderately similar to ( 308) loc_os01g52240 12001.m11398 protein chlorophyll a-b binding protein 2, chloroplast precursor…	GO:0009543;GO:0030095	GO:0003674	GO:0010207;GO:0006364;GO:0035304;GO:0010206;GO:0009657
CUST_31270_PI426222305	0.974237	517.676	1.07718	567.383	0.812245	447.38	2.13591	1701.56	3.02769	1747.63	1.54263	979.104	0.0117515	6.70131	0.0236105	14.1263	PGSC0003DMT400035005	Chlorophyll a-b binding protein 3C	chr03	Chlorophyll a-b binding protein 3C, chloroplastic	PGSC0003DMP400023811	PGSC0003DMG400013460	PGSC0003DMC400023811	PGSC0003DMT400035005	1.1.1.1	PS.lightreaction.photosystem II.LHC-II	pgsc0003dmp400023811	weakly similar to ( 109) AT1G29930 | Symbols: CAB1, AB140, CAB140, LHCB1.3 | CAB1 (CHLOROPHYLL A/B BINDING PROTEIN 1); chlorophyll binding | chr1:10478071-10478874 FORWARDweakly similar to ( 127) CB25_TOBAC Chlorophyll a-b binding protein 50, chloroplast precursor (LHCII type I CAB-50) (LHCP) - Nicotiana tabacum (Common tobacco)very weakly similar to (94.4) loc_os01g41710 12001.m42672 protein chl…	GO:0016021;GO:0009523;GO:0009517	GO:0016168;GO:0051738	GO:0010027;GO:0015979;GO:0010196
CUST_24374_PI426222305	1.00016	222.556	1.5819	310.317	0.282904	64.2851	4.6621	1349.65	4.67327	1044.02	1.7001	399.077	0.0421752	9.22989	0.117809	27.587	PGSC0003DMT400010985	Chlorophyll a,b binding protein type I	chr12	Chlorophyll a,b binding protein type I	PGSC0003DMP400007654	PGSC0003DMG400004301	PGSC0003DMC400007654	PGSC0003DMT400010985	1.1.1.1	PS.lightreaction.photosystem II.LHC-II	pgsc0003dmp400007654	moderately similar to ( 477) AT2G05100 | Symbols: LHCB2.1, LHCB2 | LHCB2.1; chlorophyll binding | chr2:1823449-1824331 REVERSEhighly similar to ( 513) CB23_TOBAC Chlorophyll a-b binding protein 36, chloroplast precursor (LHCII type I CAB-36) (LHCP) - Nicotiana tabacum (Common tobacco)moderately similar to ( 464) loc_os03g39610 12003.m35304 protein chlorophyll a-b binding protein, chloroplast prec…	GO:0016021;GO:0009535;GO:0009523;GO:0009522	GO:0046872;GO:0016168	GO:0009765;GO:0018298
CUST_52634_PI426222305	0.783953	1521.54	0.817688	1584.54	0.848498	1781.96	3.94731	11401.1	6.07518	12798.3	2.04351	4869.55	0.100916	204.897	0.135266	266.755	PGSC0003DMT400022699	Chlorophyll a/b binding protein		Chlorophyll a/b binding protein	PGSC0003DMP400015465	PGSC0003DMG400008804	PGSC0003DMC400015465	PGSC0003DMT400022699	1.1.1.1	PS.lightreaction.photosystem II.LHC-II	pgsc0003dmp400015465	moderately similar to ( 446) AT1G29930 | Symbols: CAB1, AB140, CAB140, LHCB1.3 | CAB1 (CHLOROPHYLL A/B BINDING PROTEIN 1); chlorophyll binding | chr1:10478071-10478874 FORWARDmoderately similar to ( 487) CB22_TOBAC Chlorophyll a-b binding protein 21, chloroplast precursor (LHCII type I CAB-21) (LHCP) - Nicotiana tabacum (Common tobacco)moderately similar to ( 439) loc_os01g52240 12001.m11398 prot…	GO:0009570;GO:0009535;GO:0009543;GO:0019898;GO:0009654	GO:0005509	GO:0048564
CUST_47369_PI426222305	0.777518	1969.86	0.859596	2188.87	0.863014	2388.44	3.97488	15287.4	6.30004	17464.2	2.04168	6414.91	0.0996259	271.611	0.143465	369.961	PGSC0003DMT400021422	Chlorophyll a/b binding protein	chr02	Chlorophyll a/b binding protein	PGSC0003DMP400014577	PGSC0003DMG400008309	PGSC0003DMC400014577	PGSC0003DMT400021422	1.1.1.1	PS.lightreaction.photosystem II.LHC-II	pgsc0003dmp400014577	moderately similar to ( 447) AT1G29930 | Symbols: CAB1, AB140, CAB140, LHCB1.3 | CAB1 (CHLOROPHYLL A/B BINDING PROTEIN 1); chlorophyll binding | chr1:10478071-10478874 FORWARDmoderately similar to ( 487) CB22_TOBAC Chlorophyll a-b binding protein 21, chloroplast precursor (LHCII type I CAB-21) (LHCP) - Nicotiana tabacum (Common tobacco)moderately similar to ( 439) loc_os01g52240 12001.m11398 prot…
CUST_47355_PI426222305	0.886806	2415.96	0.951612	2597.99	0.706488	2086.15	4.93727	20004.8	7.48134	22121.4	2.26187	7383.95	0.111053	315.322	0.183247	523.06	PGSC0003DMT400021388	Chlorophyll a-b binding protein 1B, chloroplastic	chr02	Chlorophyll a-b binding protein 1B, chloroplastic	PGSC0003DMP400014554	PGSC0003DMG400008297	PGSC0003DMC400014554	PGSC0003DMT400021388	1.1.1.1	PS.lightreaction.photosystem II.LHC-II	pgsc0003dmp400014554	moderately similar to ( 291) AT3G27690 | Symbols: LHCB2.4, LHCB2.3, LHCB2 | LHCB2.3; chlorophyll binding | chr3:10256002-10256921 FORWARDmoderately similar to ( 313) CB24_TOBAC Chlorophyll a-b binding protein 40, chloroplast precursor (LHCII type I CAB-40) (LHCP) - Nicotiana tabacum (Common tobacco)moderately similar to ( 306) loc_os01g52240 12001.m11398 protein chlorophyll a-b binding protein 2,…
CUST_45794_PI426222305	0.903212	109.58	1.27978	162.671	0.627216	86.8655	10.0398	1739.72	14.3405	1780.99	3.21592	446.346	0.0626487	8.26373	0.124837	19.2449	PGSC0003DMT400050232	Chlorophyll a/b binding protein	chr03	Chlorophyll a/b binding protein	PGSC0003DMP400033906	PGSC0003DMG400019508	PGSC0003DMC400033906	PGSC0003DMT400050232	1.1.1.1	PS.lightreaction.photosystem II.LHC-II	pgsc0003dmp400033906	moderately similar to ( 444) AT3G47470 | Symbols: LHCA4, CAB4 | LHCA4 (LIGHT-HARVESTING CHLOROPHYLL-PROTEIN COMPLEX I SUBUNIT A4); chlorophyll binding | chr3:17493622-17494773 REVERSEmoderately similar to ( 231) CB12_PETHY Chlorophyll a-b binding protein, chloroplast precursor (LHCI type II CAB) - Petunia hybrida (Petunia)moderately similar to ( 385) loc_os08g33820 12008.m080044 protein chlorophy…
CUST_37646_PI426222305	0.857372	82.8708	1.48181	142.821	0.591671	66.2135	7.60599	1089.67	10.1029	1061.75	3.75078	424.291	0.118878	12.7482	0.135573	15.47	PGSC0003DMT400049550	Chlorophyll a-b binding protein 13, chloroplastic	chr07	Chlorophyll a-b binding protein 13, chloroplastic	PGSC0003DMP400033445	PGSC0003DMG400019248	PGSC0003DMC400033445	PGSC0003DMT400049550	1.1.1.1	PS.lightreaction.photosystem II.LHC-II	pgsc0003dmp400033445	moderately similar to ( 467) AT5G54270 | Symbols: LHCB3, LHCB3*1 | LHCB3 (LIGHT-HARVESTING CHLOROPHYLL B-BINDING PROTEIN 3); structural molecule | chr5:22038424-22039383 FORWARDmoderately similar to ( 445) CB23_HORVU Chlorophyll a-b binding protein of LHCII type III, chloroplast precursor (CAB) - Hordeum vulgare (Barley)moderately similar to ( 452) loc_os07g37550 12007.m079717 protein chlorophyll…	GO:0009535;GO:0009654		GO:0010270
CUST_47343_PI426222305	0.703639	19.436	0.718452	21.6165	1.092	35.3522	5.44394	231.347	7.02628	216.13	2.09774	71.1998	0.203509	6.30135	0.231536	6.19473	PGSC0003DMT400021392	Chlorophyll a/b binding protein	chr02	Chlorophyll a/b binding protein	PGSC0003DMP400014558	PGSC0003DMG400008301	PGSC0003DMC400014558	PGSC0003DMT400021392	1.1.1.1	PS.lightreaction.photosystem II.LHC-II	pgsc0003dmp400014558	moderately similar to ( 447) AT1G29930 | Symbols: CAB1, AB140, CAB140, LHCB1.3 | CAB1 (CHLOROPHYLL A/B BINDING PROTEIN 1); chlorophyll binding | chr1:10478071-10478874 FORWARDmoderately similar to ( 492) CB22_TOBAC Chlorophyll a-b binding protein 21, chloroplast precursor (LHCII type I CAB-21) (LHCP) - Nicotiana tabacum (Common tobacco)moderately similar to ( 440) loc_os01g41710 12001.m42672 prot…
CUST_33847_PI426222305	0.703731	94.8893	1.38948	190.308	0.516368	76.3951	3.10345	589.739	3.9346	537.306	1.57547	236.754	0.295023	44.6078	0.720676	95.7147	PGSC0003DMT400068129	Type I (26 kD) CP29 polypeptide	chr06	Type I (26 kD) CP29 polypeptide	PGSC0003DMP400046029	PGSC0003DMG400026500	PGSC0003DMC400046029	PGSC0003DMT400068129	1.1.1.1	PS.lightreaction.photosystem II.LHC-II	pgsc0003dmp400046029	moderately similar to ( 410) AT4G10340 | Symbols: LHCB5 | LHCB5 (LIGHT HARVESTING COMPLEX OF PHOTOSYSTEM II 5); chlorophyll binding | chr4:6408200-6409496 FORWARDweakly similar to ( 194) CB2B_PINSY Chlorophyll a-b binding protein type 2 member 1B, chloroplast precursor (Chlorophyll a-b binding protein type II 1B) (CAB) (LHCP) - Pinus sylvestris (Scots pine)moderately similar to ( 400) loc_os11g13…
CUST_26844_PI426222305	0.930262	639.684	1.15305	733.565	0.965756	693.078	1.986	2106.86	2.30485	1762.7	1.56565	1344.01	0.66935	503.317	0.770488	530.357	PGSC0003DMT400094795	Photosystem Q(B) protein	chr07	Photosystem Q(B) protein	PGSC0003DMP400066470	PGSC0003DMG400044366	PGSC0003DMC400066470	PGSC0003DMT400094795	1.1.1.2	PS.lightreaction.photosystem II.PSII polypeptide subunits	pgsc0003dmp400066470	moderately similar to ( 276) ATCG00020 | Symbols: PSBA | Encodes chlorophyll binding protein D1, a part of the photosystem II reaction center core | chrC:383-1444 REVERSEmoderately similar to ( 277) PSBA_TOBAC Photosystem Q(B) protein (32 kDa thylakoid membrane protein) (Photosystem II protein D1) - Nicotiana tabacum (Common tobacco)moderately similar to ( 273) loc_os10g21200 12010.m05138 protein…
CUST_42940_PI426222305	1.05532	2326.22	1.25176	2703.04	0.861808	2022.95	1.736	5838.42	2.58002	6197.65	1.03151	2782.47	0.49811	1168.43	0.57101	1283.73	PGSC0003DMT400015740	Chlorophyll a-b binding protein 4, chloroplastic	chr07	Chlorophyll a-b binding protein 4, chloroplastic	PGSC0003DMP400010908	PGSC0003DMG400006149	PGSC0003DMC400010908	PGSC0003DMT400015740	1.1.1.1	PS.lightreaction.photosystem II.LHC-II	pgsc0003dmp400010908	moderately similar to ( 474) AT3G27690 | Symbols: LHCB2.4, LHCB2.3, LHCB2 | LHCB2.3; chlorophyll binding | chr3:10256002-10256921 FORWARDhighly similar to ( 502) CB23_TOBAC Chlorophyll a-b binding protein 36, chloroplast precursor (LHCII type I CAB-36) (LHCP) - Nicotiana tabacum (Common tobacco)moderately similar to ( 469) loc_os03g39610 12003.m35304 protein chlorophyll a-b binding protein, chlor…	GO:0016021;GO:0009941;GO:0010287;GO:0009535;GO:0009523;GO:0009522	GO:0046872;GO:0016168	GO:0010114;GO:0010218;GO:0009637;GO:0009765;GO:0018298
CUST_41124_PI426222305	0.6777	651.66	1.33595	1180.54	0.795521	774.199	1.21998	1752.37	1.39461	1483.16	0.971922	1109.05	0.8998	916.191	1.06803	990.292	PGSC0003DMT400004386	Photosystem II D2 protein	chr09	Photosystem II D2 protein	PGSC0003DMP400003127	PGSC0003DMG400001746	PGSC0003DMC400003127	PGSC0003DMT400004386	1.1.1.2	PS.lightreaction.photosystem II.PSII polypeptide subunits	pgsc0003dmp400003127	moderately similar to ( 391) ATCG00270 | Symbols: PSBD | PSII D2 protein | chrC:32711-33772 FORWARDmoderately similar to ( 397) PSBD_TOBAC Photosystem II D2 protein (Photosystem Q(A) protein) (PSII D2 protein) - Nicotiana tabacum (Common tobacco)moderately similar to ( 390) loc_osp1g00170 11562.m00006 protein photosystem II protein D2psbD Photo_RC psbA PGSC0003DMT400004386	GO:0016021;GO:0009535;GO:0009523;GO:0009522	GO:0046872;GO:0016168	GO:0009765;GO:0018298
CUST_33095_PI426222305	0.652668	2352.51	1.30299	4398.51	0.818921	2954.74	1.17852	6299.45	1.35731	5389.56	0.911264	3883.01	0.887443	3350.88	1.12724	3882.52	PGSC0003DMT400016094	Photosystem II D2 protein	chr01	Photosystem II D2 protein	PGSC0003DMP400011155	PGSC0003DMG400006291	PGSC0003DMC400011155	PGSC0003DMT400016094	1.1.1.2	PS.lightreaction.photosystem II.PSII polypeptide subunits	pgsc0003dmp400011155	weakly similar to ( 123) ATCG00270 | Symbols: PSBD | PSII D2 protein | chrC:32711-33772 FORWARDweakly similar to ( 124) PSBD_CHLRE Photosystem II D2 protein (Photosystem Q(A) protein) (PSII D2 protein) - Chlamydomonas reinhardtiiweakly similar to ( 126) loc_os01g58040 12001.m11951 protein photosystem II D2 protein, putative, expressedpsbD PGSC0003DMT400016094
CUST_21144_PI426222305	0.650956	496.401	1.21313	844.988	0.823586	632.655	1.17171	1330.03	1.37687	1164.46	0.947021	858.753	0.893155	726.701	1.05546	773.583	PGSC0003DMT400020261	Photosystem II D2 protein	chr12	Photosystem II D2 protein	PGSC0003DMP400013804	PGSC0003DMG400007834	PGSC0003DMC400013804	PGSC0003DMT400020261	1.1.1.2	PS.lightreaction.photosystem II.PSII polypeptide subunits	pgsc0003dmp400013804	moderately similar to ( 226) ATCG00270 | Symbols: PSBD | PSII D2 protein | chrC:32711-33772 FORWARDmoderately similar to ( 229) PSBD_MARPO Photosystem II D2 protein (Photosystem Q(A) protein) (PSII D2 protein) - Marchantia polymorpha (Liverwort)moderately similar to ( 227) loc_osp1g00170 11562.m00006 protein photosystem II protein D2psbD Photo_RC psbA PGSC0003DMT400020261	GO:0016021;GO:0009535;GO:0009523;GO:0009522	GO:0046872;GO:0016168	GO:0009765;GO:0018298
CUST_4081_PI426222305	0.805392	1378.04	1.22597	1991.35	0.860662	1498.97	1.41493	3663.88	1.89241	3598.53	0.971211	2030.85	0.950532	1719.3	0.984856	1667.73	PGSC0003DMT400038938	Photosystem II CP47 chlorophyll apoprotein	chr01	Photosystem II CP47 chlorophyll apoprotein	PGSC0003DMP400026460	PGSC0003DMG400015062	PGSC0003DMC400026460	PGSC0003DMT400038938	1.1.1.2	PS.lightreaction.photosystem II.PSII polypeptide subunits	pgsc0003dmp400026460	weakly similar to ( 158) ATCG00680 | Symbols: PSBB | encodes for CP47, subunit of the photosystem II reaction center. | chrC:72371-73897 FORWARDweakly similar to ( 159) PSBB_TOBAC Photosystem II P680 chlorophyll A apoprotein (CP-47 protein) - Nicotiana tabacum (Common tobacco)weakly similar to ( 155) loc_os09g04680 12009.m03837 protein photosystem II P680 chlorophyll A apoprotein, putativepsbB PS…
CUST_13067_PI426222305	0.774122	1422.64	1.15815	1957.14	0.810192	1495.63	1.42704	3933.11	1.92857	3888.94	0.913307	2033.72	0.904543	1737.9	0.939584	1681.17	PGSC0003DMT400096732	Photosystem II CP47 chlorophyll apoprotein	chr12	Photosystem II CP47 chlorophyll apoprotein	PGSC0003DMP400068407	PGSC0003DMG400046303	PGSC0003DMC400068407	PGSC0003DMT400096732	1.1.1.2	PS.lightreaction.photosystem II.PSII polypeptide subunits	pgsc0003dmp400068407	highly similar to ( 977) ATCG00680 | Symbols: PSBB | encodes for CP47, subunit of the photosystem II reaction center. | chrC:72371-73897 FORWARDhighly similar to ( 985) PSBB_TOBAC Photosystem II P680 chlorophyll A apoprotein (CP-47 protein) - Nicotiana tabacum (Common tobacco)highly similar to ( 953) loc_osp1g00600 11562.m00051 protein photosystem II 47 kDa proteinpsbB PSII PGSC0003DMT400096732
CUST_15188_PI426222305	0.928303	5849.33	1.39031	8394.33	0.845979	5596.35	1.57867	15332.4	2.04421	14337.5	1.11346	8788	0.871559	5988.04	1.09447	6943.3	PGSC0003DMT400057257	Photosystem II 10 kDa polypeptide, chloroplastic	chr07	Photosystem II 10 kDa polypeptide, chloroplastic	PGSC0003DMP400038514	PGSC0003DMG400022241	PGSC0003DMC400038514	PGSC0003DMT400057257	1.1.1.2	PS.lightreaction.photosystem II.PSII polypeptide subunits	pgsc0003dmp400038514	weakly similar to ( 166) AT1G79040 | Symbols: PSBR | PSBR (photosystem II subunit R) | chr1:29736085-29736781 FORWARDmoderately similar to ( 206) PSBR_SOLTU Photosystem II 10 kDa polypeptide, chloroplast precursor (Light-inducible tissue-specific ST-LS1 protein) - Solanum tuberosum (Potato)weakly similar to ( 127) loc_os08g10020 12008.m26609 protein photosystem II 10 kDa polypeptide, chloroplast …
CUST_13093_PI426222305	0.843052	555.753	1.19004	729.986	0.903637	618.889	0.968551	980.654	1.256	919.59	0.876324	696.547	0.853949	609.452	0.985279	638.262	PGSC0003DMT400013592	Cytochrome b559 subunit alpha	chr12	Cytochrome b559 subunit alpha	PGSC0003DMP400009416	PGSC0003DMG400005310	PGSC0003DMC400009416	PGSC0003DMT400013592	1.1.1.2	PS.lightreaction.photosystem II.PSII polypeptide subunits	pgsc0003dmp400009416	weakly similar to ( 154) ATCG00580 | Symbols: PSBE | PSII cytochrome b559. There have been many speculations about the function of Cyt b559, but the most favored at present is that it plays a protective role by acting as an electron acceptor or electron donor under conditions when electron flow through PSII is not optimized. | chrC:64071-64322 REVERSEweakly similar to ( 154) PSBE_SOLTU Cytochrome…	GO:0016021;GO:0009535;GO:0009523;GO:0009522	GO:0046872;GO:0016168	GO:0009765;GO:0018298
CUST_13993_PI426222305	1.01072	379.957	1.15919	402.838	1.06325	417.527	0.665333	412.46	0.902613	383.176	0.935553	430.922	1.09925	457.052	1.24345	474.22	PGSC0003DMT400005077	Photosystem Q(B) protein	chr09	Protein ycf2	PGSC0003DMP400003599	PGSC0003DMG400002008	PGSC0003DMC400003599	PGSC0003DMT400005077	1.1.1.2	PS.lightreaction.photosystem II.PSII polypeptide subunits	pgsc0003dmp400003599	weakly similar to ( 119) ATCG00020 | Symbols: PSBA | Encodes chlorophyll binding protein D1, a part of the photosystem II reaction center core | chrC:383-1444 REVERSEweakly similar to ( 120) PSBA_VICFA Photosystem Q(B) protein (32 kDa thylakoid membrane protein) (Photosystem II protein D1) - Vicia faba (Broad bean)weakly similar to ( 119) loc_os10g21200 12010.m05138 protein photosystem Q, putativ…	GO:0016021;GO:0009535;GO:0009523;GO:0009522	GO:0046872;GO:0016168	GO:0009765;GO:0018298

## Sheet: BIN1 PSI TableS13
Code ()*	WL6		Blue6		Red6		WL24		Blue24		Red24		Dark (18oC)		Dark (21oC)
Systematic	Normalized	Raw	Normalized	Raw	Normalized	Raw	Normalized	Raw	Normalized	Raw	Normalized	Raw	Normalized	Raw	Normalized	Raw	PrimaryAccession	UniRef based putative functional annotation	Chromosome	putative function	peptide ID	gene ID	CDS ID	transcript ID	MpMan bin	MapMan name	MapMan pep	MapMan description	GO: CC	GO: MF	GO: BP
CUST_9834_PI426222305	1.02995	4.75119	1.14237	4.78524	1.01761	4.88603	3.47861	239.833	0.939815	5.0175	2.71211	56.2717	0.97179	5.10896	1.03328	4.67008	PGSC0003DMT400011381	Light-harvesting complex I protein Lhca5	chr07	Light-harvesting complex I protein Lhca5	PGSC0003DMP400007918	PGSC0003DMG400004458	PGSC0003DMC400007918	PGSC0003DMT400011381	1.1.2.1	PS.lightreaction.photosystem I.LHC-I	pgsc0003dmp400007918	weakly similar to ( 197) AT1G45474 | Symbols: LHCA5 | LHCA5; pigment binding | chr1:17179353-17180439 FORWARDvery weakly similar to (93.2) CB12_PETHY Chlorophyll a-b binding protein, chloroplast precursor (LHCI type II CAB) - Petunia hybrida (Petunia)weakly similar to ( 186) loc_os02g52650 12002.m10295 protein chlorophyll a-b binding protein 4, chloroplast precursor, putative, expressedChloroa_b-…	GO:0009535;GO:0030076;GO:0009782	GO:0046872;GO:0031409	GO:0010207;GO:0006364;GO:0010027;GO:0009768
CUST_13246_PI426222305	1.02422	5.39407	1.16458	5.60379	0.946551	5.14615	2.24891	76.0847	0.944671	5.51667	2.71516	30.9806	0.996852	5.67856	0.96297	4.82988	PGSC0003DMT400017174	Photosystem I reaction center subunit V, chloroplast		Photosystem I reaction center subunit V, chloroplast	PGSC0003DMP400011849	PGSC0003DMG400006702	PGSC0003DMC400011849	PGSC0003DMT400017174	1.1.2.2	PS.lightreaction.photosystem I.PSI polypeptide subunits	pgsc0003dmp400011849	very weakly similar to (90.9) AT1G55670 | Symbols: PSAG | PSAG (PHOTOSYSTEM I SUBUNIT G) | chr1:20802874-20803356 REVERSEvery weakly similar to (94.4) PSAG_SPIOL Photosystem I reaction center subunit V, chloroplast precursor (PSI-G) (Photosystem I 9 kDa protein) - Spinacia oleracea (Spinach)very weakly similar to (85.1) loc_os09g30340 12009.m06185 protein photosystem I reaction center subunit V, …
CUST_7724_PI426222305	0.995333	4.04365	1.69048	8.1826	1.10482	5.31355	2.58976	110.858	0.892311	4.27615	2.47031	49.5101	0.99393	4.95265	0.998555	4.01571	PGSC0003DMT400013227	APO protein 4, mitochondrial	chr04	APO protein 4, mitochondrial	PGSC0003DMP400009172	PGSC0003DMG400005164	PGSC0003DMC400009172	PGSC0003DMT400013227	1.1.2	PS.lightreaction.photosystem I	pgsc0003dmp400009172	moderately similar to ( 375) AT3G21740 | Symbols: APO4 | APO4 (ACCUMULATION OF PHOTOSYSTEM ONE 4) | chr3:7662542-7663638 REVERSEmoderately similar to ( 365) loc_os04g53612 12004.m35056 protein expressed proteinDUF794 PGSC0003DMT400013227
CUST_13188_PI426222305	1.01844	4.48378	1.76833	8.15097	0.974441	4.52651	2.73358	121.806	0.913029	4.65746	3.29747	52.926	0.960978	4.76998	1.02292	4.62374	PGSC0003DMT400007516	Chlorophyll A/B binding protein	chr12	Chlorophyll A/B binding protein	PGSC0003DMP400005228	PGSC0003DMG400002901	PGSC0003DMC400005228	PGSC0003DMT400007516	1.1.2.1	PS.lightreaction.photosystem I.LHC-I	pgsc0003dmp400005228	moderately similar to ( 270) AT1G19150 | Symbols: LHCA6, LHCA2*1 | LHCA6; chlorophyll binding | chr1:6612806-6613799 FORWARDmoderately similar to ( 213) CB12_PETHY Chlorophyll a-b binding protein, chloroplast precursor (LHCI type II CAB) - Petunia hybrida (Petunia)moderately similar to ( 241) loc_os09g26810 12009.m05833 protein chlorophyll a-b binding protein, chloroplast precursor, putative, exp…
CUST_31403_PI426222305	0.992001	5.09005	2.71169	15.9705	0.960782	5.23345	4.47652	243.262	1.41743	8.90727	3.50239	158.408	1.02624	5.89812	1.01581	5.17961	PGSC0003DMT400042546	PSI-H	chr06	PSI-H	PGSC0003DMP400028862	PGSC0003DMG400016504	PGSC0003DMC400028862	PGSC0003DMT400042546	1.1.2.2	PS.lightreaction.photosystem I.PSI polypeptide subunits	pgsc0003dmp400028862	weakly similar to ( 154) AT1G52230 | Symbols: PSAH2, PSAH-2, PSI-H | PSAH2 (PHOTOSYSTEM I SUBUNIT H2) | chr1:19454902-19455508 FORWARDweakly similar to ( 154) PSAH_BRARA Photosystem I reaction center subunit VI, chloroplast precursor (PSI-H) (Light-harvesting complex I 11 kDa protein) - Brassica rapa (Turnip)weakly similar to ( 137) loc_os05g48630 12005.m08934 protein expressed proteinPSI_PsaH PG…
CUST_7434_PI426222305	1.40859	7.95248	1.4978	7.61531	0.932811	5.06568	3.79092	128.932	0.97829	5.56417	1.92909	28.1829	0.97935	5.54119	0.982447	4.96847	PGSC0003DMT400013226	APO protein 4, mitochondrial	chr04	APO protein 4, mitochondrial	PGSC0003DMP400009171	PGSC0003DMG400005164	PGSC0003DMC400009171	PGSC0003DMT400013226	1.1.2	PS.lightreaction.photosystem I	pgsc0003dmp400009171	moderately similar to ( 233) AT3G21740 | Symbols: APO4 | APO4 (ACCUMULATION OF PHOTOSYSTEM ONE 4) | chr3:7662542-7663638 REVERSEmoderately similar to ( 224) loc_os04g53612 12004.m35056 protein expressed proteinDUF794 PGSC0003DMT400013226
CUST_9470_PI426222305	0.794786	181.986	0.999927	210.878	0.794853	183.736	5.13008	1718.44	6.29661	1554.27	1.65858	457.554	0.732653	172.331	1.08903	240.538	PGSC0003DMT400006768	Photosystem I psaH protein	chr03	Photosystem I psaH protein	PGSC0003DMP400004699	PGSC0003DMG400002626	PGSC0003DMC400004699	PGSC0003DMT400006768	1.1.2.2	PS.lightreaction.photosystem I.PSI polypeptide subunits	pgsc0003dmp400004699	weakly similar to ( 155) AT1G52230 | Symbols: PSAH2, PSAH-2, PSI-H | PSAH2 (PHOTOSYSTEM I SUBUNIT H2) | chr1:19454902-19455508 FORWARDweakly similar to ( 159) PSAH_SPIOL Photosystem I reaction center subunit VI, chloroplast precursor (PSI-H) (Light-harvesting complex I 11 kDa protein) - Spinacia oleracea (Spinach)weakly similar to ( 137) loc_os05g48630 12005.m08934 protein expressed proteinPSI_Ps…	GO:0016021;GO:0010287;GO:0009535;GO:0009538		GO:0015979
CUST_32396_PI426222305	0.682709	305.063	0.985898	417.991	0.579247	272.361	5.43046	3524.56	6.81756	3220.98	1.47155	754.562	0.637021	291.304	1.03364	441.024	PGSC0003DMT400030843	Photosystem I reaction centre PSI-D subunit	chr06	Photosystem I reaction centre PSI-D subunit	PGSC0003DMP400020951	PGSC0003DMG400011816	PGSC0003DMC400020951	PGSC0003DMT400030843	1.1.2.2	PS.lightreaction.photosystem I.PSI polypeptide subunits	pgsc0003dmp400020951	moderately similar to ( 266) AT1G03130 | Symbols: PSAD-2 | PSAD-2 (photosystem I subunit D-2) | chr1:753528-754142 REVERSEmoderately similar to ( 315) PSAD_NICSY Photosystem I reaction center subunit II, chloroplast precursor (Photosystem I 20 kDa subunit) (PSI-D) - Nicotiana sylvestris (Wood tobacco)moderately similar to ( 267) loc_os08g44680 12008.m08440 protein photosystem I reaction center su…	GO:0009941;GO:0010287;GO:0009535;GO:0009538		GO:0015979
CUST_40022_PI426222305	0.421788	76.7482	1.02493	181.489	0.26867	46.0146	11.2274	2599.85	15.8586	2706.96	2.67501	487.824	0.330917	55.2369	1.10987	178.323	PGSC0003DMT400015075	16kDa membrane protein	chr06	16kDa membrane protein	PGSC0003DMP400010435	PGSC0003DMG400005890	PGSC0003DMC400010435	PGSC0003DMT400015075	1.1.2.2	PS.lightreaction.photosystem I.PSI polypeptide subunits	pgsc0003dmp400010435	moderately similar to ( 204) AT1G08380 | Symbols: PSAO | PSAO (photosystem I subunit O) | chr1:2641004-2641739 REVERSEweakly similar to ( 166) loc_os04g33830 12004.m08478 protein 16kDa membrane protein, putative, expressed PGSC0003DMT400015075
CUST_25917_PI426222305	0.672976	99.4422	1.00705	148.395	0.545988	84.6178	3.86351	882.17	4.34418	717.46	1.69217	314.567	0.504623	79.5469	1.0782	159.025	PGSC0003DMT400051932	Photosystem I reaction center subunit IV A isoform 2	chr06	Photosystem I reaction center subunit IV A isoform 2	PGSC0003DMP400034978	PGSC0003DMG400020154	PGSC0003DMC400034978	PGSC0003DMT400051932	1.1.2.2	PS.lightreaction.photosystem I.PSI polypeptide subunits	pgsc0003dmp400034978	weakly similar to ( 112) AT2G20260 | Symbols: PSAE-2 | PSAE-2 (photosystem I subunit E-2); catalytic | chr2:8736780-8737644 FORWARDweakly similar to ( 115) PSAEA_NICSY Photosystem I reaction center subunit IV A, chloroplast precursor (PSI-E A) [Contains: Photosystem I reaction center subunit IV A isoform 2] - Nicotiana sylvestris (Wood tobacco)weakly similar to ( 105) loc_os07g25430 12007.m29150 …
CUST_25620_PI426222305	0.88841	28.9308	1.46316	49.4073	0.66113	23.014	11.7433	595.861	16.6615	612.887	3.07577	127.499	0.640074	23.0578	0.810809	27.7257	PGSC0003DMT400029398	Thylakoid membrane phosphoprotein 14 kDa, chloroplastic	chr10	Thylakoid membrane phosphoprotein 14 kDa, chloroplastic	PGSC0003DMP400020012	PGSC0003DMG400011295	PGSC0003DMC400020012	PGSC0003DMT400029398	1.1.2.2	PS.lightreaction.photosystem I.PSI polypeptide subunits	pgsc0003dmp400020012	weakly similar to ( 149) AT2G46820 | Symbols: PTAC8, TMP14, PSAP, PSI-P | PSI-P (PHOTOSYSTEM I P SUBUNIT); DNA binding | chr2:19243729-19244870 FORWARDweakly similar to ( 127) loc_os10g39150 12010.m06686 protein thylakoid membrane phosphoprotein 14 kda, chloroplast precursor, putative, expressed PGSC0003DMT400029398
CUST_15010_PI426222305	0.793775	303.691	1.14057	424.83	0.606177	249.088	5.46893	3125.53	7.24594	2998.19	1.86601	852.184	0.609673	242.909	1.02077	381.081	PGSC0003DMT400057281	Chloroplast photosystem I reaction center V	chr07	Chloroplast photosystem I reaction center V	PGSC0003DMP400038531	PGSC0003DMG400022249	PGSC0003DMC400038531	PGSC0003DMT400057281	1.1.2.2	PS.lightreaction.photosystem I.PSI polypeptide subunits	pgsc0003dmp400038531	weakly similar to ( 184) AT1G55670 | Symbols: PSAG | PSAG (PHOTOSYSTEM I SUBUNIT G) | chr1:20802874-20803356 REVERSEweakly similar to ( 187) PSAG_SPIOL Photosystem I reaction center subunit V, chloroplast precursor (PSI-G) (Photosystem I 9 kDa protein) - Spinacia oleracea (Spinach)weakly similar to ( 168) loc_os09g30340 12009.m06185 protein photosystem I reaction center subunit V, chloroplast pre…
CUST_24489_PI426222305	0.725152	123.239	1.17427	197.93	0.437799	77.9245	4.94231	1232.4	5.28426	1016.08	1.44469	289.15	0.517934	92.9555	0.815321	142.227	PGSC0003DMT400054482	Photosystem I subunit III	chr07	Photosystem I subunit III	PGSC0003DMP400036657	PGSC0003DMG400021144	PGSC0003DMC400036657	PGSC0003DMT400054482	1.1.2.2	PS.lightreaction.photosystem I.PSI polypeptide subunits	pgsc0003dmp400036657	moderately similar to ( 294) AT1G31330 | Symbols: PSAF | PSAF (photosystem I subunit F) | chr1:11215011-11215939 REVERSEmoderately similar to ( 288) PSAF_SPIOL Photosystem I reaction center subunit III, chloroplast precursor (Light-harvesting complex I 17 kDa protein) (PSI-F) - Spinacia oleracea (Spinach)moderately similar to ( 265) loc_os03g56670 12003.m34938 protein photosystem I reaction cente…
CUST_25211_PI426222305	0.613049	27.0506	1.4938	59.4918	0.334963	16.3182	10.8015	657.531	13.4583	632.055	3.2896	158.89	0.309991	14.7529	0.656398	28.2028	PGSC0003DMT400014861	Photosystem I reaction center subunit	chr08	Photosystem I reaction center subunit	PGSC0003DMP400010291	PGSC0003DMG400005805	PGSC0003DMC400010291	PGSC0003DMT400014861	1.1.2.2	PS.lightreaction.photosystem I.PSI polypeptide subunits	pgsc0003dmp400010291	weakly similar to ( 188) AT5G64040 | Symbols: PSAN | PSAN; calmodulin binding | chr5:25628690-25629409 REVERSEweakly similar to ( 155) PSAN_MAIZE Photosystem I reaction center subunit N, chloroplast precursor (PSI-N) (Fragment) - Zea mays (Maize)weakly similar to ( 164) loc_os12g08770 12012.m04863 protein photosystem I reaction center subunit N, chloroplast precursor, putative, expressedPsaN PGSC…
CUST_24652_PI426222305	0.711238	13.4587	0.825027	14.2742	0.310513	5.20828	9.88003	245.129	12.2717	220.465	2.18258	44.7743	0.563993	10.5563	0.357717	5.79191	PGSC0003DMT400054480	Photosystem I subunit III	chr02	Photosystem I subunit III	PGSC0003DMP400036655	PGSC0003DMG400021144	PGSC0003DMC400036655	PGSC0003DMT400054480	1.1.2.2	PS.lightreaction.photosystem I.PSI polypeptide subunits	pgsc0003dmp400036655	moderately similar to ( 295) AT1G31330 | Symbols: PSAF | PSAF (photosystem I subunit F) | chr1:11215011-11215939 REVERSEmoderately similar to ( 289) PSAF_SPIOL Photosystem I reaction center subunit III, chloroplast precursor (Light-harvesting complex I 17 kDa protein) (PSI-F) - Spinacia oleracea (Spinach)moderately similar to ( 265) loc_os03g56670 12003.m34938 protein photosystem I reaction cente…	GO:0016021;GO:0009535;GO:0009522	GO:0046872;GO:0016491;GO:0051539;GO:0016168	GO:0022900;GO:0015979;GO:0018298
CUST_49955_PI426222305	0.454009	98.2166	1.28696	237.01	0.452622	87.3132	7.9746	2278.54	7.37365	1658.03	1.9873	456.776	0.489712	103.14	0.911228	174.864	PGSC0003DMT400071155	Photosystem I subunit XI	chr06	Photosystem I subunit XI	PGSC0003DMP400048121	PGSC0003DMG400027672	PGSC0003DMC400048121	PGSC0003DMT400071155	1.1.2.2	PS.lightreaction.photosystem I.PSI polypeptide subunits	pgsc0003dmp400048121	moderately similar to ( 290) AT4G12800 | Symbols: PSAL | PSAL (photosystem I subunit L) | chr4:7521469-7522493 FORWARDmoderately similar to ( 282) PSAL_SPIOL Photosystem I reaction center subunit XI, chloroplast precursor (PSI-L) (PSI subunit V) - Spinacia oleracea (Spinach)moderately similar to ( 250) loc_os12g23200 12012.m26900 protein photosystem I reaction center subunit XI, chloroplast precu…
CUST_25523_PI426222305	0.390225	14.8042	1.15337	39.7165	0.226551	6.41086	8.50425	363.338	6.25294	218.694	2.12174	83.2764	0.373997	11.786	0.908384	24.6452	PGSC0003DMT400037285	Chlorophyll a-b binding protein 7, chloroplastic	chr10	Chlorophyll a-b binding protein 7, chloroplastic	PGSC0003DMP400025334	PGSC0003DMG400014386	PGSC0003DMC400025334	PGSC0003DMT400037285	1.1.2.1	PS.lightreaction.photosystem I.LHC-I	pgsc0003dmp400025334	moderately similar to ( 298) AT3G61470 | Symbols: LHCA2 | LHCA2; chlorophyll binding | chr3:22745736-22747032 FORWARDmoderately similar to ( 308) CB12_PETHY Chlorophyll a-b binding protein, chloroplast precursor (LHCI type II CAB) - Petunia hybrida (Petunia)moderately similar to ( 294) loc_os07g38960 12007.m29236 protein chlorophyll a-b binding protein, chloroplast precursor, putative, expressedC…
CUST_24567_PI426222305	0.663114	209.855	1.25715	377.197	0.491887	165.137	4.73991	2080.55	5.52309	1852.6	1.11976	397.757	0.748984	232.447	1.07798	322.933	PGSC0003DMT400054481	Photosystem I subunit III	chr02	Photosystem I subunit III	PGSC0003DMP400036656	PGSC0003DMG400021144	PGSC0003DMC400036656	PGSC0003DMT400054481	1.1.2.2	PS.lightreaction.photosystem I.PSI polypeptide subunits	pgsc0003dmp400036656	moderately similar to ( 295) AT1G31330 | Symbols: PSAF | PSAF (photosystem I subunit F) | chr1:11215011-11215939 REVERSEmoderately similar to ( 289) PSAF_SPIOL Photosystem I reaction center subunit III, chloroplast precursor (Light-harvesting complex I 17 kDa protein) (PSI-F) - Spinacia oleracea (Spinach)moderately similar to ( 265) loc_os03g56670 12003.m34938 protein photosystem I reaction cente…
CUST_20983_PI426222305	0.714429	146.198	1.08624	236.181	0.533179	114.582	3.16466	931.289	4.5794	971.725	1.32126	309.09	0.73198	152.949	1.11586	215.344	PGSC0003DMT400056635	Photosystem I reaction center subunit IV B isoform 2	chr04	Photosystem I reaction center subunit IV B isoform 2	PGSC0003DMP400038088	PGSC0003DMG400022022	PGSC0003DMC400038088	PGSC0003DMT400056635	1.1.2.2	PS.lightreaction.photosystem I.PSI polypeptide subunits	pgsc0003dmp400038088	weakly similar to ( 103) AT2G20260 | Symbols: PSAE-2 | PSAE-2 (photosystem I subunit E-2); catalytic | chr2:8736780-8737644 FORWARDweakly similar to ( 126) PSAEB_NICSY Photosystem I reaction center subunit IV B, chloroplast precursor (PSI-E B) [Contains: Photosystem I reaction center subunit IV B isoform 2] - Nicotiana sylvestris (Wood tobacco)very weakly similar to (97.4) loc_os07g25430 12007.m2…
CUST_47780_PI426222305	0.879791	325.681	1.08101	369.34	0.925012	357.019	2.45752	1407.93	3.55803	1468.1	1.85414	832.11	0.788611	314.022	0.595639	217.519	PGSC0003DMT400031388	Photosystem I P700 chlorophyll a apoprotein	chr08	Photosystem I P700 chlorophyll a apoprotein	PGSC0003DMP400021283	PGSC0003DMG400012033	PGSC0003DMC400021283	PGSC0003DMT400031388	1.1.2.2	PS.lightreaction.photosystem I.PSI polypeptide subunits	pgsc0003dmp400021283	weakly similar to ( 151) ATCG00350 | Symbols: PSAA | Encodes psaA protein comprising the reaction center for photosystem I along with psaB protein; hydrophobic protein encoded by the chloroplast genome. | chrC:39605-41857 REVERSEweakly similar to ( 152) PSAA_SPIOL Photosystem I P700 chlorophyll a apoprotein A1 (PsaA) (PSI-A) - Spinacia oleracea (Spinach)weakly similar to ( 153) loc_os01g57974 120…	GO:0016021;GO:0009941;GO:0010287;GO:0009535;GO:0009538		GO:0015979
CUST_36554_PI426222305	1.05266	24.9264	1.2957	28.1302	0.530079	13.5355	6.09192	257.129	4.89563	124.35	2.67046	103.791	0.468471	14.0175	0.437697	11.2505	PGSC0003DMT400064515	One-helix protein	chr04	One-helix protein	PGSC0003DMP400043495	PGSC0003DMG400025068	PGSC0003DMC400043495	PGSC0003DMT400064515	1.1.2.1	PS.lightreaction.photosystem I.LHC-I	pgsc0003dmp400043495	weakly similar to ( 168) AT1G34000 | Symbols: OHP2 | OHP2 (ONE-HELIX PROTEIN 2) | chr1:12358151-12358902 REVERSEweakly similar to ( 144) loc_os01g40710 12001.m10341 protein OHP2, putative, expressed PGSC0003DMT400064515
CUST_40335_PI426222305	1.09291	5.12634	1.03919	4.1727	0.919088	4.04442	17.9279	169.419	7.6328	47.6587	2.53021	27.2257	0.885675	4.43997	0.9637	3.93102	PGSC0003DMT400048376	One-helix protein	chr12	One-helix protein	PGSC0003DMP400032758	PGSC0003DMG400018793	PGSC0003DMC400032758	PGSC0003DMT400048376	1.1.2.1	PS.lightreaction.photosystem I.LHC-I	pgsc0003dmp400032758	weakly similar to ( 158) AT1G34000 | Symbols: OHP2 | OHP2 (ONE-HELIX PROTEIN 2) | chr1:12358151-12358902 REVERSEweakly similar to ( 143) loc_os01g40710 12001.m10341 protein OHP2, putative, expressed PGSC0003DMT400048376
CUST_40327_PI426222305	1.02687	5.199	1.06444	4.8891	0.920724	4.77837	18.6768	170.669	8.85658	52.5216	2.09912	18.5904	0.900519	5.06695	0.957881	4.63293	PGSC0003DMT400048375	One-helix protein	chr03	One-helix protein	PGSC0003DMP400032757	PGSC0003DMG400018793	PGSC0003DMC400032757	PGSC0003DMT400048375	1.1.2.1	PS.lightreaction.photosystem I.LHC-I	pgsc0003dmp400032757	very weakly similar to (87.0) AT1G34000 | Symbols: OHP2 | OHP2 (ONE-HELIX PROTEIN 2) | chr1:12358151-12358902 REVERSE PGSC0003DMT400048375			GO:0015979
CUST_37251_PI426222305	0.9678	4.06231	1.04699	4.3309	0.925987	4.25514	8.26943	74.0889	2.69818	26.1164	2.86883	23.9039	0.892322	4.53704	0.970934	4.13549	PGSC0003DMT400019583	PSI-H	chr12	PSI-H	PGSC0003DMP400013391	PGSC0003DMG400007571	PGSC0003DMC400013391	PGSC0003DMT400019583	1.1.2.2	PS.lightreaction.photosystem I.PSI polypeptide subunits	pgsc0003dmp400013391	weakly similar to ( 149) AT1G52230 | Symbols: PSAH2, PSAH-2, PSI-H | PSAH2 (PHOTOSYSTEM I SUBUNIT H2) | chr1:19454902-19455508 FORWARDweakly similar to ( 153) PSAH_SPIOL Photosystem I reaction center subunit VI, chloroplast precursor (PSI-H) (Light-harvesting complex I 11 kDa protein) - Spinacia oleracea (Spinach)weakly similar to ( 133) loc_os05g48630 12005.m08934 protein expressed proteinPSI_Ps…
CUST_6001_PI426222305	0.860648	393.451	1.29069	554.823	0.917819	437.322	1.01935	751.628	1.1724	613.12	0.967632	539.8	0.781167	397.407	1.0613	493.853	PGSC0003DMT400041230	Photosystem I P700 chlorophyll a apoprotein A1	chr07	Photosystem I P700 chlorophyll a apoprotein A1	PGSC0003DMP400027951	PGSC0003DMG400015960	PGSC0003DMC400027951	PGSC0003DMT400041230	1.1.2.2	PS.lightreaction.photosystem I.PSI polypeptide subunits	pgsc0003dmp400027951	moderately similar to ( 312) ATCG00350 | Symbols: PSAA | Encodes psaA protein comprising the reaction center for photosystem I along with psaB protein; hydrophobic protein encoded by the chloroplast genome. | chrC:39605-41857 REVERSEmoderately similar to ( 318) PSAA_AMBTC Photosystem I P700 chlorophyll a apoprotein A1 (PsaA) (PSI-A) - Amborella trichopodamoderately similar to ( 310) loc_osp1g0034…
CUST_49958_PI426222305	0.836032	21.9072	1.256	34.4321	1.05512	38.2501	0.878868	33.747	1.24345	35.3721	0.954398	40.7493	0.532245	14.3343	1.12924	45.5282	PGSC0003DMT400071154	Photosystem I subunit XI	chr06	Photosystem I subunit XI	PGSC0003DMP400048120	PGSC0003DMG400027671	PGSC0003DMC400048120	PGSC0003DMT400071154	1.1.2.2	PS.lightreaction.photosystem I.PSI polypeptide subunits	pgsc0003dmp400048120	moderately similar to ( 290) AT4G12800 | Symbols: PSAL | PSAL (photosystem I subunit L) | chr4:7521469-7522493 FORWARDmoderately similar to ( 279) PSAL_SPIOL Photosystem I reaction center subunit XI, chloroplast precursor (PSI-L) (PSI subunit V) - Spinacia oleracea (Spinach)moderately similar to ( 252) loc_os12g23200 12012.m26900 protein photosystem I reaction center subunit XI, chloroplast precu…
CUST_5993_PI426222305	0.909809	184.204	1.36096	267.395	0.86022	183.318	0.860531	270.898	1.2149	282.62	0.800758	204.864	0.834822	185.314	1.08567	226.125	PGSC0003DMT400013730	Photosystem I P700 chlorophyll a apoprotein A1	chr07	Photosystem I P700 chlorophyll a apoprotein A1	PGSC0003DMP400009508	PGSC0003DMG400005372	PGSC0003DMC400009508	PGSC0003DMT400013730	1.1.2.2	PS.lightreaction.photosystem I.PSI polypeptide subunits	pgsc0003dmp400009508	moderately similar to ( 370) ATCG00350 | Symbols: PSAA | Encodes psaA protein comprising the reaction center for photosystem I along with psaB protein; hydrophobic protein encoded by the chloroplast genome. | chrC:39605-41857 REVERSEmoderately similar to ( 379) PSAA_ATRBE Photosystem I P700 chlorophyll a apoprotein A1 (PsaA) (PSI-A) - Atropa belladonna (Belladonna) (Deadly nightshade)moderately s…	GO:0009538

## Sheet: BIN1 cytob6f&F-ATPase TableS14
cytob6f
Code ()*	WL6		Blue6		Red6		WL24		Blue24		Red24		Dark (18oC)		Dark (21oC)
Systematic	Normalized	Raw	Normalized	Raw	Normalized	Raw	Normalized	Raw	Normalized	Raw	Normalized	Raw	Normalized	Raw	Normalized	Raw	PrimaryAccession	UniRef based putative functional annotation	Chromosome	putative function	peptide ID	gene ID	CDS ID	transcript ID	MpMan bin	MapMan name	MapMan pep	MapMan description	GO: CC	GO: MF	GO: BP
CUST_36572_PI426222305	1.07651	3508.67	1.20288	3591.38	0.966215	3284.38	0.849359	4226.73	1.10441	4018.02	0.824108	3267.51	0.794302	2821.77	1.13368	3687.9	PGSC0003DMT400028503	Apocytochrome f		Apocytochrome f	PGSC0003DMP400019394	PGSC0003DMG400010974	PGSC0003DMC400019394	PGSC0003DMT400028503	1.1.3.4	PS.lightreaction.cytochrome b6/f.apocytochrome f (CYF)	pgsc0003dmp400019394	weakly similar to ( 196) ATCG00540 | Symbols: PETA | Encodes cytochrome f apoprotein; involved in photosynthetic electron transport chain; encoded by the chloroplast genome and is transcriptionally repressed by a nuclear gene HCF2. | chrC:61657-62619 FORWARDmoderately similar to ( 214) CYF_ATRBE Apocytochrome f precursor - Atropa belladonna (Belladonna) (Deadly nightshade)moderately similar to ( …
CUST_13081_PI426222305	1.02957	3185.53	1.14678	3292.2	0.951587	3096.09	0.815494	3888.28	1.11623	3895.59	0.845696	3206.26	0.806109	2729.5	1.11927	3501.57	PGSC0003DMT400007521	Apocytochrome f	chr01	Apocytochrome f	PGSC0003DMP400005233	PGSC0003DMG400002905	PGSC0003DMC400005233	PGSC0003DMT400007521	1.1.3.4	PS.lightreaction.cytochrome b6/f.apocytochrome f (CYF)	pgsc0003dmp400005233	moderately similar to ( 289) ATCG00540 | Symbols: PETA | Encodes cytochrome f apoprotein; involved in photosynthetic electron transport chain; encoded by the chloroplast genome and is transcriptionally repressed by a nuclear gene HCF2. | chrC:61657-62619 FORWARDmoderately similar to ( 311) CYF_TOBAC Apocytochrome f precursor - Nicotiana tabacum (Common tobacco)moderately similar to ( 297) loc_osp…
CUST_35050_PI426222305	0.904482	82.0791	1.0585	88.5587	0.968436	91.0741	1.62978	279.985	1.32108	133.08	1.38357	177.438	0.724143	71.591	0.585396	52.9501	PGSC0003DMT400049986	Cytochrome b6	chr10	Cytochrome b6	PGSC0003DMP400033743	PGSC0003DMG400019419	PGSC0003DMC400033743	PGSC0003DMT400049986	1.1.3.3	PS.lightreaction.cytochrome b6/f.cytochrome b6 (CYB6)	pgsc0003dmp400033743	weakly similar to ( 104) ATCG00720 | Symbols: PETB | Encodes the cytochrome b(6) subunit of the cytochrome b6f complex. | chrC:74841-76292 FORWARDweakly similar to ( 106) CYB6_OENHO Cytochrome b6 - Oenothera hookeri (Hooker's evening primrose)weakly similar to ( 106) loc_osp1g00640 11562.m00055 protein cytochrome b6petB PRK03735 Cytochrome_b_N PGSC0003DMT400049986
CUST_24440_PI426222305	0.874112	190.516	1.60817	331.146	0.751546	169.239	4.52184	1501.65	5.08548	1226.63	1.59681	438.008	0.382981	92.2233	0.688819	151.559	PGSC0003DMT400035747	Cytochrome b6-f complex iron-sulfur subunit, chloroplastic	chr12	Cytochrome b6-f complex iron-sulfur subunit, chloroplastic	PGSC0003DMP400024308	PGSC0003DMG400013751	PGSC0003DMC400024308	PGSC0003DMT400035747	1.1.3.1	PS.lightreaction.cytochrome b6/f.iron sulfur subunit	pgsc0003dmp400024308	moderately similar to ( 282) AT4G03280 | Symbols: PETC, PGR1 | PETC (PHOTOSYNTHETIC ELECTRON TRANSFER C); electron transporter, transferring electrons from cytochrome b6/f complex of photosystem II | chr4:1440462-1441717 FORWARDmoderately similar to ( 375) UCRIA_SOLTU Cytochrome b6-f complex iron-sulfur subunit, chloroplast precursor (EC 1.10.99.1) (Rieske iron-sulfur protein) (Plastohydroquinone…
CUST_21623_PI426222305	0.847514	10.0557	1.66623	19.2637	0.557112	7.3441	7.48728	363.422	2.23154	29.2239	2.54986	129.677	0.749889	10.0437	0.756878	9.05024	PGSC0003DMT400051088	Conserved gene of unknown function	chr02	Conserved gene of unknown function	PGSC0003DMP400034455	PGSC0003DMG400019837	PGSC0003DMC400034455	PGSC0003DMT400051088	1.1.3	PS.lightreaction.cytochrome b6/f	pgsc0003dmp400034455	weakly similar to ( 149) AT5G36120 | Symbols: CCB3 | CCB3 (COFACTOR ASSEMBLY, COMPLEX C (B6F),) | chr5:14198679-14199203 REVERSEweakly similar to ( 136) loc_os01g73540 12001.m13381 protein YGGT family protein, expressed PGSC0003DMT400051088	GO:0009535		GO:0006098;GO:0010027;GO:0019252;GO:0043085;GO:0000023;GO:0045893;GO:0009965;GO:0030154;GO:0010190
CUST_21640_PI426222305	1.03299	4.28527	2.6545	13.8238	0.988359	4.22596	4.01573	306.26	0.926071	4.47928	3.68066	141.3	0.952427	4.62912	1.03733	4.57007	PGSC0003DMT400051086	Conserved gene of unknown function	chr02	Conserved gene of unknown function	PGSC0003DMP400034454	PGSC0003DMG400019837	PGSC0003DMC400034454	PGSC0003DMT400051086	1.1.3	PS.lightreaction.cytochrome b6/f	pgsc0003dmp400034454	weakly similar to ( 144) AT5G36120 | Symbols: CCB3 | CCB3 (COFACTOR ASSEMBLY, COMPLEX C (B6F),) | chr5:14198679-14199203 REVERSEweakly similar to ( 134) loc_os01g73540 12001.m13381 protein YGGT family protein, expressed PGSC0003DMT400051086	GO:0016020
CUST_14710_PI426222305	1.02367	4.48812	1.38147	6.21704	1.00077	4.83256	2.63646	107.89	1.14919	6.40171	2.98656	75.8609	0.974878	5.16466	1.19383	5.71445	PGSC0003DMT400066469	Conserved gene of unknown function	chr01	Conserved gene of unknown function	PGSC0003DMP400044805	PGSC0003DMG402025831	PGSC0003DMC400044805	PGSC0003DMT400066469	1.1.3	PS.lightreaction.cytochrome b6/f	pgsc0003dmp400044805	very weakly similar to (89.0) AT2G26500 | Symbols: | cytochrome b6f complex subunit (petM), putative | chr2:11270370-11270747 FORWARD PGSC0003DMT400066469
F-ATPase
Code ()*	WL6		Blue6		Red6		WL24		Blue24		Red24		Dark (18oC)		Dark (21oC)
Systematic	Normalized	Raw	Normalized	Raw	Normalized	Raw	Normalized	Raw	Normalized	Raw	Normalized	Raw	Normalized	Raw	Normalized	Raw	PrimaryAccession	UniRef based putative functional annotation	Chromosome	putative function	peptide ID	gene ID	CDS ID	transcript ID	MpMan bin	MapMan name	MapMan pep	MapMan description	GO: CC	GO: MF	GO: BP
CUST_48203_PI426222305	1.03586	4.12043	1.12062	4.29772	0.991108	4.21602	1.64946	27.4361	0.928646	4.26574	1.84772	20.1528	0.955076	4.53815	1.18356	5.06615	PGSC0003DMT400071659	ATP synthase gamma chain	chr12	ATP synthase gamma chain	PGSC0003DMP400048475	PGSC0003DMG400027875	PGSC0003DMC400048475	PGSC0003DMT400071659	1.1.4.4	PS.lightreaction.ATP synthase.gamma chain	pgsc0003dmp400048475	moderately similar to ( 450) AT4G04640 | Symbols: ATPC1 | ATPC1; enzyme regulator | chr4:2350761-2351882 REVERSEmoderately similar to ( 471) ATPG_TOBAC ATP synthase gamma chain, chloroplast precursor (EC 3.6.3.14) - Nicotiana tabacum (Common tobacco)moderately similar to ( 434) loc_os07g32880 12007.m07550 protein ATP synthase gamma chain, chloroplast precursor, putative, expressedATP-synt PRK0562…	GO:0009535;GO:0045261	GO:0046961;GO:0046933	GO:0015986
CUST_17646_PI426222305	1.05999	82.7621	0.977756	71.7595	0.871118	72.3203	1.27346	308.324	0.943056	83.075	1.99483	197.899	0.901752	76.8399	1.01069	79.1566	PGSC0003DMT400035968	ATP synthase subunit alpha, mitochondrial	chr07	ATP synthase subunit alpha, mitochondrial	PGSC0003DMP400024440	PGSC0003DMG400013849	PGSC0003DMC400024440	PGSC0003DMT400035968	1.1.4	PS.lightreaction.ATP synthase	pgsc0003dmp400024440	weakly similar to ( 171) AT2G07698 | Symbols: | ATP synthase alpha chain, mitochondrial, putative | chr2:3361474-3364028 FORWARDweakly similar to ( 170) ATPAM_ORYSA ATP synthase subunit alpha, mitochondrial (EC 3.6.3.14) - Oryza sativa (Rice)weakly similar to ( 170) loc_osm1g00580 11706.m00050 protein ATP synthase F0 subunit 1PRK09281 F1_ATPase_alpha AtpA atpA ATP-synt_ab PRK07165 PGSC0003DMT4000…	GO:0005739;GO:0045261	GO:0005524;GO:0046961;GO:0046933	GO:0015986;GO:0015991
CUST_21309_PI426222305	0.681557	6.61531	1.93246	19.8679	1.09114	11.2044	6.21241	363.947	1.41074	17.4796	3.61178	156.393	0.469765	4.56415	0.769545	7.77078	PGSC0003DMT400020320	Conserved gene of unknown function	chr12	Conserved gene of unknown function	PGSC0003DMP400013845	PGSC0003DMG400007857	PGSC0003DMC400013845	PGSC0003DMT400020320	1.1.4	PS.lightreaction.ATP synthase	pgsc0003dmp400013845	moderately similar to ( 414) AT2G31040 | Symbols: | ATP synthase protein I -related | chr2:13209094-13211012 REVERSEmoderately similar to ( 362) loc_os01g48300 12001.m43139 protein expressed protein PGSC0003DMT400020320	GO:0005886		GO:0008150
CUST_38348_PI426222305	1.05949	503.754	1.28907	571.829	0.916539	458.504	3.93558	2870.19	4.48021	2383.27	1.29975	762.547	0.547526	284.735	0.715037	339.12	PGSC0003DMT400043672	ATP synthase delta chain, chloroplastic	chr07	ATP synthase delta chain, chloroplastic	PGSC0003DMP400029632	PGSC0003DMG400016959	PGSC0003DMC400029632	PGSC0003DMT400043672	1.1.4.7	PS.lightreaction.ATP synthase.delta chain	pgsc0003dmp400029632	moderately similar to ( 224) AT4G09650 | Symbols: ATPD | ATPD (ATP SYNTHASE DELTA-SUBUNIT GENE); hydrogen ion transporting ATP synthase, rotational mechanism / proton-transporting ATPase, rotational mechanism | chr4:6100799-6101503 FORWARDmoderately similar to ( 340) ATPD_TOBAC ATP synthase delta chain, chloroplast precursor (EC 3.6.3.14) - Nicotiana tabacum (Common tobacco)weakly similar to ( 18…	GO:0009941;GO:0010287;GO:0009535;GO:0010319;GO:0045261	GO:0046933	GO:0009409;GO:0006098;GO:0000165;GO:0010200;GO:0050832;GO:0031348;GO:0009867;GO:0009862;GO:0010363;GO:0006612;GO:0010207;GO:0019288;GO:0015995;GO:0006364;GO:0010027;GO:0009697;GO:0009772;GO:0009595;GO:0042742;GO:0010310;GO:0009773;GO:0043900;GO:0019252;GO:0015986;GO:0019760
CUST_27041_PI426222305	1.06099	516.089	1.42823	644.615	0.904933	458.465	2.92384	2189.19	3.1612	1691.75	1.53788	919.14	0.69218	367.244	0.723456	349.229	PGSC0003DMT400052777	ATP synthase subunit b', chloroplastic	chr06	ATP synthase subunit b', chloroplastic	PGSC0003DMP400035579	PGSC0003DMG400020484	PGSC0003DMC400035579	PGSC0003DMT400052777	1.1.4	PS.lightreaction.ATP synthase	pgsc0003dmp400035579	weakly similar to ( 145) AT4G32260 | Symbols: | ATP synthase family | chr4:15573859-15574586 REVERSEweakly similar to ( 160) ATPX_SPIOL ATP synthase B' chain, chloroplast precursor (EC 3.6.3.14) (Subunit II) - Spinacia oleracea (Spinach)weakly similar to ( 139) loc_os03g17070 12003.m07139 protein ATP synthase B chain, chloroplast precursor, putative, expressedatpG PRK07353 ATP-synt_B PGSC0003DMT4…
CUST_18583_PI426222305	0.624095	79.5795	1.35304	138.814	0.532072	59.4486	9.18259	1491.47	9.17771	1090.77	2.11965	272.96	0.33275	39.3204	0.516649	55.4617	PGSC0003DMT400042499	ATP synthase gamma chain, chloroplastic	chr03	ATP synthase gamma chain, chloroplastic	PGSC0003DMP400028825	PGSC0003DMG400016482	PGSC0003DMC400028825	PGSC0003DMT400042499	1.1.4.4	PS.lightreaction.ATP synthase.gamma chain	pgsc0003dmp400028825	highly similar to ( 535) AT4G04640 | Symbols: ATPC1 | ATPC1; enzyme regulator | chr4:2350761-2351882 REVERSEhighly similar to ( 588) ATPG_TOBAC ATP synthase gamma chain, chloroplast precursor (EC 3.6.3.14) - Nicotiana tabacum (Common tobacco)moderately similar to ( 471) loc_os07g32880 12007.m07550 protein ATP synthase gamma chain, chloroplast precursor, putative, expressedATP-synt PRK05621 AtpG P…	GO:0009941;GO:0045261;GO:0009544	GO:0046961;GO:0046933;GO:0030234	GO:0009772;GO:0015986
CUST_26992_PI426222305	0.579352	26.8233	0.752729	24.8783	0.430167	18.128	4.67185	247.096	5.24587	208.643	1.73012	73.9989	0.492772	21.6704	0.312868	12.4265	PGSC0003DMT400052738	ATP synthase subunit b', chloroplastic	chr06	ATP synthase subunit b', chloroplastic	PGSC0003DMP400035552	PGSC0003DMG400020466	PGSC0003DMC400035552	PGSC0003DMT400052738	1.1.4	PS.lightreaction.ATP synthase	pgsc0003dmp400035552	weakly similar to ( 145) AT4G32260 | Symbols: | ATP synthase family | chr4:15573859-15574586 REVERSEweakly similar to ( 159) ATPX_SPIOL ATP synthase B' chain, chloroplast precursor (EC 3.6.3.14) (Subunit II) - Spinacia oleracea (Spinach)weakly similar to ( 138) loc_os03g17070 12003.m07139 protein ATP synthase B chain, chloroplast precursor, putative, expressedPRK07353 atpG ATP-synt_B PGSC0003DMT4…	GO:0044424	GO:0008146	GO:0009812
CUST_13744_PI426222305	0.86109	565.385	1.3601	867.862	0.610182	413.208	2.61947	2651.14	2.33069	1680.51	1.2857	1018.84	0.739767	526.375	0.81798	529.324	PGSC0003DMT400018038	ATP synthase	chr05	ATP synthase	PGSC0003DMP400012415	PGSC0003DMG400007007	PGSC0003DMC400012415	PGSC0003DMT400018038	1.1.4.7	PS.lightreaction.ATP synthase.delta chain	pgsc0003dmp400012415	very weakly similar to (88.2) AT4G09650 | Symbols: ATPD | ATPD (ATP SYNTHASE DELTA-SUBUNIT GENE); hydrogen ion transporting ATP synthase, rotational mechanism / proton-transporting ATPase, rotational mechanism | chr4:6100799-6101503 FORWARDvery weakly similar to (91.7) ATPD_TOBAC ATP synthase delta chain, chloroplast precursor (EC 3.6.3.14) - Nicotiana tabacum (Common tobacco)very weakly similar …
CUST_19111_PI426222305	0.681688	11.4006	0.840475	13.6658	0.944572	16.1231	4.81036	149.628	3.38481	60.9823	2.20539	73.5854	0.506614	9.94535	0.670314	11.7513	PGSC0003DMT400052662	Conserved gene of unknown function	chr07	Conserved gene of unknown function	PGSC0003DMP400035510	PGSC0003DMG400020443	PGSC0003DMC400035510	PGSC0003DMT400052662	1.1.4	PS.lightreaction.ATP synthase	pgsc0003dmp400035510	moderately similar to ( 326) AT2G31040 | Symbols: | ATP synthase protein I -related | chr2:13209094-13211012 REVERSEmoderately similar to ( 273) loc_os01g48300 12001.m43139 protein expressed protein PGSC0003DMT400052662	GO:0005886		GO:0008150
CUST_40721_PI426222305	0.976255	548.988	1.09928	584.749	0.918519	537.739	0.86947	762.678	1.13988	718.669	0.919754	629.022	0.944425	573.727	1.10209	618.955	PGSC0003DMT400084531	H+transporting two-sector ATPase beta chain	chr07	H+transporting two-sector ATPase beta chain	PGSC0003DMP400056384	PGSC0003DMG400034122	PGSC0003DMC400056384	PGSC0003DMT400084531	1.1.4.2	PS.lightreaction.ATP synthase.beta subunit	pgsc0003dmp400056384	very weakly similar to (99.8) ATCG00480 | Symbols: ATPB | chloroplast-encoded gene for beta subunit of ATP synthase | chrC:52660-54156 REVERSEweakly similar to ( 125) ATPB_TOBAC ATP synthase subunit beta (EC 3.6.3.14) (ATPase subunit beta) (ATP synthase F1 sector subunit beta) - Nicotiana tabacum (Common tobacco)very weakly similar to (94.0) loc_os10g21270 12010.m05145 protein ATP synthase beta c…
CUST_19184_PI426222305	1.05518	11971.8	1.11503	11677.8	0.905019	10731.5	0.840547	14761.6	1.11521	14223.5	0.777836	10896.3	0.827888	10430.9	1.13091	12803.9	PGSC0003DMT400064608	ATP synthase epsilon chain, chloroplastic	chr05	ATP synthase epsilon chain, chloroplastic	PGSC0003DMP400043561	PGSC0003DMG400025106	PGSC0003DMC400043561	PGSC0003DMT400064608	1.1.4.3	PS.lightreaction.ATP synthase.epsilon chain	pgsc0003dmp400043561	moderately similar to ( 205) ATCG00470 | Symbols: ATPE | ATPase epsilon subunit | chrC:52265-52663 REVERSEmoderately similar to ( 229) ATPE_TOBAC ATP synthase epsilon chain (EC 3.6.3.14) (ATP synthase F1 sector epsilon subunit) - Nicotiana tabacum (Common tobacco)weakly similar to ( 173) loc_os01g58000 12001.m11947 protein ATP synthase epsilon chain, putative, expressedatpE atpC AtpC ATP-synt_DE_…
CUST_15242_PI426222305	1.01187	3044.29	0.982659	2689.9	0.913343	2897.23	0.761781	3771.96	0.831489	3026.78	0.868911	3141.66	0.823747	2631.51	1.01328	3004.19	PGSC0003DMT400057252	ATP synthase subunit alpha, mitochondrial	chr07	ATP synthase subunit alpha, mitochondrial	PGSC0003DMP400038511	PGSC0003DMG401022238	PGSC0003DMC400038511	PGSC0003DMT400057252	1.1.4	PS.lightreaction.ATP synthase	pgsc0003dmp400038511	moderately similar to ( 423) AT2G07698 | Symbols: | ATP synthase alpha chain, mitochondrial, putative | chr2:3361474-3364028 FORWARDmoderately similar to ( 442) ATPAM_NICPL ATP synthase subunit alpha, mitochondrial (EC 3.6.3.14) - Nicotiana plumbaginifolia (Leadwort-leaved tobacco)moderately similar to ( 402) loc_osm1g00580 11706.m00050 protein ATP synthase F0 subunit 1PRK09281 AtpA atpA F1_ATPas…

## Sheet: BIN1 Other Photosyn TableS15 
Code ()*	WL6		Blue6		Red6		WL24		Blue24		Red24		Dark (18oC)		Dark (21oC)
Systematic	Normalized	Raw	Normalized	Raw	Normalized	Raw	Normalized	Raw	Normalized	Raw	Normalized	Raw	Normalized	Raw	Normalized	Raw	PrimaryAccession	UniRef based putative functional annotation	Chromosome	putative function	peptide ID	gene ID	CDS ID	transcript ID	MpMan bin	MapMan name	MapMan pep	MapMan description	GO: CC	GO: MF	GO: BP
CUST_9621_PI426222305	0.982703	30.1521	0.936145	27.0518	0.809437	26.953	1.18832	72.7967	1.43895	49.2372	1.1187	44.7864	0.840531	28.9218	0.751547	24.8826	PGSC0003DMT400006828	NAD(P)H-quinone oxidoreductase subunit J, chloroplastic	chr03	NAD(P)H-quinone oxidoreductase subunit J, chloroplastic	PGSC0003DMP400004746	PGSC0003DMG400002651	PGSC0003DMC400004746	PGSC0003DMT400006828	1.1.6	PS.lightreaction.NADH DH	pgsc0003dmp400004746	weakly similar to ( 159) ATCG00420 | Symbols: NDHJ | Encodes NADH dehydrogenase subunit J. Its transcription is increased upon sulfur depletion. | chrC:48677-49153 REVERSEweakly similar to ( 181) NDHJ_TOBAC NAD(P)H-quinone oxidoreductase chain J, chloroplast (EC 1.6.5.-) (NAD(P)H dehydrogenase, chain J) (NADH-plastoquinone oxidoreductase subunit J) - Nicotiana tabacum (Common tobacco)weakly simil…	GO:0009535	GO:0008137;GO:0048038	GO:0006810;GO:0019684
CUST_7728_PI426222305	0.93903	371.208	1.38039	550.591	0.279792	119.469	12.2398	7469.08	16.3318	7175.27	3.31511	1616.08	0.204553	87.5925	0.365716	150.39	PGSC0003DMT400092049	Plastocyanin, chloroplastic	chr04	Plastocyanin, chloroplastic	PGSC0003DMP400063724	PGSC0003DMG400041620	PGSC0003DMC400063724	PGSC0003DMT400092049	1.1.5.1	PS.lightreaction.other electron carrier (ox/red).plastocyanin	pgsc0003dmp400063724	weakly similar to ( 159) AT1G20340 | Symbols: DRT112, PETE2 | DRT112; copper ion binding / electron carrier | chr1:7042770-7043273 REVERSEweakly similar to ( 167) PLAS_SOLTU Plastocyanin - Solanum tuberosum (Potato)weakly similar to ( 119) loc_os06g01210 12006.m04861 protein plastocyanin, chloroplast precursor, putative, expressedCopper-bind PRK02710 PGSC0003DMT400092049
CUST_28319_PI426222305	0.614317	55.6185	1.64027	92.7903	0.140351	8.9225	17.6611	1587.24	15.7767	1072.22	2.08772	166.153	0.10248	6.8795	0.0863319	4.22686	PGSC0003DMT400044283	Proton gradient regulation 5	chr09	Proton gradient regulation 5	PGSC0003DMP400030037	PGSC0003DMG400017198	PGSC0003DMC400030037	PGSC0003DMT400044283	1.1.40	PS.lightreaction.cyclic electron flow-chlororespiration	pgsc0003dmp400030037	weakly similar to ( 145) AT2G05620 | Symbols: PGR5 | PGR5 (proton gradient regulation 5); electron carrier | chr2:2081204-2081687 REVERSEweakly similar to ( 129) loc_os08g45190 12008.m08489 protein PGR5, putative, expressed PGSC0003DMT400044283
CUST_41789_PI426222305	1.02936	46.3141	1.24438	53.0802	0.619326	29.6269	1.92709	152.348	2.00267	100.389	1.35591	81.2352	0.616202	30.4907	0.505188	25.9009	PGSC0003DMT400015586	Conserved gene of unknown function	chr09	Conserved gene of unknown function	PGSC0003DMP400010795	PGSC0003DMG400006084	PGSC0003DMC400010795	PGSC0003DMT400015586	1.1.6	PS.lightreaction.NADH DH	pgsc0003dmp400010795	moderately similar to ( 294) AT5G58260 | Symbols: | Encodes subunit NDH-N of NAD(P)H:plastoquinone dehydrogenase complex (Ndh complex) present in the thylakoid membrane of chloroplasts. This subunit is thought to be required for Ndh complex assembly. | chr5:23561356-23561929 REVERSEmoderately similar to ( 284) loc_os01g66000 12001.m12708 protein NADH dehydrogenase I subunit N, putative, expressed…
CUST_5228_PI426222305	0.421505	15.9467	1.61634	54.0807	0.316234	11.917	8.94672	495.71	6.56464	272.424	2.87525	134.205	0.24181	10.8748	0.463555	18.3816	PGSC0003DMT400009192	Ferredoxin--NADP reductase, leaf-type isozyme, chloroplastic	chr09	Ferredoxin--NADP reductase, leaf-type isozyme, chloroplastic	PGSC0003DMP400006368	PGSC0003DMG402003567	PGSC0003DMC400006368	PGSC0003DMT400009192	1.1.5.3	PS.lightreaction.other electron carrier (ox/red).ferredoxin reductase	pgsc0003dmp400006368	highly similar to ( 574) AT1G20020 | Symbols: ATLFNR2 | FNR2 (FERREDOXIN-NADP()-OXIDOREDUCTASE 2); NADPH dehydrogenase/ oxidoreductase/ poly(U) binding | chr1:6942851-6944868 FORWARDhighly similar to ( 673) FENR1_TOBAC Ferredoxin--NADP reductase, leaf-type isozyme, chloroplast precursor (EC 1.18.1.2) (FNR) - Nicotiana tabacum (Common tobacco)highly similar to ( 562) loc_os06g01850 12006.m04921 pr…
CUST_52274_PI426222305	0.472013	12.9049	1.63274	37.6307	0.342971	7.9417	10.5569	351.008	9.12447	228.238	2.81761	78.0226	0.29872	7.09185	0.455369	9.97222	PGSC0003DMT400003234	Electron carrier		Electron carrier	PGSC0003DMP400002305	PGSC0003DMG400001278	PGSC0003DMC400002305	PGSC0003DMT400003234	1.1.5.2	PS.lightreaction.other electron carrier (ox/red).ferredoxin	pgsc0003dmp400002305	weakly similar to ( 184) AT4G32590 | Symbols: | ferredoxin-related | chr4:15721417-15722781 FORWARDweakly similar to ( 181) loc_os05g48160 12005.m27636 protein electron carrier/ electron transporter/ iron ion binding protein, putative, expressed PGSC0003DMT400003234
CUST_33600_PI426222305	0.509518	9.43027	1.29646	25.2852	0.478562	9.89076	12.4146	339.37	10.6316	211.096	3.3284	88.8804	0.299873	5.69589	0.632539	13.296	PGSC0003DMT400078666	Serine hydroxymethyltransferase, mitochondrial	chr02	Serine hydroxymethyltransferase, mitochondrial	PGSC0003DMP400053311	PGSC0003DMG400030612	PGSC0003DMC400053311	PGSC0003DMT400078666	1.2.5	PS.photorespiration.serine hydroxymethyltransferase	pgsc0003dmp400053311	highly similar to ( 919) AT4G37930 | Symbols: SHM1, STM, SHMT1 | SHM1 (SERINE TRANSHYDROXYMETHYLTRANSFERASE 1); glycine hydroxymethyltransferase/ poly(U) binding | chr4:17831891-17834742 REVERSEnearly identical (1013) GLYM_SOLTU Serine hydroxymethyltransferase, mitochondrial precursor (EC 2.1.2.1) (Serine methylase) (Glycine hydroxymethyltransferase) (SHMT) - Solanum tuberosum (Potato)highly simi…	GO:0005886;GO:0005634;GO:0009534;GO:0048046;GO:0009570;GO:0005759;GO:0010319;GO:0022626	GO:0030170;GO:0008266;GO:0004372	GO:0009409;GO:0046686;GO:0009416;GO:0007623;GO:0009853;GO:0006563;GO:0009626;GO:0019464;GO:0006730
CUST_36122_PI426222305	0.551879	31.9895	1.65966	91.1736	0.442493	23.7132	4.77624	380.68	4.76617	274.9	2.64941	165.429	0.27624	16.916	0.573393	29.8962	PGSC0003DMT400058521	PGR5 1A, chloroplastic	chr08	PGR5 1A, chloroplastic	PGSC0003DMP400039411	PGSC0003DMG400022731	PGSC0003DMC400039411	PGSC0003DMT400058521	1.1.40	PS.lightreaction.cyclic electron flow-chlororespiration	pgsc0003dmp400039411	moderately similar to ( 402) AT4G22890 | Symbols: PGR5-LIKE A | PGR5-LIKE A | chr4:12007157-12009175 FORWARDmoderately similar to ( 382) loc_os08g41460 12008.m080214 protein expressed protein PGSC0003DMT400058521	GO:0016021;GO:0009535		GO:0009773
CUST_35451_PI426222305	0.656613	115.336	1.4807	239.345	0.616301	109.153	3.44069	949.807	3.17416	607.702	2.31674	487.909	0.420998	80.0793	0.677971	118.904	PGSC0003DMT400032523	PGR5 1B, chloroplastic	chr08	PGR5 1A, chloroplastic	PGSC0003DMP400022103	PGSC0003DMG400012494	PGSC0003DMC400022103	PGSC0003DMT400032523	1.1.40	PS.lightreaction.cyclic electron flow-chlororespiration	pgsc0003dmp400022103	weakly similar to ( 188) AT4G11960 | Symbols: PGRL1B | PGRL1B (PGR5-Like B) | chr4:7175340-7177709 REVERSEweakly similar to ( 183) loc_os03g64020 12003.m11268 protein expressed protein PGSC0003DMT400032523
CUST_35481_PI426222305	0.683913	107.362	1.49781	217.418	0.66835	105.737	3.43015	795.227	3.97415	665.201	2.10651	416.471	0.426642	74.7848	0.792507	122.148	PGSC0003DMT400032525	PGR5 1A, chloroplastic	chr08	PGR5 1A, chloroplastic	PGSC0003DMP400022105	PGSC0003DMG400012494	PGSC0003DMC400022105	PGSC0003DMT400032525	1.1.40	PS.lightreaction.cyclic electron flow-chlororespiration	pgsc0003dmp400022105	moderately similar to ( 415) AT4G22890 | Symbols: PGR5-LIKE A | PGR5-LIKE A | chr4:12007157-12009175 FORWARDmoderately similar to ( 392) loc_os08g41460 12008.m080214 protein expressed protein PGSC0003DMT400032525	GO:0016021;GO:0009535		GO:0009773
CUST_35453_PI426222305	0.817807	40.9798	1.45556	69.745	0.678376	35.267	3.80597	294.711	4.07952	225.145	2.45522	150.188	0.36459	21.202	0.705923	35.7254	PGSC0003DMT400032522	PGR5 1A, chloroplastic	chr08	PGR5 1A, chloroplastic	PGSC0003DMP400022102	PGSC0003DMG400012494	PGSC0003DMC400022102	PGSC0003DMT400032522	1.1.40	PS.lightreaction.cyclic electron flow-chlororespiration	pgsc0003dmp400022102	moderately similar to ( 284) AT4G22890 | Symbols: PGR5-LIKE A | PGR5-LIKE A | chr4:12007157-12009175 FORWARDmoderately similar to ( 285) loc_os03g64020 12003.m11268 protein expressed protein PGSC0003DMT400032522
CUST_35530_PI426222305	0.438391	5.18556	1.6184	18.5153	0.435133	5.65321	2.63209	52.3692	2.26635	31.527	2.66467	41.6135	0.383744	4.80471	0.483756	6.05271	PGSC0003DMT400032526	PGR5 1B, chloroplastic	chr08	PGR5 1A, chloroplastic	PGSC0003DMP400022106	PGSC0003DMG400012494	PGSC0003DMC400022106	PGSC0003DMT400032526	1.1.40	PS.lightreaction.cyclic electron flow-chlororespiration	pgsc0003dmp400022106	weakly similar to ( 191) AT4G11960 | Symbols: PGRL1B | PGRL1B (PGR5-Like B) | chr4:7175340-7177709 REVERSEweakly similar to ( 184) loc_os08g41460 12008.m080214 protein expressed protein PGSC0003DMT400032526
CUST_20021_PI426222305	0.830157	94.3367	1.01522	102.981	0.963311	109.461	1.21961	234.729	1.33451	164.624	1.04023	139.769	0.84622	99.8693	0.88193	97.7253	PGSC0003DMT400049468	NAD(P)H-quinone oxidoreductase subunit J, chloroplastic	chr10	NAD(P)H-quinone oxidoreductase subunit J, chloroplastic	PGSC0003DMP400033395	PGSC0003DMG400019224	PGSC0003DMC400033395	PGSC0003DMT400049468	1.1.6	PS.lightreaction.NADH DH	pgsc0003dmp400033395	weakly similar to ( 142) ATCG00420 | Symbols: NDHJ | Encodes NADH dehydrogenase subunit J. Its transcription is increased upon sulfur depletion. | chrC:48677-49153 REVERSEweakly similar to ( 157) NDHJ_TOBAC NAD(P)H-quinone oxidoreductase chain J, chloroplast (EC 1.6.5.-) (NAD(P)H dehydrogenase, chain J) (NADH-plastoquinone oxidoreductase subunit J) - Nicotiana tabacum (Common tobacco)weakly simil…	GO:0009535	GO:0008137;GO:0048038	GO:0006810;GO:0019684
CUST_9460_PI426222305	0.996743	6.02769	1.03978	5.72412	0.760267	4.0104	4.91752	51.3914	2.7842	19.9496	1.60035	14.1768	0.894638	6.19411	0.79717	3.84424	PGSC0003DMT400006577	D-glycerate 3-kinase, chloroplast	chr03	D-glycerate 3-kinase, chloroplast	PGSC0003DMP400004563	PGSC0003DMG400002559	PGSC0003DMC400004563	PGSC0003DMT400006577	1.2.7	PS.photorespiration.glycerate kinase	pgsc0003dmp400004563	moderately similar to ( 353) AT1G80380 | Symbols: | phosphoribulokinase/uridine kinase-related | chr1:30217895-30219784 FORWARDmoderately similar to ( 338) loc_os01g48990 12001.m150688 protein protein Kinase C630.09c, putative, expressedCOG4240 PGSC0003DMT400006577
CUST_36741_PI426222305	0.834379	4.3521	1.04465	5.52492	0.79833	4.53936	10.6984	108.511	5.97104	42.1867	1.96632	25.3561	1.214	8.23941	0.83708	4.52674	PGSC0003DMT400015828	Hydroxypyruvate reductase	chr01	Hydroxypyruvate reductase	PGSC0003DMP400010972	PGSC0003DMG400006186	PGSC0003DMC400010972	PGSC0003DMT400015828	1.2.6	PS.photorespiration.hydroxypyruvate reductase	pgsc0003dmp400010972	highly similar to ( 690) AT1G68010 | Symbols: HPR | HPR; glycerate dehydrogenase/ poly(U) binding | chr1:25493418-25495720 FORWARDhighly similar to ( 687) DHGY_CUCSA Glycerate dehydrogenase (EC 1.1.1.29) (NADH-dependent hydroxypyruvate reductase) (HPR) (GDH) - Cucumis sativus (Cucumber)highly similar to ( 684) loc_os02g01150 12002.m33493 protein hydroxypyruvate reductase, putative, expressed2-Hac…
CUST_32817_PI426222305	0.9678	4.15664	1.04699	4.19334	0.925987	4.13786	15.2264	134.097	10.1878	64.7687	1.82926	14.2912	0.892322	4.63321	0.970934	3.95053	PGSC0003DMT400065148	NADH dehydrogenase	chr04	NADH dehydrogenase	PGSC0003DMP400043927	PGSC0003DMG400025319	PGSC0003DMC400043927	PGSC0003DMT400065148	1.1.6	PS.lightreaction.NADH DH	pgsc0003dmp400043927	moderately similar to ( 232) AT4G37925 | Symbols: NDH-M | NDH-M (subunit NDH-M of NAD(P)H:plastoquinone dehydrogenase complex) | chr4:17830748-17831485 REVERSEmoderately similar to ( 224) loc_os04g45600 12004.m09513 protein expressed protein PGSC0003DMT400065148	GO:0009535;GO:0010598	GO:0048038;GO:0016655	GO:0055114;GO:0010258
CUST_51089_PI426222305	0.96059	4.1723	1.03919	4.32337	0.919088	4.29947	7.56627	64.0846	6.09964	36.3816	2.28733	21.2406	0.885675	4.47414	0.9637	4.1701	PGSC0003DMT400031198	Chloroplast ferredoxin I		Chloroplast ferredoxin I	PGSC0003DMP400021165	PGSC0003DMG400011950	PGSC0003DMC400021165	PGSC0003DMT400031198	1.1.5.2	PS.lightreaction.other electron carrier (ox/red).ferredoxin	pgsc0003dmp400021165	weakly similar to ( 183) AT1G60950 | Symbols: FED A, ATFD2 | FED A; 2 iron, 2 sulfur cluster binding / electron carrier/ iron-sulfur cluster binding | chr1:22444565-22445011 FORWARDmoderately similar to ( 220) FER_CAPAN Ferredoxin, chloroplast precursor (PFLP) - Capsicum annuum (Bell pepper)weakly similar to ( 151) loc_os08g01380 12008.m080056 protein ferredoxin-1, chloroplast precursor, putative…
CUST_26221_PI426222305	0.627645	4.39465	0.961419	7.52803	0.687753	5.72437	13.3903	167.004	17.4111	155.735	2.36183	24.7672	0.672026	5.71525	0.629677	4.36709	PGSC0003DMT400041729	4-nitrophenylphosphatase	chr11	4-nitrophenylphosphatase	PGSC0003DMP400028271	PGSC0003DMG400016181	PGSC0003DMC400028271	PGSC0003DMT400041729	1.2.1	PS.photorespiration.phosphoglycolate phosphatase	pgsc0003dmp400028271	moderately similar to ( 491) AT5G36790 | Symbols: | phosphoglycolate phosphatase, putative | chr5:14481229-14483730 REVERSEmoderately similar to ( 496) loc_os04g41340 12004.m09113 protein 4-nitrophenylphosphatase, putative, expressedNagD PRK10444 PGSC0003DMT400041729
CUST_51085_PI426222305	0.696762	5.39527	0.752301	5.35976	1.53548	16.0493	24.3404	309.462	20.3894	198.128	4.62273	60.2557	0.790156	6.94157	0.721148	5.44044	PGSC0003DMT400087715	Ferredoxin II		Ferredoxin II	PGSC0003DMP400059390	PGSC0003DMG400037286	PGSC0003DMC400059390	PGSC0003DMT400087715	1.1.5.2	PS.lightreaction.other electron carrier (ox/red).ferredoxin	pgsc0003dmp400059390	weakly similar to ( 125) AT1G60950 | Symbols: FED A, ATFD2 | FED A; 2 iron, 2 sulfur cluster binding / electron carrier/ iron-sulfur cluster binding | chr1:22444565-22445011 FORWARDweakly similar to ( 133) FER_CAPAN Ferredoxin, chloroplast precursor (PFLP) - Capsicum annuum (Bell pepper)weakly similar to ( 122) loc_os08g01380 12008.m080056 protein ferredoxin-1, chloroplast precursor, putative, ex…
CUST_40194_PI426222305	0.860651	19.8359	1.23624	27.1696	0.925445	21.7188	24.1936	834.67	25.3891	629.318	4.78818	134.995	0.288612	7.63315	0.374668	8.9536	PGSC0003DMT400005383	Mitochondrial glycine decarboxylase complex H-protein	chr06	Mitochondrial glycine decarboxylase complex H-protein	PGSC0003DMP400003772	PGSC0003DMG400002103	PGSC0003DMC400003772	PGSC0003DMT400005383	1.2.4.4	PS.photorespiration.glycine cleavage.H protein	pgsc0003dmp400003772	moderately similar to ( 221) AT1G32470 | Symbols: | glycine cleavage system H protein, mitochondrial, putative | chr1:11739479-11740246 REVERSEmoderately similar to ( 234) GCSH_FLAPR Glycine cleavage system H protein, mitochondrial precursor - Flaveria pringleimoderately similar to ( 219) loc_os10g37180 12010.m06515 protein glycine cleavage system H protein, mitochondrial precursor, putative, exp…
CUST_8104_PI426222305	0.849417	191.053	0.990749	205.021	0.941094	220.092	1.59708	611.514	1.26979	315.868	1.10215	306.296	0.784535	190.426	0.928976	208.515	PGSC0003DMT400075569	Serine hydroxymethyltransferase	chr12	Serine hydroxymethyltransferase	PGSC0003DMP400051179	PGSC0003DMG400029389	PGSC0003DMC400051179	PGSC0003DMT400075569	1.2.5	PS.photorespiration.serine hydroxymethyltransferase	pgsc0003dmp400051179	weakly similar to ( 152) AT4G32520 | Symbols: SHM3 | SHM3 (SERINE HYDROXYMETHYLTRANSFERASE 3); catalytic/ glycine hydroxymethyltransferase/ pyridoxal phosphate binding | chr4:15689642-15692334 REVERSEvery weakly similar to (89.4) GLYM_SOLTU Serine hydroxymethyltransferase, mitochondrial precursor (EC 2.1.2.1) (Serine methylase) (Glycine hydroxymethyltransferase) (SHMT) - Solanum tuberosum (Potato…		GO:0004372	GO:0006544;GO:0006563
CUST_48850_PI426222305	0.905437	4.09684	1.44736	7.48336	1.09974	6.27435	2.96536	58.6818	2.2889	14.1332	1.69234	22.9848	0.976802	5.75401	0.908368	3.8723	PGSC0003DMT400028093	Serine hydroxymethyltransferase	chr08	Serine hydroxymethyltransferase	PGSC0003DMP400019153	PGSC0003DMG400010835	PGSC0003DMC400019153	PGSC0003DMT400028093	1.2.5	PS.photorespiration.serine hydroxymethyltransferase	pgsc0003dmp400019153	weakly similar to ( 123) AT5G26780 | Symbols: SHM2 | SHM2 (SERINE HYDROXYMETHYLTRANSFERASE 2); catalytic/ glycine hydroxymethyltransferase/ pyridoxal phosphate binding | chr5:9418299-9421725 FORWARDweakly similar to ( 125) GLYM_PEA Serine hydroxymethyltransferase, mitochondrial precursor (EC 2.1.2.1) (Serine methylase) (Glycine hydroxymethyltransferase) (SHMT) - Pisum sativum (Garden pea)weakly s…	GO:0005739	GO:0030170;GO:0004372	GO:0006544;GO:0006563
CUST_33595_PI426222305	0.682646	37.9241	1.10084	55.2185	0.799009	45.5051	2.64985	266.392	2.03008	122.682	1.16392	82.052	0.818713	48.512	0.872711	49.2586	PGSC0003DMT400078670	Endoribonuclease E	chr02	Endoribonuclease E	PGSC0003DMP400053314	PGSC0003DMG400030614	PGSC0003DMC400053314	PGSC0003DMT400078670	1.1.6	PS.lightreaction.NADH DH	pgsc0003dmp400053314	moderately similar to ( 454) AT4G37920 | Symbols: | unknown protein | chr4:17828538-17830317 REVERSEmoderately similar to ( 418) loc_os01g20110 12001.m42980 protein expressed protein PGSC0003DMT400078670	GO:0009941;GO:0009535	GO:0016655	GO:0008150
CUST_9329_PI426222305	1.51409	9.06867	1.00519	4.9716	0.875822	4.70492	5.49242	48.6333	2.90019	19.261	1.50469	14.2125	0.847778	5.10456	0.903488	4.4806	PGSC0003DMT400006578	D-glycerate 3-kinase, chloroplast	chr03	D-glycerate 3-kinase, chloroplast	PGSC0003DMP400004564	PGSC0003DMG400002559	PGSC0003DMC400004564	PGSC0003DMT400006578	1.2.7	PS.photorespiration.glycerate kinase	pgsc0003dmp400004564	highly similar to ( 578) AT1G80380 | Symbols: | phosphoribulokinase/uridine kinase-related | chr1:30217895-30219784 FORWARDhighly similar to ( 553) loc_os01g48990 12001.m150688 protein protein Kinase C630.09c, putative, expressedCOG4240 PGSC0003DMT400006578	GO:0005634;GO:0009941;GO:0009570	GO:0005524;GO:0008887	GO:0009854
CUST_19758_PI426222305	0.92899	671.436	1.0626	709.947	0.770557	586.581	1.80652	2020.09	2.15746	1761.74	0.95401	867.176	0.724838	567.835	1.32603	965.175	PGSC0003DMT400011522	Chloroplast ferredoxin I	chr01	Chloroplast ferredoxin I	PGSC0003DMP400008007	PGSC0003DMG400004532	PGSC0003DMC400008007	PGSC0003DMT400011522	1.1.5.2	PS.lightreaction.other electron carrier (ox/red).ferredoxin	pgsc0003dmp400008007	weakly similar to ( 134) AT1G60950 | Symbols: FED A, ATFD2 | FED A; 2 iron, 2 sulfur cluster binding / electron carrier/ iron-sulfur cluster binding | chr1:22444565-22445011 FORWARDweakly similar to ( 185) FER_CAPAN Ferredoxin, chloroplast precursor (PFLP) - Capsicum annuum (Bell pepper)weakly similar to ( 122) loc_os08g01380 12008.m080056 protein ferredoxin-1, chloroplast precursor, putative, ex…	GO:0009507	GO:0046872;GO:0009055;GO:0051537	GO:0022900
CUST_17858_PI426222305	0.842122	121.486	1.11897	159.77	0.63578	95.365	2.1913	485.173	2.6803	440.934	1.02348	180.755	0.880507	142.358	1.04732	154.545	PGSC0003DMT400071115	Glycolate oxidase	chr07	Glycolate oxidase	PGSC0003DMP400048099	PGSC0003DMG400027654	PGSC0003DMC400048099	PGSC0003DMT400071115	1.2.2	PS.photorespiration.glycolate oxydase	pgsc0003dmp400048099	highly similar to ( 650) AT3G14415 | Symbols: | (S)-2-hydroxy-acid oxidase, peroxisomal, putative / glycolate oxidase, putative / short chain alpha-hydroxy acid oxidase, putative | chr3:4818667-4820748 FORWARDhighly similar to ( 645) GOX_SPIOL Peroxisomal (S)-2-hydroxy-acid oxidase (EC 1.1.3.15) (Glycolate oxidase) (GOX) (Short chain alpha-hydroxy acid oxidase) - Spinacia oleracea (Spinach)highly…	GO:0005777;GO:0005634;GO:0005773;GO:0009506;GO:0048046;GO:0009570;GO:0022626	GO:0010181;GO:0008891;GO:0018580	GO:0055114;GO:0042742;GO:0050665;GO:0009854
CUST_11326_PI426222305	0.930455	150.88	1.14367	171.632	1.00955	172.597	1.54067	386.728	1.67772	304.176	0.902177	180.658	0.901642	159.479	0.9211	151.496	PGSC0003DMT400078506	Fruit protein PKIWI502	chr05	Fruit protein PKIWI502	PGSC0003DMP400053196	PGSC0003DMG400030559	PGSC0003DMC400053196	PGSC0003DMT400078506	1.1.5.4	PS.lightreaction.other electron carrier (ox/red).ferredoxin oxireductase	pgsc0003dmp400053196	moderately similar to ( 351) AT1G15140 | Symbols: | oxidoreductase NAD-binding domain-containing protein | chr1:5210642-5212137 REVERSEmoderately similar to ( 243) K502_ACTCH Fruit protein PKIWI502 - Actinidia chinensis (Kiwi) (Yangtao)moderately similar to ( 283) loc_os02g22260 12002.m33669 protein fruit protein PKIWI502, putative, expressedUbiB NAD_binding_1 Hmp PGSC0003DMT400078506	GO:0009941;GO:0009570;GO:0009579	GO:0005507;GO:0016491	GO:0055114
CUST_13776_PI426222305	0.902649	194.285	1.02669	202.608	0.944381	209.565	1.16306	392.62	1.40578	332.921	0.97541	254.443	0.996317	229.601	0.924013	197.232	PGSC0003DMT400017976	NAD(P)H-quinone oxidoreductase subunit K, chloroplastic	chr05	NAD(P)H-quinone oxidoreductase subunit K, chloroplastic	PGSC0003DMP400012373	PGSC0003DMG400006986	PGSC0003DMC400012373	PGSC0003DMT400017976	1.1.6	PS.lightreaction.NADH DH	pgsc0003dmp400012373	moderately similar to ( 372) ATCG00430 | Symbols: PSBG | Encodes a protein which was originally thought to be part of photosystem II but its wheat homolog was later shown to encode for subunit K of NADH dehydrogenase. | chrC:49257-49934 REVERSEmoderately similar to ( 396) NDHK_TOBAC NAD(P)H-quinone oxidoreductase chain K, chloroplast (EC 1.6.5.-) (NAD(P)H dehydrogenase, chain K) (NADH-plastoquino…
CUST_8095_PI426222305	0.824263	183.928	1.0121	209.31	1.0363	242.78	1.33095	494.72	1.20612	301.022	0.932029	255.208	0.719819	176.024	0.902543	203.015	PGSC0003DMT400075570	Serine hydroxymethyltransferase	chr07	Serine hydroxymethyltransferase	PGSC0003DMP400051180	PGSC0003DMG400029389	PGSC0003DMC400051180	PGSC0003DMT400075570	1.2.5	PS.photorespiration.serine hydroxymethyltransferase	pgsc0003dmp400051180	highly similar to ( 541) AT4G32520 | Symbols: SHM3 | SHM3 (SERINE HYDROXYMETHYLTRANSFERASE 3); catalytic/ glycine hydroxymethyltransferase/ pyridoxal phosphate binding | chr4:15689642-15692334 REVERSEmoderately similar to ( 384) GLYM_PEA Serine hydroxymethyltransferase, mitochondrial precursor (EC 2.1.2.1) (Serine methylase) (Glycine hydroxymethyltransferase) (SHMT) - Pisum sativum (Garden pea)mo…		GO:0004372	GO:0006544;GO:0006563
CUST_29981_PI426222305	0.88556	26.2825	0.981059	26.6847	1.13703	35.0068	1.63888	74.6939	1.58791	53.5344	1.12708	42.0146	0.616934	19.8773	0.706929	20.7858	PGSC0003DMT400005610	Serine hydroxymethyltransferase	chr08	Serine hydroxymethyltransferase	PGSC0003DMP400003924	PGSC0003DMG400002200	PGSC0003DMC400003924	PGSC0003DMT400005610	1.2.5	PS.photorespiration.serine hydroxymethyltransferase	pgsc0003dmp400003924	moderately similar to ( 476) AT4G32520 | Symbols: SHM3 | SHM3 (SERINE HYDROXYMETHYLTRANSFERASE 3); catalytic/ glycine hydroxymethyltransferase/ pyridoxal phosphate binding | chr4:15689642-15692334 REVERSEmoderately similar to ( 345) GLYM_PEA Serine hydroxymethyltransferase, mitochondrial precursor (EC 2.1.2.1) (Serine methylase) (Glycine hydroxymethyltransferase) (SHMT) - Pisum sativum (Garden pe…		GO:0004372	GO:0006544;GO:0006563
CUST_29998_PI426222305	0.709585	6.78114	0.732681	6.53624	0.95798	10.5638	2.98699	62.1167	1.82176	20.2491	0.777127	13.3253	0.473951	4.44822	0.908101	9.19707	PGSC0003DMT400005611	Serine hydroxymethyltransferase	chr08	Serine hydroxymethyltransferase	PGSC0003DMP400003925	PGSC0003DMG400002200	PGSC0003DMC400003925	PGSC0003DMT400005611	1.2.5	PS.photorespiration.serine hydroxymethyltransferase	pgsc0003dmp400003925	highly similar to ( 835) AT4G32520 | Symbols: SHM3 | SHM3 (SERINE HYDROXYMETHYLTRANSFERASE 3); catalytic/ glycine hydroxymethyltransferase/ pyridoxal phosphate binding | chr4:15689642-15692334 REVERSEhighly similar to ( 569) GLYM_PEA Serine hydroxymethyltransferase, mitochondrial precursor (EC 2.1.2.1) (Serine methylase) (Glycine hydroxymethyltransferase) (SHMT) - Pisum sativum (Garden pea)highly…	GO:0005886;GO:0005634;GO:0005829;GO:0009534;GO:0048046;GO:0009570;GO:0005759;GO:0010319;GO:0022626	GO:0030170;GO:0008266;GO:0004372	GO:0009409;GO:0046686;GO:0009853;GO:0006544;GO:0006563;GO:0009626;GO:0006730
CUST_14222_PI426222305	0.496001	7.97492	0.836857	13.4353	1.40479	24.1808	2.33707	107.953	1.42428	25.9228	1.18543	25.5056	0.608224	10.5507	0.886241	14.2255	PGSC0003DMT400060121	Ferredoxin-3, chloroplast	chr05	Ferredoxin-3, chloroplast	PGSC0003DMP400040447	PGSC0003DMG400023391	PGSC0003DMC400040447	PGSC0003DMT400060121	1.1.5.2	PS.lightreaction.other electron carrier (ox/red).ferredoxin	pgsc0003dmp400040447	weakly similar to ( 151) AT2G27510 | Symbols: ATFD3 | ATFD3 (ferredoxin 3); 2 iron, 2 sulfur cluster binding / electron carrier/ iron-sulfur cluster binding | chr2:11758281-11758748 REVERSEweakly similar to ( 147) FER2_RAPSA Ferredoxin, root R-B2 - Raphanus sativus (Radish)weakly similar to ( 155) loc_os05g37140 12005.m28058 protein ferredoxin-6, chloroplast precursor, putative, expressedpetF fer…
CUST_25321_PI426222305	1.14999	18.381	0.771165	12.5949	1.13281	20.3815	1.7962	46.355	1.08628	19.6213	0.91109	18.2356	0.68146	13.4479	0.824706	14.1161	PGSC0003DMT400034708	Alternative oxidase	chr11	Alternative oxidase	PGSC0003DMP400023609	PGSC0003DMG400013335	PGSC0003DMC400023609	PGSC0003DMT400034708	1.1.40	PS.lightreaction.cyclic electron flow-chlororespiration	pgsc0003dmp400023609	moderately similar to ( 455) AT4G22260 | Symbols: IM, IM1 | IM (IMMUTANS); alternative oxidase | chr4:11769967-11772350 REVERSEvery weakly similar to (83.2) AOX2_SOYBN Alternative oxidase 2, mitochondrial precursor (EC 1.-.-.-) - Glycine max (Soybean)moderately similar to ( 419) loc_os04g57320 12004.m79006 protein immutans protein, putative, expressedAOX AOX PGSC0003DMT400034708
CUST_9605_PI426222305	0.749523	22.59	1.32143	41.6817	0.851807	27.2135	2.30838	390.23	0.822383	28.0454	2.25594	167.55	0.918263	30.1094	1.35897	42.5814	PGSC0003DMT400058951	(S)-2-hydroxy-acid oxidase	chr03	(S)-2-hydroxy-acid oxidase	PGSC0003DMP400039717	PGSC0003DMG403022901	PGSC0003DMC400039717	PGSC0003DMT400058951	1.2.2	PS.photorespiration.glycolate oxydase	pgsc0003dmp400039717	moderately similar to ( 495) AT3G14130 | Symbols: | (S)-2-hydroxy-acid oxidase, peroxisomal, putative / glycolate oxidase, putative / short chain alpha-hydroxy acid oxidase, putative | chr3:4685844-4687852 REVERSEmoderately similar to ( 393) GOX_SPIOL Peroxisomal (S)-2-hydroxy-acid oxidase (EC 1.1.3.15) (Glycolate oxidase) (GOX) (Short chain alpha-hydroxy acid oxidase) - Spinacia oleracea (Spinac…		GO:0016491	GO:0055114
CUST_42581_PI426222305	1.01844	4.32192	1.52828	7.20818	0.974441	4.27422	2.93431	103.869	1.02307	5.31366	2.38111	41.9319	1.10903	5.79727	1.02174	4.10746	PGSC0003DMT400026828	Cytochrome c6, chloroplastic	chr02	Cytochrome c6, chloroplastic	PGSC0003DMP400018291	PGSC0003DMG400010353	PGSC0003DMC400018291	PGSC0003DMT400026828	1.1.5	PS.lightreaction.other electron carrier (ox/red)	pgsc0003dmp400018291	moderately similar to ( 222) AT5G45040 | Symbols: | cytochrome c6 (ATC6) | chr5:18175566-18176851 REVERSEweakly similar to ( 171) loc_os07g38000 12007.m08049 protein cytochrome c6, putative, expressed PGSC0003DMT400026828
CUST_37266_PI426222305	1.03196	4.8306	1.8587	10.6395	0.997958	4.95027	3.06587	171.625	0.961858	5.20047	2.92129	75.8194	0.998248	5.32596	1.01994	4.67328	PGSC0003DMT400019584	Hydroxyphenylpyruvate reductase	chr12	Hydroxyphenylpyruvate reductase	PGSC0003DMP400013392	PGSC0003DMG400007572	PGSC0003DMC400013392	PGSC0003DMT400019584	1.2.6	PS.photorespiration.hydroxypyruvate reductase	pgsc0003dmp400013392	moderately similar to ( 371) AT1G79870 | Symbols: | oxidoreductase family protein | chr1:30044794-30045851 FORWARDvery weakly similar to (85.1) DHGY_CUCSA Glycerate dehydrogenase (EC 1.1.1.29) (NADH-dependent hydroxypyruvate reductase) (HPR) (GDH) - Cucumis sativus (Cucumber)moderately similar to ( 337) loc_os01g12830 12001.m43412 protein glyoxylate reductase, putative, expressedLdhA 2-Hacid_dh S…
CUST_27533_PI426222305	1.0353	4.97031	1.51021	7.17468	0.988042	4.95068	2.22999	70.5167	0.909631	5.07562	2.13852	33.2888	0.972442	5.18852	1.06267	5.23526	PGSC0003DMT400070896	Conserved gene of unknown function	chr04	Conserved gene of unknown function	PGSC0003DMP400047942	PGSC0003DMG401027564	PGSC0003DMC400047942	PGSC0003DMT400070896	1.1.6	PS.lightreaction.NADH DH	pgsc0003dmp400047942	moderately similar to ( 477) AT1G36320 | Symbols: | unknown protein | chr1:13671876-13673939 FORWARDmoderately similar to ( 300) loc_os01g20110 12001.m42980 protein expressed protein PGSC0003DMT400070896
CUST_32998_PI426222305	1.04032	4.42807	1.65821	7.68098	0.997307	4.56259	3.10333	166.019	0.932642	4.68103	2.88479	68.3105	0.959186	4.7154	1.04369	4.37355	PGSC0003DMT400019434	Glycolate oxidase	chr08	Glycolate oxidase	PGSC0003DMP400013302	PGSC0003DMG400007514	PGSC0003DMC400013302	PGSC0003DMT400019434	1.2.2	PS.photorespiration.glycolate oxydase	pgsc0003dmp400013302	highly similar to ( 632) AT4G18360 | Symbols: | (S)-2-hydroxy-acid oxidase, peroxisomal, putative / glycolate oxidase, putative / short chain alpha-hydroxy acid oxidase, putative | chr4:10146627-10148386 REVERSEhighly similar to ( 621) GOX_SPIOL Peroxisomal (S)-2-hydroxy-acid oxidase (EC 1.1.3.15) (Glycolate oxidase) (GOX) (Short chain alpha-hydroxy acid oxidase) - Spinacia oleracea (Spinach)high…	GO:0016020;GO:0005777;GO:0005634;GO:0005773;GO:0048046;GO:0009570;GO:0022626	GO:0010181;GO:0008891	GO:0055114;GO:0042742;GO:0050665;GO:0010204;GO:0000041;GO:0009854
CUST_51074_PI426222305	1.03299	3.97792	1.33226	5.73567	0.988359	4.09784	2.56932	64.7937	0.926071	4.21127	2.04452	26.5253	0.952427	4.35154	1.03633	3.92438	PGSC0003DMT400031009	Formyltetrahydrofolate deformylase	chr06	Formyltetrahydrofolate deformylase	PGSC0003DMP400021060	PGSC0003DMG401011882	PGSC0003DMC400021060	PGSC0003DMT400031009	1.2	PS.photorespiration	pgsc0003dmp400021060	moderately similar to ( 462) AT5G47435 | Symbols: | formyltetrahydrofolate deformylase, putative | chr5:19241779-19243424 FORWARDmoderately similar to ( 457) loc_os03g01222 12003.m35587 protein formyltetrahydrofolate deformylase, putative, expressedPurU purU PRK13011 purU purN PurN Formyl_trans_N PGSC0003DMT400031009
CUST_33012_PI426222305	1.04032	4.35145	1.25198	5.56645	0.995373	4.42801	3.27538	194.645	0.932642	4.5977	2.73897	58.8156	0.973881	4.68276	1.13312	4.9956	PGSC0003DMT400019435	Glycolate oxidase	chr08	Glycolate oxidase	PGSC0003DMP400013303	PGSC0003DMG400007514	PGSC0003DMC400013303	PGSC0003DMT400019435	1.2.2	PS.photorespiration.glycolate oxydase	pgsc0003dmp400013303	moderately similar to ( 313) AT4G18360 | Symbols: | (S)-2-hydroxy-acid oxidase, peroxisomal, putative / glycolate oxidase, putative / short chain alpha-hydroxy acid oxidase, putative | chr4:10146627-10148386 REVERSEmoderately similar to ( 302) GOX_SPIOL Peroxisomal (S)-2-hydroxy-acid oxidase (EC 1.1.3.15) (Glycolate oxidase) (GOX) (Short chain alpha-hydroxy acid oxidase) - Spinacia oleracea (Spin…
CUST_32989_PI426222305	0.974905	3.9137	1.3929	6.66108	1.0855	5.21938	3.45141	158.366	0.965489	4.90739	2.66939	65.4511	1.20823	6.98611	0.978061	3.86062	PGSC0003DMT400019433	Peroxisomal (S)-2-hydroxy-acid oxidase 2	chr08	Glycolate oxidase	PGSC0003DMP400013301	PGSC0003DMG400007514	PGSC0003DMC400013301	PGSC0003DMT400019433	1.2.2	PS.photorespiration.glycolate oxydase	pgsc0003dmp400013301	weakly similar to ( 178) AT3G14420 | Symbols: | (S)-2-hydroxy-acid oxidase, peroxisomal, putative / glycolate oxidase, putative / short chain alpha-hydroxy acid oxidase, putative | chr3:4821899-4823899 FORWARDweakly similar to ( 169) GOX_SPIOL Peroxisomal (S)-2-hydroxy-acid oxidase (EC 1.1.3.15) (Glycolate oxidase) (GOX) (Short chain alpha-hydroxy acid oxidase) - Spinacia oleracea (Spinach)weakly…
CUST_42404_PI426222305	1.01146	4.42076	1.55536	7.4365	0.967756	4.31917	3.36676	229.459	1.14676	6.36562	3.10045	91.0313	0.936267	4.71179	1.05244	5.08026	PGSC0003DMT400052875	H-Protein	chr08	H-Protein	PGSC0003DMP400035654	PGSC0003DMG400020515	PGSC0003DMC400035654	PGSC0003DMT400052875	1.2.4.4	PS.photorespiration.glycine cleavage.H protein	pgsc0003dmp400035654	moderately similar to ( 229) AT2G35370 | Symbols: GDCH | GDCH; glycine dehydrogenase (decarboxylating) | chr2:14891239-14892050 FORWARDmoderately similar to ( 245) GCSH_FLAPR Glycine cleavage system H protein, mitochondrial precursor - Flaveria pringleimoderately similar to ( 225) loc_os10g37180 12010.m06515 protein glycine cleavage system H protein, mitochondrial precursor, putative, expressedPR…
CUST_22329_PI426222305	1.05731	4.82301	1.39697	6.99055	0.925987	4.35191	2.83791	99.7047	1.29945	7.55468	3.11216	65.6108	0.892322	4.68293	1.07763	4.88173	PGSC0003DMT400039558	NAD(P)H-quinone oxidoreductase subunit 3, chloroplastic	chr03	NAD(P)H-quinone oxidoreductase subunit 3, chloroplastic	PGSC0003DMP400026822	PGSC0003DMG400015304	PGSC0003DMC400026822	PGSC0003DMT400039558	1.1.40	PS.lightreaction.cyclic electron flow-chlororespiration	pgsc0003dmp400026822	very weakly similar to (91.3) ATCG00440 | Symbols: NDHC | Encodes NADH dehydrogenase D3 subunit of the chloroplast NAD(P)H dehydrogenase complex | chrC:50001-50363 REVERSEvery weakly similar to (94.0) NU3C_LUPLU NAD(P)H-quinone oxidoreductase chain 3, chloroplast (EC 1.6.5.-) (NAD(P)H dehydrogenase, chain 3) (NADH-plastoquinone oxidoreductase chain 3) - Lupinus luteus (European yellow lupin)very …
CUST_19863_PI426222305	0.928528	60.6944	1.05248	64.5692	0.820468	56.3022	1.48715	226.209	0.90047	68.4886	1.61321	143.936	0.755576	53.5287	0.932611	61.3596	PGSC0003DMT400061157	Serine hydroxymethyltransferase	chr01	Serine hydroxymethyltransferase	PGSC0003DMP400041180	PGSC0003DMG400023799	PGSC0003DMC400041180	PGSC0003DMT400061157	1.2.5	PS.photorespiration.serine hydroxymethyltransferase	pgsc0003dmp400041180	highly similar to ( 790) AT1G36370 | Symbols: SHM7 | SHM7 (serine hydroxymethyltransferase 7); catalytic/ glycine hydroxymethyltransferase/ pyridoxal phosphate binding | chr1:13696240-13698576 REVERSEmoderately similar to ( 477) GLYM_SOLTU Serine hydroxymethyltransferase, mitochondrial precursor (EC 2.1.2.1) (Serine methylase) (Glycine hydroxymethyltransferase) (SHMT) - Solanum tuberosum (Potato)…	GO:0005759	GO:0030170;GO:0004372	GO:0046686;GO:0006544;GO:0006563;GO:0006730
CUST_27472_PI426222305	1.03299	3.94695	1.32312	5.39558	0.988359	4.03449	2.00205	47.293	0.962598	4.66508	2.34306	38.3523	0.952427	4.29638	1.03633	3.90849	PGSC0003DMT400070892	Conserved gene of unknown function	chr04	Conserved gene of unknown function	PGSC0003DMP400047938	PGSC0003DMG401027564	PGSC0003DMC400047938	PGSC0003DMT400070892	1.1.6	PS.lightreaction.NADH DH	pgsc0003dmp400047938	moderately similar to ( 473) AT1G36320 | Symbols: | unknown protein | chr1:13671876-13673939 FORWARDmoderately similar to ( 297) loc_os01g20110 12001.m42980 protein expressed protein PGSC0003DMT400070892
CUST_9590_PI426222305	0.995333	3.91797	1.10377	4.66102	1.07296	5.39539	2.29603	58.8218	1.21083	6.81077	3.11454	52.027	0.917708	4.31983	0.998555	3.82914	PGSC0003DMT400058960	(S)-2-hydroxy-acid oxidase	chr03	(S)-2-hydroxy-acid oxidase	PGSC0003DMP400039724	PGSC0003DMG401022901	PGSC0003DMC400039724	PGSC0003DMT400058960	1.2.2	PS.photorespiration.glycolate oxydase	pgsc0003dmp400039724	highly similar to ( 529) AT3G14130 | Symbols: | (S)-2-hydroxy-acid oxidase, peroxisomal, putative / glycolate oxidase, putative / short chain alpha-hydroxy acid oxidase, putative | chr3:4685844-4687852 REVERSEmoderately similar to ( 416) GOX_SPIOL Peroxisomal (S)-2-hydroxy-acid oxidase (EC 1.1.3.15) (Glycolate oxidase) (GOX) (Short chain alpha-hydroxy acid oxidase) - Spinacia oleracea (Spinach)mo…	GO:0005777	GO:0010181;GO:0008891;GO:0018580;GO:0015930	GO:0055114;GO:0042742;GO:0050665;GO:0010204;GO:0009854;GO:0006537
CUST_15474_PI426222305	1.03299	4.68043	1.14568	4.80161	1.25111	6.62864	2.17641	60.585	1.13554	6.33914	2.30698	37.2805	0.965485	4.96426	1.03633	4.73142	PGSC0003DMT400073693	Chloroplast post-illumination chlorophyll fluorescence increase protein	chr12	Chloroplast post-illumination chlorophyll fluorescence increase protein	PGSC0003DMP400049872	PGSC0003DMG402028626	PGSC0003DMC400049872	PGSC0003DMT400073693	1.1.40	PS.lightreaction.cyclic electron flow-chlororespiration	pgsc0003dmp400049872	moderately similar to ( 310) AT3G15840 | Symbols: PIFI | PIFI (post-illumination chlorophyll fluorescence increase) | chr3:5356782-5358070 REVERSEmoderately similar to ( 256) loc_os03g38950 12003.m35300 protein expressed protein PGSC0003DMT400073693
CUST_706_PI426222305	1.04032	3.97187	1.12544	4.11768	0.995373	4.06831	2.12286	54.8	0.932642	4.17764	2.27161	34.5477	0.959186	4.38109	1.04369	3.93306	PGSC0003DMT400041084	Conserved gene of unknown function	chr05	Conserved gene of unknown function	PGSC0003DMP400027858	PGSC0003DMG400015900	PGSC0003DMC400027858	PGSC0003DMT400041084	1.1.6	PS.lightreaction.NADH DH	pgsc0003dmp400027858	weakly similar to ( 179) AT1G70760 | Symbols: CRR23 | CRR23 ((chlororespiratory reduction 23) | chr1:26687267-26688201 FORWARDweakly similar to ( 119) loc_os05g28090 12005.m07096 protein expressed protein PGSC0003DMT400041084
CUST_40381_PI426222305	0.973659	4.83301	1.10608	5.25323	1.02312	5.53441	2.49972	78.3898	0.960073	5.56791	3.0013	28.1336	1.11465	6.42195	1.0148	5.08951	PGSC0003DMT400061613	Ferredoxin-3, chloroplast	chr11	Ferredoxin-3, chloroplast	PGSC0003DMP400041457	PGSC0003DMG400023985	PGSC0003DMC400041457	PGSC0003DMT400061613	1.1.5.2	PS.lightreaction.other electron carrier (ox/red).ferredoxin	pgsc0003dmp400041457	weakly similar to ( 154) AT2G27510 | Symbols: ATFD3 | ATFD3 (ferredoxin 3); 2 iron, 2 sulfur cluster binding / electron carrier/ iron-sulfur cluster binding | chr2:11758281-11758748 REVERSEweakly similar to ( 149) FER2_RAPSA Ferredoxin, root R-B2 - Raphanus sativus (Radish)weakly similar to ( 161) loc_os01g64120 12001.m12527 protein ferredoxin-6, chloroplast precursor, putative, expressedpetF fer…		GO:0046872;GO:0009055;GO:0051537	GO:0022900
CUST_51068_PI426222305	1.02915	4.45661	1.1619	4.92386	1.29106	7.0562	2.24349	66.5095	0.942613	4.92781	2.18676	32.5514	1.00542	5.28016	1.03441	4.52259	PGSC0003DMT400031010	Formyltetrahydrofolate deformylase	chr06	Formyltetrahydrofolate deformylase	PGSC0003DMP400021061	PGSC0003DMG401011882	PGSC0003DMC400021061	PGSC0003DMT400031010	1.2	PS.photorespiration	pgsc0003dmp400021061	moderately similar to ( 361) AT5G47435 | Symbols: | formyltetrahydrofolate deformylase, putative | chr5:19241779-19243424 FORWARDmoderately similar to ( 360) loc_os03g01222 12003.m35587 protein formyltetrahydrofolate deformylase, putative, expressedPurU purU PRK13011 purU purN PurN Formyl_trans_N PGSC0003DMT400031010
CUST_46626_PI426222305	1.0085	5.31558	1.13287	5.44488	1.16401	6.63857	2.4629	53.1176	0.937165	5.52834	2.43505	51.3126	1.02198	5.84006	0.964384	4.88812	PGSC0003DMT400027015	2-oxo acid dehydrogenase, lipoyl-binding site	chr02	2-oxo acid dehydrogenase, lipoyl-binding site	PGSC0003DMP400018422	PGSC0003DMG401010423	PGSC0003DMC400018422	PGSC0003DMT400027015	1.2.4.4	PS.photorespiration.glycine cleavage.H protein	pgsc0003dmp400018422	moderately similar to ( 208) AT2G35120 | Symbols: | glycine cleavage system H protein, mitochondrial, putative | chr2:14805913-14807274 REVERSEweakly similar to ( 178) GCSH_ORYSA Glycine cleavage system H protein, mitochondrial precursor - Oryza sativa (Rice)moderately similar to ( 203) loc_os06g45670 12006.m09095 protein glycine cleavage system H protein 1, mitochondrial precursor, putative, exp…
CUST_35774_PI426222305	1.41151	7.29541	1.35935	6.08492	0.974441	4.18494	2.45142	62.6069	1.0733	5.77621	1.82168	20.2926	0.977362	4.88466	1.02174	3.96388	PGSC0003DMT400047054	NADPH:adrenodoxin oxidoreductase, mitochondrial	chr01	NADPH:adrenodoxin oxidoreductase, mitochondrial	PGSC0003DMP400031828	PGSC0003DMG400018273	PGSC0003DMC400031828	PGSC0003DMT400047054	1.1.5.3	PS.lightreaction.other electron carrier (ox/red).ferredoxin reductase	pgsc0003dmp400031828	moderately similar to ( 204) AT4G32360 | Symbols: | NADP adrenodoxin-like ferredoxin reductase | chr4:15621550-15624711 FORWARDmoderately similar to ( 208) loc_os02g17700 12002.m07013 protein NADPH adrenodoxin oxidoreductase, mitochondrial precursor, putative, expressed PGSC0003DMT400047054
CUST_33635_PI426222305	1.30748	7.11944	1.12817	5.23559	0.962124	5.14947	1.80884	41.6001	0.927539	5.31759	2.04875	30.9428	1.00737	5.63413	1.1784	6.27032	PGSC0003DMT400078669	Endoribonuclease E	chr02	Endoribonuclease E	PGSC0003DMP400053313	PGSC0003DMG400030614	PGSC0003DMC400053313	PGSC0003DMT400078669	1.1.6	PS.lightreaction.NADH DH	pgsc0003dmp400053313	weakly similar to ( 169) AT4G37920 | Symbols: | unknown protein | chr4:17828538-17830317 REVERSEweakly similar to ( 162) loc_os08g23160 12008.m06337 protein conserved hypothetical protein PGSC0003DMT400078669
CUST_28743_PI426222305	1.30126	6.50097	1.08229	4.3297	0.957207	4.31615	2.00154	48.0588	0.915112	4.61748	2.29011	39.7035	0.940533	4.89319	1.10536	5.218	PGSC0003DMT400083104	Conserved gene of unknown function	chr06	Conserved gene of unknown function	PGSC0003DMP400055817	PGSC0003DMG400033055	PGSC0003DMC400055817	PGSC0003DMT400083104	1.1.5.2	PS.lightreaction.other electron carrier (ox/red).ferredoxin	pgsc0003dmp400055817	moderately similar to ( 217) AT5G07950 | Symbols: | unknown protein | chr5:2540530-2542047 REVERSEweakly similar to ( 141) loc_os03g11450 12003.m06596 protein expressed protein PGSC0003DMT400083104
CUST_30220_PI426222305	1.27665	6.98489	1.12715	5.24081	0.960422	5.13293	1.75679	39.1127	1.06859	6.226	1.78067	21.7572	0.998955	5.58426	0.979878	4.8368	PGSC0003DMT400012299	Formyltetrahydrofolate deformylase	chr08	Formyltetrahydrofolate deformylase	PGSC0003DMP400008548	PGSC0003DMG401004821	PGSC0003DMC400008548	PGSC0003DMT400012299	1.2	PS.photorespiration	pgsc0003dmp400008548	weakly similar to ( 200) AT4G17360 | Symbols: | formyltetrahydrofolate deformylase/ hydroxymethyl-, formyl- and related transferase/ methyltransferase | chr4:9703698-9705468 REVERSEweakly similar to ( 188) loc_os03g01222 12003.m35587 protein formyltetrahydrofolate deformylase, putative, expressedPurU purU PRK13011 purU purN PurN Formyl_trans_N PGSC0003DMT400012299
CUST_9452_PI426222305	1.33964	7.20956	2.36704	14.4126	1.15316	5.73293	3.64156	250.822	0.87889	4.47278	2.92979	84.4879	0.903904	4.59532	0.983536	4.075	PGSC0003DMT400058950	Glycolate oxidase	chr03	Glycolate oxidase	PGSC0003DMP400039716	PGSC0003DMG402022901	PGSC0003DMC400039716	PGSC0003DMT400058950	1.2.2	PS.photorespiration.glycolate oxydase	pgsc0003dmp400039716	moderately similar to ( 461) AT3G14150 | Symbols: | (S)-2-hydroxy-acid oxidase, peroxisomal, putative / glycolate oxidase, putative / short chain alpha-hydroxy acid oxidase, putative | chr3:4690667-4692679 REVERSEmoderately similar to ( 366) GOX_SPIOL Peroxisomal (S)-2-hydroxy-acid oxidase (EC 1.1.3.15) (Glycolate oxidase) (GOX) (Short chain alpha-hydroxy acid oxidase) - Spinacia oleracea (Spinac…	GO:0005777	GO:0010181;GO:0008891;GO:0018580	GO:0055114;GO:0042742;GO:0050665;GO:0010204;GO:0009854
CUST_11513_PI426222305	1.0993	26.6232	1.78174	42.7252	0.963593	21.8364	2.28194	330.215	0.929944	24.5094	2.11108	168.194	0.739281	17.9668	0.72016	16.2418	PGSC0003DMT400074606	NAD(P)H-quinone oxidoreductase subunit 5, chloroplastic	chr09	NAD(P)H-quinone oxidoreductase subunit 5, chloroplastic	PGSC0003DMP400050537	PGSC0003DMG400029008	PGSC0003DMC400050537	PGSC0003DMT400074606	1.1.40	PS.lightreaction.cyclic electron flow-chlororespiration	pgsc0003dmp400050537	highly similar to ( 770) ATCG01010 | Symbols: NDHF | Chloroplast encoded NADH dehydrogenase unit. | chrC:110398-112638 REVERSEnearly identical (1049) NU5C_TOBAC NAD(P)H-quinone oxidoreductase chain 5, chloroplast (EC 1.6.5.-) (NAD(P)H dehydrogenase, chain 5) (NADH-plastoquinone oxidoreductase chain 5) - Nicotiana tabacum (Common tobacco)highly similar to ( 673) loc_osp1g00880 11562.m00079 protein…	GO:0016021;GO:0009535	GO:0008137;GO:0048038	GO:0006810;GO:0042773
CUST_28700_PI426222305	1.08273	21.87	1.15416	21.3132	1.05662	21.8683	1.58909	161.951	0.745483	17.6967	1.77422	73.5086	0.871792	18.9676	0.709791	14.7013	PGSC0003DMT400083106	Conserved gene of unknown function	chr06	Conserved gene of unknown function	PGSC0003DMP400055819	PGSC0003DMG400033055	PGSC0003DMC400055819	PGSC0003DMT400083106	1.1.5.2	PS.lightreaction.other electron carrier (ox/red).ferredoxin	pgsc0003dmp400055819	weakly similar to ( 147) AT5G07950 | Symbols: | unknown protein | chr5:2540530-2542047 REVERSEweakly similar to ( 101) loc_os03g11450 12003.m06596 protein expressed protein PGSC0003DMT400083106
CUST_46474_PI426222305	0.454907	8.28218	1.04326	17.4527	0.844841	15.8328	3.03511	150.772	1.33882	26.8314	1.63522	58.8005	0.366458	7.47124	0.88102	16.2782	PGSC0003DMT400016362	Serine hydroxymethyltransferase	chr04	Serine hydroxymethyltransferase	PGSC0003DMP400011345	PGSC0003DMG400006396	PGSC0003DMC400011345	PGSC0003DMT400016362	1.2.5	PS.photorespiration.serine hydroxymethyltransferase	pgsc0003dmp400011345	highly similar to ( 843) AT5G26780 | Symbols: SHM2 | SHM2 (SERINE HYDROXYMETHYLTRANSFERASE 2); catalytic/ glycine hydroxymethyltransferase/ pyridoxal phosphate binding | chr5:9418299-9421725 FORWARDhighly similar to ( 853) GLYM_PEA Serine hydroxymethyltransferase, mitochondrial precursor (EC 2.1.2.1) (Serine methylase) (Glycine hydroxymethyltransferase) (SHMT) - Pisum sativum (Garden pea)highly s…
CUST_37220_PI426222305	0.989568	6.70186	2.09586	13.0349	0.896159	6.52057	2.94349	127.342	1.47407	12.911	2.40435	66.1839	0.740095	5.37595	0.843381	5.61077	PGSC0003DMT400019586	Hydroxyphenylpyruvate reductase (HPPR)	chr12	Hydroxyphenylpyruvate reductase (HPPR)	PGSC0003DMP400013394	PGSC0003DMG400007573	PGSC0003DMC400013394	PGSC0003DMT400019586	1.2.6	PS.photorespiration.hydroxypyruvate reductase	pgsc0003dmp400013394	moderately similar to ( 437) AT1G79870 | Symbols: | oxidoreductase family protein | chr1:30044794-30045851 FORWARDvery weakly similar to (94.4) DHGY_CUCSA Glycerate dehydrogenase (EC 1.1.1.29) (NADH-dependent hydroxypyruvate reductase) (HPR) (GDH) - Cucumis sativus (Cucumber)moderately similar to ( 409) loc_os01g12830 12001.m43412 protein glyoxylate reductase, putative, expressedLdhA 2-Hacid_dh S…
CUST_14815_PI426222305	0.744041	11.5128	0.905584	13.6534	0.601482	9.81927	2.44816	84.9483	1.10774	17.9718	2.4226	81.9899	0.379364	5.9667	0.670518	10.5715	PGSC0003DMT400016910	Serine/threonine protein kinase	chr12	Serine/threonine protein kinase	PGSC0003DMP400011689	PGSC0003DMG400006613	PGSC0003DMC400011689	PGSC0003DMT400016910	1.1.30	PS.lightreaction.state transition	pgsc0003dmp400011689	moderately similar to ( 449) AT1G68830 | Symbols: STN7 | STN7 (Stt7 homolog STN7); kinase/ protein kinase | chr1:25872654-25875473 REVERSEmoderately similar to ( 217) STT7_CHLRE Serine/threonine-protein kinase stt7, chloroplast precursor (EC 2.7.11.1) - Chlamydomonas reinhardtiimoderately similar to ( 407) loc_os05g47560 12005.m08829 protein serine/threonine-protein kinase SNT7, chloroplast precu…
CUST_14799_PI426222305	0.681387	14.4271	1.53206	27.3835	0.617515	12.5536	3.16712	220.152	1.45499	29.4618	2.40516	133.986	0.313578	6.19202	0.626945	12.8764	PGSC0003DMT400016911	Serine/threonine protein kinase	chr12	Serine/threonine protein kinase	PGSC0003DMP400011690	PGSC0003DMG400006613	PGSC0003DMC400011690	PGSC0003DMT400016911	1.1.30	PS.lightreaction.state transition	pgsc0003dmp400011690	highly similar to ( 830) AT1G68830 | Symbols: STN7 | STN7 (Stt7 homolog STN7); kinase/ protein kinase | chr1:25872654-25875473 REVERSEmoderately similar to ( 323) STT7_CHLRE Serine/threonine-protein kinase stt7, chloroplast precursor (EC 2.7.11.1) - Chlamydomonas reinhardtiihighly similar to ( 768) loc_os05g47560 12005.m08829 protein serine/threonine-protein kinase SNT7, chloroplast precursor, pu…
CUST_14778_PI426222305	0.705623	16.451	1.08813	23.366	0.506564	11.9537	2.34504	122.988	1.41679	32.7439	1.71987	93.3603	0.33199	7.55471	0.754637	16.3803	PGSC0003DMT400016909	Serine/threonine protein kinase	chr12	Serine/threonine protein kinase	PGSC0003DMP400011688	PGSC0003DMG400006613	PGSC0003DMC400011688	PGSC0003DMT400016909	1.1.30	PS.lightreaction.state transition	pgsc0003dmp400011688	highly similar to ( 646) AT1G68830 | Symbols: STN7 | STN7 (Stt7 homolog STN7); kinase/ protein kinase | chr1:25872654-25875473 REVERSEmoderately similar to ( 244) STT7_CHLRE Serine/threonine-protein kinase stt7, chloroplast precursor (EC 2.7.11.1) - Chlamydomonas reinhardtiihighly similar to ( 614) loc_os05g47560 12005.m08829 protein serine/threonine-protein kinase SNT7, chloroplast precursor, pu…
CUST_28111_PI426222305	0.640744	14.7644	0.964464	25.0663	0.471816	11.877	2.79916	324.239	1.25432	30.4034	3.19468	205.034	0.599583	16.3359	0.863342	18.9176	PGSC0003DMT400004239	Conserved gene of unknown function	chr01	Ferredoxin	PGSC0003DMP400003028	PGSC0003DMG400001687	PGSC0003DMC400003028	PGSC0003DMT400004239	1.1.5.2	PS.lightreaction.other electron carrier (ox/red).ferredoxin	pgsc0003dmp400003028	moderately similar to ( 225) AT1G02180 | Symbols: | ferredoxin-related | chr1:413619-414505 REVERSEweakly similar to ( 162) loc_os02g58740 12002.m10894 protein expressed protein PGSC0003DMT400004239
CUST_37598_PI426222305	0.625967	6.00565	0.764494	7.04697	0.947643	10.4899	1.86821	48.734	0.908325	10.1341	1.34924	22.2074	0.80594	8.78054	1.17041	14.2583	PGSC0003DMT400049626	Conserved gene of unknown function	chr07	Conserved gene of unknown function	PGSC0003DMP400033497	PGSC0003DMG400019277	PGSC0003DMC400033497	PGSC0003DMT400049626	1.1.5.2	PS.lightreaction.other electron carrier (ox/red).ferredoxin	pgsc0003dmp400033497	weakly similar to ( 119) loc_os08g35710 12008.m07560 protein expressed protein PGSC0003DMT400049626
CUST_30202_PI426222305	1.05624	52.4814	1.07291	49.2361	1.14353	58.7806	1.12243	114.729	0.827514	45.3181	1.2873	83.3558	0.809826	43.6921	1.01012	52.0052	PGSC0003DMT400012297	Formyltetrahydrofolate deformylase	chr08	Formyltetrahydrofolate deformylase	PGSC0003DMP400008547	PGSC0003DMG401004821	PGSC0003DMC400008547	PGSC0003DMT400012297	1.2	PS.photorespiration	pgsc0003dmp400008547	moderately similar to ( 399) AT4G17360 | Symbols: | formyltetrahydrofolate deformylase/ hydroxymethyl-, formyl- and related transferase/ methyltransferase | chr4:9703698-9705468 REVERSEmoderately similar to ( 360) loc_os03g01222 12003.m35587 protein formyltetrahydrofolate deformylase, putative, expressedpurU PurU PRK13011 purU PurN purN Formyl_trans_N PGSC0003DMT400012297
CUST_14804_PI426222305	1.04544	22.4201	1.36509	27.5934	0.841963	19.0512	1.24762	59.5015	0.849615	21.7938	1.84383	57.0315	0.403379	9.91323	0.788817	18.8169	PGSC0003DMT400016913	Serine/threonine protein kinase	chr12	Serine/threonine protein kinase	PGSC0003DMP400011692	PGSC0003DMG400006613	PGSC0003DMC400011692	PGSC0003DMT400016913	1.1.30	PS.lightreaction.state transition	pgsc0003dmp400011692	moderately similar to ( 373) AT1G68830 | Symbols: STN7 | STN7 (Stt7 homolog STN7); kinase/ protein kinase | chr1:25872654-25875473 REVERSEweakly similar to ( 102) STT7_CHLRE Serine/threonine-protein kinase stt7, chloroplast precursor (EC 2.7.11.1) - Chlamydomonas reinhardtiimoderately similar to ( 353) loc_os05g47560 12005.m08829 protein serine/threonine-protein kinase SNT7, chloroplast precursor…
CUST_28741_PI426222305	0.829435	5.9102	1.81446	12.6759	0.945368	7.37936	1.20952	36.3887	0.68156	5.55972	2.875	35.1012	0.888274	7.21199	0.953842	7.43217	PGSC0003DMT400083103	Conserved gene of unknown function	chr06	Conserved gene of unknown function	PGSC0003DMP400055816	PGSC0003DMG400033055	PGSC0003DMC400055816	PGSC0003DMT400083103	1.1.5.2	PS.lightreaction.other electron carrier (ox/red).ferredoxin	pgsc0003dmp400055816	weakly similar to ( 157) AT5G07950 | Symbols: | unknown protein | chr5:2540530-2542047 REVERSEweakly similar to ( 112) loc_os03g11450 12003.m06596 protein expressed protein PGSC0003DMT400083103
CUST_9238_PI426222305	0.92688	327.202	1.22939	402.242	1.00013	367.46	1.21946	788.561	0.962742	377.983	0.926467	407.222	0.895177	347.774	0.993709	357.162	PGSC0003DMT400058949	(S)-2-hydroxy-acid oxidase	chr03	(S)-2-hydroxy-acid oxidase	PGSC0003DMP400039715	PGSC0003DMG401022901	PGSC0003DMC400039715	PGSC0003DMT400058949	1.2.2	PS.photorespiration.glycolate oxydase	pgsc0003dmp400039715	moderately similar to ( 468) AT3G14150 | Symbols: | (S)-2-hydroxy-acid oxidase, peroxisomal, putative / glycolate oxidase, putative / short chain alpha-hydroxy acid oxidase, putative | chr3:4690667-4692679 REVERSEmoderately similar to ( 374) GOX_SPIOL Peroxisomal (S)-2-hydroxy-acid oxidase (EC 1.1.3.15) (Glycolate oxidase) (GOX) (Short chain alpha-hydroxy acid oxidase) - Spinacia oleracea (Spinac…		GO:0016491	GO:0055114
CUST_27068_PI426222305	0.917664	122.125	1.36081	169.142	1.03077	143.272	1.03401	221.302	0.978717	145.398	0.960985	157.917	1.09767	162.498	1.30091	176.985	PGSC0003DMT400026391	TPR domain containing protein	chr03	TPR domain containing protein	PGSC0003DMP400018020	PGSC0003DMG400010180	PGSC0003DMC400018020	PGSC0003DMT400026391	1.1.5.2	PS.lightreaction.other electron carrier (ox/red).ferredoxin	pgsc0003dmp400018020	weakly similar to ( 108) AT3G17670 | Symbols: | binding | chr3:6040857-6042012 FORWARDvery weakly similar to (99.8) loc_os04g57780 12004.m10663 protein TPR domain containing protein, putative, expressed PGSC0003DMT400026391
CUST_42920_PI426222305	1.18023	146.928	1.26389	144.659	0.887806	116.465	1.06583	233.154	0.817087	112.568	0.998658	152.789	0.990735	135.121	0.818656	101.559	PGSC0003DMT400058440	Phytochromobilin synthase	chr01	Phytochromobilin synthase	PGSC0003DMP400039347	PGSC0003DMG401022694	PGSC0003DMC400039347	PGSC0003DMT400058440	1.1.5.4	PS.lightreaction.other electron carrier (ox/red).ferredoxin oxireductase	pgsc0003dmp400039347	moderately similar to ( 362) AT3G09150 | Symbols: HY2, GUN3 | HY2 (ELONGATED HYPOCOTYL 2); phytochromobilin:ferredoxin oxidoreductase | chr3:2803665-2805333 FORWARDmoderately similar to ( 355) loc_os01g72090 12001.m42525 protein phycoerythrobilin ferredoxin oxidoreductase, putative, expressedFe_bilin_red PGSC0003DMT400058440
CUST_42916_PI426222305	1.16209	143.345	1.38757	157.856	1.0025	129.653	0.974973	202.433	0.837548	116.215	1.05302	158.507	0.807959	115.757	0.86822	107.496	PGSC0003DMT400058438	Phytochromobilin synthase	chr01	Phytochromobilin synthase	PGSC0003DMP400039345	PGSC0003DMG401022694	PGSC0003DMC400039345	PGSC0003DMT400058438	1.1.5.4	PS.lightreaction.other electron carrier (ox/red).ferredoxin oxireductase	pgsc0003dmp400039345	weakly similar to ( 155) AT3G09150 | Symbols: HY2, GUN3 | HY2 (ELONGATED HYPOCOTYL 2); phytochromobilin:ferredoxin oxidoreductase | chr3:2803665-2805333 FORWARDweakly similar to ( 154) loc_os01g72090 12001.m42525 protein phycoerythrobilin ferredoxin oxidoreductase, putative, expressedFe_bilin_red PGSC0003DMT400058438
CUST_42876_PI426222305	1.17696	142.543	1.41038	157.291	0.987123	124.988	1.02175	214.844	0.899702	121.089	1.12011	166.395	0.788286	107.872	0.871718	105.202	PGSC0003DMT400058439	Phytochromobilin synthase	chr01	Phytochromobilin synthase	PGSC0003DMP400039346	PGSC0003DMG401022694	PGSC0003DMC400039346	PGSC0003DMT400058439	1.1.5.4	PS.lightreaction.other electron carrier (ox/red).ferredoxin oxireductase	pgsc0003dmp400039346	moderately similar to ( 228) AT3G09150 | Symbols: HY2, GUN3 | HY2 (ELONGATED HYPOCOTYL 2); phytochromobilin:ferredoxin oxidoreductase | chr3:2803665-2805333 FORWARDmoderately similar to ( 228) loc_os01g72090 12001.m42525 protein phycoerythrobilin ferredoxin oxidoreductase, putative, expressedFe_bilin_red PGSC0003DMT400058439
CUST_42884_PI426222305	1.08476	143.734	1.33644	161.76	0.89276	123.655	1.01468	216.975	0.775496	113.376	0.999603	160.399	0.802784	118.891	0.921625	120.93	PGSC0003DMT400058437	Phytochromobilin synthase	chr01	Phytochromobilin synthase	PGSC0003DMP400039344	PGSC0003DMG401022694	PGSC0003DMC400039344	PGSC0003DMT400058437	1.1.5.4	PS.lightreaction.other electron carrier (ox/red).ferredoxin oxireductase	pgsc0003dmp400039344	moderately similar to ( 379) AT3G09150 | Symbols: HY2, GUN3 | HY2 (ELONGATED HYPOCOTYL 2); phytochromobilin:ferredoxin oxidoreductase | chr3:2803665-2805333 FORWARDmoderately similar to ( 374) loc_os01g72090 12001.m42525 protein phycoerythrobilin ferredoxin oxidoreductase, putative, expressedFe_bilin_red PGSC0003DMT400058437
CUST_8553_PI426222305	0.980371	1287.43	1.24147	1535.31	0.978675	1340.82	0.789484	1606.05	1.04818	1533.15	0.915438	1493.02	1.02936	1466.39	1.21877	1614.29	PGSC0003DMT400029489	NAD(P)H-quinone oxidoreductase subunit I, chloroplastic	chr01	NADH-plastoquinone oxidoreductase subunit 4	PGSC0003DMP400020075	PGSC0003DMG401011339	PGSC0003DMC400020075	PGSC0003DMT400029489	1.1.40	PS.lightreaction.cyclic electron flow-chlororespiration	pgsc0003dmp400020075	moderately similar to ( 324) ATCG01090 | Symbols: NDHI | Encodes subunit of the chloroplast NAD(P)H dehydrogenase complex | chrC:119244-119762 REVERSEmoderately similar to ( 341) NDHI_SOLTU NAD(P)H-quinone oxidoreductase subunit I, chloroplast (EC 1.6.5.-) (NAD(P)H dehydrogenase subunit I) (NDH subunit I) (NADH-plastoquinone oxidoreductase subunit I) - Solanum tuberosum (Potato)moderately similar…
CUST_8458_PI426222305	1.00902	1142.75	1.11519	1170.27	1.00269	1177.29	0.755791	1358.63	0.928513	1180.43	0.868843	1221.69	1.04375	1273.23	1.12082	1280	PGSC0003DMT400029490	NAD(P)H-quinone oxidoreductase subunit 4L, chloroplastic	chr01	NAD(P)H-quinone oxidoreductase subunit 4L, chloroplastic	PGSC0003DMP400020076	PGSC0003DMG402011339	PGSC0003DMC400020076	PGSC0003DMT400029490	1.1.40	PS.lightreaction.cyclic electron flow-chlororespiration	pgsc0003dmp400020076	weakly similar to ( 110) ATCG01070 | Symbols: NDHE | NADH dehydrogenase ND4L | chrC:117804-118109 REVERSEweakly similar to ( 120) NU4LC_TOBAC NAD(P)H-quinone oxidoreductase chain 4L, chloroplast (EC 1.6.5.-) (NAD(P)H dehydrogenase, chain 4L) (NADH-plastoquinone oxidoreductase chain 4L) - Nicotiana tabacum (Common tobacco)weakly similar to ( 104) loc_osp1g00930 11562.m00084 protein NADH dehydrogen…
CUST_7345_PI426222305	0.928185	137.764	1.08492	149.652	0.93388	145.788	0.69201	161.609	0.878483	146.262	0.801343	150.513	1.05644	168.478	1.102	162.747	PGSC0003DMT400052919	NAD(P)H-quinone oxidoreductase subunit 5, chloroplastic	chr12	NAD(P)H-quinone oxidoreductase subunit 5, chloroplastic	PGSC0003DMP400035685	PGSC0003DMG400020529	PGSC0003DMC400035685	PGSC0003DMT400052919	1.1.40	PS.lightreaction.cyclic electron flow-chlororespiration	pgsc0003dmp400035685	weakly similar to ( 177) ATCG01010 | Symbols: NDHF | Chloroplast encoded NADH dehydrogenase unit. | chrC:110398-112638 REVERSEmoderately similar to ( 211) NU5C_ATRBE NAD(P)H-quinone oxidoreductase chain 5, chloroplast (EC 1.6.5.-) (NAD(P)H dehydrogenase, chain 5) (NADH-plastoquinone oxidoreductase chain 5) - Atropa belladonna (Belladonna) (Deadly nightshade)weakly similar to ( 171) loc_osp1g00880…
CUST_38093_PI426222305	1.20621	5198.83	1.48976	6121.28	1.25893	5738.23	0.391924	2630.48	0.746517	3617.7	0.425305	2292.52	1.12659	5581.29	1.08386	4679.6	PGSC0003DMT400054730	Glycolate oxidase	chr10	Glycolate oxidase	PGSC0003DMP400036811	PGSC0003DMG400021248	PGSC0003DMC400036811	PGSC0003DMT400054730	1.2.2	PS.photorespiration.glycolate oxydase	pgsc0003dmp400036811	highly similar to ( 632) AT3G14420 | Symbols: | (S)-2-hydroxy-acid oxidase, peroxisomal, putative / glycolate oxidase, putative / short chain alpha-hydroxy acid oxidase, putative | chr3:4821899-4823899 FORWARDhighly similar to ( 628) GOX_SPIOL Peroxisomal (S)-2-hydroxy-acid oxidase (EC 1.1.3.15) (Glycolate oxidase) (GOX) (Short chain alpha-hydroxy acid oxidase) - Spinacia oleracea (Spinach)highly…	GO:0016020;GO:0005777;GO:0005634;GO:0005773;GO:0048046;GO:0009570;GO:0022626	GO:0010181;GO:0008891;GO:0018580	GO:0055114;GO:0042742;GO:0050665;GO:0010204;GO:0009854
CUST_8537_PI426222305	1.05659	95.5066	1.04037	87.3196	1.08007	102.172	0.561649	80.8376	0.920628	93.0341	1.0359	114.477	1.08424	106.181	0.953597	86.9013	PGSC0003DMT400029491	NADH-plastoquinone oxidoreductase subunit 4	chr01	NADH-plastoquinone oxidoreductase subunit 4	PGSC0003DMP400020077	PGSC0003DMG401011339	PGSC0003DMC400020077	PGSC0003DMT400029491	1.1.6	PS.lightreaction.NADH DH	pgsc0003dmp400020077	highly similar to ( 523) ATCG01050 | Symbols: NDHD | Represents a plastid-encoded subunit of a NAD(P)H dehydrogenase complex. Its mRNA is edited at four positions. Translation data is not available for this gene. | chrC:115665-117185 REVERSEhighly similar to ( 624) NU4C_TOBAC NAD(P)H-quinone oxidoreductase chain 4, chloroplast (EC 1.6.5.-) (NAD(P)H dehydrogenase, chain 4) (NADH-plastoquinone oxid…
CUST_7339_PI426222305	1.1103	205.898	1.07939	187.714	1.04579	204.36	0.612324	191.525	0.78086	166.924	0.998439	227.562	0.976783	197.119	0.928056	179.477	PGSC0003DMT400052934	NADH-plastoquinone oxidoreductase subunit 4	chr12	NADH-plastoquinone oxidoreductase subunit 4	PGSC0003DMP400035691	PGSC0003DMG400020539	PGSC0003DMC400035691	PGSC0003DMT400052934	1.1.6	PS.lightreaction.NADH DH	pgsc0003dmp400035691	moderately similar to ( 318) ATCG01050 | Symbols: NDHD | Represents a plastid-encoded subunit of a NAD(P)H dehydrogenase complex. Its mRNA is edited at four positions. Translation data is not available for this gene. | chrC:115665-117185 REVERSEmoderately similar to ( 403) NU4C_TOBAC NAD(P)H-quinone oxidoreductase chain 4, chloroplast (EC 1.6.5.-) (NAD(P)H dehydrogenase, chain 4) (NADH-plastoquin…
CUST_48298_PI426222305	1.13821	5119.39	1.13098	4677.15	1.15893	5440.82	0.702624	5266.81	0.5571	2828.49	0.764022	4391.48	0.967751	4703.99	1.16696	5368.47	PGSC0003DMT400002438	NADH dehydrogenase subunit 5	chr07	NADH dehydrogenase subunit 5	PGSC0003DMP400001769	PGSC0003DMG400000928	PGSC0003DMC400001769	PGSC0003DMT400002438	1.1.40	PS.lightreaction.cyclic electron flow-chlororespiration	pgsc0003dmp400001769	moderately similar to ( 253) ATMG00665 | Symbols: NAD5B, NAD5.2, NAD5 | Mitochondrial NADH dehydrogenase subunit 5. The gene is trans-spliced from three different pre-cursors, NAD5a, NAD5b and NAD5c. | chrM:190740-190761 REVERSEmoderately similar to ( 258) NU5M_OENBE NADH-ubiquinone oxidoreductase chain 5 (EC 1.6.5.3) (NADH dehydrogenase subunit 5) - Oenothera bertiana (Bertero's evening primrose…	GO:0016021;GO:0005743	GO:0008137	GO:0042773
CUST_37939_PI426222305	1.1471	475.166	1.08299	410.469	1.09715	471.34	0.84872	638.367	0.769593	357.104	0.955038	478.199	1.06714	472.533	1.08093	442.628	PGSC0003DMT400079469	NADH-ubiquinone oxidoreductase 49 kDa subunit	chr04	NADH-ubiquinone oxidoreductase 49 kDa subunit	PGSC0003DMP400053890	PGSC0003DMG400030943	PGSC0003DMC400053890	PGSC0003DMT400079469	1.1.40	PS.lightreaction.cyclic electron flow-chlororespiration	pgsc0003dmp400053890	moderately similar to ( 416) ATMG00510 | Symbols: NAD7 | NADH dehydrogenase subunit 7 | chrM:132071-138153 FORWARDmoderately similar to ( 438) NDUS2_NICSY NADH-ubiquinone oxidoreductase 49 kDa subunit (EC 1.6.5.3) (EC 1.6.99.3) (NADH dehydrogenase subunit 7) - Nicotiana sylvestris (Wood tobacco)moderately similar to ( 407) loc_osm1g00230 11706.m00017 protein NADH dehydrogenase subunit 7PRK06075 N…	GO:0005739;GO:0070469	GO:0051287;GO:0048038;GO:0003954	GO:0055114;GO:0006091
CUST_23733_PI426222305	1.27534	418.685	1.12949	344.109	1.1065	382.533	0.714147	396.233	0.723074	269.78	0.879211	354.823	0.952606	340.121	1.06238	357.546	PGSC0003DMT400074648	NADH dehydrogenase subunit 5	chr11	NADH dehydrogenase subunit 5	PGSC0003DMP400050561	PGSC0003DMG400029023	PGSC0003DMC400050561	PGSC0003DMT400074648	1.1.40	PS.lightreaction.cyclic electron flow-chlororespiration	pgsc0003dmp400050561	moderately similar to ( 243) ATMG00665 | Symbols: NAD5B, NAD5.2, NAD5 | Mitochondrial NADH dehydrogenase subunit 5. The gene is trans-spliced from three different pre-cursors, NAD5a, NAD5b and NAD5c. | chrM:190740-190761 REVERSEmoderately similar to ( 260) NU5M_WHEAT NADH-ubiquinone oxidoreductase chain 5 (EC 1.6.5.3) (NADH dehydrogenase subunit 5) - Triticum aestivum (Wheat)weakly similar to ( 1…	GO:0016021;GO:0005743	GO:0008137	GO:0042773
CUST_41076_PI426222305	1.08913	2339.9	1.18911	2383.13	1.02605	2299.08	0.633752	2135.37	0.748655	1792.02	0.780617	2091.21	1.02178	2388.1	1.17436	2532.89	PGSC0003DMT400074912	NADH-ubiquinone oxidoreductase 49 kDa subunit	chr06	NADH-ubiquinone oxidoreductase 49 kDa subunit	PGSC0003DMP400050734	PGSC0003DMG400029134	PGSC0003DMC400050734	PGSC0003DMT400074912	1.1.40	PS.lightreaction.cyclic electron flow-chlororespiration	pgsc0003dmp400050734	moderately similar to ( 223) ATMG00510 | Symbols: NAD7 | NADH dehydrogenase subunit 7 | chrM:132071-138153 FORWARDmoderately similar to ( 235) NDUS2_NICSY NADH-ubiquinone oxidoreductase 49 kDa subunit (EC 1.6.5.3) (EC 1.6.99.3) (NADH dehydrogenase subunit 7) - Nicotiana sylvestris (Wood tobacco)moderately similar to ( 224) loc_osm1g00230 11706.m00017 protein NADH dehydrogenase subunit 7PRK06075 N…
CUST_28770_PI426222305	1.23074	97.5751	1.18965	86.2218	1.05166	86.4805	0.651542	80.5129	0.811491	71.941	0.881488	84.7991	1.15029	102.144	0.926107	74.1668	PGSC0003DMT400083102	Conserved gene of unknown function	chr06	Conserved gene of unknown function	PGSC0003DMP400055815	PGSC0003DMG400033055	PGSC0003DMC400055815	PGSC0003DMT400083102	1.1.5.2	PS.lightreaction.other electron carrier (ox/red).ferredoxin	pgsc0003dmp400055815	weakly similar to ( 116) AT5G07950 | Symbols: | unknown protein | chr5:2540530-2542047 REVERSE PGSC0003DMT400083102
CUST_40056_PI426222305	0.978366	1243.94	1.21212	1421.58	1.04969	1392.39	0.625439	1237.08	0.645924	921.3	0.82888	1324.51	1.00618	1394.8	1.08879	1390.88	PGSC0003DMT400015058	Ferredoxin-3, chloroplast	chr06	Ferredoxin-3, chloroplast	PGSC0003DMP400010419	PGSC0003DMG402005881	PGSC0003DMC400010419	PGSC0003DMT400015058	1.1.5.2	PS.lightreaction.other electron carrier (ox/red).ferredoxin	pgsc0003dmp400010419	weakly similar to ( 169) AT2G27510 | Symbols: ATFD3 | ATFD3 (ferredoxin 3); 2 iron, 2 sulfur cluster binding / electron carrier/ iron-sulfur cluster binding | chr2:11758281-11758748 REVERSEweakly similar to ( 176) FER3_MAIZE Ferredoxin-3, chloroplast precursor (Ferredoxin III) (Fd III) - Zea mays (Maize)weakly similar to ( 175) loc_os05g37140 12005.m28058 protein ferredoxin-6, chloroplast precurs…
CUST_31953_PI426222305	1.08439	147.306	1.19806	148.698	1.09694	152.885	0.799518	171.466	0.769223	114.877	0.804818	136.079	1.12644	162.949	1.02527	137.231	PGSC0003DMT400034339	NADH-ubiquinone oxidoreductase 49 kDa subunit	chr01	NADH-ubiquinone oxidoreductase 49 kDa subunit	PGSC0003DMP400023349	PGSC0003DMG400013204	PGSC0003DMC400023349	PGSC0003DMT400034339	1.1.40	PS.lightreaction.cyclic electron flow-chlororespiration	pgsc0003dmp400023349	moderately similar to ( 212) ATMG00510 | Symbols: NAD7 | NADH dehydrogenase subunit 7 | chrM:132071-138153 FORWARDmoderately similar to ( 225) NDUS2_NICSY NADH-ubiquinone oxidoreductase 49 kDa subunit (EC 1.6.5.3) (EC 1.6.99.3) (NADH dehydrogenase subunit 7) - Nicotiana sylvestris (Wood tobacco)moderately similar to ( 202) loc_osm1g00230 11706.m00017 protein NADH dehydrogenase subunit 7PRK06075 N…	GO:0005743;GO:0070469	GO:0051287;GO:0008137;GO:0048038	GO:0022900
CUST_28762_PI426222305	1.13932	91.1705	1.12556	82.9845	1.17467	98.6941	0.721132	92.3578	0.836768	74.6887	0.817662	81.8938	0.94762	82.4833	1.14011	90.7027	PGSC0003DMT400083105	Conserved gene of unknown function	chr06	Conserved gene of unknown function	PGSC0003DMP400055818	PGSC0003DMG400033055	PGSC0003DMC400055818	PGSC0003DMT400083105	1.1.5.2	PS.lightreaction.other electron carrier (ox/red).ferredoxin	pgsc0003dmp400055818	moderately similar to ( 257) AT5G07950 | Symbols: | unknown protein | chr5:2540530-2542047 REVERSEweakly similar to ( 166) loc_os03g11450 12003.m06596 protein expressed protein PGSC0003DMT400083105	GO:0009507
CUST_42137_PI426222305	1.14445	2120.91	1.24372	2118.39	1.30397	2513.91	1.02261	2949.47	0.940859	1934.6	0.901923	2111.45	0.919102	1844.12	0.687312	1302.92	PGSC0003DMT400067776	Ferredoxin-3, chloroplast	chr11	Ferredoxin-3, chloroplast	PGSC0003DMP400045760	PGSC0003DMG400026360	PGSC0003DMC400045760	PGSC0003DMT400067776	1.1.5.2	PS.lightreaction.other electron carrier (ox/red).ferredoxin	pgsc0003dmp400045760	weakly similar to ( 175) AT2G27510 | Symbols: ATFD3 | ATFD3 (ferredoxin 3); 2 iron, 2 sulfur cluster binding / electron carrier/ iron-sulfur cluster binding | chr2:11758281-11758748 REVERSEweakly similar to ( 172) FER3_MAIZE Ferredoxin-3, chloroplast precursor (Ferredoxin III) (Fd III) - Zea mays (Maize)weakly similar to ( 171) loc_os05g37140 12005.m28058 protein ferredoxin-6, chloroplast precurs…
CUST_22445_PI426222305	1.12482	240.733	1.10169	216.482	0.864782	192.24	0.863966	297.738	0.968373	231.094	0.961633	250.677	0.98766	228.595	1.01914	217.445	PGSC0003DMT400039552	NAD(P)H-quinone oxidoreductase subunit 2 A, chloroplastic	chr03	NAD(P)H-quinone oxidoreductase subunit 2 A, chloroplastic	PGSC0003DMP400026817	PGSC0003DMG400015298	PGSC0003DMC400026817	PGSC0003DMT400039552	1.1.40	PS.lightreaction.cyclic electron flow-chlororespiration	pgsc0003dmp400026817	moderately similar to ( 246) ATCG01250 | Symbols: NDHB.2 | NADH dehydrogenase ND2 | chrC:141854-143708 FORWARDmoderately similar to ( 252) NU2C_SOLTU NAD(P)H-quinone oxidoreductase chain 2, chloroplast (EC 1.6.5.-) (NAD(P)H dehydrogenase, chain 2) (NADH-plastoquinone oxidoreductase chain 2) - Solanum tuberosum (Potato)moderately similar to ( 275) loc_os02g24580 12002.m07605 protein NAD(P)H-depend…
CUST_13147_PI426222305	1.10482	309.157	1.13502	294.286	0.930261	271.05	0.889902	433.94	1.08273	338.342	0.996096	344.52	0.908001	276.893	1.04754	301.23	PGSC0003DMT400022652	NAD(P)H-quinone oxidoreductase subunit H, chloroplastic	chr01	NAD(P)H-quinone oxidoreductase subunit H, chloroplastic	PGSC0003DMP400015430	PGSC0003DMG401008783	PGSC0003DMC400015430	PGSC0003DMT400022652	1.1.40	PS.lightreaction.cyclic electron flow-chlororespiration	pgsc0003dmp400015430	moderately similar to ( 379) ATCG01110 | Symbols: NDHH | Encodes the 49KDa plastid NAD(P)H dehydrogenase subunit H protein. Its transcription is regulated by an ndhF-specific plastid sigma factor, SIG4. | chrC:122011-123192 REVERSEmoderately similar to ( 414) NDHH_TOBAC NAD(P)H-quinone oxidoreductase chain H, chloroplast (EC 1.6.5.-) (NAD(P)H dehydrogenase, chain H) (NADH-plastoquinone oxidoreduc…
CUST_13077_PI426222305	1.10669	1093.8	1.06877	978.326	0.92052	953.683	0.722761	1128.5	1.06054	1172.24	0.821056	1001.09	0.877619	945.969	1.04845	1044.06	PGSC0003DMT400022653	NAD(P)H-quinone oxidoreductase subunit 1, chloroplastic	chr12	NAD(P)H-quinone oxidoreductase subunit 1, chloroplastic	PGSC0003DMP400015431	PGSC0003DMG402008783	PGSC0003DMC400015431	PGSC0003DMT400022653	1.1.40	PS.lightreaction.cyclic electron flow-chlororespiration	pgsc0003dmp400015431	weakly similar to ( 180) ATCG01100 | Symbols: NDHA | NADH dehydrogenase ND1 | chrC:119847-122009 REVERSEmoderately similar to ( 215) NU1C_SOLTU NAD(P)H-quinone oxidoreductase subunit 1, chloroplast (EC 1.6.5.-) (NAD(P)H dehydrogenase subunit 1) (NDH subunit 1) (NADH-plastoquinone oxidoreductase subunit 1) - Solanum tuberosum (Potato)weakly similar to ( 162) loc_osp1g00960 11562.m00087 protein NAD…

## Sheet: BIN1 Calvin cycle TableS16
Code ()*	WL6		Blue6		Red6		WL24		Blue24		Red24		Dark (18oC)		Dark (21oC)
Systematic	Normalized	Raw	Normalized	Raw	Normalized	Raw	Normalized	Raw	Normalized	Raw	Normalized	Raw	Normalized	Raw	Normalized	Raw	PrimaryAccession	UniRef based putative functional annotation	Chromosome	putative function	peptide ID	gene ID	CDS ID	transcript ID	MpMan bin	MapMan name	MapMan pep	MapMan description	GO: CC	GO: MF	GO: BP
CUST_7858_PI426222305	1.16678	5.21214	1.18225	4.6919	0.988359	4.31613	2.72308	115.274	1.14605	6.13062	2.36448	39.5784	0.952427	4.54458	1.19829	5.4283	PGSC0003DMT400025712	Conserved gene of unknown function	chr04	Conserved gene of unknown function	PGSC0003DMP400017526	PGSC0003DMG400009928	PGSC0003DMC400017526	PGSC0003DMT400025712	1.3	PS.calvin cycle	pgsc0003dmp400017526	weakly similar to ( 110) AT1G76560 | Symbols: CP12-3 | CP12-3 | chr1:28728285-28728689 FORWARDvery weakly similar to (86.3) loc_os08g40240 12008.m08004 protein CP12, putative, expressed PGSC0003DMT400025712
CUST_4132_PI426222305	1.04032	3.89595	1.12544	4.10852	0.995373	4.29255	2.86734	131.177	0.932642	4.13632	2.7202	57.393	0.959186	4.34142	1.04369	3.88135	PGSC0003DMT400038242	Transketolase	chr01	Transketolase	PGSC0003DMP400025974	PGSC0003DMG400014756	PGSC0003DMC400025974	PGSC0003DMT400038242	1.3.8	PS.calvin cycle.transketolase	pgsc0003dmp400025974	highly similar to ( 702) AT3G60750 | Symbols: | transketolase, putative | chr3:22454004-22456824 FORWARDhighly similar to ( 706) TKTC_SOLTU Transketolase, chloroplast precursor (EC 2.2.1.1) (TK) - Solanum tuberosum (Potato)highly similar to ( 721) loc_os06g04270 12006.m05156 protein transketolase, chloroplast precursor, putative, expressedTktA PRK05899 PRK12753 PRK12754 Transketolase_N TPP_TK COG…
CUST_33718_PI426222305	1.03299	4.62481	1.14023	4.72725	1.07392	5.16662	2.33124	66.7389	0.936171	4.92119	2.10498	29.0498	0.960039	4.90332	1.03633	4.64102	PGSC0003DMT400067906	Ribulose bisphosphate carboxylase small chain 2B, chloroplastic	chr02	Ribulose bisphosphate carboxylase small chain 2B, chloroplastic	PGSC0003DMP400045852	PGSC0003DMG400026409	PGSC0003DMC400045852	PGSC0003DMT400067906	1.3.2	PS.calvin cycle.rubisco small subunit	pgsc0003dmp400045852	moderately similar to ( 273) AT5G38410 | Symbols: | ribulose bisphosphate carboxylase small chain 3B / RuBisCO small subunit 3B (RBCS-3B) (ATS3B) | chr5:15377501-15378306 REVERSEmoderately similar to ( 338) RBSB_SOLTU Ribulose bisphosphate carboxylase small chain 2B, chloroplast precursor (EC 4.1.1.39) (RuBisCO small subunit 2B) - Solanum tuberosum (Potato)moderately similar to ( 242) loc_os12g19…	GO:0009507	GO:0004497;GO:0016984	GO:0009853;GO:0019253
CUST_28487_PI426222305	1.03374	4.56278	1.37971	6.38581	0.988359	4.45229	3.6959	189.876	0.936949	4.74442	3.02321	79.6857	0.982363	4.75176	1.03633	4.50996	PGSC0003DMT400009905	Phosphoglycerate kinase	chr08	Phosphoglycerate kinase	PGSC0003DMP400006900	PGSC0003DMG400003882	PGSC0003DMC400006900	PGSC0003DMT400009905	1.3.3	PS.calvin cycle.phosphoglycerate kinase	pgsc0003dmp400006900	weakly similar to ( 125) AT5G17660 | Symbols: | tRNA (guanine-N7-)-methyltransferase | chr5:5818778-5820811 REVERSEmoderately similar to ( 214) loc_os10g30550 12010.m05915 protein phosphoglycerate kinase, chloroplast precursor, putative, expressedMethyltransf_4 trmB PGSC0003DMT400009905		GO:0008176	GO:0006400
CUST_39052_PI426222305	1.04032	4.71375	1.34887	5.88364	0.999572	4.71951	2.46258	84.4576	0.932642	4.71522	2.63273	52.7211	0.976856	4.99992	1.04369	4.5758	PGSC0003DMT400068572	Fructose-bisphosphate aldolase	chr10	Cc-nbs-lrr resistance protein	PGSC0003DMP400046330	PGSC0003DMG400026666	PGSC0003DMC400046330	PGSC0003DMT400068572	1.3.6	PS.calvin cycle.aldolase	pgsc0003dmp400046330	moderately similar to ( 325) AT4G38970 | Symbols: | fructose-bisphosphate aldolase, putative | chr4:18163769-18165659 REVERSEmoderately similar to ( 338) ALFC_ORYSA Fructose-bisphosphate aldolase, chloroplast precursor (EC 4.1.2.13) (ALDP) - Oryza sativa (Rice)moderately similar to ( 338) loc_os11g07020 12011.m28744 protein fructose-bisphosphate aldolase, chloroplast precursor, putative, expresse…
CUST_12154_PI426222305	1.00887	5.05527	1.55952	8.07809	1.05768	5.521	3.78329	352.082	0.925311	5.26903	3.93197	109.313	0.985067	5.45695	1.42813	8.05041	PGSC0003DMT400010489	Ribulose bisphosphate carboxylase small chain	chr07	Ribulose bisphosphate carboxylase small chain	PGSC0003DMP400007324	PGSC0003DMG400004097	PGSC0003DMC400007324	PGSC0003DMT400010489	1.3.2	PS.calvin cycle.rubisco small subunit	pgsc0003dmp400007324	weakly similar to ( 191) AT5G38410 | Symbols: | ribulose bisphosphate carboxylase small chain 3B / RuBisCO small subunit 3B (RBCS-3B) (ATS3B) | chr5:15377501-15378306 REVERSEweakly similar to ( 198) RBS_LACSA Ribulose bisphosphate carboxylase small chain, chloroplast precursor (EC 4.1.1.39) (RuBisCO small subunit) - Lactuca sativa (Garden lettuce)moderately similar to ( 204) loc_os02g05830 12002.…
CUST_2543_PI426222305	1.07137	5.23078	1.21616	5.56044	0.985677	4.90406	1.79868	35.5483	0.91974	5.02763	1.88052	22.8817	0.984273	5.19569	1.06256	5.20729	PGSC0003DMT400028766	Ribulose bisphosphate carboxylase/oxygenase activase 1, chloroplastic	chr10	Ribulose bisphosphate carboxylase/oxygenase activase 1, chloroplastic	PGSC0003DMP400019560	PGSC0003DMG400011072	PGSC0003DMC400019560	PGSC0003DMT400028766	1.3.13	PS.calvin cycle.rubisco interacting	pgsc0003dmp400019560	highly similar to ( 702) AT2G39730 | Symbols: RCA | RCA (RUBISCO ACTIVASE); ADP binding / ATP binding / enzyme regulator/ ribulose-1,5-bisphosphate carboxylase/oxygenase activator | chr2:16571174-16573345 REVERSEhighly similar to ( 786) RCA1_TOBAC Ribulose bisphosphate carboxylase/oxygenase activase 1, chloroplast precursor (RuBisCO activase 1) (RA 1) - Nicotiana tabacum (Common tobacco)highly si…
CUST_36424_PI426222305	0.980362	4.08494	1.06058	4.07418	0.938006	4.32832	1.95118	32.7377	0.938187	4.892	2.18985	26.7857	0.903904	4.36768	1.07939	4.71484	PGSC0003DMT400079906	Methyltransferase	chr01	Methyltransferase	PGSC0003DMP400054207	PGSC0003DMG400031121	PGSC0003DMC400054207	PGSC0003DMT400079906	1.3.3	PS.calvin cycle.phosphoglycerate kinase	pgsc0003dmp400054207	moderately similar to ( 266) AT5G17660 | Symbols: | tRNA (guanine-N7-)-methyltransferase | chr5:5818778-5820811 REVERSEmoderately similar to ( 267) loc_os01g35170 12001.m09819 protein tRNA (guanine-N(1)-)-methyltransferase, putative, expressedtrmB Methyltransf_4 COG0220 PGSC0003DMT400079906
CUST_20064_PI426222305	1.03299	4.10586	1.11751	4.51041	0.988359	4.44997	2.13389	56.8452	0.926071	4.46286	2.41231	41.8989	1.01042	5.18883	1.03633	4.41404	PGSC0003DMT400049395	Fructose-1,6-bisphosphatase	chr05	Fructose-1,6-bisphosphatase	PGSC0003DMP400033339	PGSC0003DMG400019189	PGSC0003DMC400033339	PGSC0003DMT400049395	1.3.7	PS.calvin cycle.FBPase	pgsc0003dmp400033339	highly similar to ( 601) AT3G54050 | Symbols: | fructose-1,6-bisphosphatase, putative / D-fructose-1,6-bisphosphate 1-phosphohydrolase, putative / FBPase, putative | chr3:20016951-20018527 FORWARDhighly similar to ( 603) F16P1_BRANA Fructose-1,6-bisphosphatase, chloroplast precursor (EC 3.1.3.11) (D-fructose-1,6-bisphosphate 1-phosphohydrolase) (FBPase) - Brassica napus (Rape)highly similar to ( …	GO:0048046;GO:0009570;GO:0010319	GO:0046872;GO:0042132	GO:0009409;GO:0009773;GO:0005985;GO:0019253;GO:0030388
CUST_33727_PI426222305	1.0673	4.75415	1.14793	4.76588	1.0015	4.72734	2.15962	58.0125	0.932642	4.8097	2.01336	25.2885	1.16253	6.10591	1.04369	4.69718	PGSC0003DMT400067904	Ribulose bisphosphate carboxylase small chain 2A, chloroplastic	chr02	Ribulose bisphosphate carboxylase small chain 2B, chloroplastic	PGSC0003DMP400045850	PGSC0003DMG400026409	PGSC0003DMC400045850	PGSC0003DMT400067904	1.3.2	PS.calvin cycle.rubisco small subunit	pgsc0003dmp400045850	moderately similar to ( 201) AT1G67090 | Symbols: RBCS1A | RBCS1A (RIBULOSE BISPHOSPHATE CARBOXYLASE SMALL CHAIN 1A); copper ion binding / ribulose-bisphosphate carboxylase | chr1:25048590-25049249 REVERSEmoderately similar to ( 246) RBSB_SOLTU Ribulose bisphosphate carboxylase small chain 2B, chloroplast precursor (EC 4.1.1.39) (RuBisCO small subunit 2B) - Solanum tuberosum (Potato)weakly simila…
CUST_28570_PI426222305	1.03299	4.2427	1.11751	4.36599	0.988359	4.36957	2.63125	104.553	1.04693	5.43466	2.89443	70.2198	1.21466	6.47458	1.03633	4.2174	PGSC0003DMT400009906	Phosphoglycerate kinase	chr08	Phosphoglycerate kinase	PGSC0003DMP400006901	PGSC0003DMG400003882	PGSC0003DMC400006901	PGSC0003DMT400009906	1.3.3	PS.calvin cycle.phosphoglycerate kinase	pgsc0003dmp400006901	weakly similar to ( 182) AT3G12780 | Symbols: PGK1 | PGK1 (PHOSPHOGLYCERATE KINASE 1); phosphoglycerate kinase | chr3:4061127-4063140 REVERSEweakly similar to ( 181) PGKH_TOBAC Phosphoglycerate kinase, chloroplast precursor (EC 2.7.2.3) - Nicotiana tabacum (Common tobacco)moderately similar to ( 388) loc_os10g30550 12010.m05915 protein phosphoglycerate kinase, chloroplast precursor, putative, exp…		GO:0008176;GO:0004618	GO:0006096;GO:0071704;GO:0006400
CUST_37133_PI426222305	0.585907	13.384	1.35255	24.727	0.903582	18.4774	3.16629	567.384	0.799725	17.1352	3.16325	262.092	0.877174	19.8013	1.1159	21.7461	PGSC0003DMT400030012	R2 late blight resistance protein	chr04	R2 late blight resistance protein	PGSC0003DMP400020397	PGSC0003DMG400011518	PGSC0003DMC400020397	PGSC0003DMT400030012	1.3.5	PS.calvin cycle.TPI	pgsc0003dmp400020397	weakly similar to ( 154) AT2G21170 | Symbols: TIM | TIM (TRIOSEPHOSPHATE ISOMERASE); catalytic/ triose-phosphate isomerase | chr2:9071047-9073106 REVERSEweakly similar to ( 160) TPIC_SPIOL Triosephosphate isomerase, chloroplast precursor (EC 5.3.1.1) (TIM) (Triose-phosphate isomerase) - Spinacia oleracea (Spinach)weakly similar to ( 142) loc_os09g36450 12009.m060049 protein triosephosphate isomer…
CUST_13343_PI426222305	1.02735	5.23958	1.70872	9.2514	0.971949	5.09761	3.33828	134.155	0.914866	5.30308	2.68594	66.4257	1.07588	6.10521	1.06934	5.55607	PGSC0003DMT400087142	Glyceraldehyde-3-phosphate dehydrogenase	chr02	Glyceraldehyde-3-phosphate dehydrogenase	PGSC0003DMP400058817	PGSC0003DMG400036713	PGSC0003DMC400058817	PGSC0003DMT400087142	1.3.4	PS.calvin cycle.GAP	pgsc0003dmp400058817	moderately similar to ( 279) AT1G12900 | Symbols: GAPA-2 | GAPA-2 (GLYCERALDEHYDE 3-PHOSPHATE DEHYDROGENASE A SUBUNIT 2); NAD or NADH binding / binding / catalytic/ glyceraldehyde-3-phosphate dehydrogenase (phosphorylating)/ glyceraldehyde-3-phosphate dehydrogenase | chr1:4392634-4393850 REVERSEmoderately similar to ( 325) G3PA_TOBAC Glyceraldehyde-3-phosphate dehydrogenase A, chloroplast precurs…
CUST_1990_PI426222305	1.05385	4.79272	1.18636	5.27359	0.995373	4.52596	1.64421	27.3631	0.932642	4.65859	2.11765	28.7489	0.975052	4.9132	1.04647	4.6761	PGSC0003DMT400028767	Ribulose bisphosphate carboxylase/oxygenase activase 1, chloroplastic	chr10	Ribulose bisphosphate carboxylase/oxygenase activase 1, chloroplastic	PGSC0003DMP400019561	PGSC0003DMG400011072	PGSC0003DMC400019561	PGSC0003DMT400028767	1.3.13	PS.calvin cycle.rubisco interacting	pgsc0003dmp400019561	highly similar to ( 706) AT2G39730 | Symbols: RCA | RCA (RUBISCO ACTIVASE); ADP binding / ATP binding / enzyme regulator/ ribulose-1,5-bisphosphate carboxylase/oxygenase activator | chr2:16571174-16573345 REVERSEhighly similar to ( 790) RCA1_TOBAC Ribulose bisphosphate carboxylase/oxygenase activase 1, chloroplast precursor (RuBisCO activase 1) (RA 1) - Nicotiana tabacum (Common tobacco)highly si…
CUST_16193_PI426222305	1.1115	4.7306	1.4681	6.68182	1.01103	4.55602	2.19511	61.4508	0.926071	4.07737	2.79496	43.1024	0.952427	4.23225	1.15017	4.93969	PGSC0003DMT400031351	Fructose-bisphosphate aldolase	chr02	Fructose-bisphosphate aldolase	PGSC0003DMP400021255	PGSC0003DMG400012012	PGSC0003DMC400021255	PGSC0003DMT400031351	1.3.6	PS.calvin cycle.aldolase	pgsc0003dmp400021255	highly similar to ( 672) AT4G38970 | Symbols: | fructose-bisphosphate aldolase, putative | chr4:18163769-18165659 REVERSEhighly similar to ( 647) ALFC_ORYSA Fructose-bisphosphate aldolase, chloroplast precursor (EC 4.1.2.13) (ALDP) - Oryza sativa (Rice)highly similar to ( 647) loc_os11g07020 12011.m28744 protein fructose-bisphosphate aldolase, chloroplast precursor, putative, expressedGlycolytic …
CUST_19391_PI426222305	1.02637	4.93949	1.50322	7.69701	0.975219	4.90604	1.88314	37.1594	0.898675	5.02463	2.24224	25.652	0.962195	5.13199	1.05176	5.30253	PGSC0003DMT400073004	Ribulose-1,5 bisphosphate carboxylase/oxygenase large subunit N-methyltransferase, chloroplastic	chr05	Ribulose-1,5 bisphosphate carboxylase/oxygenase large subunit N-methyltransferase, chloroplastic	PGSC0003DMP400049398	PGSC0003DMG400028394	PGSC0003DMC400049398	PGSC0003DMT400073004	1.3.13	PS.calvin cycle.rubisco interacting	pgsc0003dmp400049398	highly similar to ( 526) AT1G14030 | Symbols: | ribulose-1,5 bisphosphate carboxylase oxygenase large subunit N-methyltransferase, putative | chr1:4805493-4807440 REVERSEhighly similar to ( 762) RBCMT_TOBAC Ribulose-1,5 bisphosphate carboxylase/oxygenase large subunit N-methyltransferase, chloroplast precursor (EC 2.1.1.127) ([Ribulose-bisphosphate carboxylase]-lysine N-methyltransferase) (RuBisC…
CUST_11496_PI426222305	1.03299	4.10046	2.25016	10.9898	1.14198	5.61456	3.85981	323.172	0.926071	4.36145	4.43943	156.352	0.952427	4.49381	1.03633	4.03416	PGSC0003DMT400091016	Rubisco activase	chr03	Rubisco activase	PGSC0003DMP400062691	PGSC0003DMG400040587	PGSC0003DMC400062691	PGSC0003DMT400091016	1.3.13	PS.calvin cycle.rubisco interacting	pgsc0003dmp400062691	weakly similar to ( 101) RCA2_TOBAC Ribulose bisphosphate carboxylase/oxygenase activase 2, chloroplast precursor (RuBisCO activase 2) (RA 2) - Nicotiana tabacum (Common tobacco)very weakly similar to (93.2) loc_os11g47970 12011.m28706 protein ribulose bisphosphate carboxylase/oxygenase activase, chloroplast precursor, putative, expressed PGSC0003DMT400091016
CUST_46746_PI426222305	0.995334	4.97687	1.75692	8.63743	0.975689	5.30177	2.25523	82.348	1.27341	8.03561	2.44355	51.5667	1.02405	5.78371	1.18228	6.24166	PGSC0003DMT400065226	Chitinase 1	chr11	Chitinase 1	PGSC0003DMP400043980	PGSC0003DMG400025352	PGSC0003DMC400043980	PGSC0003DMT400065226	1.3.13	PS.calvin cycle.rubisco interacting	pgsc0003dmp400043980	very weakly similar to (90.5) RUAP_SOYBN RuBisCO-associated protein - Glycine max (Soybean)moderately similar to ( 276) loc_os10g28050 12010.m05688 protein chitinase 2, putative, expressed PGSC0003DMT400065226
CUST_45235_PI426222305	0.869472	6.86299	3.17036	26.2498	1.56343	13.1889	4.1503	351.891	0.695431	5.59581	2.95271	203.271	0.652038	5.11366	0.8884	6.8241	PGSC0003DMT400027988	Fructose-1,6-bisphosphatase, cytosolic	chr12	Fructose-1,6-bisphosphatase, cytosolic	PGSC0003DMP400019067	PGSC0003DMG400010788	PGSC0003DMC400019067	PGSC0003DMT400027988	1.3.7	PS.calvin cycle.FBPase	pgsc0003dmp400019067	highly similar to ( 605) AT1G43670 | Symbols: | fructose-1,6-bisphosphatase, putative / D-fructose-1,6-bisphosphate 1-phosphohydrolase, putative / FBPase, putative | chr1:16468184-16470347 FORWARDhighly similar to ( 642) F16P2_SOLTU Fructose-1,6-bisphosphatase, cytosolic (EC 3.1.3.11) (D-fructose-1,6-bisphosphate 1-phosphohydrolase) (FBPase) (CY-F1) - Solanum tuberosum (Potato)highly similar to (…
CUST_19469_PI426222305	0.995333	4.44233	2.34284	14.0872	1.55224	10.0495	3.89933	372.314	0.965532	5.26253	3.76786	169.109	0.917708	4.7187	1.30495	6.64808	PGSC0003DMT400072873	Ribulose-1,5 bisphosphate carboxylase/oxygenase large subunit N-methyltransferase, chloroplastic	chr05	Ribulose-1,5 bisphosphate carboxylase/oxygenase large subunit N-methyltransferase, chloroplastic	PGSC0003DMP400049298	PGSC0003DMG400028348	PGSC0003DMC400049298	PGSC0003DMT400072873	1.3.13	PS.calvin cycle.rubisco interacting	pgsc0003dmp400049298	highly similar to ( 599) AT1G14030 | Symbols: | ribulose-1,5 bisphosphate carboxylase oxygenase large subunit N-methyltransferase, putative | chr1:4805493-4807440 REVERSEhighly similar to ( 830) RBCMT_TOBAC Ribulose-1,5 bisphosphate carboxylase/oxygenase large subunit N-methyltransferase, chloroplast precursor (EC 2.1.1.127) ([Ribulose-bisphosphate carboxylase]-lysine N-methyltransferase) (RuBisC…
CUST_19200_PI426222305	1.04741	4.8118	1.43098	7.21685	0.938006	4.60493	1.36916	19.4494	0.970878	5.29303	1.86438	21.7208	1.06454	5.9206	0.983536	4.25244	PGSC0003DMT400073003	Ribulose-1,5 bisphosphate carboxylase/oxygenase large subunit N-methyltransferase, chloroplastic	chr05	Ribulose-1,5 bisphosphate carboxylase/oxygenase large subunit N-methyltransferase, chloroplastic	PGSC0003DMP400049397	PGSC0003DMG400028394	PGSC0003DMC400049397	PGSC0003DMT400073003	1.3.13	PS.calvin cycle.rubisco interacting	pgsc0003dmp400049397	moderately similar to ( 372) AT1G14030 | Symbols: | ribulose-1,5 bisphosphate carboxylase oxygenase large subunit N-methyltransferase, putative | chr1:4805493-4807440 REVERSEmoderately similar to ( 493) RBCMT_TOBAC Ribulose-1,5 bisphosphate carboxylase/oxygenase large subunit N-methyltransferase, chloroplast precursor (EC 2.1.1.127) ([Ribulose-bisphosphate carboxylase]-lysine N-methyltransferase)…		GO:0008176	GO:0006400
CUST_46732_PI426222305	1.22972	5.77847	1.14907	4.74995	1.51663	9.08911	1.88572	40.254	0.926071	4.54941	1.92093	22.6733	0.956203	4.80179	1.03633	4.39982	PGSC0003DMT400065227	Chitinase 1	chr11	Chitinase 1	PGSC0003DMP400043981	PGSC0003DMG400025353	PGSC0003DMC400043981	PGSC0003DMT400065227	1.3.13	PS.calvin cycle.rubisco interacting	pgsc0003dmp400043981	very weakly similar to (96.3) RUAP_SOYBN RuBisCO-associated protein - Glycine max (Soybean)moderately similar to ( 271) loc_os10g28050 12010.m05688 protein chitinase 2, putative, expressed PGSC0003DMT400065227
CUST_37042_PI426222305	1.15354	5.29704	1.05112	3.94455	0.929635	3.8641	2.22097	61.2001	1.2791	7.82286	1.63094	16.3458	0.895838	4.21193	1.18194	5.41052	PGSC0003DMT400061950	Fructose-1,6-bisphosphatase, cytosolic	chr04	Fructose-1,6-bisphosphatase, cytosolic	PGSC0003DMP400041706	PGSC0003DMG400024109	PGSC0003DMC400041706	PGSC0003DMT400061950	1.3.7	PS.calvin cycle.FBPase	pgsc0003dmp400041706	moderately similar to ( 394) AT1G43670 | Symbols: | fructose-1,6-bisphosphatase, putative / D-fructose-1,6-bisphosphate 1-phosphohydrolase, putative / FBPase, putative | chr1:16468184-16470347 FORWARDmoderately similar to ( 447) F16P2_SOLTU Fructose-1,6-bisphosphatase, cytosolic (EC 3.1.3.11) (D-fructose-1,6-bisphosphate 1-phosphohydrolase) (FBPase) (CY-F1) - Solanum tuberosum (Potato)moderately …
CUST_36689_PI426222305	0.702207	5.39754	1.04017	8.35112	0.567112	4.21426	3.71708	74.8166	1.44662	14.1954	1.8089	35.8347	0.762936	7.29443	0.760759	6.08439	PGSC0003DMT400004042	Triosephosphate isomerase, chloroplastic	chr01	Triosephosphate isomerase, chloroplastic	PGSC0003DMP400002889	PGSC0003DMG400001595	PGSC0003DMC400002889	PGSC0003DMT400004042	1.3.5	PS.calvin cycle.TPI	pgsc0003dmp400002889	moderately similar to ( 465) AT2G21170 | Symbols: TIM | TIM (TRIOSEPHOSPHATE ISOMERASE); catalytic/ triose-phosphate isomerase | chr2:9071047-9073106 REVERSEhighly similar to ( 509) TPIC_SPIOL Triosephosphate isomerase, chloroplast precursor (EC 5.3.1.1) (TIM) (Triose-phosphate isomerase) - Spinacia oleracea (Spinach)moderately similar to ( 444) loc_os09g36450 12009.m060049 protein triosephosphat…
CUST_30376_PI426222305	1.02073	4.81651	1.69551	8.32484	0.910015	4.14175	6.88426	136.44	1.90913	13.7056	2.7734	78.6528	0.999392	5.35465	0.954187	4.12083	PGSC0003DMT400069751	Chloroplast sedoheptulose-1,7-bisphosphatase	chr05	Chloroplast sedoheptulose-1,7-bisphosphatase	PGSC0003DMP400047118	PGSC0003DMG400027125	PGSC0003DMC400047118	PGSC0003DMT400069751	1.3.9	PS.calvin cycle.seduheptulose bisphosphatase	pgsc0003dmp400047118	moderately similar to ( 460) AT3G55800 | Symbols: SBPASE | SBPASE (sedoheptulose-bisphosphatase); phosphoric ester hydrolase/ sedoheptulose-bisphosphatase | chr3:20709640-20711421 FORWARDmoderately similar to ( 475) S17P_SPIOL Sedoheptulose-1,7-bisphosphatase, chloroplast precursor (EC 3.1.3.37) (Sedoheptulose-bisphosphatase) (SBPase) (SED(1,7)P2ase) - Spinacia oleracea (Spinach)moderately simila…
CUST_28611_PI426222305	0.792832	37.4345	1.03045	45.1575	1.07815	52.3393	2.01315	284.247	1.04833	54.5655	1.30709	110.124	0.796236	40.6608	0.894178	41.9144	PGSC0003DMT400009908	Phosphoglycerate kinase	chr08	Phosphoglycerate kinase	PGSC0003DMP400006903	PGSC0003DMG400003882	PGSC0003DMC400006903	PGSC0003DMT400009908	1.3.3	PS.calvin cycle.phosphoglycerate kinase	pgsc0003dmp400006903	weakly similar to ( 107) loc_os10g30550 12010.m05915 protein phosphoglycerate kinase, chloroplast precursor, putative, expressed PGSC0003DMT400009908
CUST_24042_PI426222305	0.820055	11.0474	0.920382	11.7925	1.02139	13.1653	2.65439	102.607	1.38025	19.1821	1.93394	59.8535	0.710232	9.53344	0.839819	10.4066	PGSC0003DMT400083786	Fructose-1,6-bisphosphatase	chr01	Fructose-1,6-bisphosphatase	PGSC0003DMP400056079	PGSC0003DMG400033584	PGSC0003DMC400056079	PGSC0003DMT400083786	1.3.7	PS.calvin cycle.FBPase	pgsc0003dmp400056079	highly similar to ( 514) AT5G64380 | Symbols: | fructose-1,6-bisphosphatase family protein | chr5:25741342-25743024 FORWARDmoderately similar to ( 265) F16P1_BRANA Fructose-1,6-bisphosphatase, chloroplast precursor (EC 3.1.3.11) (D-fructose-1,6-bisphosphate 1-phosphohydrolase) (FBPase) - Brassica napus (Rape)highly similar to ( 509) loc_os06g45370 12006.m09064 protein fructose-1,6-bisphosphatase,…
CUST_2516_PI426222305	0.691193	14.701	0.673877	13.9501	0.936302	19.7958	1.74498	82.0512	0.920454	19.6042	1.24105	34.6043	0.837033	18.4633	1.13688	22.106	PGSC0003DMT400072632	Fructose-bisphosphate aldolase	chr10	Fructose-bisphosphate aldolase	PGSC0003DMP400049131	PGSC0003DMG400028261	PGSC0003DMC400049131	PGSC0003DMT400072632	1.3.6	PS.calvin cycle.aldolase	pgsc0003dmp400049131	highly similar to ( 599) AT3G52930 | Symbols: | fructose-bisphosphate aldolase, putative | chr3:19627383-19628874 REVERSEhighly similar to ( 602) ALF_ORYSA Fructose-bisphosphate aldolase cytoplasmic isozyme (EC 4.1.2.13) (Gravity-specific protein GSC 233) - Oryza sativa (Rice)highly similar to ( 602) loc_os05g33380 12005.m07570 protein fructose-bisphosphate aldolase cytoplasmic isozyme, putative,…
CUST_36360_PI426222305	0.557395	8.60418	0.871453	12.038	1.11004	16.9926	1.63259	51.2058	1.20471	20.8738	2.18701	46.987	0.545511	8.97653	1.15013	16.7999	PGSC0003DMT400079908	Methyltransferase	chr01	Methyltransferase	PGSC0003DMP400054209	PGSC0003DMG400031121	PGSC0003DMC400054209	PGSC0003DMT400079908	1.3.3	PS.calvin cycle.phosphoglycerate kinase	pgsc0003dmp400054209	moderately similar to ( 237) AT5G17660 | Symbols: | tRNA (guanine-N7-)-methyltransferase | chr5:5818778-5820811 REVERSEmoderately similar to ( 229) loc_os01g35170 12001.m09819 protein tRNA (guanine-N(1)-)-methyltransferase, putative, expressedCOG0220 Methyltransf_4 trmB PGSC0003DMT400079908	GO:0009570	GO:0005524
CUST_15098_PI426222305	1.06722	11.5072	1.18128	12.37	0.778183	8.4542	0.903241	41.4733	1.06472	12.3194	2.0005	35.8728	0.673272	7.71845	0.86854	9.52921	PGSC0003DMT400057332	Fructose-bisphosphate aldolase	chr07	Fructose-bisphosphate aldolase	PGSC0003DMP400038572	PGSC0003DMG400022263	PGSC0003DMC400038572	PGSC0003DMT400057332	1.3.6	PS.calvin cycle.aldolase	pgsc0003dmp400038572	highly similar to ( 575) AT4G26530 | Symbols: | fructose-bisphosphate aldolase, putative | chr4:13391566-13392937 FORWARDhighly similar to ( 572) ALF1_PEA Fructose-bisphosphate aldolase, cytoplasmic isozyme 1 (EC 4.1.2.13) - Pisum sativum (Garden pea)highly similar to ( 543) loc_os06g40640 12006.m091735 protein fructose-bisphosphate aldolase, cytoplasmic isozyme 1, putative, expressedGlycolytic F…	GO:0005737	GO:0008886	GO:0055114
CUST_43838_PI426222305	0.993132	19.0115	0.670265	13.8254	0.978166	21.5129	1.36454	56.5122	1.15688	26.5569	1.02427	23.2879	0.900289	18.6433	0.922746	24.0026	PGSC0003DMT400040116	Chitinase 1	chr11	Chitinase 1	PGSC0003DMP400027201	PGSC0003DMG400015523	PGSC0003DMC400027201	PGSC0003DMT400040116	1.3.13	PS.calvin cycle.rubisco interacting	pgsc0003dmp400027201	very weakly similar to (86.7) RUAP_SOYBN RuBisCO-associated protein - Glycine max (Soybean)moderately similar to ( 291) loc_os10g28050 12010.m05688 protein chitinase 2, putative, expressed PGSC0003DMT400040116
CUST_37108_PI426222305	1.12258	17.9403	0.587057	8.78296	0.893734	15.5007	1.50511	102.168	0.734955	14.7996	1.21701	42.6393	0.80567	14.2803	0.782425	12.5514	PGSC0003DMT400030013	Triosephosphate isomerase, chloroplastic	chr04	R2 late blight resistance protein	PGSC0003DMP400020398	PGSC0003DMG400011518	PGSC0003DMC400020398	PGSC0003DMT400030013	1.3.5	PS.calvin cycle.TPI	pgsc0003dmp400020398	weakly similar to ( 154) AT2G21170 | Symbols: TIM | TIM (TRIOSEPHOSPHATE ISOMERASE); catalytic/ triose-phosphate isomerase | chr2:9071047-9073106 REVERSEweakly similar to ( 160) TPIC_SPIOL Triosephosphate isomerase, chloroplast precursor (EC 5.3.1.1) (TIM) (Triose-phosphate isomerase) - Spinacia oleracea (Spinach)weakly similar to ( 142) loc_os09g36450 12009.m060049 protein triosephosphate isomer…
CUST_39047_PI426222305	1.55245	9.32872	1.55198	8.51725	1.40703	9.38345	1.71972	49.4825	0.784008	4.37931	2.03975	41.8949	1.35773	9.37264	0.877357	4.21471	PGSC0003DMT400068573	Fructose-bisphosphate aldolase	chr10	Cc-nbs-lrr resistance protein	PGSC0003DMP400046331	PGSC0003DMG400026666	PGSC0003DMC400046331	PGSC0003DMT400068573	1.3.6	PS.calvin cycle.aldolase	pgsc0003dmp400046331	weakly similar to ( 132) AT4G38970 | Symbols: | fructose-bisphosphate aldolase, putative | chr4:18163769-18165659 REVERSEweakly similar to ( 134) ALFC_ORYSA Fructose-bisphosphate aldolase, chloroplast precursor (EC 4.1.2.13) (ALDP) - Oryza sativa (Rice)weakly similar to ( 134) loc_os11g07020 12011.m28744 protein fructose-bisphosphate aldolase, chloroplast precursor, putative, expressedGlycolytic …		GO:0005524
CUST_39038_PI426222305	1.58069	14.9625	0.925481	9.10307	1.35669	15.3844	1.42786	50.6293	0.487928	4.76417	1.39783	30.2275	1.10337	13.807	1.04995	11.1363	PGSC0003DMT400068571	Fructose-bisphosphate aldolase	chr10	Cc-nbs-lrr resistance protein	PGSC0003DMP400046329	PGSC0003DMG400026666	PGSC0003DMC400046329	PGSC0003DMT400068571	1.3.6	PS.calvin cycle.aldolase	pgsc0003dmp400046329	moderately similar to ( 333) AT2G21330 | Symbols: | fructose-bisphosphate aldolase, putative | chr2:9128416-9130152 REVERSEmoderately similar to ( 345) ALFC_ORYSA Fructose-bisphosphate aldolase, chloroplast precursor (EC 4.1.2.13) (ALDP) - Oryza sativa (Rice)moderately similar to ( 345) loc_os11g07020 12011.m28744 protein fructose-bisphosphate aldolase, chloroplast precursor, putative, expressedG…
CUST_7586_PI426222305	0.413582	6.99863	1.83124	39.6609	0.368228	6.21997	16.3761	454.14	17.0205	354.033	9.08578	208.752	0.418965	7.87489	0.500804	10.8252	PGSC0003DMT400025881	Glyceraldehyde-3-phosphate dehydrogenase B subunit	chr04	Glyceraldehyde-3-phosphate dehydrogenase B subunit	PGSC0003DMP400017652	PGSC0003DMG400009992	PGSC0003DMC400017652	PGSC0003DMT400025881	1.3.4	PS.calvin cycle.GAP	pgsc0003dmp400017652	highly similar to ( 700) AT1G42970 | Symbols: GAPB | GAPB (GLYCERALDEHYDE-3-PHOSPHATE DEHYDROGENASE B SUBUNIT); glyceraldehyde-3-phosphate dehydrogenase (NADP)/ glyceraldehyde-3-phosphate dehydrogenase | chr1:16127552-16129584 FORWARDhighly similar to ( 715) G3PB_PEA Glyceraldehyde-3-phosphate dehydrogenase B, chloroplast precursor (EC 1.2.1.13) (NADP-dependent glyceraldehydephosphate dehydrogena…
CUST_43372_PI426222305	0.438366	10.7497	1.70501	37.2741	0.528539	11.6124	33.2913	984.483	40.5226	943.621	8.02605	187.908	0.416134	9.11337	0.354424	6.93489	PGSC0003DMT400032978	Ribulose bisphosphate carboxylase small chain 2C, chloroplastic	chr02	Ribulose bisphosphate carboxylase small chain 2C, chloroplastic	PGSC0003DMP400022438	PGSC0003DMG400012666	PGSC0003DMC400022438	PGSC0003DMT400032978	1.3.2	PS.calvin cycle.rubisco small subunit	pgsc0003dmp400022438	moderately similar to ( 280) AT5G38410 | Symbols: | ribulose bisphosphate carboxylase small chain 3B / RuBisCO small subunit 3B (RBCS-3B) (ATS3B) | chr5:15377501-15378306 REVERSEmoderately similar to ( 353) RBSC_SOLTU Ribulose bisphosphate carboxylase small chain 2C, chloroplast precursor (EC 4.1.1.39) (RuBisCO small subunit 2C) - Solanum tuberosum (Potato)moderately similar to ( 246) loc_os12g19…
CUST_16129_PI426222305	0.716392	6.12976	1.20408	10.3667	0.566277	4.89892	17.0875	238.831	16.7142	169.199	5.75796	70.4327	0.646983	6.13066	0.58392	4.74128	PGSC0003DMT400062138	Ribulose bisphosphate carboxylase small chain C, chloroplastic	chr02	Ribulose bisphosphate carboxylase small chain C, chloroplastic	PGSC0003DMP400041818	PGSC0003DMG400024182	PGSC0003DMC400041818	PGSC0003DMT400062138	1.3.2	PS.calvin cycle.rubisco small subunit	pgsc0003dmp400041818	moderately similar to ( 277) AT5G38420 | Symbols: | ribulose bisphosphate carboxylase small chain 2B / RuBisCO small subunit 2B (RBCS-2B) (ATS2B) | chr5:15381203-15381978 REVERSEmoderately similar to ( 354) RBS0_SOLTU Ribulose bisphosphate carboxylase small chain C, chloroplast precursor (EC 4.1.1.39) (RuBisCO small subunit C) - Solanum tuberosum (Potato)moderately similar to ( 239) loc_os12g1939…
CUST_14823_PI426222305	0.590086	6.92587	0.863205	9.7884	0.446964	5.10911	6.54839	154.667	4.70173	60.3435	2.83284	55.7784	0.746761	10.19	0.559269	6.42873	PGSC0003DMT400033273	PTAC14	chr12	PTAC14	PGSC0003DMP400022640	PGSC0003DMG400012780	PGSC0003DMC400022640	PGSC0003DMT400033273	1.3.13	PS.calvin cycle.rubisco interacting	pgsc0003dmp400022640	weakly similar to ( 134) AT4G20130 | Symbols: PTAC14 | PTAC14 (PLASTID TRANSCRIPTIONALLY ACTIVE14) | chr4:10878914-10881697 FORWARDweakly similar to ( 128) loc_os05g50980 12005.m09165 protein SET domain containing protein, expressed PGSC0003DMT400033273
CUST_10225_PI426222305	0.807966	11.7203	0.8623	11.3629	0.435908	5.92484	11.955	254.785	8.34798	122.038	3.92628	64.7789	0.494028	7.08293	0.614547	8.0414	PGSC0003DMT400028915	NADP-dependent glyceraldehyde-3-phosphate dehydrogenase	chr07	NADP-dependent glyceraldehyde-3-phosphate dehydrogenase	PGSC0003DMP400019654	PGSC0003DMG400011132	PGSC0003DMC400019654	PGSC0003DMT400028915	1.3.4	PS.calvin cycle.GAP	pgsc0003dmp400019654	highly similar to ( 924) AT2G24270 | Symbols: ALDH11A3 | ALDH11A3; 3-chloroallyl aldehyde dehydrogenase/ glyceraldehyde-3-phosphate dehydrogenase (NADP) | chr2:10327325-10329601 REVERSEhighly similar to ( 972) GAPN_NICPL NADP-dependent glyceraldehyde-3-phosphate dehydrogenase (EC 1.2.1.9) (Non-phosphorylating glyceraldehyde 3-phosphate dehydrogenase) (Glyceraldehyde-3-phosphate dehydrogenase [NAD…
CUST_42721_PI426222305	0.672666	25.1965	2.00273	77.7382	0.486446	20.3148	8.42885	488.783	8.74346	370.584	2.50514	115.046	0.23791	10.5296	0.535315	22.4791	PGSC0003DMT400052463	Fructose-1,6-bisphosphatase	chr09	Fructose-1,6-bisphosphatase	PGSC0003DMP400035369	PGSC0003DMG400020363	PGSC0003DMC400035369	PGSC0003DMT400052463	1.3.7	PS.calvin cycle.FBPase	pgsc0003dmp400035369	highly similar to ( 617) AT3G54050 | Symbols: | fructose-1,6-bisphosphatase, putative / D-fructose-1,6-bisphosphate 1-phosphohydrolase, putative / FBPase, putative | chr3:20016951-20018527 FORWARDhighly similar to ( 620) F16P1_BRANA Fructose-1,6-bisphosphatase, chloroplast precursor (EC 3.1.3.11) (D-fructose-1,6-bisphosphate 1-phosphohydrolase) (FBPase) - Brassica napus (Rape)highly similar to ( …
CUST_34574_PI426222305	0.468087	37.1032	1.80492	129.702	0.300857	21.0654	12.4855	1254.34	11.3397	937.866	3.02204	236.021	0.403321	29.9956	0.366692	25.3602	PGSC0003DMT400050381	Ribulose bisphosphate carboxylase small chain 1, chloroplastic	chr03	Ribulose bisphosphate carboxylase small chain 1, chloroplastic	PGSC0003DMP400034002	PGSC0003DMG400019584	PGSC0003DMC400034002	PGSC0003DMT400050381	1.3.2	PS.calvin cycle.rubisco small subunit	pgsc0003dmp400034002	moderately similar to ( 272) AT5G38410 | Symbols: | ribulose bisphosphate carboxylase small chain 3B / RuBisCO small subunit 3B (RBCS-3B) (ATS3B) | chr5:15377501-15378306 REVERSEmoderately similar to ( 346) RBS1_SOLTU Ribulose bisphosphate carboxylase small chain 1, chloroplast precursor (EC 4.1.1.39) (RuBisCO small subunit 1) - Solanum tuberosum (Potato)moderately similar to ( 240) loc_os12g1939…	GO:0005634;GO:0005618;GO:0048046;GO:0009941;GO:0010287;GO:0009535;GO:0010319	GO:0005524;GO:0043531;GO:0046863	GO:0009409;GO:0042742;GO:0009416;GO:0050790
CUST_33628_PI426222305	0.582864	38.83	1.79726	126.587	0.33642	23.9509	14.6222	1316.67	13.4884	976.21	3.74488	278.796	0.36976	27.1631	0.252611	17.4264	PGSC0003DMT400067907	Ribulose bisphosphate carboxylase small chain 2B, chloroplastic	chr02	Ribulose bisphosphate carboxylase small chain 2B, chloroplastic	PGSC0003DMP400045853	PGSC0003DMG400026409	PGSC0003DMC400045853	PGSC0003DMT400067907	1.3.2	PS.calvin cycle.rubisco small subunit	pgsc0003dmp400045853	moderately similar to ( 273) AT5G38410 | Symbols: | ribulose bisphosphate carboxylase small chain 3B / RuBisCO small subunit 3B (RBCS-3B) (ATS3B) | chr5:15377501-15378306 REVERSEmoderately similar to ( 338) RBSB_SOLTU Ribulose bisphosphate carboxylase small chain 2B, chloroplast precursor (EC 4.1.1.39) (RuBisCO small subunit 2B) - Solanum tuberosum (Potato)moderately similar to ( 242) loc_os12g19…		GO:0016857	GO:0005975
CUST_20076_PI426222305	0.361443	74.4835	1.98575	365.47	0.399431	79.5775	7.93094	2325.12	6.5116	1496.41	2.38237	549.362	0.427478	94.5964	0.587323	109.566	PGSC0003DMT400049256	Ribulose bisphosphate carboxylase/oxygenase activase, chloroplastic	chr10	Ribulose bisphosphate carboxylase/oxygenase activase, chloroplastic	PGSC0003DMP400033265	PGSC0003DMG400019149	PGSC0003DMC400033265	PGSC0003DMT400049256	1.3.13	PS.calvin cycle.rubisco interacting	pgsc0003dmp400033265	highly similar to ( 701) AT2G39730 | Symbols: RCA | RCA (RUBISCO ACTIVASE); ADP binding / ATP binding / enzyme regulator/ ribulose-1,5-bisphosphate carboxylase/oxygenase activator | chr2:16571174-16573345 REVERSEhighly similar to ( 820) RCA2_TOBAC Ribulose bisphosphate carboxylase/oxygenase activase 2, chloroplast precursor (RuBisCO activase 2) (RA 2) - Nicotiana tabacum (Common tobacco)highly si…	GO:0048046;GO:0009941;GO:0009570;GO:0009535;GO:0010319	GO:0046872;GO:0004750	GO:0009409;GO:0006098;GO:0009793;GO:0042742;GO:0009624;GO:0019253
CUST_50899_PI426222305	0.818983	4.81369	0.973804	5.82651	0.709102	4.52538	4.39282	54.8186	3.71355	28.0557	1.64306	15.6736	0.828443	5.88513	0.942001	6.08108	PGSC0003DMT400011335	Triosephosphate isomerase, chloroplastic	chr10	Triosephosphate isomerase, chloroplastic	PGSC0003DMP400007881	PGSC0003DMG400004436	PGSC0003DMC400007881	PGSC0003DMT400011335	1.3.5	PS.calvin cycle.TPI	pgsc0003dmp400007881	moderately similar to ( 467) AT2G21170 | Symbols: TIM | TIM (TRIOSEPHOSPHATE ISOMERASE); catalytic/ triose-phosphate isomerase | chr2:9071047-9073106 REVERSEmoderately similar to ( 495) TPIC_SPIOL Triosephosphate isomerase, chloroplast precursor (EC 5.3.1.1) (TIM) (Triose-phosphate isomerase) - Spinacia oleracea (Spinach)moderately similar to ( 456) loc_os09g36450 12009.m060049 protein triosephos…	GO:0009570	GO:0005488;GO:0042132	GO:0005975;GO:0016556
CUST_41323_PI426222305	0.535938	13.5161	1.43455	35.2726	0.4147	8.49267	21.0442	637.868	13.0588	295.783	1.85542	163.592	0.408318	7.86594	0.92614	16.9013	PGSC0003DMT400008102	Fructose-bisphosphate aldolase	chr01	Fructose-bisphosphate aldolase	PGSC0003DMP400005639	PGSC0003DMG400003123	PGSC0003DMC400005639	PGSC0003DMT400008102	1.3.6	PS.calvin cycle.aldolase	pgsc0003dmp400005639	highly similar to ( 638) AT4G38970 | Symbols: | fructose-bisphosphate aldolase, putative | chr4:18163769-18165659 REVERSEhighly similar to ( 611) ALFC_ORYSA Fructose-bisphosphate aldolase, chloroplast precursor (EC 4.1.2.13) (ALDP) - Oryza sativa (Rice)highly similar to ( 611) loc_os11g07020 12011.m28744 protein fructose-bisphosphate aldolase, chloroplast precursor, putative, expressedGlycolytic …
CUST_41317_PI426222305	0.446161	4.64828	1.48049	24.2801	0.404948	3.95413	14.6126	268.741	12.8842	204.351	1.62615	36.7968	0.753184	10.4774	0.736031	9.1078	PGSC0003DMT400008103	Fructose-bisphosphate aldolase	chr01	Fructose-bisphosphate aldolase	PGSC0003DMP400005640	PGSC0003DMG400003123	PGSC0003DMC400005640	PGSC0003DMT400008103	1.3.6	PS.calvin cycle.aldolase	pgsc0003dmp400005640	highly similar to ( 684) AT4G38970 | Symbols: | fructose-bisphosphate aldolase, putative | chr4:18163769-18165659 REVERSEhighly similar to ( 661) ALFC_ORYSA Fructose-bisphosphate aldolase, chloroplast precursor (EC 4.1.2.13) (ALDP) - Oryza sativa (Rice)highly similar to ( 661) loc_os11g07020 12011.m28744 protein fructose-bisphosphate aldolase, chloroplast precursor, putative, expressedGlycolytic …
CUST_24915_PI426222305	0.889224	16.7857	1.3622	35.7158	0.306704	4.70707	19.894	519.923	21.5993	435.246	3.27097	68.7178	0.369284	6.99925	0.377051	6.12356	PGSC0003DMT400024090	Phosphoribulokinase	chr08	Phosphoribulokinase	PGSC0003DMP400016435	PGSC0003DMG400009317	PGSC0003DMC400016435	PGSC0003DMT400024090	1.3.12	PS.calvin cycle.PRK	pgsc0003dmp400016435	highly similar to ( 688) AT1G32060 | Symbols: PRK | PRK (PHOSPHORIBULOKINASE); ATP binding / phosphoribulokinase/ protein binding | chr1:11532668-11534406 FORWARDhighly similar to ( 709) KPPR_WHEAT Phosphoribulokinase, chloroplast precursor (EC 2.7.1.19) (Phosphopentokinase) (PRKase) (PRK) - Triticum aestivum (Wheat)highly similar to ( 709) loc_os02g47020 12002.m09738 protein phosphoribulokinase,…
CUST_14960_PI426222305	1.00824	319.768	1.08739	318.223	0.859237	286.347	2.57109	1251.66	3.06998	1081.13	1.30957	517.851	0.917642	313.471	0.848372	268.391	PGSC0003DMT400056870	Phosphoglycerate kinase	chr10	Phosphoglycerate kinase	PGSC0003DMP400038230	PGSC0003DMG400022118	PGSC0003DMC400038230	PGSC0003DMT400056870	1.3.3	PS.calvin cycle.phosphoglycerate kinase	pgsc0003dmp400038230	highly similar to ( 716) AT1G56190 | Symbols: | phosphoglycerate kinase, putative | chr1:21028622-21030454 FORWARDhighly similar to ( 806) PGKH_TOBAC Phosphoglycerate kinase, chloroplast precursor (EC 2.7.2.3) - Nicotiana tabacum (Common tobacco)highly similar to ( 690) loc_os05g41640 12005.m08338 protein phosphoglycerate kinase, chloroplast precursor, putative, expressedpgk Phosphoglycerate_kina…	GO:0016020;GO:0005739;GO:0005634;GO:0005829;GO:0005618;GO:0048046;GO:0009941;GO:0009570;GO:0010319;GO:0009579	GO:0005524;GO:0004618	GO:0009409;GO:0016310;GO:0046686;GO:0006096;GO:0019253
CUST_6561_PI426222305	0.774331	41.4863	1.3524	65.6481	0.82016	44.764	3.45075	346.123	2.69089	157.305	2.43876	173.831	0.486523	28.2556	0.64359	34.2843	PGSC0003DMT400036878	Ribulose bisphosphate carboxylase/oxygenase activase, chloroplast	chr03	Ribulose bisphosphate carboxylase/oxygenase activase, chloroplast	PGSC0003DMP400025023	PGSC0003DMG400014221	PGSC0003DMC400025023	PGSC0003DMT400036878	1.3.13	PS.calvin cycle.rubisco interacting	pgsc0003dmp400025023	moderately similar to ( 303) AT1G73110 | Symbols: | ribulose bisphosphate carboxylase/oxygenase activase, putative / RuBisCO activase, putative | chr1:27494344-27496844 REVERSEweakly similar to ( 177) RCA_ORYSA Ribulose bisphosphate carboxylase/oxygenase activase, chloroplast precursor (RuBisCO activase) (RA) - Oryza sativa (Rice)moderately similar to ( 297) loc_os04g56320 12004.m10522 protein ri…
CUST_6468_PI426222305	0.802063	41.6107	1.18154	55.7461	0.922004	49.2347	3.46598	322.699	2.97407	169.188	2.3698	155.878	0.538927	30.246	0.532286	27.4003	PGSC0003DMT400036879	Ribulose bisphosphate carboxylase/oxygenase activase, chloroplast	chr03	Ribulose bisphosphate carboxylase/oxygenase activase, chloroplast	PGSC0003DMP400025024	PGSC0003DMG400014221	PGSC0003DMC400025024	PGSC0003DMT400036879	1.3.13	PS.calvin cycle.rubisco interacting	pgsc0003dmp400025024	moderately similar to ( 446) AT1G73110 | Symbols: | ribulose bisphosphate carboxylase/oxygenase activase, putative / RuBisCO activase, putative | chr1:27494344-27496844 REVERSEmoderately similar to ( 285) RCA_ORYSA Ribulose bisphosphate carboxylase/oxygenase activase, chloroplast precursor (RuBisCO activase) (RA) - Oryza sativa (Rice)moderately similar to ( 449) loc_os04g56320 12004.m10522 protei…
CUST_45825_PI426222305	0.787491	13.6526	1.04226	15.2217	0.70251	11.9226	1.62068	49.1949	1.87604	35.8538	1.73313	36.9715	0.639996	11.5898	0.836904	14.0067	PGSC0003DMT400050255	Ribulose-phosphate 3-epimerase, chloroplastic	chr03	Ribulose-phosphate 3-epimerase, chloroplastic	PGSC0003DMP400033924	PGSC0003DMG400019521	PGSC0003DMC400033924	PGSC0003DMT400050255	1.3.11	PS.calvin cycle.RPE	pgsc0003dmp400033924	moderately similar to ( 430) AT5G61410 | Symbols: RPE | RPE; catalytic/ ribulose-phosphate 3-epimerase | chr5:24684085-24685836 REVERSEmoderately similar to ( 494) RPE_SOLTU Ribulose-phosphate 3-epimerase, chloroplast precursor (EC 5.1.3.1) (Pentose-5-phosphate 3-epimerase) (PPE) (RPE) (R5P3E) (Fragment) - Solanum tuberosum (Potato)moderately similar to ( 416) loc_os03g07300 12003.m101203 protein…
CUST_30449_PI426222305	0.486086	4.95097	2.05475	29.0089	0.809921	9.19254	10.9488	421.16	3.33574	45.834	4.43391	163.618	0.44286	5.05976	0.564234	5.71926	PGSC0003DMT400069750	Chloroplast sedoheptulose-1,7-bisphosphatase	chr05	Chloroplast sedoheptulose-1,7-bisphosphatase	PGSC0003DMP400047117	PGSC0003DMG400027125	PGSC0003DMC400047117	PGSC0003DMT400069750	1.3.9	PS.calvin cycle.seduheptulose bisphosphatase	pgsc0003dmp400047117	highly similar to ( 604) AT3G55800 | Symbols: SBPASE | SBPASE (sedoheptulose-bisphosphatase); phosphoric ester hydrolase/ sedoheptulose-bisphosphatase | chr3:20709640-20711421 FORWARDhighly similar to ( 622) S17P_SPIOL Sedoheptulose-1,7-bisphosphatase, chloroplast precursor (EC 3.1.3.37) (Sedoheptulose-bisphosphatase) (SBPase) (SED(1,7)P2ase) - Spinacia oleracea (Spinach)highly similar to ( 592) …
CUST_51886_PI426222305	0.903438	71.7458	1.32082	96.814	0.823818	67.9852	4.8098	588.835	4.97144	440.495	0.900502	92.4333	0.680575	60.5857	0.321147	26.7767	PGSC0003DMT400056799	Transketolase, chloroplastic	chr10	Transketolase, chloroplastic	PGSC0003DMP400038185	PGSC0003DMG400022088	PGSC0003DMC400038185	PGSC0003DMT400056799	1.3.8	PS.calvin cycle.transketolase	pgsc0003dmp400038185	nearly identical (1209) AT2G45290 | Symbols: | transketolase, putative | chr2:18672737-18675589 FORWARDnearly identical (1406) TKTC_SOLTU Transketolase, chloroplast precursor (EC 2.2.1.1) (TK) - Solanum tuberosum (Potato)nearly identical (1213) loc_os06g04270 12006.m05156 protein transketolase, chloroplast precursor, putative, expressedTktA PRK05899 PRK12753 PRK12754 Transketolase_N TPP_TK COG395…
CUST_43426_PI426222305	0.974905	4.42415	1.05468	4.40459	0.93392	4.4725	3.07021	24.9659	3.26561	23.7401	1.08567	7.16049	0.898873	4.81018	0.978061	4.18443	PGSC0003DMT400032977	Ribulose bisphosphate carboxylase small chain 2C, chloroplastic	chr02	Ribulose bisphosphate carboxylase small chain 2C, chloroplastic	PGSC0003DMP400022437	PGSC0003DMG400012666	PGSC0003DMC400022437	PGSC0003DMT400032977	1.3.2	PS.calvin cycle.rubisco small subunit	pgsc0003dmp400022437	moderately similar to ( 274) AT5G38410 | Symbols: | ribulose bisphosphate carboxylase small chain 3B / RuBisCO small subunit 3B (RBCS-3B) (ATS3B) | chr5:15377501-15378306 REVERSEmoderately similar to ( 336) RBSC_SOLTU Ribulose bisphosphate carboxylase small chain 2C, chloroplast precursor (EC 4.1.1.39) (RuBisCO small subunit 2C) - Solanum tuberosum (Potato)moderately similar to ( 244) loc_os12g19…
CUST_43423_PI426222305	0.9678	4.20128	1.09816	4.81249	0.925987	4.38543	2.44918	19.6947	2.85391	20.7793	0.902079	5.49821	1.05554	5.78583	0.970934	4.25353	PGSC0003DMT400032975	Ribulose bisphosphate carboxylase small chain 2C, chloroplastic	chr02	Ribulose bisphosphate carboxylase small chain 2C, chloroplastic	PGSC0003DMP400022435	PGSC0003DMG400012666	PGSC0003DMC400022435	PGSC0003DMT400032975	1.3.2	PS.calvin cycle.rubisco small subunit	pgsc0003dmp400022435	moderately similar to ( 280) AT5G38410 | Symbols: | ribulose bisphosphate carboxylase small chain 3B / RuBisCO small subunit 3B (RBCS-3B) (ATS3B) | chr5:15377501-15378306 REVERSEmoderately similar to ( 353) RBSC_SOLTU Ribulose bisphosphate carboxylase small chain 2C, chloroplast precursor (EC 4.1.1.39) (RuBisCO small subunit 2C) - Solanum tuberosum (Potato)moderately similar to ( 246) loc_os12g19…
CUST_13719_PI426222305	0.907484	123.66	1.02265	125.948	1.04994	151.588	3.36482	696.933	2.68415	403.383	1.16809	192.159	0.68856	99.9478	0.679957	95.6632	PGSC0003DMT400018062	Transketolase 1	chr05	Transketolase 1	PGSC0003DMP400012430	PGSC0003DMG400007019	PGSC0003DMC400012430	PGSC0003DMT400018062	1.3.8	PS.calvin cycle.transketolase	pgsc0003dmp400012430	nearly identical (1177) AT2G45290 | Symbols: | transketolase, putative | chr2:18672737-18675589 FORWARDnearly identical (1262) TKTC_SOLTU Transketolase, chloroplast precursor (EC 2.2.1.1) (TK) - Solanum tuberosum (Potato)nearly identical (1202) loc_os06g04270 12006.m05156 protein transketolase, chloroplast precursor, putative, expressedTktA PRK05899 PRK12753 PRK12754 Transketolase_N TPP_TK COG395…
CUST_45793_PI426222305	0.961938	444.23	1.16644	505.802	0.885416	428.46	1.39266	994.17	1.4924	769.786	0.98859	573.242	0.839646	424.528	0.998988	470.029	PGSC0003DMT400050256	Ribulose-phosphate 3-epimerase, chloroplastic	chr03	Ribulose-phosphate 3-epimerase, chloroplastic	PGSC0003DMP400033925	PGSC0003DMG400019521	PGSC0003DMC400033925	PGSC0003DMT400050256	1.3.11	PS.calvin cycle.RPE	pgsc0003dmp400033925	moderately similar to ( 450) AT5G61410 | Symbols: RPE | RPE; catalytic/ ribulose-phosphate 3-epimerase | chr5:24684085-24685836 REVERSEhighly similar to ( 518) RPE_SOLTU Ribulose-phosphate 3-epimerase, chloroplast precursor (EC 5.1.3.1) (Pentose-5-phosphate 3-epimerase) (PPE) (RPE) (R5P3E) (Fragment) - Solanum tuberosum (Potato)moderately similar to ( 432) loc_os03g07300 12003.m101203 protein rib…
CUST_36776_PI426222305	1.05006	76.3726	1.17005	78.5792	0.929327	70.1482	1.83177	205.467	1.89728	153.092	0.981667	88.8528	0.713487	56.0313	0.903486	65.4401	PGSC0003DMT400004041	Triosephosphate isomerase, chloroplastic	chr01	Triosephosphate isomerase, chloroplastic	PGSC0003DMP400002888	PGSC0003DMG400001595	PGSC0003DMC400002888	PGSC0003DMT400004041	1.3.5	PS.calvin cycle.TPI	pgsc0003dmp400002888	moderately similar to ( 400) AT2G21170 | Symbols: TIM | TIM (TRIOSEPHOSPHATE ISOMERASE); catalytic/ triose-phosphate isomerase | chr2:9071047-9073106 REVERSEmoderately similar to ( 441) TPIC_SPIOL Triosephosphate isomerase, chloroplast precursor (EC 5.3.1.1) (TIM) (Triose-phosphate isomerase) - Spinacia oleracea (Spinach)moderately similar to ( 377) loc_os09g36450 12009.m060049 protein triosephos…
CUST_37050_PI426222305	0.974337	455.127	1.33002	605.396	1.01157	491.813	1.3526	969.977	1.83222	949.755	1.31604	755.804	0.77959	408.466	0.943477	440.146	PGSC0003DMT400061949	Fructose-1,6-bisphosphatase, cytosolic	chr04	Fructose-1,6-bisphosphatase, cytosolic	PGSC0003DMP400041705	PGSC0003DMG400024109	PGSC0003DMC400041705	PGSC0003DMT400061949	1.3.7	PS.calvin cycle.FBPase	pgsc0003dmp400041705	highly similar to ( 578) AT1G43670 | Symbols: | fructose-1,6-bisphosphatase, putative / D-fructose-1,6-bisphosphate 1-phosphohydrolase, putative / FBPase, putative | chr1:16468184-16470347 FORWARDhighly similar to ( 653) F16P2_SOLTU Fructose-1,6-bisphosphatase, cytosolic (EC 3.1.3.11) (D-fructose-1,6-bisphosphate 1-phosphohydrolase) (FBPase) (CY-F1) - Solanum tuberosum (Potato)highly similar to (…
CUST_37028_PI426222305	0.979387	1110.42	1.32189	1438.28	0.990405	1173.67	1.32628	2341.41	1.80929	2302.65	1.27495	1790.17	0.742224	950.846	0.982153	1124.18	PGSC0003DMT400061952	Fructose-1,6-bisphosphatase, cytosolic	chr04	Fructose-1,6-bisphosphatase, cytosolic	PGSC0003DMP400041708	PGSC0003DMG400024109	PGSC0003DMC400041708	PGSC0003DMT400061952	1.3.7	PS.calvin cycle.FBPase	pgsc0003dmp400041708	weakly similar to ( 178) AT1G43670 | Symbols: | fructose-1,6-bisphosphatase, putative / D-fructose-1,6-bisphosphate 1-phosphohydrolase, putative / FBPase, putative | chr1:16468184-16470347 FORWARDweakly similar to ( 191) F16P2_SOLTU Fructose-1,6-bisphosphatase, cytosolic (EC 3.1.3.11) (D-fructose-1,6-bisphosphate 1-phosphohydrolase) (FBPase) (CY-F1) - Solanum tuberosum (Potato)weakly similar to (…
CUST_37033_PI426222305	0.99498	1080.69	1.32386	1378.1	0.96792	1100.11	1.3529	2263.89	1.78753	2178.57	1.22873	1686.4	0.739111	915.838	0.920282	1010.51	PGSC0003DMT400061951	Fructose-1,6-bisphosphatase, cytosolic	chr04	Fructose-1,6-bisphosphatase, cytosolic	PGSC0003DMP400041707	PGSC0003DMG400024109	PGSC0003DMC400041707	PGSC0003DMT400061951	1.3.7	PS.calvin cycle.FBPase	pgsc0003dmp400041707	highly similar to ( 595) AT1G43670 | Symbols: | fructose-1,6-bisphosphatase, putative / D-fructose-1,6-bisphosphate 1-phosphohydrolase, putative / FBPase, putative | chr1:16468184-16470347 FORWARDhighly similar to ( 673) F16P2_SOLTU Fructose-1,6-bisphosphatase, cytosolic (EC 3.1.3.11) (D-fructose-1,6-bisphosphate 1-phosphohydrolase) (FBPase) (CY-F1) - Solanum tuberosum (Potato)highly similar to (…
CUST_30849_PI426222305	1.0132	3137.42	1.33901	3846.56	0.974627	3151.67	1.35622	6511.31	1.60471	5540.2	1.02199	3976.15	0.564697	1900.24	0.5324	1648.64	PGSC0003DMT400018798	CP12	chr06	CP12	PGSC0003DMP400012908	PGSC0003DMG400007286	PGSC0003DMC400012908	PGSC0003DMT400018798	1.3	PS.calvin cycle	pgsc0003dmp400012908	weakly similar to ( 108) AT3G62410 | Symbols: CP12-2, CP12 | CP12-2; protein binding | chr3:23091006-23091401 FORWARDweakly similar to ( 102) loc_os03g19380 12003.m07355 protein CP12-2, putative, expressedCP12 PGSC0003DMT400018798
CUST_28757_PI426222305	1.12016	208.459	0.80036	135.958	1.15166	226.009	1.27532	372.39	2.02165	427.169	1.08251	244.112	0.71601	141.228	0.733932	140.842	PGSC0003DMT400083063	Ribulose bisphosphate carboxylase large chain	chr06	Ribulose bisphosphate carboxylase large chain	PGSC0003DMP400055787	PGSC0003DMG400033037	PGSC0003DMC400055787	PGSC0003DMT400083063	1.3.1	PS.calvin cycle.rubisco large subunit	pgsc0003dmp400055787	highly similar to ( 733) ATCG00490 | Symbols: RBCL | large subunit of RUBISCO. Protein is tyrosine-phosphorylated and its phosphorylation state is modulated in response to ABA in Arabidopsis thaliana seeds. | chrC:54958-56397 FORWARDhighly similar to ( 768) RBL_TOBAC Ribulose bisphosphate carboxylase large chain precursor (EC 4.1.1.39) (RuBisCO large subunit) - Nicotiana tabacum (Common tobacco)h…
CUST_5864_PI426222305	0.962148	3829.93	1.07039	3944.54	1.12302	4666.57	1.24929	7783.66	1.2228	5412.61	0.581147	2955.38	0.807523	3480.08	0.690718	2789.5	PGSC0003DMT400006895	Fructose-bisphosphate aldolase	chr09	Fructose-bisphosphate aldolase	PGSC0003DMP400004787	PGSC0003DMG400002675	PGSC0003DMC400004787	PGSC0003DMT400006895	1.3.6	PS.calvin cycle.aldolase	pgsc0003dmp400004787	moderately similar to ( 459) AT2G36460 | Symbols: | fructose-bisphosphate aldolase, putative | chr2:15296929-15297732 REVERSEmoderately similar to ( 443) ALF2_PEA Fructose-bisphosphate aldolase, cytoplasmic isozyme 2 (EC 4.1.2.13) - Pisum sativum (Garden pea)moderately similar to ( 444) loc_os01g67860 12001.m12890 protein fructose-bisphosphate aldolase cytoplasmic isozyme, putative, expressedGlyc…
CUST_5695_PI426222305	0.982554	245.825	1.06676	252.886	1.1455	298.718	1.33632	538.147	1.24167	346.596	0.672182	208.956	0.756511	206.748	0.662083	169.244	PGSC0003DMT400006894	Fructose-bisphosphate aldolase	chr09	Fructose-bisphosphate aldolase	PGSC0003DMP400004786	PGSC0003DMG400002675	PGSC0003DMC400004786	PGSC0003DMT400006894	1.3.6	PS.calvin cycle.aldolase	pgsc0003dmp400004786	highly similar to ( 604) AT2G36460 | Symbols: | fructose-bisphosphate aldolase, putative | chr2:15296929-15297732 REVERSEhighly similar to ( 600) ALF_ORYSA Fructose-bisphosphate aldolase cytoplasmic isozyme (EC 4.1.2.13) (Gravity-specific protein GSC 233) - Oryza sativa (Rice)highly similar to ( 600) loc_os05g33380 12005.m07570 protein fructose-bisphosphate aldolase cytoplasmic isozyme, putative,…
CUST_45203_PI426222305	1.01581	130.261	1.0604	127.065	1.15641	156.319	1.34351	272.643	1.27989	182.282	0.87471	136.214	0.808805	111.42	0.925658	118.375	PGSC0003DMT400027987	Fructose-1,6-bisphosphatase, cytosolic	chr12	Fructose-1,6-bisphosphatase, cytosolic	PGSC0003DMP400019066	PGSC0003DMG400010788	PGSC0003DMC400019066	PGSC0003DMT400027987	1.3.7	PS.calvin cycle.FBPase	pgsc0003dmp400019066	highly similar to ( 593) AT1G43670 | Symbols: | fructose-1,6-bisphosphatase, putative / D-fructose-1,6-bisphosphate 1-phosphohydrolase, putative / FBPase, putative | chr1:16468184-16470347 FORWARDhighly similar to ( 629) F16P2_SOLTU Fructose-1,6-bisphosphatase, cytosolic (EC 3.1.3.11) (D-fructose-1,6-bisphosphate 1-phosphohydrolase) (FBPase) (CY-F1) - Solanum tuberosum (Potato)highly similar to (…	GO:0009570	GO:0005515;GO:0030785;GO:0016279	GO:0018023
CUST_15146_PI426222305	0.945829	554.725	1.0185	552.449	1.03373	635.004	1.13282	1031.91	1.25498	819.11	0.792927	584.4	0.82624	525.676	0.974041	581.558	PGSC0003DMT400056871	Phosphoglycerate kinase	chr07	Phosphoglycerate kinase	PGSC0003DMP400038231	PGSC0003DMG400022119	PGSC0003DMC400038231	PGSC0003DMT400056871	1.3.3	PS.calvin cycle.phosphoglycerate kinase	pgsc0003dmp400038231	highly similar to ( 666) AT1G79550 | Symbols: PGK | PGK (PHOSPHOGLYCERATE KINASE); phosphoglycerate kinase | chr1:29924347-29926295 REVERSEhighly similar to ( 710) PGKY_TOBAC Phosphoglycerate kinase, cytosolic (EC 2.7.2.3) - Nicotiana tabacum (Common tobacco)highly similar to ( 635) loc_os05g41640 12005.m08338 protein phosphoglycerate kinase, chloroplast precursor, putative, expressedpgk Phosphog…
CUST_2415_PI426222305	0.929268	2572.83	1.05294	2702.19	1.04023	3020.66	1.01175	4355.27	1.16564	3595.74	0.709156	2495.99	0.894934	2715.59	0.951661	2648.77	PGSC0003DMT400072631	Fructose-bisphosphate aldolase	chr10	Fructose-bisphosphate aldolase	PGSC0003DMP400049130	PGSC0003DMG400028261	PGSC0003DMC400049130	PGSC0003DMT400072631	1.3.6	PS.calvin cycle.aldolase	pgsc0003dmp400049130	moderately similar to ( 458) AT3G52930 | Symbols: | fructose-bisphosphate aldolase, putative | chr3:19627383-19628874 REVERSEmoderately similar to ( 445) ALF_ORYSA Fructose-bisphosphate aldolase cytoplasmic isozyme (EC 4.1.2.13) (Gravity-specific protein GSC 233) - Oryza sativa (Rice)moderately similar to ( 445) loc_os05g33380 12005.m07570 protein fructose-bisphosphate aldolase cytoplasmic isozym…	GO:0009507	GO:0005515;GO:0030785	GO:0032259
CUST_5360_PI426222305	1.14052	1481.88	1.27401	1589.26	1.04623	1418.7	0.662858	1336.08	0.842281	1210.91	1.08368	1764.36	0.966737	1350.58	1.15463	1506.5	PGSC0003DMT400009126	Fructose-bisphosphate aldolase	chr09	Fructose-bisphosphate aldolase	PGSC0003DMP400006333	PGSC0003DMG400003548	PGSC0003DMC400006333	PGSC0003DMT400009126	1.3.6	PS.calvin cycle.aldolase	pgsc0003dmp400006333	highly similar to ( 501) AT4G38970 | Symbols: | fructose-bisphosphate aldolase, putative | chr4:18163769-18165659 REVERSEmoderately similar to ( 473) ALFC_PEA Fructose-bisphosphate aldolase 1, chloroplast precursor (EC 4.1.2.13) (Fragment) - Pisum sativum (Garden pea)moderately similar to ( 436) loc_os01g02880 12001.m06927 protein fructose-bisphosphate aldolase, chloroplast precursor, putative, e…	GO:0005739;GO:0009534;GO:0010287	GO:0004332	GO:0006098;GO:0046686;GO:0009651;GO:0006096;GO:0006979
CUST_5336_PI426222305	1.09316	10130.2	1.44967	12633.6	1.04227	10060	0.55812	7968.9	0.744731	7667.54	1.07234	12187.5	0.917707	9339.23	1.24822	11586.8	PGSC0003DMT400009127	Fructose-bisphosphate aldolase	chr02	Fructose-bisphosphate aldolase	PGSC0003DMP400006334	PGSC0003DMG400003548	PGSC0003DMC400006334	PGSC0003DMT400009127	1.3.6	PS.calvin cycle.aldolase	pgsc0003dmp400006334	highly similar to ( 672) AT4G38970 | Symbols: | fructose-bisphosphate aldolase, putative | chr4:18163769-18165659 REVERSEhighly similar to ( 641) ALFC_ORYSA Fructose-bisphosphate aldolase, chloroplast precursor (EC 4.1.2.13) (ALDP) - Oryza sativa (Rice)highly similar to ( 641) loc_os11g07020 12011.m28744 protein fructose-bisphosphate aldolase, chloroplast precursor, putative, expressedGlycolytic …
CUST_11146_PI426222305	1.06437	335.637	1.13011	327.848	1.03991	339.739	0.853344	426.166	0.909184	319.021	0.953952	367.008	0.868007	297.913	1.07901	341.464	PGSC0003DMT400078520	Fructose-bisphosphate aldolase	chr04	Fructose-bisphosphate aldolase	PGSC0003DMP400053207	PGSC0003DMG400030565	PGSC0003DMC400053207	PGSC0003DMT400078520	1.3.6	PS.calvin cycle.aldolase	pgsc0003dmp400053207	highly similar to ( 644) AT2G01140 | Symbols: | fructose-bisphosphate aldolase, putative | chr2:95006-96491 REVERSEhighly similar to ( 588) ALFC_PEA Fructose-bisphosphate aldolase 1, chloroplast precursor (EC 4.1.2.13) (Fragment) - Pisum sativum (Garden pea)highly similar to ( 634) loc_os01g02880 12001.m06927 protein fructose-bisphosphate aldolase, chloroplast precursor, putative, expressedGlycol…	GO:0009507	GO:0004497;GO:0000287;GO:0016984	GO:0055114;GO:0009853;GO:0019253
