# Supplementary material for: Light Regulation of Chlorophyll and Glycoalkaloid Biosynthesis During Tuber Greening of Potato S. tuberosum
Source: Front Plant Sci. 2020 Jun 30;11:753. doi: 10.3389/fpls.2020.00753 (PMC7372192; doi:10.3389/fpls.2020.00753)
Supplement: TABLE S17 — List of BIN27.3_transcription factor genes that are more than 2-fold up-regulated in at least one of the 6 light conditions when compared to the dark control. Eighteen transcription factor genes that are consistently and progressively up-regulated at 6 h and 24 h are indicated in red text and are also shown in Table 1. Seven transcription factor genes that are up-regulated at 6 h and were down at 24 h are indicated in blue text and are also shown in Table 2. [file Table_4.XLSX]

## Sheet: Table S17 BIN27_Up_1732
Flags are Present or Marginal	WL6h	B6h	R6h	WL24h	B24h	R24h	PrimaryAccession	UniRef based putative functional annotation	Chromosome	putative function	peptide ID	gene ID	CDS ID	transcript ID	MpMan bin	MapMan name	MapMan pep	MapMan description	GO: CC	GO: MF	GO: BP
CUST_25692_PI426222305	86.7492	114.03	49.0376	27.0136	34.5248	47.7238	PGSC0003DMT400029402	Pseudo-response regulator 9	chr10	Pseudo-response regulator 9	PGSC0003DMP400020015	PGSC0003DMG402011297	PGSC0003DMC400020015	PGSC0003DMT400029402	27.3.66	RNA.regulation of transcription.Psudo ARR transcription factor family	pgsc0003dmp400020015	moderately similar to ( 239) AT5G24470 | Symbols: APRR5, PRR5 | APRR5 (ARABIDOPSIS PSEUDO-RESPONSE REGULATOR 5); transcription regulator/ two-component response regulator | chr5:8356204-8358873 REVERSEmoderately similar to ( 254) PRR95_ORYSA Two-component response regulator-like PRR95 (Pseudo-response regulator 95) (OsPRR95) - Oryza sativa (Rice)moderately similar to ( 254) loc_os09g36220 12009.m…
CUST_40870_PI426222305	66.5224	72.3242	25.6873	22.509	24.4772	27.1392	PGSC0003DMT400053573	Transcription factor HY5	chr08	Transcription factor HY5	PGSC0003DMP400036123	PGSC0003DMG401020784	PGSC0003DMC400036123	PGSC0003DMT400053573	27.3.35	RNA.regulation of transcription.bZIP transcription factor family	pgsc0003dmp400036123	very weakly similar to (94.4) AT5G11260 | Symbols: HY5, TED 5 | HY5 (ELONGATED HYPOCOTYL 5); DNA binding / double-stranded DNA binding / transcription factor | chr5:3593583-3594800 REVERSEvery weakly similar to (95.1) loc_os02g10860 12002.m06384 protein transcription factor HY5, putative, expressed PGSC0003DMT400053573
CUST_33910_PI426222305	30.8515	46.8932	3.15542	51.8964	43.8966	20.547	PGSC0003DMT400068177	COL domain class transcription factor	chr06	COL domain class transcription factor	PGSC0003DMP400046063	PGSC0003DMG400026515	PGSC0003DMC400046063	PGSC0003DMT400068177	27.3.7	RNA.regulation of transcription.C2C2(Zn) CO-like, Constans-like zinc finger family	pgsc0003dmp400046063	very weakly similar to (94.4) AT3G21150 | Symbols: | zinc finger (B-box type) family protein | chr3:7412713-7413390 REVERSE PGSC0003DMT400068177
CUST_16725_PI426222305	11.6676	14.6501	3.9071	5.58335	4.01456	7.72908	PGSC0003DMT400069497	Zinc finger B-box protein	chr06	Fructokinase 2	PGSC0003DMP400046914	PGSC0003DMG400027017	PGSC0003DMC400046914	PGSC0003DMT400069497	27.3.7	RNA.regulation of transcription.C2C2(Zn) CO-like, Constans-like zinc finger family	pgsc0003dmp400046914	weakly similar to ( 115) AT1G06040 | Symbols: STO | STO (SALT TOLERANCE); DNA binding / protein binding / transcription factor/ zinc ion binding | chr1:1828662-1829659 REVERSEweakly similar to ( 101) loc_os04g41560 12004.m101716 protein salt tolerance-like protein, putative, expressed PGSC0003DMT400069497
CUST_35573_PI426222305	10.9011	11.3795	5.56258	6.73536	7.34506	9.04267	PGSC0003DMT400062232	Pseudo response regulator	chr08	Pseudo response regulator	PGSC0003DMP400041887	PGSC0003DMG400024217	PGSC0003DMC400041887	PGSC0003DMT400062232	27.3.5	RNA.regulation of transcription.ARR	pgsc0003dmp400041887	moderately similar to ( 358) AT4G18020 | Symbols: | APRR2; transcription factor/ two-component response regulator | chr4:10003991-10006682 REVERSEweakly similar to ( 105) loc_os01g13740 12001.m42936 protein myb-like DNA-binding domain, SHAQKYF class family protein, expressed PGSC0003DMT400062232	GO:0005634	GO:0003700;GO:0003677;GO:0003682;GO:0000156
CUST_34330_PI426222305	9.75115	9.69666	3.36371	8.50098	8.55588	6.07168	PGSC0003DMT400082751	Heat shock factor	chr07	Heat stress transcription factor HSFA9	PGSC0003DMP400055693	PGSC0003DMG400032793	PGSC0003DMC400055693	PGSC0003DMT400082751	27.3.23	RNA.regulation of transcription.HSF,Heat-shock transcription factor family	pgsc0003dmp400055693	weakly similar to ( 114) AT2G26150 | Symbols: ATHSFA2, HSFA2 | ATHSFA2; DNA binding / transcription factor | chr2:11136052-11137217 FORWARDweakly similar to ( 101) loc_os03g63750 12003.m11243 protein heat shock factor protein HSF8, putative, expressed PGSC0003DMT400082751
CUST_9802_PI426222305	7.61141	9.68934	4.56719	8.87221	5.74024	9.30619	PGSC0003DMT400016584	APETALA2	chr05	APETALA2	PGSC0003DMP400011493	PGSC0003DMG400006482	PGSC0003DMC400011493	PGSC0003DMT400016584	27.3.3	RNA.regulation of transcription.AP2/EREBP, APETALA2/Ethylene-responsive element binding protein family	pgsc0003dmp400011493	weakly similar to ( 198) AT4G36920 | Symbols: AP2, FLO2, FL1 | AP2 (APETALA 2); transcription factor | chr4:17400998-17403140 FORWARDvery weakly similar to (89.0) BBM1_BRANA Protein BABY BOOM 1 (BnBBM1) - Brassica napus (Rape)weakly similar to ( 199) loc_os04g55560 12004.m35488 protein AP2 domain containing protein, expressedAP2 AP2 PGSC0003DMT400016584
CUST_17542_PI426222305	6.61598	7.77647	5.41139	7.43119	4.54032	6.95399	PGSC0003DMT400001573	Pseudo-response regulator 5	chr03	Pseudo-response regulator 5	PGSC0003DMP400001175	PGSC0003DMG400000584	PGSC0003DMC400001175	PGSC0003DMT400001573	27.3.66	RNA.regulation of transcription.Psudo ARR transcription factor family	pgsc0003dmp400001175	moderately similar to ( 257) AT5G24470 | Symbols: APRR5, PRR5 | APRR5 (ARABIDOPSIS PSEUDO-RESPONSE REGULATOR 5); transcription regulator/ two-component response regulator | chr5:8356204-8358873 REVERSEmoderately similar to ( 313) PRR95_ORYSA Two-component response regulator-like PRR95 (Pseudo-response regulator 95) (OsPRR95) - Oryza sativa (Rice)moderately similar to ( 313) loc_os09g36220 12009.m…
CUST_9770_PI426222305	6.22602	8.67504	4.78586	10.4107	6.98854	9.67097	PGSC0003DMT400016585	APETALA2	chr03	APETALA2	PGSC0003DMP400011494	PGSC0003DMG400006482	PGSC0003DMC400011494	PGSC0003DMT400016585	27.3.3	RNA.regulation of transcription.AP2/EREBP, APETALA2/Ethylene-responsive element binding protein family	pgsc0003dmp400011494	moderately similar to ( 336) AT4G36920 | Symbols: AP2, FLO2, FL1 | AP2 (APETALA 2); transcription factor | chr4:17400998-17403140 FORWARDweakly similar to ( 141) BBM1_BRANA Protein BABY BOOM 1 (BnBBM1) - Brassica napus (Rape)moderately similar to ( 309) loc_os04g55560 12004.m35488 protein AP2 domain containing protein, expressedAP2 AP2 PGSC0003DMT400016585	GO:0005634	GO:0003700;GO:0003677
CUST_16700_PI426222305	6.15816	7.37795	3.27776	3.40724	3.57028	3.81357	PGSC0003DMT400069498	Fructokinase 2	chr06	Fructokinase 2	PGSC0003DMP400046915	PGSC0003DMG400027017	PGSC0003DMC400046915	PGSC0003DMT400069498	27.3.7	RNA.regulation of transcription.C2C2(Zn) CO-like, Constans-like zinc finger family	pgsc0003dmp400046915	moderately similar to ( 239) AT1G06040 | Symbols: STO | STO (SALT TOLERANCE); DNA binding / protein binding / transcription factor/ zinc ion binding | chr1:1828662-1829659 REVERSEweakly similar to ( 192) loc_os04g41560 12004.m101716 protein salt tolerance-like protein, putative, expressed PGSC0003DMT400069498	GO:0005634	GO:0003700;GO:0003677;GO:0008270
CUST_13740_PI426222305	4.67978	5.879	2.89652	4.60416	2.29774	8.11417	PGSC0003DMT400084206	TAF-3	chr05	TAF-3	PGSC0003DMP400056253	PGSC0003DMG400033876	PGSC0003DMC400056253	PGSC0003DMT400084206	27.3.35	RNA.regulation of transcription.bZIP transcription factor family	pgsc0003dmp400056253	weakly similar to ( 180) AT2G46270 | Symbols: GBF3 | GBF3 (G-BOX BINDING FACTOR 3); sequence-specific DNA binding / transcription factor | chr2:19000859-19002901 FORWARDmoderately similar to ( 244) TAF1_TOBAC Transcriptional activator TAF-1 (Fragment) - Nicotiana tabacum (Common tobacco)weakly similar to ( 128) loc_os05g49420 12005.m09012 protein G-box-binding factor 3, putative, expressedMFMR PG…
CUST_48942_PI426222305	3.53258	3.64061	3.12133	3.30751	3.02679	4.73969	PGSC0003DMT400065313	Apetala 2	chr11	Apetala 2	PGSC0003DMP400044038	PGSC0003DMG400025390	PGSC0003DMC400044038	PGSC0003DMT400065313	27.3.3	RNA.regulation of transcription.AP2/EREBP, APETALA2/Ethylene-responsive element binding protein family	pgsc0003dmp400044038	moderately similar to ( 283) AT2G28550 | Symbols: RAP2.7, TOE1 | RAP2.7 (RELATED TO AP2.7); DNA binding / transcription factor | chr2:12226444-12228251 REVERSEweakly similar to ( 144) BBM1_BRANA Protein BABY BOOM 1 (BnBBM1) - Brassica napus (Rape)moderately similar to ( 311) loc_os05g03040 12005.m27679 protein floral homeotic protein APETALA2, putative, expressedAP2 AP2 PGSC0003DMT400065313	GO:0005634	GO:0003700;GO:0003677
CUST_48928_PI426222305	3.26979	4.05969	3.25694	3.23713	2.91045	4.68632	PGSC0003DMT400065312	Apetala 2	chr11	Apetala 2	PGSC0003DMP400044037	PGSC0003DMG400025390	PGSC0003DMC400044037	PGSC0003DMT400065312	27.3.3	RNA.regulation of transcription.AP2/EREBP, APETALA2/Ethylene-responsive element binding protein family	pgsc0003dmp400044037	moderately similar to ( 291) AT2G28550 | Symbols: RAP2.7, TOE1 | RAP2.7 (RELATED TO AP2.7); DNA binding / transcription factor | chr2:12226444-12228251 REVERSEweakly similar to ( 121) BBM1_BRANA Protein BABY BOOM 1 (BnBBM1) - Brassica napus (Rape)moderately similar to ( 271) loc_os05g03040 12005.m27679 protein floral homeotic protein APETALA2, putative, expressedAP2 AP2 PGSC0003DMT400065312		GO:0003700
CUST_42774_PI426222305	2.51492	6.37257	3.03258	7.00453	3.69626	8.91607	PGSC0003DMT400002125	RAV transcription factor	chr05	RAV transcription factor	PGSC0003DMP400001547	PGSC0003DMG400000811	PGSC0003DMC400001547	PGSC0003DMT400002125	27.3.3	RNA.regulation of transcription.AP2/EREBP, APETALA2/Ethylene-responsive element binding protein family	pgsc0003dmp400001547	moderately similar to ( 381) AT1G68840 | Symbols: RAV2, RAP2.8, TEM2 | RAV2 (REGULATOR OF THE ATPASE OF THE VACUOLAR MEMBRANE); DNA binding / transcription factor/ transcription repressor | chr1:25880442-25881500 FORWARDmoderately similar to ( 337) loc_os01g49830 12001.m11168 protein DNA-binding protein RAV1, putative, expressedB3 AP2 AP2 PGSC0003DMT400002125
CUST_47863_PI426222305	2.47467	2.58159	2.98584	9.1919	6.52356	3.03297	PGSC0003DMT400062489	Auxin response factor 16	chr06	Auxin response factor 16	PGSC0003DMP400042077	PGSC0003DMG400024320	PGSC0003DMC400042077	PGSC0003DMT400062489	27.3.4	RNA.regulation of transcription.ARF, Auxin Response Factor family	pgsc0003dmp400042077	highly similar to ( 639) AT4G30080 | Symbols: ARF16 | ARF16 (AUXIN RESPONSE FACTOR 16); miRNA binding / transcription factor | chr4:14703369-14705564 REVERSEhighly similar to ( 704) loc_os06g47150 12006.m091768 protein auxin response factor 16, putative, expressedAuxin_resp B3 PGSC0003DMT400062489	GO:0005634	GO:0003677;GO:0046983
CUST_43135_PI426222305	2.38349	2.83755	3.87171	3.42103	3.24178	3.0436	PGSC0003DMT400028368	DNA binding protein		DNA binding protein	PGSC0003DMP400019312	PGSC0003DMG400010931	PGSC0003DMC400019312	PGSC0003DMT400028368	27.3.50	RNA.regulation of transcription.General Transcription	pgsc0003dmp400019312	weakly similar to ( 123) AT5G09380 | Symbols: | DNA-directed RNA polymerase III RPC4 family protein | chr5:2911313-2913136 REVERSEweakly similar to ( 112) loc_os04g32350 12004.m08333 protein DNA binding protein, putative, expressedRNA_pol_Rpc4 PGSC0003DMT400028368
CUST_11851_PI426222305	2.28002	2.79598	2.59385	4.24112	3.76668	3.7064	PGSC0003DMT400046598	F-box family protein	chr03	F-box family protein	PGSC0003DMP400031524	PGSC0003DMG400018090	PGSC0003DMC400031524	PGSC0003DMT400046598	27.3.8	RNA.regulation of transcription.C2C2(Zn) DOF zinc finger family	pgsc0003dmp400031524	weakly similar to ( 143) AT5G62940 | Symbols: | Dof-type zinc finger domain-containing protein | chr5:25257183-25258504 REVERSEweakly similar to ( 110) PBF_MAIZE Dof zinc finger protein PBF (Prolamin box-binding factor) - Zea mays (Maize)weakly similar to ( 143) loc_os02g47810 12002.m09815 protein dof domain, zinc finger family protein, expressedzf-Dof PGSC0003DMT400046598	GO:0005634	GO:0003700;GO:0003677;GO:0008270
CUST_5151_PI426222305	2.02476	2.98958	2.09017	4.62873	2.06724	3.70533	PGSC0003DMT400009348	Putative calcium-dependent protein kinase CPK1 adapter protein 2	chr09	Putative calcium-dependent protein kinase CPK1 adapter protein 2	PGSC0003DMP400006495	PGSC0003DMG400003635	PGSC0003DMC400006495	PGSC0003DMT400009348	27.3.51	RNA.regulation of transcription.General Transcription, TBP-binding protein	pgsc0003dmp400006495	moderately similar to ( 237) AT2G17990 | Symbols: | LOCATED IN: cellular_component unknown; EXPRESSED IN: 23 plant structures; EXPRESSED DURING: 15 growth stages; BEST Arabidopsis thaliana protein match is: kinectin-related (TAIR:AT5G66250.3); Has 6110 Blast hits to 4860 proteins in 486 species: Archae - 160; Bacteria - 541; Metazoa - 3188; Fungi - 404; Plants - 270; Viruses - 41; Other Eukaryote…
CUST_35797_PI426222305	1.85991	2.22605	2.22176	4.57767	4.78894	4.38249	PGSC0003DMT400088995	Tetratricopeptide-like helical	chr01	Tetratricopeptide-like helical	PGSC0003DMP400060670	PGSC0003DMG400038566	PGSC0003DMC400060670	PGSC0003DMT400088995	27.3.25	RNA.regulation of transcription.MYB domain transcription factor family	pgsc0003dmp400060670	highly similar to ( 583) AT1G14470 | Symbols: | pentatricopeptide (PPR) repeat-containing protein | chr1:4954080-4955702 FORWARDweakly similar to ( 109) RF1_ORYSA Rf1 protein, mitochondrial precursor (PPR protein) (Fertility restorer) (Restorer for CMS) - Oryza sativa (Rice)moderately similar to ( 489) loc_os09g15800 12009.m04841 protein pentatricopeptide repeat protein PPR868-14, putative PGSC00…	GO:0005739
CUST_22942_PI426222305	1.76706	2.8085	2.4504	9.27056	2.13236	8.04593	PGSC0003DMT400021130	BHLH transcription factor PTF1	chr10	BHLH transcription factor PTF1	PGSC0003DMP400014389	PGSC0003DMG400008183	PGSC0003DMC400014389	PGSC0003DMT400021130	27.3.6	RNA.regulation of transcription.bHLH,Basic Helix-Loop-Helix family	pgsc0003dmp400014389	moderately similar to ( 208) AT3G57800 | Symbols: | basic helix-loop-helix (bHLH) family protein | chr3:21408034-21411321 REVERSEweakly similar to ( 137) loc_os04g28280 12004.m07945 protein BHLH transcription factor, putative, expressed PGSC0003DMT400021130	GO:0005634	GO:0003700;GO:0003677;GO:0046983
CUST_34296_PI426222305	1.49615	2.20106	2.08574	4.45377	4.21146	2.85988	PGSC0003DMT400044854	SET domain-containing protein	chr05	Ribulose-1,5 bisphosphate carboxylase/oxygenase large subunit N-methyltransferase, chloroplast	PGSC0003DMP400030407	PGSC0003DMG400017407	PGSC0003DMC400030407	PGSC0003DMT400044854	27.3.69	RNA.regulation of transcription.SET-domain transcriptional regulator family	pgsc0003dmp400030407	weakly similar to ( 175) AT3G07670 | Symbols: | SET domain-containing protein | chr3:2451651-2454617 FORWARDweakly similar to ( 165) loc_os02g49326 12002.m09967 protein ribulose-1,5-bisphosphate carboxylase/oxygenase small subunit N-methyltransferase I, putative, expressed PGSC0003DMT400044854
CUST_24514_PI426222305	0.982698	2.57299	2.09994	3.97567	2.05885	2.50894	PGSC0003DMT400054377	Nucleic acid binding protein	chr07	Nucleic acid binding protein	PGSC0003DMP400036580	PGSC0003DMG400021105	PGSC0003DMC400036580	PGSC0003DMT400054377	27.3.67	RNA.regulation of transcription.putative transcription regulator	pgsc0003dmp400036580	weakly similar to ( 131) AT1G30680 | Symbols: | toprim domain-containing protein | chr1:10881665-10886060 FORWARDweakly similar to ( 146) loc_os06g45980 12006.m09126 protein nucleic acid binding protein, putative, expressed PGSC0003DMT400054377
CUST_15872_PI426222305	2.28682	1.45322	2.85454	4.89642	2.76392	2.82961	PGSC0003DMT400057810	Tfiih, polypeptide	chr02	Tfiih, polypeptide	PGSC0003DMP400038923	PGSC0003DMG400022441	PGSC0003DMC400038923	PGSC0003DMT400057810	27.3.50	RNA.regulation of transcription.General Transcription	pgsc0003dmp400038923	moderately similar to ( 231) AT4G17020 | Symbols: | transcription factor-related | chr4:9578152-9581082 REVERSEmoderately similar to ( 218) loc_os04g58350 12004.m35521 protein TFIIH basal transcription factor complex p52 subunit, putative, expressed PGSC0003DMT400057810
CUST_48230_PI426222305	1.86465	1.92787	2.16812	4.99719	4.41458	2.92042	PGSC0003DMT400055906	DNA binding protein	chr02	DNA binding protein	PGSC0003DMP400037645	PGSC0003DMG400021717	PGSC0003DMC400037645	PGSC0003DMT400055906	27.3.6	RNA.regulation of transcription.bHLH,Basic Helix-Loop-Helix family	pgsc0003dmp400037645	weakly similar to ( 181) AT5G54680 | Symbols: ILR3 | ILR3 (iaa-leucine resistant3); DNA binding / transcription factor | chr5:22217270-22218993 FORWARDweakly similar to ( 172) loc_os07g35870 12007.m28990 protein bHLH transcription factor, putative, expressed PGSC0003DMT400055906
CUST_44721_PI426222305	1.60559	1.59154	2.03003	2.92449	2.99279	2.53925	PGSC0003DMT400045314	BZIP transcriptional activator	chr06	BZIP transcriptional activator	PGSC0003DMP400030704	PGSC0003DMG400017577	PGSC0003DMC400030704	PGSC0003DMT400045314	27.3.35	RNA.regulation of transcription.bZIP transcription factor family	pgsc0003dmp400030704	weakly similar to ( 178) AT1G43700 | Symbols: VIP1 | VIP1 (VIRE2-INTERACTING PROTEIN 1); protein binding / transcription factor | chr1:16484352-16486017 FORWARDweakly similar to ( 159) RF2B_ORYSA Transcription factor RF2b - Oryza sativa (Rice)weakly similar to ( 172) loc_os12g06520 12012.m04642 protein transcription factor PosF21, putative, expressed PGSC0003DMT400045314	GO:0005634;GO:0005737	GO:0003700;GO:0046983;GO:0043565
CUST_22982_PI426222305	1.08278	1.98065	2.04569	4.043	2.38788	3.21569	PGSC0003DMT400021053	YA3	chr10	YA3	PGSC0003DMP400014334	PGSC0003DMG400008148	PGSC0003DMC400014334	PGSC0003DMT400021053	27.3.14	RNA.regulation of transcription.CCAAT box binding factor family, HAP2	pgsc0003dmp400014334	very weakly similar to (95.9) AT5G12840 | Symbols: HAP2A, ATHAP2A, NF-YA1 | NF-YA1 (NUCLEAR FACTOR Y, SUBUNIT A1); transcription factor | chr5:4051147-4052961 REVERSEweakly similar to ( 119) loc_os03g48970 12003.m101451 protein nuclear transcription factor Y subunit A-1, putative, expressedCBF CBFB_NFYA PGSC0003DMT400021053	GO:0005634	GO:0003700
CUST_19604_PI426222305	11.9733	12.4002	1.1186	24.404	22.3393	18.4097	PGSC0003DMT400023321	Myb 12 transcription factor	chr01	Myb 12 transcription factor	PGSC0003DMP400015891	PGSC0003DMG400009033	PGSC0003DMC400015891	PGSC0003DMT400023321	27.3.25	RNA.regulation of transcription.MYB domain transcription factor family	pgsc0003dmp400015891	moderately similar to ( 225) AT2G47460 | Symbols: MYB12, ATMYB12, PFG1 | MYB12 (MYB DOMAIN PROTEIN 12); DNA binding / transcription activator/ transcription factor | chr2:19476438-19479242 FORWARDmoderately similar to ( 217) MYBP_MAIZE Myb-related protein P - Zea mays (Maize)weakly similar to ( 199) loc_os03g19120 12003.m07329 protein yellow seed1, putative PGSC0003DMT400023321		GO:0003677
CUST_42440_PI426222305	3.67496	4.59085	1.27466	9.88853	11.3933	6.0833	PGSC0003DMT400059171	Isoform 2 of Protein CHLOROPLAST IMPORT APPARATUS 2	chr07	Protein CHLOROPLAST IMPORT APPARATUS 2	PGSC0003DMP400039847	PGSC0003DMG400022983	PGSC0003DMC400039847	PGSC0003DMT400059171	27.3.34	RNA.regulation of transcription.Orphan family	pgsc0003dmp400039847	moderately similar to ( 210) AT5G57180 | Symbols: CIA2 | CIA2 (CHLOROPLAST IMPORT APPARATUS 2); transcription regulator | chr5:23168393-23169523 FORWARDweakly similar to ( 139) loc_os02g05470 12002.m05895 protein CCT motif family protein, expressed PGSC0003DMT400059171
CUST_42459_PI426222305	3.65542	4.23131	1.19197	9.36797	11.2969	5.97262	PGSC0003DMT400059170	Protein CHLOROPLAST IMPORT APPARATUS 2	chr07	Protein CHLOROPLAST IMPORT APPARATUS 2	PGSC0003DMP400039846	PGSC0003DMG400022983	PGSC0003DMC400039846	PGSC0003DMT400059170	27.3.7	RNA.regulation of transcription.C2C2(Zn) CO-like, Constans-like zinc finger family	pgsc0003dmp400039846	moderately similar to ( 221) AT5G57180 | Symbols: CIA2 | CIA2 (CHLOROPLAST IMPORT APPARATUS 2); transcription regulator | chr5:23168393-23169523 FORWARDweakly similar to ( 150) loc_os02g05470 12002.m05895 protein CCT motif family protein, expressed PGSC0003DMT400059170
CUST_17681_PI426222305	3.63651	6.06764	1.62687	10.7883	7.00683	7.57691	PGSC0003DMT400066807	Putative bHLH transcription factor	chr01	Putative bHLH transcription factor	PGSC0003DMP400045048	PGSC0003DMG400025976	PGSC0003DMC400045048	PGSC0003DMT400066807	27.3.6	RNA.regulation of transcription.bHLH,Basic Helix-Loop-Helix family	pgsc0003dmp400045048	moderately similar to ( 219) AT4G00050 | Symbols: UNE10 | UNE10 (unfertilized embryo sac 10); DNA binding / transcription factor | chr4:17863-19848 FORWARDvery weakly similar to (85.9) loc_os06g06900 12006.m05415 protein helix-loop-helix DNA-binding domain containing protein, expressed PGSC0003DMT400066807	GO:0005634;GO:0009506	GO:0003700;GO:0003677;GO:0046983
CUST_5372_PI426222305	3.4581	7.49465	1.46898	10.5892	8.65606	8.84699	PGSC0003DMT400009327	COL domain class transcription factor	chr09	COL domain class transcription factor	PGSC0003DMP400006479	PGSC0003DMG400003625	PGSC0003DMC400006479	PGSC0003DMT400009327	27.3.7	RNA.regulation of transcription.C2C2(Zn) CO-like, Constans-like zinc finger family	pgsc0003dmp400006479	weakly similar to ( 186) AT4G38960 | Symbols: | zinc finger (B-box type) family protein | chr4:18162300-18163045 FORWARDmoderately similar to ( 204) loc_os09g35880 12009.m06539 protein salt tolerance-like protein, putative, expressed PGSC0003DMT400009327
CUST_26718_PI426222305	3.28934	2.56052	1.20958	13.7071	11.7455	6.00069	PGSC0003DMT400061541	Dehydration responsive element binding protein	chr06	Dehydration responsive element binding protein	PGSC0003DMP400041406	PGSC0003DMG401023951	PGSC0003DMC400041406	PGSC0003DMT400061541	27.3.3	RNA.regulation of transcription.AP2/EREBP, APETALA2/Ethylene-responsive element binding protein family	pgsc0003dmp400041406	weakly similar to ( 134) AT2G40350 | Symbols: | DNA binding / transcription factor | chr2:16851595-16852068 REVERSEweakly similar to ( 130) loc_os01g07120 12001.m07339 protein dehydration-responsive element-binding protein 2A, putative, expressedAP2 AP2 PGSC0003DMT400061541	GO:0005634	GO:0003700;GO:0003677
CUST_9404_PI426222305	3.21303	3.57065	1.47877	3.81889	3.76585	3.45421	PGSC0003DMT400006751	AP2 domain class transcription factor	chr03	AP2 domain class transcription factor	PGSC0003DMP400004686	PGSC0003DMG400002620	PGSC0003DMC400004686	PGSC0003DMT400006751	27.3.3	RNA.regulation of transcription.AP2/EREBP, APETALA2/Ethylene-responsive element binding protein family	pgsc0003dmp400004686	weakly similar to ( 155) AT5G11590 | Symbols: TINY2 | TINY2 (TINY2); DNA binding / transcription factor | chr5:3727789-3728499 REVERSEweakly similar to ( 127) loc_os10g41130 12010.m06878 protein DREB-like protein, putative, expressedAP2 AP2 PGSC0003DMT400006751	GO:0005634	GO:0003700;GO:0043565
CUST_17765_PI426222305	2.77897	4.90246	1.23394	10.6561	8.00521	6.62705	PGSC0003DMT400066808	Putative bHLH transcription factor	chr01	Putative bHLH transcription factor	PGSC0003DMP400045049	PGSC0003DMG400025976	PGSC0003DMC400045049	PGSC0003DMT400066808	27.3.6	RNA.regulation of transcription.bHLH,Basic Helix-Loop-Helix family	pgsc0003dmp400045049	moderately similar to ( 216) AT4G00050 | Symbols: UNE10 | UNE10 (unfertilized embryo sac 10); DNA binding / transcription factor | chr4:17863-19848 FORWARDvery weakly similar to (86.7) loc_os06g06900 12006.m05415 protein helix-loop-helix DNA-binding domain containing protein, expressed PGSC0003DMT400066808		GO:0003674
CUST_12119_PI426222305	2.73602	4.66988	1.09025	25.7614	16.3807	10.9663	PGSC0003DMT400056773	DNA damage-binding protein	chr09	DNA damage-binding protein	PGSC0003DMP400038169	PGSC0003DMG400022078	PGSC0003DMC400038169	PGSC0003DMT400056773	27.3.99	RNA.regulation of transcription.unclassified	pgsc0003dmp400038169	weakly similar to ( 138) AT5G58760 | Symbols: DDB2 | DDB2 (damaged DNA-binding 2); nucleic acid binding / nucleotide binding / zinc ion binding | chr5:23730741-23733606 REVERSEweakly similar to ( 131) loc_os01g04870 12001.m07121 protein nucleic acid binding protein, putative, expressed PGSC0003DMT400056773
CUST_26784_PI426222305	2.53302	3.33321	1.5672	6.95444	3.11662	4.37312	PGSC0003DMT400035287	Conserved gene of unknown function	chr07	Conserved gene of unknown function	PGSC0003DMP400023999	PGSC0003DMG401013561	PGSC0003DMC400023999	PGSC0003DMT400035287	27.3.99	RNA.regulation of transcription.unclassified	pgsc0003dmp400023999	moderately similar to ( 317) AT3G17611 | Symbols: ATRBL14 | ATRBL14 (ARABIDOPSIS RHOMBOID-LIKE PROTEIN 14); zinc ion binding | chr3:6025652-6026173 FORWARDmoderately similar to ( 243) loc_os01g18100 12001.m08352 protein rhomboid domain containing 1, putative, expressed PGSC0003DMT400035287
CUST_12327_PI426222305	2.43707	3.03478	1.23492	5.80341	3.99912	3.3124	PGSC0003DMT400007231	Transcription factor	chr01	Transcription factor	PGSC0003DMP400005028	PGSC0003DMG400002796	PGSC0003DMC400005028	PGSC0003DMT400007231	27.3.6	RNA.regulation of transcription.bHLH,Basic Helix-Loop-Helix family	pgsc0003dmp400005028	weakly similar to ( 110) AT3G17100 | Symbols: | transcription factor | chr3:5831552-5832244 FORWARDweakly similar to ( 105) loc_os03g19780 12003.m07393 protein expressed protein PGSC0003DMT400007231
CUST_12016_PI426222305	2.43419	3.58134	1.37796	7.13434	5.81467	5.74446	PGSC0003DMT400076662	Mitochondrial transcription termination factor family protein / mTERF family protein	chr12	Mitochondrial transcription termination factor family protein / mTERF family protein	PGSC0003DMP400051941	PGSC0003DMG401029813	PGSC0003DMC400051941	PGSC0003DMT400076662	27.3.99	RNA.regulation of transcription.unclassified	pgsc0003dmp400051941	moderately similar to ( 449) AT5G55580 | Symbols: | mitochondrial transcription termination factor family protein / mTERF family protein | chr5:22515601-22517408 FORWARDmoderately similar to ( 418) loc_os07g39430 12007.m08185 protein mTERF family protein, expressedmTERF PGSC0003DMT400076662
CUST_3075_PI426222305	2.39636	2.77148	1.74848	2.53017	2.03557	2.14518	PGSC0003DMT400000546	MYBR domain class transcription factor	chr01	MYBR domain class transcription factor	PGSC0003DMP400000411	PGSC0003DMG400000189	PGSC0003DMC400000411	PGSC0003DMT400000546	27.3.26	RNA.regulation of transcription.MYB-related transcription factor family	pgsc0003dmp400000411	moderately similar to ( 250) AT5G52660 | Symbols: | myb family transcription factor | chr5:21359423-21362037 REVERSEmoderately similar to ( 253) loc_os02g45670 12002.m100315 protein DNA binding protein, putative, expressed PGSC0003DMT400000546
CUST_3265_PI426222305	2.34154	3.37751	1.15926	3.94765	3.78631	3.46039	PGSC0003DMT400000029	MADS-box transcription factor FBP20	chr01	Transcription factor	PGSC0003DMP400000028	PGSC0003DMG400000008	PGSC0003DMC400000028	PGSC0003DMT400000029	27.3.24	RNA.regulation of transcription.MADS box transcription factor family	pgsc0003dmp400000028	very weakly similar to (83.2) AT2G45660 | Symbols: AGL20, SOC1 | AGL20 (AGAMOUS-LIKE 20); transcription factor | chr2:18807799-18810193 REVERSE PGSC0003DMT400000029	GO:0005634	GO:0003700
CUST_28706_PI426222305	2.31466	2.99568	1.29085	6.93111	9.69668	5.08232	PGSC0003DMT400010450	Agamous-like MADS-box protein AGL8 homolog	chr06	Agamous-like MADS-box protein AGL8 homolog	PGSC0003DMP400007292	PGSC0003DMG400004081	PGSC0003DMC400007292	PGSC0003DMT400010450	27.3.24	RNA.regulation of transcription.MADS box transcription factor family	pgsc0003dmp400007292	moderately similar to ( 252) AT5G60910 | Symbols: AGL8, FUL | AGL8 (agamous-like 8); transcription factor | chr5:24502736-24504934 REVERSEmoderately similar to ( 357) AGL8_SOLTU Agamous-like MADS-box protein AGL8 homolog (POTM1-1) - Solanum tuberosum (Potato)moderately similar to ( 212) loc_os03g54160 12003.m35583 protein MADS-box transcription factor 14, putative, expressedMADS_MEF2_like MADS K-…	GO:0005634	GO:0003700;GO:0003677;GO:0046983
CUST_38973_PI426222305	2.11165	2.34206	1.7758	5.14837	3.65158	3.33243	PGSC0003DMT400070363	Gene of unknown function	chr06	Gene of unknown function	PGSC0003DMP400047570	PGSC0003DMG400027357	PGSC0003DMC400047570	PGSC0003DMT400070363	27.3	RNA.regulation of transcription	pgsc0003dmp400047570	highly similar to ( 624) AT1G09900 | Symbols: | pentatricopeptide (PPR) repeat-containing protein | chr1:3218133-3219929 FORWARDmoderately similar to ( 216) RF1_ORYSA Rf1 protein, mitochondrial precursor (PPR protein) (Fertility restorer) (Restorer for CMS) - Oryza sativa (Rice)moderately similar to ( 434) loc_os02g35750 12002.m33725 protein rf1 protein, mitochondrial precursor, putative, express…
CUST_43832_PI426222305	2.04407	2.47034	1.395	2.49213	2.06344	2.93795	PGSC0003DMT400040147	MYB1-2	chr11	MYB1-2	PGSC0003DMP400027223	PGSC0003DMG400015536	PGSC0003DMC400027223	PGSC0003DMT400040147	27.3.25	RNA.regulation of transcription.MYB domain transcription factor family	pgsc0003dmp400027223	weakly similar to ( 107) AT3G46130 | Symbols: MYB111, PFG3, ATMYB48-2 | MYB111 (MYB DOMAIN PROTEIN 111); DNA binding / transcription factor | chr3:16945465-16946376 FORWARDvery weakly similar to ( 100) MYBA2_ORYSA Myb-related protein MYBAS2 - Oryza sativa (Rice)weakly similar to ( 102) loc_os12g37970 12012.m56456 protein MYB59, putative, expressed PGSC0003DMT400040147
CUST_43778_PI426222305	2.0366	2.48569	1.36576	2.23028	2.26131	2.98895	PGSC0003DMT400040149	MYB1-2	chr11	MYB1-2	PGSC0003DMP400027224	PGSC0003DMG400015536	PGSC0003DMC400027224	PGSC0003DMT400040149	27.3.25	RNA.regulation of transcription.MYB domain transcription factor family	pgsc0003dmp400027224	moderately similar to ( 203) AT3G46130 | Symbols: MYB111, PFG3, ATMYB48-2 | MYB111 (MYB DOMAIN PROTEIN 111); DNA binding / transcription factor | chr3:16945465-16946376 FORWARDweakly similar to ( 195) MYBA2_ORYSA Myb-related protein MYBAS2 - Oryza sativa (Rice)weakly similar to ( 195) loc_os12g37970 12012.m56456 protein MYB59, putative, expressed PGSC0003DMT400040149
CUST_28755_PI426222305	2.00325	2.34199	1.28385	7.55983	9.91045	5.04599	PGSC0003DMT400010451	Agamous-like MADS-box protein AGL8 homolog	chr06	Agamous-like MADS-box protein AGL8 homolog	PGSC0003DMP400007293	PGSC0003DMG400004081	PGSC0003DMC400007293	PGSC0003DMT400010451	27.3.24	RNA.regulation of transcription.MADS box transcription factor family	pgsc0003dmp400007293	moderately similar to ( 256) AT5G60910 | Symbols: AGL8, FUL | AGL8 (agamous-like 8); transcription factor | chr5:24502736-24504934 REVERSEmoderately similar to ( 421) AGL8_SOLTU Agamous-like MADS-box protein AGL8 homolog (POTM1-1) - Solanum tuberosum (Potato)moderately similar to ( 217) loc_os03g54160 12003.m35583 protein MADS-box transcription factor 14, putative, expressedMADS_MEF2_like MADS MA…	GO:0005634	GO:0003700;GO:0003677;GO:0046983
CUST_27061_PI426222305	3.19386	2.37121	0.844826	5.88548	2.4533	4.4214	PGSC0003DMT400065851	Myb-like DNA-binding protein	chr03	Myb-like DNA-binding protein	PGSC0003DMP400044420	PGSC0003DMG400025632	PGSC0003DMC400044420	PGSC0003DMT400065851	27.3.26	RNA.regulation of transcription.MYB-related transcription factor family	pgsc0003dmp400044420	weakly similar to ( 123) AT1G18330 | Symbols: EPR1 | EPR1 (EARLY-PHYTOCHROME-RESPONSIVE1); DNA binding / transcription factor | chr1:6306196-6307718 REVERSEweakly similar to ( 127) loc_os06g51260 12006.m091802 protein expressed protein PGSC0003DMT400065851
CUST_21137_PI426222305	1.95682	2.39629	1.35131	2.41408	2.0159	2.74942	PGSC0003DMT400020232	Two-component system sensor histidine kinase/response regulator	chr12	Two-component system sensor histidine kinase/response regulator	PGSC0003DMP400013790	PGSC0003DMG400007823	PGSC0003DMC400013790	PGSC0003DMT400020232	27.3.5	RNA.regulation of transcription.ARR	pgsc0003dmp400013790	moderately similar to ( 353) AT2G25180 | Symbols: ARR12 | ARR12 (ARABIDOPSIS RESPONSE REGULATOR 12); transcription factor/ two-component response regulator | chr2:10724490-10726961 REVERSEvery weakly similar to (89.0) PRR95_ORYSA Two-component response regulator-like PRR95 (Pseudo-response regulator 95) (OsPRR95) - Oryza sativa (Rice)moderately similar to ( 380) loc_os02g55320 12002.m10558 protei…		GO:0003677;GO:0000156
CUST_37991_PI426222305	1.82552	2.72764	1.32303	5.49038	7.04442	2.94438	PGSC0003DMT400081417	GATA transcription factor	chr09	GATA transcription factor	PGSC0003DMP400055095	PGSC0003DMG400031828	PGSC0003DMC400055095	PGSC0003DMT400081417	27.3.9	RNA.regulation of transcription.C2C2(Zn) GATA transcription factor family	pgsc0003dmp400055095	very weakly similar to (84.3) loc_os03g61570 12003.m11038 protein expressed protein PGSC0003DMT400081417		GO:0003700;GO:0008270;GO:0043565
CUST_29328_PI426222305	1.76572	2.2215	1.53288	14.4709	6.10794	6.56065	PGSC0003DMT400068532	DNA binding protein	chr08	DNA binding protein	PGSC0003DMP400046303	PGSC0003DMG400026658	PGSC0003DMC400046303	PGSC0003DMT400068532	27.3.11	RNA.regulation of transcription.C2H2 zinc finger family	pgsc0003dmp400046303	moderately similar to ( 475) AT3G07940 | Symbols: | zinc finger and C2 domain protein, putative | chr3:2529542-2531368 FORWARDmoderately similar to ( 435) loc_os01g72230 12001.m13258 protein GTPase activating protein, putative, expressedArfGap ArfGap COG5347 C2 C2 PGSC0003DMT400068532
CUST_850_PI426222305	1.72915	2.34182	1.73051	4.31932	3.89726	3.31212	PGSC0003DMT400032877	LOB domain-containing protein	chr02	LOB domain-containing protein	PGSC0003DMP400022372	PGSC0003DMG400012629	PGSC0003DMC400022372	PGSC0003DMT400032877	27.3.37	RNA.regulation of transcription.AS2,Lateral Organ Boundaries Gene Family	pgsc0003dmp400022372	weakly similar to ( 200) AT3G27650 | Symbols: LBD25 | LBD25 (LOB DOMAIN-CONTAINING PROTEIN 25) | chr3:10238731-10240346 FORWARDweakly similar to ( 199) loc_os01g07480 12001.m42608 protein ramosa 2, putative, expressedDUF260 PGSC0003DMT400032877
CUST_34309_PI426222305	1.68132	2.71474	1.71493	5.50068	4.30888	4.03659	PGSC0003DMT400044857	Ribulose-1,5 bisphosphate carboxylase/oxygenase large subunit N-methyltransferase, chloroplast	chr07	Ribulose-1,5 bisphosphate carboxylase/oxygenase large subunit N-methyltransferase, chloroplast	PGSC0003DMP400030410	PGSC0003DMG400017407	PGSC0003DMC400030410	PGSC0003DMT400044857	27.3.69	RNA.regulation of transcription.SET-domain transcriptional regulator family	pgsc0003dmp400030410	moderately similar to ( 305) AT3G07670 | Symbols: | SET domain-containing protein | chr3:2451651-2454617 FORWARDmoderately similar to ( 285) loc_os02g49326 12002.m09967 protein ribulose-1,5-bisphosphate carboxylase/oxygenase small subunit N-methyltransferase I, putative, expressedRubis-subs-bind PGSC0003DMT400044857
CUST_2890_PI426222305	1.6158	2.48298	1.26872	2.73449	3.14744	2.09386	PGSC0003DMT400000028	Transcription factor	chr01	Transcription factor	PGSC0003DMP400000027	PGSC0003DMG400000008	PGSC0003DMC400000027	PGSC0003DMT400000028	27.3.24	RNA.regulation of transcription.MADS box transcription factor family	pgsc0003dmp400000027	weakly similar to ( 174) AT2G45660 | Symbols: AGL20, SOC1 | AGL20 (AGAMOUS-LIKE 20); transcription factor | chr2:18807799-18810193 REVERSEweakly similar to ( 153) MAD50_ORYSA MADS-box transcription factor 50 (OsMADS50) (Protein SUPPRESSOR OF CONSTANS OVEREXPRESSION 1-like) (OsSOC1) (Protein AGAMOUS-like 20) (RMADS208) - Oryza sativa (Rice)weakly similar to ( 152) loc_os10g39130 12010.m21952 prote…	GO:0005634;GO:0005737	GO:0003700;GO:0003677;GO:0046983
CUST_15497_PI426222305	1.47238	2.83308	1.13082	153.7	89.848	20.6834	PGSC0003DMT400037472	Pollen-specific C2 domain containing protein	chr12	Pollen-specific C2 domain containing protein	PGSC0003DMP400025475	PGSC0003DMG400014458	PGSC0003DMC400025475	PGSC0003DMT400037472	27.3.11	RNA.regulation of transcription.C2H2 zinc finger family	pgsc0003dmp400025475	moderately similar to ( 234) AT3G17980 | Symbols: | C2 domain-containing protein | chr3:6152417-6153115 FORWARDweakly similar to ( 196) loc_os02g22130 12002.m07451 protein GTPase activating protein, putative, expressedC2 C2 PGSC0003DMT400037472
CUST_27112_PI426222305	1.45018	2.22387	1.01828	16.9987	16.1328	4.03356	PGSC0003DMT400040864	Conserved gene of unknown function	chr03	Conserved gene of unknown function	PGSC0003DMP400027719	PGSC0003DMG400015799	PGSC0003DMC400027719	PGSC0003DMT400040864	27.3.67	RNA.regulation of transcription.putative transcription regulator	pgsc0003dmp400027719	moderately similar to ( 209) AT5G52420 | Symbols: | unknown protein | chr5:21281817-21282545 FORWARDweakly similar to ( 159) loc_os10g40040 12010.m06777 protein expressed protein PGSC0003DMT400040864
CUST_39687_PI426222305	1.41948	2.39042	1.07769	10.4426	2.51232	4.26946	PGSC0003DMT400028057	MYC1	chr10	MYC1	PGSC0003DMP400019126	PGSC0003DMG401010822	PGSC0003DMC400019126	PGSC0003DMT400028057	27.3.6	RNA.regulation of transcription.bHLH,Basic Helix-Loop-Helix family	pgsc0003dmp400019126	moderately similar to ( 211) AT4G00870 | Symbols: | basic helix-loop-helix (bHLH) family protein | chr4:362230-363639 REVERSEweakly similar to ( 152) loc_os10g42430 12010.m06996 protein transcription factor MYC7E, putative, expressed PGSC0003DMT400028057
CUST_13058_PI426222305	1.39566	2.51799	1.16172	10.8677	9.38038	7.42241	PGSC0003DMT400063312	MADS box protein	chr03	MADS box protein	PGSC0003DMP400042628	PGSC0003DMG400024625	PGSC0003DMC400042628	PGSC0003DMT400063312	27.3.24	RNA.regulation of transcription.MADS box transcription factor family	pgsc0003dmp400042628	moderately similar to ( 231) AT5G60910 | Symbols: AGL8, FUL | AGL8 (agamous-like 8); transcription factor | chr5:24502736-24504934 REVERSEmoderately similar to ( 257) AGL8_SOLTU Agamous-like MADS-box protein AGL8 homolog (POTM1-1) - Solanum tuberosum (Potato)moderately similar to ( 201) loc_os03g54160 12003.m35583 protein MADS-box transcription factor 14, putative, expressedMADS_MEF2_like MADS MA…
CUST_41748_PI426222305	1.35291	2.0368	1.92084	5.11182	3.0817	3.10507	PGSC0003DMT400015656	Nt-iaa2.3 deduced protein	chr09	Nt-iaa2.3 deduced protein	PGSC0003DMP400010844	PGSC0003DMG400006108	PGSC0003DMC400010844	PGSC0003DMT400015656	27.3.40	RNA.regulation of transcription.Aux/IAA family	pgsc0003dmp400010844	moderately similar to ( 203) AT5G43700 | Symbols: ATAUX2-11, IAA4 | ATAUX2-11 (AUXIN INDUCIBLE 2-11); DNA binding / transcription factor | chr5:17550465-17551206 FORWARDweakly similar to ( 197) IAA4_PEA Auxin-induced protein IAA4 - Pisum sativum (Garden pea)weakly similar to ( 149) loc_os03g43400 12003.m09386 protein OsIAA11 - Auxin-responsive Aux/IAA gene family member, expressedAUX_IAA PGSC0003…
CUST_20400_PI426222305	1.31988	2.60134	1.16352	12.9264	8.46901	5.51483	PGSC0003DMT400033560	MRNA binding protein	chr09	MRNA binding protein	PGSC0003DMP400022826	PGSC0003DMG400012888	PGSC0003DMC400022826	PGSC0003DMT400033560	27.3.99	RNA.regulation of transcription.unclassified	pgsc0003dmp400022826	highly similar to ( 579) AT3G63140 | Symbols: CSP41A | CSP41A (CHLOROPLAST STEM-LOOP BINDING PROTEIN OF 41 KDA); mRNA binding / poly(U) binding | chr3:23327006-23328620 REVERSEhighly similar to ( 508) loc_os07g11110 12007.m05566 protein mRNA binding protein precursor, putative, expressedWcaG PGSC0003DMT400033560	GO:0009534;GO:0048046;GO:0009941;GO:0010287;GO:0010319;GO:0005840	GO:0005515;GO:0003824;GO:0050662;GO:0019843;GO:0003729;GO:0008266
CUST_13840_PI426222305	1.31386	2.07688	1.38411	9.56815	7.22444	4.74308	PGSC0003DMT400040351	Class II knotted-like homeobox protein	chr08	Class II knotted-like homeobox protein	PGSC0003DMP400027373	PGSC0003DMG400015622	PGSC0003DMC400027373	PGSC0003DMT400040351	27.3.22	RNA.regulation of transcription.HB,Homeobox transcription factor family	pgsc0003dmp400027373	moderately similar to ( 475) AT5G25220 | Symbols: KNAT3 | KNAT3 (KNOTTED1-LIKE HOMEOBOX GENE 3); transcription activator/ transcription factor | chr5:8736208-8738087 FORWARDmoderately similar to ( 464) KNAP3_MALDO Homeobox protein knotted-1-like 3 (KNAP3) - Malus domestica (Apple) (Malus sylvestris)moderately similar to ( 432) loc_os08g19650 12008.m06032 protein homeobox protein knotted-1-like 3,…
CUST_16622_PI426222305	1.31232	2.30425	1.03251	33.107	36.4344	7.11782	PGSC0003DMT400069189	NAD dependent epimerase/dehydratase	chr06	NAD dependent epimerase/dehydratase	PGSC0003DMP400046718	PGSC0003DMG400026913	PGSC0003DMC400046718	PGSC0003DMT400069189	27.3.99	RNA.regulation of transcription.unclassified	pgsc0003dmp400046718	highly similar to ( 622) AT1G09340 | Symbols: CRB, CSP41B | CRB (CHLOROPLAST RNA BINDING); binding / catalytic/ coenzyme binding | chr1:3015473-3018035 FORWARDhighly similar to ( 591) loc_os12g23180 12012.m26701 protein RNA binding protein, putative, expressedWcaG PGSC0003DMT400069189	GO:0005777;GO:0005773;GO:0005794;GO:0009506;GO:0048046;GO:0009941;GO:0010287;GO:0010319;GO:0005840	GO:0005515;GO:0003824;GO:0050662;GO:0019843;GO:0010297
CUST_36056_PI426222305	1.23954	2.11037	1.41399	4.6479	2.95671	3.66707	PGSC0003DMT400058560	MADS box transcription factor	chr08	MADS box transcription factor	PGSC0003DMP400039438	PGSC0003DMG400022748	PGSC0003DMC400039438	PGSC0003DMT400058560	27.3.24	RNA.regulation of transcription.MADS box transcription factor family	pgsc0003dmp400039438	weakly similar to ( 160) AT4G22950 | Symbols: AGL19, GL19 | AGL19 (AGAMOUS-LIKE 19); transcription factor | chr4:12023946-12027421 REVERSEweakly similar to ( 154) MAD50_ORYSA MADS-box transcription factor 50 (OsMADS50) (Protein SUPPRESSOR OF CONSTANS OVEREXPRESSION 1-like) (OsSOC1) (Protein AGAMOUS-like 20) (RMADS208) - Oryza sativa (Rice)weakly similar to ( 142) loc_os10g39130 12010.m21952 prote…	GO:0005634	GO:0003700;GO:0003677;GO:0046983
CUST_33574_PI426222305	1.23594	2.60167	1.25866	15.3646	14.7793	5.40802	PGSC0003DMT400045485	Zinc knuckle (CCHC-type) family protein	chr05	Zinc knuckle (CCHC-type) family protein	PGSC0003DMP400030823	PGSC0003DMG400017644	PGSC0003DMC400030823	PGSC0003DMT400045485	27.3.11	RNA.regulation of transcription.C2H2 zinc finger family	pgsc0003dmp400030823	moderately similar to ( 233) AT5G20220 | Symbols: | zinc knuckle (CCHC-type) family protein | chr5:6822208-6825771 FORWARDweakly similar to ( 193) loc_os01g51710 12001.m11349 protein zinc finger protein, putative, expressed PGSC0003DMT400045485
CUST_48503_PI426222305	1.1747	2.00253	1.05686	15.6224	11.8597	2.35466	PGSC0003DMT400025339	Brg-1 associated factor	chr10	Brg-1 associated factor	PGSC0003DMP400017273	PGSC0003DMG400009782	PGSC0003DMC400017273	PGSC0003DMT400025339	27.3.44	RNA.regulation of transcription.Chromatin Remodeling Factors	pgsc0003dmp400017273	weakly similar to ( 139) AT2G14880 | Symbols: | SWIB complex BAF60b domain-containing protein | chr2:6393686-6394841 REVERSEweakly similar to ( 127) loc_os12g32280 12012.m07033 protein expressed proteinSWIB SWIB PGSC0003DMT400025339	GO:0005634	GO:0005515
CUST_41710_PI426222305	1.11087	3.58685	1.56566	8.91013	2.17057	4.73902	PGSC0003DMT400014089	MYC2	chr10	MYC2	PGSC0003DMP400009735	PGSC0003DMG400005525	PGSC0003DMC400009735	PGSC0003DMT400014089	27.3.6	RNA.regulation of transcription.bHLH,Basic Helix-Loop-Helix family	pgsc0003dmp400009735	moderately similar to ( 213) AT4G00870 | Symbols: | basic helix-loop-helix (bHLH) family protein | chr4:362230-363639 REVERSEweakly similar to ( 153) loc_os10g42430 12010.m06996 protein transcription factor MYC7E, putative, expressed PGSC0003DMT400014089
CUST_2430_PI426222305	0.994883	3.41804	1.50318	12.2249	11.8026	4.23824	PGSC0003DMT400028833	Transcription factor HBP-1b	chr10	Transcription factor HBP-1b	PGSC0003DMP400019606	PGSC0003DMG400011102	PGSC0003DMC400019606	PGSC0003DMT400028833	27.3.35	RNA.regulation of transcription.bZIP transcription factor family	pgsc0003dmp400019606	weakly similar to ( 136) AT1G58330 | Symbols: ZW2 | ZW2 | chr1:21641150-21641827 FORWARDweakly similar to ( 110) loc_os01g20030 12001.m08538 protein expressed protein PGSC0003DMT400028833
CUST_23063_PI426222305	0.992813	3.10659	1.34919	7.06527	2.54379	3.39788	PGSC0003DMT400060922	NPR1-interactor protein 1	chr10	NPR1-interactor protein 1	PGSC0003DMP400041000	PGSC0003DMG401023696	PGSC0003DMC400041000	PGSC0003DMT400060922	27.3.35	RNA.regulation of transcription.bZIP transcription factor family	pgsc0003dmp400041000	moderately similar to ( 264) AT5G06950 | Symbols: AHBP-1B, TGA2 | AHBP-1B; DNA binding / transcription activator/ transcription factor/ transcription repressor | chr5:2152323-2154174 FORWARDmoderately similar to ( 338) TGA21_TOBAC TGACG-sequence-specific DNA-binding protein TGA-2.1 (TGA2.1) - Nicotiana tabacum (Common tobacco)moderately similar to ( 296) loc_os01g59350 12001.m42738 protein transc…	GO:0005634	GO:0003700;GO:0043565
CUST_38791_PI426222305	0.971636	3.22282	1.00885	10.4849	6.391	5.65467	PGSC0003DMT400015373	Zinc finger (B-box type) family protein	chr04	Zinc finger (B-box type) family protein	PGSC0003DMP400010649	PGSC0003DMG400005997	PGSC0003DMC400010649	PGSC0003DMT400015373	27.3.7	RNA.regulation of transcription.C2C2(Zn) CO-like, Constans-like zinc finger family	pgsc0003dmp400010649	weakly similar to ( 127) AT1G68190 | Symbols: | zinc finger (B-box type) family protein | chr1:25559384-25561004 FORWARDweakly similar to ( 107) loc_os06g19444 12006.m32050 protein CCT motif family protein, expressed PGSC0003DMT400015373
CUST_10590_PI426222305	0.942464	2.22127	1.76611	15.2678	7.76217	8.31068	PGSC0003DMT400032139	BHLH transcription factor JAF13	chr08	BHLH transcription factor JAF13	PGSC0003DMP400021841	PGSC0003DMG401012339	PGSC0003DMC400021841	PGSC0003DMT400032139	27.3.6	RNA.regulation of transcription.bHLH,Basic Helix-Loop-Helix family	pgsc0003dmp400021841	moderately similar to ( 236) AT5G41315 | Symbols: GL3, MYC6.2 | GL3 (GLABROUS 3); protein binding / transcription factor | chr5:16529457-16532866 FORWARDweakly similar to ( 124) ARRS_MAIZE Anthocyanin regulatory R-S protein - Zea mays (Maize)weakly similar to ( 120) loc_os04g47040 12004.m09650 protein anthocyanin regulatory Lc protein, putative, expressed PGSC0003DMT400032139	GO:0005634	GO:0003700;GO:0003677;GO:0046983
CUST_34299_PI426222305	0.837655	2.15819	1.47953	3.66076	2.33617	2.66139	PGSC0003DMT400044856	Ribulose-1,5 bisphosphate carboxylase/oxygenase large subunit N-methyltransferase, chloroplast	chr05	Ribulose-1,5 bisphosphate carboxylase/oxygenase large subunit N-methyltransferase, chloroplast	PGSC0003DMP400030409	PGSC0003DMG400017407	PGSC0003DMC400030409	PGSC0003DMT400044856	27.3.69	RNA.regulation of transcription.SET-domain transcriptional regulator family	pgsc0003dmp400030409	moderately similar to ( 392) AT3G07670 | Symbols: | SET domain-containing protein | chr3:2451651-2454617 FORWARDmoderately similar to ( 367) loc_os02g49326 12002.m09967 protein ribulose-1,5-bisphosphate carboxylase/oxygenase small subunit N-methyltransferase I, putative, expressedRubis-subs-bind PGSC0003DMT400044856
CUST_29347_PI426222305	1.18667	2.41387	0.906048	11.3724	5.41212	4.79528	PGSC0003DMT400068533	DNA binding protein	chr08	DNA binding protein	PGSC0003DMP400046304	PGSC0003DMG400026658	PGSC0003DMC400046304	PGSC0003DMT400068533	27.3.11	RNA.regulation of transcription.C2H2 zinc finger family	pgsc0003dmp400046304	moderately similar to ( 490) AT3G07940 | Symbols: | zinc finger and C2 domain protein, putative | chr3:2529542-2531368 FORWARDmoderately similar to ( 431) loc_os01g72230 12001.m13258 protein GTPase activating protein, putative, expressedArfGap ArfGap COG5347 C2 C2 PGSC0003DMT400068533
CUST_39663_PI426222305	1.1824	2.3015	0.816034	10.1957	3.1816	5.73674	PGSC0003DMT400028055	DNA binding protein	chr10	MYC1	PGSC0003DMP400019124	PGSC0003DMG401010822	PGSC0003DMC400019124	PGSC0003DMT400028055	27.3.6	RNA.regulation of transcription.bHLH,Basic Helix-Loop-Helix family	pgsc0003dmp400019124	very weakly similar to (97.4) AT1G32640 | Symbols: ATMYC2, RD22BP1, JAI1, JIN1, MYC2, ZBF1 | MYC2; DNA binding / transcription activator/ transcription factor | chr1:11799042-11800913 REVERSEvery weakly similar to (95.9) loc_os10g42430 12010.m06996 protein transcription factor MYC7E, putative, expressed PGSC0003DMT400028055
CUST_17430_PI426222305	2.36459	1.67594	1.78365	5.62565	3.94712	3.87731	PGSC0003DMT400068078	Transcription regulator	chr03	Transcription regulator	PGSC0003DMP400045991	PGSC0003DMG400026478	PGSC0003DMC400045991	PGSC0003DMT400068078	27.3	RNA.regulation of transcription	pgsc0003dmp400045991	weakly similar to ( 130) AT5G17560 | Symbols: | BolA-like family protein | chr5:5788474-5789671 FORWARDweakly similar to ( 131) loc_os06g28970 12006.m07441 protein transcription regulator, putative, expressed PGSC0003DMT400068078
CUST_48713_PI426222305	2.19962	1.86381	1.34657	7.66919	4.72634	6.61698	PGSC0003DMT400036286	MYB transcription factor		MYB transcription factor	PGSC0003DMP400024609	PGSC0003DMG400013966	PGSC0003DMC400024609	PGSC0003DMT400036286	27.3.25	RNA.regulation of transcription.MYB domain transcription factor family	pgsc0003dmp400024609	weakly similar to ( 136) AT1G66370 | Symbols: MYB113, AtMYB113 | MYB113 (myb domain protein 113); DNA binding / transcription factor | chr1:24753634-24754604 FORWARDweakly similar to ( 117) MYBC_MAIZE Anthocyanin regulatory C1 protein - Zea mays (Maize)weakly similar to ( 117) loc_os03g29614 12003.m08231 protein anthocyanin regulatory C1 protein, putative, expressed PGSC0003DMT400036286
CUST_48721_PI426222305	2.16657	1.68454	1.11637	6.78263	6.06249	4.63418	PGSC0003DMT400019985	Homeodomain protein GL2-like 1	chr10	HD domain class transcription factor	PGSC0003DMP400013650	PGSC0003DMG400007733	PGSC0003DMC400013650	PGSC0003DMT400019985	27.3.22	RNA.regulation of transcription.HB,Homeobox transcription factor family	pgsc0003dmp400013650	highly similar to ( 890) AT4G00730 | Symbols: ANL2, AHDP | ANL2 (ANTHOCYANINLESS 2); transcription factor/ transcription regulator | chr4:301071-304103 REVERSEhighly similar to ( 838) loc_os02g45250 12002.m09564 protein homeobox protein FWA, putative, expressedSTART START START Homeobox PGSC0003DMT400019985		GO:0003700;GO:0043565
CUST_33909_PI426222305	2.11905	1.89979	1.84393	5.72474	2.5028	3.87853	PGSC0003DMT400012547	Transcription factor JERF1	chr06	Transcription factor JERF1	PGSC0003DMP400008715	PGSC0003DMG400004898	PGSC0003DMC400008715	PGSC0003DMT400012547	27.3.3	RNA.regulation of transcription.AP2/EREBP, APETALA2/Ethylene-responsive element binding protein family	pgsc0003dmp400008715	weakly similar to ( 194) AT1G53910 | Symbols: RAP2.12 | RAP2.12; DNA binding / transcription factor | chr1:20135242-20136581 FORWARDweakly similar to ( 184) ERF1_ORYSA Ethylene-responsive transcription factor 1 (Ethylene-responsive element-binding factor 1) (EREBP-1) (OsEREBP1) - Oryza sativa (Rice)moderately similar to ( 207) loc_os06g09390 12006.m091636 protein ethylene-responsive element bindi…
CUST_50691_PI426222305	0.437028	1.14087	1.5213	12.4777	9.21652	3.88665	PGSC0003DMT400022167	Conserved gene of unknown function	chr10	Conserved gene of unknown function	PGSC0003DMP400015116	PGSC0003DMG400008598	PGSC0003DMC400015116	PGSC0003DMT400022167	27.3.99	RNA.regulation of transcription.unclassified	pgsc0003dmp400015116	weakly similar to ( 181) AT2G27930 | Symbols: | binding | chr2:11892369-11893488 FORWARDweakly similar to ( 196) loc_os02g46610 12002.m09698 protein expressed proteinPLATZ PGSC0003DMT400022167
CUST_50687_PI426222305	0.276525	0.573095	1.05592	9.9035	6.35364	2.72949	PGSC0003DMT400022166	Conserved gene of unknown function	chr10	Conserved gene of unknown function	PGSC0003DMP400015115	PGSC0003DMG400008598	PGSC0003DMC400015115	PGSC0003DMT400022166	27.3.99	RNA.regulation of transcription.unclassified	pgsc0003dmp400015115	weakly similar to ( 200) AT2G27930 | Symbols: | binding | chr2:11892369-11893488 FORWARDmoderately similar to ( 202) loc_os02g46610 12002.m09698 protein expressed proteinPLATZ PGSC0003DMT400022166
CUST_49704_PI426222305	0.437496	1.02419	0.891702	4.3589	2.14031	3.31418	PGSC0003DMT400034371	Transcription factor	chr10	Transcription factor	PGSC0003DMP400023375	PGSC0003DMG400013215	PGSC0003DMC400023375	PGSC0003DMT400034371	27.3.25	RNA.regulation of transcription.MYB domain transcription factor family	pgsc0003dmp400023375	weakly similar to ( 125) AT4G38620 | Symbols: ATMYB4, MYB4 | MYB4; DNA binding / transcription factor | chr4:18053866-18054876 FORWARDweakly similar to ( 106) MYB1_HORVU Myb-related protein Hv1 - Hordeum vulgare (Barley)weakly similar to ( 112) loc_os09g36730 12009.m06622 protein myb-related protein Hv1, putative, expressed PGSC0003DMT400034371
CUST_5094_PI426222305	1.94363	1.94618	1.45098	4.68083	3.22758	2.12106	PGSC0003DMT400003844	Nucleic acid binding protein	chr02	Nucleic acid binding protein	PGSC0003DMP400002736	PGSC0003DMG400001519	PGSC0003DMC400002736	PGSC0003DMT400003844	27.3.11	RNA.regulation of transcription.C2H2 zinc finger family	pgsc0003dmp400002736	moderately similar to ( 416) AT5G52010 | Symbols: | zinc finger (C2H2 type) family protein | chr5:21121626-21122816 REVERSEmoderately similar to ( 347) loc_os06g07020 12006.m05427 protein zinc finger, C2H2 type family protein, expressed PGSC0003DMT400003844
CUST_11277_PI426222305	1.78221	1.95558	1.14876	2.03432	2.30477	2.47181	PGSC0003DMT400037716	MYB transcription factor MYB84	chr04	MYB transcription factor MYB84	PGSC0003DMP400025629	PGSC0003DMG400014550	PGSC0003DMC400025629	PGSC0003DMT400037716	27.3.25	RNA.regulation of transcription.MYB domain transcription factor family	pgsc0003dmp400025629	moderately similar to ( 247) AT1G68320 | Symbols: MYB62, AtMYB62, BW62B, BW62C | MYB62 (myb domain protein 62); DNA binding / transcription factor | chr1:25603842-25604884 FORWARDweakly similar to ( 153) MYBA2_ORYSA Myb-related protein MYBAS2 - Oryza sativa (Rice)moderately similar to ( 250) loc_os01g03720 12001.m07009 protein MYB transcription factor, putative, expressed PGSC0003DMT400037716	GO:0005634	GO:0003677;GO:0003682
CUST_48714_PI426222305	1.75293	1.87526	1.36652	16.9028	11.8136	9.34828	PGSC0003DMT400036283	Transcription factor R2R3-MYB		Transcription factor R2R3-MYB	PGSC0003DMP400024607	PGSC0003DMG400013965	PGSC0003DMC400024607	PGSC0003DMT400036283	27.3.25	RNA.regulation of transcription.MYB domain transcription factor family	pgsc0003dmp400024607	weakly similar to ( 137) AT1G66370 | Symbols: MYB113, AtMYB113 | MYB113 (myb domain protein 113); DNA binding / transcription factor | chr1:24753634-24754604 FORWARDweakly similar to ( 108) MYBC_MAIZE Anthocyanin regulatory C1 protein - Zea mays (Maize)weakly similar to ( 108) loc_os03g29614 12003.m08231 protein anthocyanin regulatory C1 protein, putative, expressed PGSC0003DMT400036283
CUST_1520_PI426222305	1.6991	1.56225	1.16661	3.9368	3.48329	3.35099	PGSC0003DMT400052093	Mitochondrial transcription termination factor	chr02	Conserved gene of unknown function	PGSC0003DMP400035107	PGSC0003DMG400020220	PGSC0003DMC400035107	PGSC0003DMT400052093	27.3.99	RNA.regulation of transcription.unclassified	pgsc0003dmp400035107	moderately similar to ( 280) AT4G14605 | Symbols: | FUNCTIONS IN: molecular_function unknown; INVOLVED IN: biological_process unknown; LOCATED IN: cellular_component unknown; EXPRESSED IN: 22 plant structures; EXPRESSED DURING: 13 growth stages; CONTAINS InterPro DOMAIN/s: Mitochodrial transcription termination factor-related (InterPro:IPR003690); BEST Arabidopsis thaliana protein match is: EMB22…
CUST_2632_PI426222305	1.51544	1.7856	1.55996	2.51104	2.5499	2.68658	PGSC0003DMT400048353	TAGL12 transcription factor	chr09	TAGL12 transcription factor	PGSC0003DMP400032741	PGSC0003DMG402018787	PGSC0003DMC400032741	PGSC0003DMT400048353	27.3.24	RNA.regulation of transcription.MADS box transcription factor family	pgsc0003dmp400032741	very weakly similar to (81.6) MAD26_ORYSA MADS-box transcription factor 26 (OsMADS26) (FDRMADS3) (RMADS220) - Oryza sativa (Rice)very weakly similar to (81.6) loc_os08g02070 12008.m04353 protein MADS-box transcription factor 26, putative, expressed PGSC0003DMT400048353
CUST_48717_PI426222305	1.51267	1.22106	1.17489	8.50638	8.45381	4.35734	PGSC0003DMT400019986	HD domain class transcription factor	chr10	HD domain class transcription factor	PGSC0003DMP400013651	PGSC0003DMG400007733	PGSC0003DMC400013651	PGSC0003DMT400019986	27.3.22	RNA.regulation of transcription.HB,Homeobox transcription factor family	pgsc0003dmp400013651	highly similar to ( 958) AT4G00730 | Symbols: ANL2, AHDP | ANL2 (ANTHOCYANINLESS 2); transcription factor/ transcription regulator | chr4:301071-304103 REVERSEhighly similar to ( 905) loc_os02g45250 12002.m09564 protein homeobox protein FWA, putative, expressedSTART START START Homeobox PGSC0003DMT400019986	GO:0005634	GO:0003700;GO:0043565
CUST_1192_PI426222305	1.49266	1.17333	1.10567	7.67335	5.95281	4.15083	PGSC0003DMT400003638	Conserved gene of unknown function	chr02	Conserved gene of unknown function	PGSC0003DMP400002599	PGSC0003DMG400001435	PGSC0003DMC400002599	PGSC0003DMT400003638	27.3.32	RNA.regulation of transcription.WRKY domain transcription factor family	pgsc0003dmp400002599	moderately similar to ( 493) AT3G29185 | Symbols: | unknown protein | chr3:11155092-11157207 REVERSEmoderately similar to ( 420) loc_os03g55164 12003.m101731 protein OsWRKY4 - Superfamily of rice TFs having WRKY and zinc finger domains, expressed PGSC0003DMT400003638	GO:0009507	GO:0003674
CUST_34250_PI426222305	1.44098	1.55229	1.88789	3.65621	2.21248	4.73909	PGSC0003DMT400044878	Transcription factor	chr05	Transcription factor	PGSC0003DMP400030431	PGSC0003DMG400017411	PGSC0003DMC400030431	PGSC0003DMT400044878	27.3.7	RNA.regulation of transcription.C2C2(Zn) CO-like, Constans-like zinc finger family	pgsc0003dmp400030431	moderately similar to ( 295) AT5G48250 | Symbols: | zinc finger (B-box type) family protein | chr5:19561719-19563113 REVERSEmoderately similar to ( 320) loc_os06g19444 12006.m32050 protein CCT motif family protein, expressed PGSC0003DMT400044878
CUST_17789_PI426222305	1.4297	1.77916	1.685	6.77242	3.21379	2.57517	PGSC0003DMT400080049	Pentatricopeptide repeat-containing protein	chr01	Pentatricopeptide repeat-containing protein	PGSC0003DMP400054301	PGSC0003DMG400031170	PGSC0003DMC400054301	PGSC0003DMT400080049	27.3.67	RNA.regulation of transcription.putative transcription regulator	pgsc0003dmp400054301	highly similar to ( 624) AT1G02150 | Symbols: | pentatricopeptide (PPR) repeat-containing protein | chr1:408779-410433 FORWARDmoderately similar to ( 448) loc_os04g46010 12004.m09552 protein tetratricopeptide-like helical, putative, expressed PGSC0003DMT400080049	GO:0009507;GO:0005739
CUST_24592_PI426222305	1.3958	1.42773	1.43205	4.9187	2.25876	2.58172	PGSC0003DMT400054494	Conserved gene of unknown function	chr07	Conserved gene of unknown function	PGSC0003DMP400036666	PGSC0003DMG401021149	PGSC0003DMC400036666	PGSC0003DMT400054494	27.3.99	RNA.regulation of transcription.unclassified	pgsc0003dmp400036666	highly similar to ( 556) AT4G19650 | Symbols: | FUNCTIONS IN: molecular_function unknown; INVOLVED IN: biological_process unknown; LOCATED IN: cellular_component unknown; CONTAINS InterPro DOMAIN/s: Mitochodrial transcription termination factor-related (InterPro:IPR003690); BEST Arabidopsis thaliana protein match is: mitochondrial transcription termination factor-related / mTERF-related (TAIR:AT5…
CUST_46839_PI426222305	1.35077	1.2207	1.45434	2.97228	2.75217	2.24903	PGSC0003DMT400001915	EMB2219	chr01	EMB2219	PGSC0003DMP400001413	PGSC0003DMG400000727	PGSC0003DMC400001413	PGSC0003DMT400001915	27.3.99	RNA.regulation of transcription.unclassified	pgsc0003dmp400001413	highly similar to ( 663) AT2G21710 | Symbols: EMB2219 | EMB2219 (embryo defective 2219) | chr2:9270886-9273307 FORWARDhighly similar to ( 544) loc_os07g04230 12007.m04892 protein EMB2219, putative, expressedmTERF PGSC0003DMT400001915
CUST_6646_PI426222305	1.34671	1.44738	1.79722	4.51453	3.27673	2.74892	PGSC0003DMT400014418	Transcription factor	chr03	Transcription factor	PGSC0003DMP400009958	PGSC0003DMG400005657	PGSC0003DMC400009958	PGSC0003DMT400014418	27.3.25	RNA.regulation of transcription.MYB domain transcription factor family	pgsc0003dmp400009958	moderately similar to ( 318) AT3G18100 | Symbols: MYB4R1, AtMYB4R1 | MYB4R1 (myb domain protein 4R1); transcription factor | chr3:6200689-6204583 FORWARDmoderately similar to ( 327) loc_os07g04700 12007.m29056 protein MYB transcription factor, putative, expressed PGSC0003DMT400014418
CUST_33564_PI426222305	1.33342	1.60571	1.63493	5.72591	4.82882	3.36568	PGSC0003DMT400058193	Pentatricopeptide repeat-containing protein, mitochondrial	chr05	Pentatricopeptide repeat-containing protein, mitochondrial	PGSC0003DMP400039153	PGSC0003DMG400022595	PGSC0003DMC400039153	PGSC0003DMT400058193	27.3.25	RNA.regulation of transcription.MYB domain transcription factor family	pgsc0003dmp400039153	highly similar to ( 803) AT1G59720 | Symbols: CRR28 | CRR28 (CHLORORESPIRATORY REDUCTION28); endonuclease | chr1:21939868-21941784 REVERSEhighly similar to ( 578) loc_os07g09370 12007.m05393 protein pentatricopeptide repeat protein PPR986-12, putative, expressed PGSC0003DMT400058193	GO:0009507;GO:0005739	GO:0004519
CUST_43609_PI426222305	1.32173	1.3375	1.28281	2.5666	2.40039	2.28656	PGSC0003DMT400034368	ZF-HD homeobox protein	chr02	ZF-HD homeobox protein	PGSC0003DMP400023373	PGSC0003DMG400013213	PGSC0003DMC400023373	PGSC0003DMT400034368	27.3.80	RNA.regulation of transcription.zf-HD	pgsc0003dmp400023373	weakly similar to ( 193) AT3G28920 | Symbols: AtHB34 | AtHB34 (ARABIDOPSIS THALIANA HOMEOBOX PROTEIN 34); DNA binding / transcription factor | chr3:10940598-10941536 REVERSEweakly similar to ( 146) loc_os09g29130 12009.m06064 protein ZF-HD protein dimerisation region containing protein, expressedZF-HD_dimer PGSC0003DMT400034368
CUST_41802_PI426222305	1.31221	1.43328	1.04199	2.88611	3.17267	2.66572	PGSC0003DMT400015610	Auxin responsive protein	chr09	Auxin responsive protein	PGSC0003DMP400010816	PGSC0003DMG400006093	PGSC0003DMC400010816	PGSC0003DMT400015610	27.3.40	RNA.regulation of transcription.Aux/IAA family	pgsc0003dmp400010816	moderately similar to ( 286) AT4G14550 | Symbols: IAA14, SLR | IAA14 (INDOLE-3-ACETIC ACID INDUCIBLE 14); protein binding / transcription factor/ transcription repressor | chr4:8348521-8349923 REVERSEmoderately similar to ( 255) AUX28_SOYBN Auxin-induced protein AUX28 - Glycine max (Soybean)moderately similar to ( 234) loc_os12g40890 12012.m07872 protein OsIAA30 - Auxin-responsive Aux/IAA gene fa…
CUST_17977_PI426222305	1.26742	1.47276	1.82507	20.3546	14.4349	7.33249	PGSC0003DMT400018249	Methionine-R-sulfoxide reductase B4 protein	chr07	Methionine-R-sulfoxide reductase B4 protein	PGSC0003DMP400012562	PGSC0003DMG400007084	PGSC0003DMC400012562	PGSC0003DMT400018249	27.3.67	RNA.regulation of transcription.putative transcription regulator	pgsc0003dmp400012562	moderately similar to ( 232) AT1G53670 | Symbols: MSRB1, ATMSRB1 | MSRB1 (methionine sulfoxide reductase B 1); peptide-methionine-(S)-S-oxide reductase | chr1:20036687-20038074 FORWARDmoderately similar to ( 234) loc_os06g27760 12006.m32078 protein peptide methionine sulfoxide reductase msrB, putative, expressedPRK00222 COG0229 SelR PRK05550 PRK05508 PGSC0003DMT400018249
CUST_38909_PI426222305	1.25451	1.65091	1.30777	16.21	10.109	5.07186	PGSC0003DMT400037868	Aspartyl protease family protein	chr03	Aspartyl protease family protein	PGSC0003DMP400025733	PGSC0003DMG400014607	PGSC0003DMC400025733	PGSC0003DMT400037868	27.3.99	RNA.regulation of transcription.unclassified	pgsc0003dmp400025733	moderately similar to ( 489) AT5G37540 | Symbols: | aspartyl protease family protein | chr5:14912862-14914190 FORWARDweakly similar to ( 171) loc_os01g62630 12001.m12384 protein aspartic proteinase nepenthesin-2 precursor, putative, expressed PGSC0003DMT400037868
CUST_17932_PI426222305	1.22614	1.36069	1.05496	10.4916	8.97056	2.53547	PGSC0003DMT400018250	Methionine-R-sulfoxide reductase B4 protein	chr07	Methionine-R-sulfoxide reductase B4 protein	PGSC0003DMP400012563	PGSC0003DMG400007084	PGSC0003DMC400012563	PGSC0003DMT400018250	27.3.67	RNA.regulation of transcription.putative transcription regulator	pgsc0003dmp400012563	moderately similar to ( 243) AT1G53670 | Symbols: MSRB1, ATMSRB1 | MSRB1 (methionine sulfoxide reductase B 1); peptide-methionine-(S)-S-oxide reductase | chr1:20036687-20038074 FORWARDmoderately similar to ( 233) loc_os06g27760 12006.m32078 protein peptide methionine sulfoxide reductase msrB, putative, expressedPRK00222 COG0229 SelR PRK05550 PRK05508 PGSC0003DMT400018250
CUST_46612_PI426222305	1.19712	1.26912	1.08348	8.22955	2.61578	5.3599	PGSC0003DMT400027006	Pentatricopeptide repeat-containing protein	chr02	Pentatricopeptide repeat-containing protein	PGSC0003DMP400018418	PGSC0003DMG400010422	PGSC0003DMC400018418	PGSC0003DMT400027006	27.3.67	RNA.regulation of transcription.putative transcription regulator	pgsc0003dmp400018418	highly similar to ( 793) AT2G35130 | Symbols: | pentatricopeptide (PPR) repeat-containing protein | chr2:14807589-14810164 REVERSEweakly similar to ( 184) RF1_ORYSA Rf1 protein, mitochondrial precursor (PPR protein) (Fertility restorer) (Restorer for CMS) - Oryza sativa (Rice)highly similar to ( 723) loc_os02g07360 12002.m06083 protein expressed protein PGSC0003DMT400027006
CUST_13821_PI426222305	1.18533	1.93733	1.78681	12.9596	7.4612	5.62888	PGSC0003DMT400040350	Class II knotted-like homeobox protein	chr08	Class II knotted-like homeobox protein	PGSC0003DMP400027372	PGSC0003DMG400015622	PGSC0003DMC400027372	PGSC0003DMT400040350	27.3.22	RNA.regulation of transcription.HB,Homeobox transcription factor family	pgsc0003dmp400027372	moderately similar to ( 473) AT5G25220 | Symbols: KNAT3 | KNAT3 (KNOTTED1-LIKE HOMEOBOX GENE 3); transcription activator/ transcription factor | chr5:8736208-8738087 FORWARDmoderately similar to ( 462) KNAP3_MALDO Homeobox protein knotted-1-like 3 (KNAP3) - Malus domestica (Apple) (Malus sylvestris)moderately similar to ( 430) loc_os08g19650 12008.m06032 protein homeobox protein knotted-1-like 3,…
CUST_6312_PI426222305	1.18085	1.31039	1.21113	4.4209	4.34475	2.43731	PGSC0003DMT400014352	Aspartic proteinase nepenthesin-1	chr03	Aspartic proteinase nepenthesin-1	PGSC0003DMP400009908	PGSC0003DMG400005628	PGSC0003DMC400009908	PGSC0003DMT400014352	27.3.99	RNA.regulation of transcription.unclassified	pgsc0003dmp400009908	moderately similar to ( 446) AT3G18490 | Symbols: | aspartyl protease family protein | chr3:6349090-6350592 REVERSEmoderately similar to ( 386) loc_os01g04710 12001.m42852 protein aspartic proteinase nepenthesin-1 precursor, putative, expressedAsp PGSC0003DMT400014352
CUST_1004_PI426222305	1.15365	1.69993	1.53743	6.23954	6.50161	5.35871	PGSC0003DMT400032848	Conserved gene of unknown function	chr02	Conserved gene of unknown function	PGSC0003DMP400022350	PGSC0003DMG400012618	PGSC0003DMC400022350	PGSC0003DMT400032848	27.3.7	RNA.regulation of transcription.C2C2(Zn) CO-like, Constans-like zinc finger family	pgsc0003dmp400022350	weakly similar to ( 115) AT5G14370 | Symbols: | LOCATED IN: chloroplast; EXPRESSED IN: 21 plant structures; EXPRESSED DURING: 13 growth stages; CONTAINS InterPro DOMAIN/s: CCT domain (InterPro:IPR010402); BEST Arabidopsis thaliana protein match is: CIL (TAIR:AT4G25990.1); Has 1815 Blast hits to 1506 proteins in 139 species: Archae - 0; Bacteria - 8; Metazoa - 291; Fungi - 53; Plants - 1145; Virus…		GO:0005515
CUST_24357_PI426222305	1.12625	1.42261	1.18873	2.6499	2.32668	2.10011	PGSC0003DMT400036063	Conserved gene of unknown function	chr12	Disease resistance protein Gpa2	PGSC0003DMP400024496	PGSC0003DMG400013889	PGSC0003DMC400024496	PGSC0003DMT400036063	27.3.67	RNA.regulation of transcription.putative transcription regulator	pgsc0003dmp400024496	moderately similar to ( 299) AT4G28830 | Symbols: | methyltransferase/ nucleic acid binding | chr4:14232490-14233696 FORWARDmoderately similar to ( 288) loc_os06g06730 12006.m05398 protein S-adenosylmethionine-dependent methyltransferase, putative, expressedCOG2263 PGSC0003DMT400036063
CUST_5513_PI426222305	1.11035	1.21396	1.95842	2.79001	2.96265	2.25651	PGSC0003DMT400022735	Prf interactor 30137	chr09	Prf interactor 30137	PGSC0003DMP400015489	PGSC0003DMG400008818	PGSC0003DMC400015489	PGSC0003DMT400022735	27.3.6	RNA.regulation of transcription.bHLH,Basic Helix-Loop-Helix family	pgsc0003dmp400015489	weakly similar to ( 191) AT1G06150 | Symbols: | transcription factor | chr1:1869228-1873194 REVERSEweakly similar to ( 200) loc_os12g06330 12012.m04623 protein expressed protein PGSC0003DMT400022735
CUST_16819_PI426222305	1.08394	1.17264	1.03711	5.00958	2.20032	3.01763	PGSC0003DMT400069191	NAD dependent epimerase/dehydratase	chr06	NAD dependent epimerase/dehydratase	PGSC0003DMP400046720	PGSC0003DMG400026913	PGSC0003DMC400046720	PGSC0003DMT400069191	27.3.99	RNA.regulation of transcription.unclassified	pgsc0003dmp400046720	highly similar to ( 636) AT1G09340 | Symbols: CRB, CSP41B | CRB (CHLOROPLAST RNA BINDING); binding / catalytic/ coenzyme binding | chr1:3015473-3018035 FORWARDhighly similar to ( 607) loc_os12g23180 12012.m26701 protein RNA binding protein, putative, expressedWcaG Epimerase PGSC0003DMT400069191
CUST_23281_PI426222305	1.05132	1.36999	1.3977	3.72033	3.19872	2.75275	PGSC0003DMT400002603	Sequence-specific DNA binding / transcription factor	chr11	Sequence-specific DNA binding / transcription factor	PGSC0003DMP400001894	PGSC0003DMG400000999	PGSC0003DMC400001894	PGSC0003DMT400002603	27.3.67	RNA.regulation of transcription.putative transcription regulator	pgsc0003dmp400001894	highly similar to ( 666) AT4G12750 | Symbols: | sequence-specific DNA binding / transcription factor | chr4:7498009-7503643 REVERSEweakly similar to ( 137) loc_os05g48820 12005.m08953 protein DDT domain containing protein, expressed PGSC0003DMT400002603	GO:0005634
CUST_45808_PI426222305	1.05019	1.83077	1.40857	10.0331	2.13518	8.2068	PGSC0003DMT400050277	Pentatricopeptide repeat-containing protein	chr03	Pentatricopeptide repeat-containing protein	PGSC0003DMP400033938	PGSC0003DMG400019530	PGSC0003DMC400033938	PGSC0003DMT400050277	27.3.25	RNA.regulation of transcription.MYB domain transcription factor family	pgsc0003dmp400033938	moderately similar to ( 219) AT3G47530 | Symbols: | pentatricopeptide (PPR) repeat-containing protein | chr3:17517382-17519157 REVERSEmoderately similar to ( 216) loc_os08g33700 12008.m07360 protein selenium-binding protein-like, putative, expressed PGSC0003DMT400050277	GO:0043231
CUST_33575_PI426222305	1.04555	1.60322	1.30387	14.4227	12.5361	3.14247	PGSC0003DMT400045482	Zinc knuckle (CCHC-type) family protein	chr05	Zinc knuckle (CCHC-type) family protein	PGSC0003DMP400030820	PGSC0003DMG400017644	PGSC0003DMC400030820	PGSC0003DMT400045482	27.3.11	RNA.regulation of transcription.C2H2 zinc finger family	pgsc0003dmp400030820	moderately similar to ( 422) AT5G20220 | Symbols: | zinc knuckle (CCHC-type) family protein | chr5:6822208-6825771 FORWARDmoderately similar to ( 374) loc_os01g51710 12001.m11349 protein zinc finger protein, putative, expressed PGSC0003DMT400045482	GO:0005634	GO:0008270;GO:0003676
CUST_41784_PI426222305	1.0412	1.31761	1.3588	3.61421	2.09208	2.01801	PGSC0003DMT400015655	Nt-iaa2.3 deduced protein	chr09	Nt-iaa2.3 deduced protein	PGSC0003DMP400010843	PGSC0003DMG400006108	PGSC0003DMC400010843	PGSC0003DMT400015655	27.3.40	RNA.regulation of transcription.Aux/IAA family	pgsc0003dmp400010843	moderately similar to ( 232) AT1G04240 | Symbols: SHY2, IAA3 | SHY2 (SHORT HYPOCOTYL 2); transcription factor | chr1:1128564-1129319 REVERSEmoderately similar to ( 233) IAA4_PEA Auxin-induced protein IAA4 - Pisum sativum (Garden pea)weakly similar to ( 162) loc_os12g40900 12012.m07873 protein OsIAA31 - Auxin-responsive Aux/IAA gene family member, expressedAUX_IAA PGSC0003DMT400015655
CUST_6602_PI426222305	1.03439	1.18695	1.43008	4.35126	2.36856	3.0221	PGSC0003DMT400036705	Aspartic proteinase nepenthesin-1	chr03	Aspartic proteinase nepenthesin-1	PGSC0003DMP400024892	PGSC0003DMG400014156	PGSC0003DMC400024892	PGSC0003DMT400036705	27.3.99	RNA.regulation of transcription.unclassified	pgsc0003dmp400024892	moderately similar to ( 499) AT1G79720 | Symbols: | aspartyl protease family protein | chr1:29997259-29998951 REVERSEvery weakly similar to (82.0) ASP1_ORYSA Aspartic proteinase Asp1 precursor (EC 3.4.23.-) (OsAsp1) (OSAP1) (Nucellin-like protein) - Oryza sativa (Rice)moderately similar to ( 412) loc_os09g25570 12009.m05709 protein aspartic proteinase nepenthesin-2 precursor, putative, expressedA…
CUST_11241_PI426222305	1.03141	1.25682	1.35132	9.42478	8.05965	5.065	PGSC0003DMT400037755	Transcription factor	chr05	Transcription factor	PGSC0003DMP400025662	PGSC0003DMG400014566	PGSC0003DMC400025662	PGSC0003DMT400037755	27.3.7	RNA.regulation of transcription.C2C2(Zn) CO-like, Constans-like zinc finger family	pgsc0003dmp400025662	moderately similar to ( 239) AT1G25440 | Symbols: | zinc finger (B-box type) family protein | chr1:8933939-8935284 REVERSEmoderately similar to ( 208) loc_os06g15330 12006.m06246 protein zinc finger protein CONSTANS-LIKE 16, putative, expressed PGSC0003DMT400037755	GO:0016020;GO:0005622	GO:0005515;GO:0008270
CUST_31172_PI426222305	1.03091	1.75275	1.30901	8.33181	2.30863	6.67376	PGSC0003DMT400063965	Pentatricopeptide repeat-containing protein	chr04	Pentatricopeptide repeat-containing protein	PGSC0003DMP400043095	PGSC0003DMG400024862	PGSC0003DMC400043095	PGSC0003DMT400063965	27.3.25	RNA.regulation of transcription.MYB domain transcription factor family	pgsc0003dmp400043095	highly similar to ( 779) AT3G26540 | Symbols: | pentatricopeptide (PPR) repeat-containing protein | chr3:9744542-9746644 REVERSEhighly similar to ( 592) loc_os04g35650 12004.m08654 protein vegetative storage protein, putative, expressed PGSC0003DMT400063965
CUST_2778_PI426222305	1.02825	1.15551	1.09076	3.18984	2.47048	6.01617	PGSC0003DMT400000026	Transcription factor AGL20	chr01	Transcription factor	PGSC0003DMP400000025	PGSC0003DMG400000008	PGSC0003DMC400000025	PGSC0003DMT400000026	27.3.24	RNA.regulation of transcription.MADS box transcription factor family	pgsc0003dmp400000025	weakly similar to ( 122) AT2G45660 | Symbols: AGL20, SOC1 | AGL20 (AGAMOUS-LIKE 20); transcription factor | chr2:18807799-18810193 REVERSEweakly similar to ( 119) MAD50_ORYSA MADS-box transcription factor 50 (OsMADS50) (Protein SUPPRESSOR OF CONSTANS OVEREXPRESSION 1-like) (OsSOC1) (Protein AGAMOUS-like 20) (RMADS208) - Oryza sativa (Rice)weakly similar to ( 118) loc_os10g39130 12010.m21952 prote…
CUST_26942_PI426222305	1.00533	1.53298	1.19539	3.26185	2.1616	3.189	PGSC0003DMT400052713	Conserved gene of unknown function	chr06	Conserved gene of unknown function	PGSC0003DMP400035537	PGSC0003DMG400020461	PGSC0003DMC400035537	PGSC0003DMT400052713	27.3.25	RNA.regulation of transcription.MYB domain transcription factor family	pgsc0003dmp400035537	moderately similar to ( 489) AT5G66520 | Symbols: | pentatricopeptide (PPR) repeat-containing protein | chr5:26551879-26553741 FORWARDweakly similar to ( 103) RF1_ORYSA Rf1 protein, mitochondrial precursor (PPR protein) (Fertility restorer) (Restorer for CMS) - Oryza sativa (Rice)highly similar to ( 682) loc_os03g60690 12003.m10958 protein pentatricopeptide repeat-containing protein, putative, ex…
CUST_10565_PI426222305	0.979547	1.05804	1.38432	2.94933	2.59423	2.02124	PGSC0003DMT400031944	Transcription factor	chr08	Transcription factor	PGSC0003DMP400021691	PGSC0003DMG402012256	PGSC0003DMC400021691	PGSC0003DMT400031944	27.3.60	RNA.regulation of transcription.NIN-like bZIP-related family	pgsc0003dmp400021691	highly similar to ( 716) AT1G64530 | Symbols: | RWP-RK domain-containing protein | chr1:23959820-23962896 FORWARDhighly similar to ( 634) loc_os01g13540 12001.m07963 protein NIN-like protein 1, putative, expressed PGSC0003DMT400031944
CUST_20646_PI426222305	0.974522	1.99732	1.40982	8.38407	2.00026	4.17431	PGSC0003DMT400012029	Gene of unknown function	chr12	Gene of unknown function	PGSC0003DMP400008378	PGSC0003DMG400004720	PGSC0003DMC400008378	PGSC0003DMT400012029	27.3.25	RNA.regulation of transcription.MYB domain transcription factor family	pgsc0003dmp400008378	weakly similar to ( 135) AT1G20230 | Symbols: | pentatricopeptide (PPR) repeat-containing protein | chr1:7009570-7011852 FORWARDweakly similar to ( 139) loc_os12g15460 12012.m05506 protein pentatricopeptide repeat protein PPR986-12, putative, expressed PGSC0003DMT400012029
CUST_51373_PI426222305	0.96817	1.72758	1.18748	2.32165	2.33213	2.44445	PGSC0003DMT400011189	Zinc ion binding protein	chr03	Zinc ion binding protein	PGSC0003DMP400007780	PGSC0003DMG400004381	PGSC0003DMC400007780	PGSC0003DMT400011189	27.3.50	RNA.regulation of transcription.General Transcription	pgsc0003dmp400007780	moderately similar to ( 389) AT4G35540 | Symbols: | transcription regulator/ zinc ion binding | chr4:16873939-16875522 FORWARDweakly similar to ( 187) loc_os08g42020 12008.m080218 protein expressed protein PGSC0003DMT400011189
CUST_36697_PI426222305	0.958969	1.07263	1.05375	2.88517	2.89912	2.99705	PGSC0003DMT400004049	Pentatricopeptide repeat-containing protein	chr01	Pentatricopeptide repeat-containing protein	PGSC0003DMP400002895	PGSC0003DMG400001599	PGSC0003DMC400002895	PGSC0003DMT400004049	27.3	RNA.regulation of transcription	pgsc0003dmp400002895	highly similar to ( 540) AT4G34830 | Symbols: | LOCATED IN: chloroplast; EXPRESSED IN: 21 plant structures; EXPRESSED DURING: 13 growth stages; CONTAINS InterPro DOMAIN/s: Pentatricopeptide repeat (InterPro:IPR002885); BEST Arabidopsis thaliana protein match is: EMB2745 (EMBRYO DEFECTIVE 2745) (TAIR:AT5G39710.1); Has 19818 Blast hits to 5849 proteins in 171 species: Archae - 3; Bacteria - 16; Met…
CUST_25651_PI426222305	0.958179	1.0676	1.05024	3.81477	2.62312	2.71672	PGSC0003DMT400037355	Extracellular ligand-gated ion channel	chr10	Extracellular ligand-gated ion channel	PGSC0003DMP400025390	PGSC0003DMG400014415	PGSC0003DMC400025390	PGSC0003DMT400037355	27.3.3	RNA.regulation of transcription.AP2/EREBP, APETALA2/Ethylene-responsive element binding protein family	pgsc0003dmp400025390	moderately similar to ( 383) AT3G20300 | Symbols: | unknown protein | chr3:7079832-7081809 REVERSEmoderately similar to ( 276) loc_os06g42850 12006.m08815 protein expressed protein PGSC0003DMT400037355
CUST_3488_PI426222305	0.950469	1.17869	1.62324	5.06198	2.05234	4.68343	PGSC0003DMT400064306	Tuber-specific and sucrose-responsive element binding factor	chr10	Tuber-specific and sucrose-responsive element binding factor	PGSC0003DMP400043359	PGSC0003DMG400024983	PGSC0003DMC400043359	PGSC0003DMT400064306	27.3.25	RNA.regulation of transcription.MYB domain transcription factor family	pgsc0003dmp400043359	moderately similar to ( 234) AT5G67300 | Symbols: ATMYBR1, ATMYB44, MYBR1 | MYBR1 (MYB DOMAIN PROTEIN R1); DNA binding / transcription factor | chr5:26854109-26855026 FORWARDweakly similar to ( 110) GAM1_ORYSA Transcription factor GAMYB (OsGAMyb) - Oryza sativa (Rice)moderately similar to ( 204) loc_os09g01960 12009.m03570 protein sucrose responsive element binding protein, putative, expressedREB…
CUST_42975_PI426222305	0.925767	1.35163	1.2881	2.96078	2.02976	2.64613	PGSC0003DMT400015690	Conserved gene of unknown function	chr07	Conserved gene of unknown function	PGSC0003DMP400010868	PGSC0003DMG400006129	PGSC0003DMC400010868	PGSC0003DMT400015690	27.3.35	RNA.regulation of transcription.bZIP transcription factor family	pgsc0003dmp400010868	moderately similar to ( 421) AT2G19090 | Symbols: | unknown protein | chr2:8265178-8267879 REVERSEmoderately similar to ( 249) loc_os08g40830 12008.m61965 protein pumilio domain-containing protein PPD1, putative, expressedDUF632 DUF630 PGSC0003DMT400015690
CUST_3089_PI426222305	0.918635	1.86721	1.54045	5.35531	2.24989	3.38043	PGSC0003DMT400000225	Pentatricopeptide repeat-containing protein	chr01	Pentatricopeptide repeat-containing protein	PGSC0003DMP400000165	PGSC0003DMG400000068	PGSC0003DMC400000165	PGSC0003DMT400000225	27.3.25	RNA.regulation of transcription.MYB domain transcription factor family	pgsc0003dmp400000165	highly similar to ( 899) AT4G37170 | Symbols: | pentatricopeptide (PPR) repeat-containing protein | chr4:17498580-17500655 REVERSEweakly similar to ( 107) RF1_ORYSA Rf1 protein, mitochondrial precursor (PPR protein) (Fertility restorer) (Restorer for CMS) - Oryza sativa (Rice)highly similar to ( 704) loc_os03g13230 12003.m06769 protein CRR2, putative, expressed PGSC0003DMT400000225
CUST_3831_PI426222305	0.902892	1.38009	1.26639	4.05641	2.58253	2.90857	PGSC0003DMT400045091	DNA binding protein	chr04	DNA binding protein	PGSC0003DMP400030542	PGSC0003DMG400017485	PGSC0003DMC400030542	PGSC0003DMT400045091	27.3.3	RNA.regulation of transcription.AP2/EREBP, APETALA2/Ethylene-responsive element binding protein family	pgsc0003dmp400030542	weakly similar to ( 140) AT4G13040 | Symbols: | AP2 domain-containing transcription factor family protein | chr4:7613720-7615310 FORWARDweakly similar to ( 162) loc_os02g29550 12002.m33690 protein DNA binding protein, putative, expressed PGSC0003DMT400045091	GO:0005634	GO:0003700;GO:0003677
CUST_13860_PI426222305	0.893268	1.2054	1.07953	6.16152	4.6154	3.08766	PGSC0003DMT400040349	Class II knotted-like homeobox protein	chr08	Class II knotted-like homeobox protein	PGSC0003DMP400027371	PGSC0003DMG400015622	PGSC0003DMC400027371	PGSC0003DMT400040349	27.3.22	RNA.regulation of transcription.HB,Homeobox transcription factor family	pgsc0003dmp400027371	moderately similar to ( 303) AT5G25220 | Symbols: KNAT3 | KNAT3 (KNOTTED1-LIKE HOMEOBOX GENE 3); transcription activator/ transcription factor | chr5:8736208-8738087 FORWARDmoderately similar to ( 294) KNAP3_MALDO Homeobox protein knotted-1-like 3 (KNAP3) - Malus domestica (Apple) (Malus sylvestris)moderately similar to ( 265) loc_os08g19650 12008.m06032 protein homeobox protein knotted-1-like 3,…
CUST_28562_PI426222305	0.872487	1.17765	1.36009	3.06428	3.35255	2.95646	PGSC0003DMT400009848	Zinc finger protein 593	chr08	Zinc finger protein 593	PGSC0003DMP400006859	PGSC0003DMG400003863	PGSC0003DMC400006859	PGSC0003DMT400009848	27.3.99	RNA.regulation of transcription.unclassified	pgsc0003dmp400006859	weakly similar to ( 174) AT2G36930 | Symbols: | zinc finger (C2H2 type) family protein | chr2:15510002-15511347 REVERSEweakly similar to ( 167) loc_os08g45040 12008.m080242 protein zinc finger protein 593, putative, expressed PGSC0003DMT400009848	GO:0005622	GO:0008270;GO:0003676
CUST_42966_PI426222305	0.867252	1.79289	1.15533	4.06362	2.32458	3.14589	PGSC0003DMT400015689	Conserved gene of unknown function	chr07	Conserved gene of unknown function	PGSC0003DMP400010867	PGSC0003DMG400006129	PGSC0003DMC400010867	PGSC0003DMT400015689	27.3.35	RNA.regulation of transcription.bZIP transcription factor family	pgsc0003dmp400010867	moderately similar to ( 422) AT2G19090 | Symbols: | unknown protein | chr2:8265178-8267879 REVERSEmoderately similar to ( 249) loc_os08g40830 12008.m61965 protein pumilio domain-containing protein PPD1, putative, expressedDUF632 DUF630 PGSC0003DMT400015689
CUST_33449_PI426222305	0.782187	1.39424	1.13431	6.32151	3.60686	3.23728	PGSC0003DMT400058194	Pentatricopeptide repeat-containing protein, mitochondrial	chr05	Pentatricopeptide repeat-containing protein, mitochondrial	PGSC0003DMP400039154	PGSC0003DMG400022595	PGSC0003DMC400039154	PGSC0003DMT400058194	27.3.25	RNA.regulation of transcription.MYB domain transcription factor family	pgsc0003dmp400039154	highly similar to ( 704) AT1G59720 | Symbols: CRR28 | CRR28 (CHLORORESPIRATORY REDUCTION28); endonuclease | chr1:21939868-21941784 REVERSEhighly similar to ( 574) loc_os07g09370 12007.m05393 protein pentatricopeptide repeat protein PPR986-12, putative, expressed PGSC0003DMT400058194
CUST_48722_PI426222305	0.751154	1.34935	1.17049	5.65046	7.07055	2.31068	PGSC0003DMT400019987	Homeobox protein	chr10	HD domain class transcription factor	PGSC0003DMP400013652	PGSC0003DMG400007733	PGSC0003DMC400013652	PGSC0003DMT400019987	27.3.22	RNA.regulation of transcription.HB,Homeobox transcription factor family	pgsc0003dmp400013652	highly similar to ( 579) AT3G61150 | Symbols: HDG1, HD-GL2-1 | HDG1 (HOMEODOMAIN GLABROUS 1); DNA binding / transcription factor | chr3:22630769-22634875 FORWARDhighly similar to ( 561) loc_os02g45250 12002.m09564 protein homeobox protein FWA, putative, expressedSTART START START PGSC0003DMT400019987
CUST_6668_PI426222305	0.641293	1.21441	1.68969	8.1742	6.93378	3.86	PGSC0003DMT400036706	Aspartic proteinase nepenthesin-1	chr03	Aspartic proteinase nepenthesin-1	PGSC0003DMP400024893	PGSC0003DMG400014156	PGSC0003DMC400024893	PGSC0003DMT400036706	27.3.99	RNA.regulation of transcription.unclassified	pgsc0003dmp400024893	highly similar to ( 506) AT1G79720 | Symbols: | aspartyl protease family protein | chr1:29997259-29998951 REVERSEvery weakly similar to (82.8) ASP1_ORYSA Aspartic proteinase Asp1 precursor (EC 3.4.23.-) (OsAsp1) (OSAP1) (Nucellin-like protein) - Oryza sativa (Rice)moderately similar to ( 424) loc_os09g25570 12009.m05709 protein aspartic proteinase nepenthesin-2 precursor, putative, expressedAsp P…
CUST_48219_PI426222305	1.16072	0.855659	1.17292	5.34995	2.75238	2.59219	PGSC0003DMT400055887	Pentatricopeptide repeat-containing protein	chr02	Pentatricopeptide repeat-containing protein	PGSC0003DMP400037637	PGSC0003DMG400021711	PGSC0003DMC400037637	PGSC0003DMT400055887	27.3	RNA.regulation of transcription	pgsc0003dmp400037637	moderately similar to ( 217) AT1G55890 | Symbols: | pentatricopeptide (PPR) repeat-containing protein | chr1:20901364-20902560 FORWARDweakly similar to ( 105) RF1_ORYSA Rf1 protein, mitochondrial precursor (PPR protein) (Fertility restorer) (Restorer for CMS) - Oryza sativa (Rice)weakly similar to ( 156) loc_os01g57630 12001.m43223 protein membrane-associated salt-inducible protein like, putative…
CUST_17185_PI426222305	0.917225	0.723613	1.20455	6.95613	6.80683	2.86714	PGSC0003DMT400057840	EMB175	chr01	EMB175	PGSC0003DMP400038943	PGSC0003DMG400022458	PGSC0003DMC400038943	PGSC0003DMT400057840	27.3.25	RNA.regulation of transcription.MYB domain transcription factor family	pgsc0003dmp400038943	highly similar to ( 892) AT5G03800 | Symbols: EMB175, emb1899, EMB166 | EMB175 (EMBRYO DEFECTIVE 175); catalytic | chr5:1010894-1013584 REVERSEvery weakly similar to (97.1) RF1_ORYSA Rf1 protein, mitochondrial precursor (PPR protein) (Fertility restorer) (Restorer for CMS) - Oryza sativa (Rice)highly similar to ( 779) loc_os07g07620 12007.m05221 protein pentatricopeptide repeat protein PPR868-14,…	GO:0016020;GO:0009507	GO:0003824
CUST_42726_PI426222305	0.799966	0.788484	1.22005	6.1193	3.88568	4.18581	PGSC0003DMT400052462	PTAC13	chr09	PTAC13	PGSC0003DMP400035368	PGSC0003DMG400020362	PGSC0003DMC400035368	PGSC0003DMT400052462	27.3.99	RNA.regulation of transcription.unclassified	pgsc0003dmp400035368	moderately similar to ( 316) AT3G09210 | Symbols: PTAC13 | PTAC13 (PLASTID TRANSCRIPTIONALLY ACTIVE13); transcription elongation regulator | chr3:2825422-2826850 REVERSEmoderately similar to ( 207) loc_os03g61030 12003.m35487 protein transcription termination factor nusG family protein, expressed PGSC0003DMT400052462
CUST_13108_PI426222305	0.783641	0.783065	1.08749	3.41017	3.21219	2.53275	PGSC0003DMT400007543	Nucleosome-binding protein	chr12	Nucleosome-binding protein	PGSC0003DMP400005244	PGSC0003DMG400002913	PGSC0003DMC400005244	PGSC0003DMT400007543	27.3.59	RNA.regulation of transcription.Methyl binding domain proteins	pgsc0003dmp400005244	very weakly similar to (84.3) AT3G15790 | Symbols: MBD11, ATMBD11 | MBD11; DNA binding / methyl-CpG binding | chr3:5343209-5344386 FORWARD PGSC0003DMT400007543
CUST_40647_PI426222305	1.18861	1.24034	0.733682	3.74398	3.95339	2.26295	PGSC0003DMT400080487	MTERF	chr02	MTERF	PGSC0003DMP400054590	PGSC0003DMG400031337	PGSC0003DMC400054590	PGSC0003DMT400080487	27.3.99	RNA.regulation of transcription.unclassified	pgsc0003dmp400054590	moderately similar to ( 350) AT2G34620 | Symbols: | mitochondrial transcription termination factor-related / mTERF-related | chr2:14577196-14578203 FORWARDmoderately similar to ( 303) loc_os03g57149 12003.m101627 protein mTERF-like protein, putative, expressedmTERF PGSC0003DMT400080487
CUST_36767_PI426222305	1.07216	1.51354	0.941261	4.77595	2.44676	4.25496	PGSC0003DMT400015803	Transcription factor	chr01	Transcription factor	PGSC0003DMP400010956	PGSC0003DMG400006176	PGSC0003DMC400010956	PGSC0003DMT400015803	27.3.25	RNA.regulation of transcription.MYB domain transcription factor family	pgsc0003dmp400010956	moderately similar to ( 306) AT4G38620 | Symbols: ATMYB4, MYB4 | MYB4; DNA binding / transcription factor | chr4:18053866-18054876 FORWARDmoderately similar to ( 292) MYB1_HORVU Myb-related protein Hv1 - Hordeum vulgare (Barley)moderately similar to ( 306) loc_os09g36730 12009.m06622 protein myb-related protein Hv1, putative, expressed PGSC0003DMT400015803
CUST_33509_PI426222305	1.06687	1.17154	0.904873	13.6935	12.6822	3.97829	PGSC0003DMT400045483	Zinc knuckle (CCHC-type) family protein	chr05	Zinc knuckle (CCHC-type) family protein	PGSC0003DMP400030821	PGSC0003DMG400017644	PGSC0003DMC400030821	PGSC0003DMT400045483	27.3.11	RNA.regulation of transcription.C2H2 zinc finger family	pgsc0003dmp400030821	weakly similar to ( 173) AT5G20220 | Symbols: | zinc knuckle (CCHC-type) family protein | chr5:6822208-6825771 FORWARDweakly similar to ( 166) loc_os01g51710 12001.m11349 protein zinc finger protein, putative, expressed PGSC0003DMT400045483
CUST_46601_PI426222305	1.0667	1.40995	0.88578	7.66229	2.75003	2.7409	PGSC0003DMT400027007	Pentatricopeptide repeat-containing protein	chr02	Pentatricopeptide repeat-containing protein	PGSC0003DMP400018419	PGSC0003DMG400010422	PGSC0003DMC400018419	PGSC0003DMT400027007	27.3.67	RNA.regulation of transcription.putative transcription regulator	pgsc0003dmp400018419	highly similar to ( 632) AT2G35130 | Symbols: | pentatricopeptide (PPR) repeat-containing protein | chr2:14807589-14810164 REVERSEweakly similar to ( 181) RF1_ORYSA Rf1 protein, mitochondrial precursor (PPR protein) (Fertility restorer) (Restorer for CMS) - Oryza sativa (Rice)highly similar to ( 580) loc_os02g07360 12002.m06083 protein expressed protein PGSC0003DMT400027007
CUST_24626_PI426222305	1.05059	1.57426	0.801712	3.91132	2.33922	3.06546	PGSC0003DMT400054381	Nucleic acid binding protein	chr07	Nucleic acid binding protein	PGSC0003DMP400036584	PGSC0003DMG400021105	PGSC0003DMC400036584	PGSC0003DMT400054381	27.3.67	RNA.regulation of transcription.putative transcription regulator	pgsc0003dmp400036584	weakly similar to ( 122) AT1G30680 | Symbols: | toprim domain-containing protein | chr1:10881665-10886060 FORWARDweakly similar to ( 124) loc_os06g45980 12006.m09126 protein nucleic acid binding protein, putative, expressed PGSC0003DMT400054381
CUST_39607_PI426222305	1.0181	1.17214	0.989723	3.29443	2.10393	2.34031	PGSC0003DMT400028058	MYC1	chr10	MYC1	PGSC0003DMP400019127	PGSC0003DMG401010822	PGSC0003DMC400019127	PGSC0003DMT400028058	27.3.6	RNA.regulation of transcription.bHLH,Basic Helix-Loop-Helix family	pgsc0003dmp400019127	weakly similar to ( 155) AT4G00870 | Symbols: | basic helix-loop-helix (bHLH) family protein | chr4:362230-363639 REVERSEvery weakly similar to ( 100) loc_os01g50940 12001.m11275 protein DNA binding protein, putative, expressed PGSC0003DMT400028058
CUST_39676_PI426222305	1.0178	1.99801	0.931779	9.2484	2.92525	4.12623	PGSC0003DMT400028056	DNA binding protein	chr10	MYC1	PGSC0003DMP400019125	PGSC0003DMG401010822	PGSC0003DMC400019125	PGSC0003DMT400028056	27.3.6	RNA.regulation of transcription.bHLH,Basic Helix-Loop-Helix family	pgsc0003dmp400019125	very weakly similar to (95.1) AT1G32640 | Symbols: ATMYC2, RD22BP1, JAI1, JIN1, MYC2, ZBF1 | MYC2; DNA binding / transcription activator/ transcription factor | chr1:11799042-11800913 REVERSEvery weakly similar to (96.3) loc_os10g42430 12010.m06996 protein transcription factor MYC7E, putative, expressed PGSC0003DMT400028056
CUST_40008_PI426222305	1.0144	1.55694	0.970572	11.9998	3.28471	2.86105	PGSC0003DMT400011167	Myb 12 transcription factor	chr12	Myb 12 transcription factor	PGSC0003DMP400007770	PGSC0003DMG400004371	PGSC0003DMC400007770	PGSC0003DMT400011167	27.3.25	RNA.regulation of transcription.MYB domain transcription factor family	pgsc0003dmp400007770	moderately similar to ( 205) AT2G47460 | Symbols: MYB12, ATMYB12, PFG1 | MYB12 (MYB DOMAIN PROTEIN 12); DNA binding / transcription activator/ transcription factor | chr2:19476438-19479242 FORWARDmoderately similar to ( 202) MYBP_MAIZE Myb-related protein P - Zea mays (Maize)weakly similar to ( 190) loc_os03g19120 12003.m07329 protein yellow seed1, putative PGSC0003DMT400011167
CUST_24568_PI426222305	1.00236	1.09184	0.98218	4.8029	2.41018	2.5029	PGSC0003DMT400054353	PTAC12 (PLASTID TRANSCRIPTIONALLY ACTIVE12)	chr02	PTAC12 (PLASTID TRANSCRIPTIONALLY ACTIVE12)	PGSC0003DMP400036560	PGSC0003DMG402021097	PGSC0003DMC400036560	PGSC0003DMT400054353	27.3	RNA.regulation of transcription	pgsc0003dmp400036560	highly similar to ( 572) AT2G34640 | Symbols: PTAC12 | PTAC12 (PLASTID TRANSCRIPTIONALLY ACTIVE12) | chr2:14582061-14584345 REVERSEmoderately similar to ( 498) loc_os01g56350 12001.m43211 protein expressed protein PGSC0003DMT400054353
CUST_15447_PI426222305	0.994312	1.56709	0.700984	97.0114	59.4861	12.5261	PGSC0003DMT400037470	Pollen-specific C2 domain containing protein	chr12	Pollen-specific C2 domain containing protein	PGSC0003DMP400025473	PGSC0003DMG400014458	PGSC0003DMC400025473	PGSC0003DMT400037470	27.3.11	RNA.regulation of transcription.C2H2 zinc finger family	pgsc0003dmp400025473	moderately similar to ( 235) AT3G17980 | Symbols: | C2 domain-containing protein | chr3:6152417-6153115 FORWARDweakly similar to ( 196) loc_os02g22130 12002.m07451 protein GTPase activating protein, putative, expressedC2 C2 PGSC0003DMT400037470
CUST_30852_PI426222305	0.967292	1.13699	0.89478	9.23111	2.6141	2.51674	PGSC0003DMT400018840	MYB12	chr06	MYB12	PGSC0003DMP400012934	PGSC0003DMG400007304	PGSC0003DMC400012934	PGSC0003DMT400018840	27.3.25	RNA.regulation of transcription.MYB domain transcription factor family	pgsc0003dmp400012934	weakly similar to ( 125) AT5G49330 | Symbols: AtMYB111 | AtMYB111 (myb domain protein 111); DNA binding / transcription factor | chr5:19999147-20001293 REVERSEweakly similar to ( 132) MYBP_MAIZE Myb-related protein P - Zea mays (Maize)weakly similar to ( 125) loc_os01g65370 12001.m12650 protein transcription repressor MYB4, putative PGSC0003DMT400018840
CUST_7833_PI426222305	0.949785	1.34662	0.749253	4.73598	5.70426	2.06484	PGSC0003DMT400090291	Pentatricopeptide repeat-containing protein	chr04	Pentatricopeptide repeat-containing protein	PGSC0003DMP400061966	PGSC0003DMG400039862	PGSC0003DMC400061966	PGSC0003DMT400090291	27.3.25	RNA.regulation of transcription.MYB domain transcription factor family	pgsc0003dmp400061966	highly similar to ( 898) AT1G19720 | Symbols: | pentatricopeptide (PPR) repeat-containing protein | chr1:6819926-6822610 REVERSEweakly similar to ( 168) RF1_ORYSA Rf1 protein, mitochondrial precursor (PPR protein) (Fertility restorer) (Restorer for CMS) - Oryza sativa (Rice)highly similar to ( 621) loc_os03g59264 12003.m10825 protein calreticulin family protein, expressed PGSC0003DMT400090291
CUST_49703_PI426222305	0.889186	1.14268	0.750147	3.81648	2.76422	3.61053	PGSC0003DMT400034372	Transcription factor	chr10	Transcription factor	PGSC0003DMP400023376	PGSC0003DMG400013215	PGSC0003DMC400023376	PGSC0003DMT400034372	27.3.25	RNA.regulation of transcription.MYB domain transcription factor family	pgsc0003dmp400023376	moderately similar to ( 298) AT4G38620 | Symbols: ATMYB4, MYB4 | MYB4; DNA binding / transcription factor | chr4:18053866-18054876 FORWARDmoderately similar to ( 276) MYB1_HORVU Myb-related protein Hv1 - Hordeum vulgare (Barley)moderately similar to ( 285) loc_os09g36730 12009.m06622 protein myb-related protein Hv1, putative, expressed PGSC0003DMT400034372
CUST_6622_PI426222305	0.876631	1.21145	0.579383	3.52506	4.28621	2.7603	PGSC0003DMT400014362	Conserved gene of unknown function	chr03	Conserved gene of unknown function	PGSC0003DMP400009918	PGSC0003DMG400005633	PGSC0003DMC400009918	PGSC0003DMT400014362	27.3.7	RNA.regulation of transcription.C2C2(Zn) CO-like, Constans-like zinc finger family	pgsc0003dmp400009918	moderately similar to ( 265) AT1G68520 | Symbols: | zinc finger (B-box type) family protein | chr1:25709331-25710749 REVERSEmoderately similar to ( 228) loc_os06g15330 12006.m06246 protein zinc finger protein CONSTANS-LIKE 16, putative, expressed PGSC0003DMT400014362
CUST_17468_PI426222305	0.585909	1.02625	0.741869	8.49552	7.49745	2.45476	PGSC0003DMT400001587	PTAC15	chr03	PTAC15	PGSC0003DMP400001183	PGSC0003DMG400000587	PGSC0003DMC400001183	PGSC0003DMT400001587	27.3.99	RNA.regulation of transcription.unclassified	pgsc0003dmp400001183	moderately similar to ( 459) AT5G54180 | Symbols: PTAC15 | PTAC15 (PLASTID TRANSCRIPTIONALLY ACTIVE15) | chr5:21988544-21990183 FORWARDvery weakly similar to (84.0) loc_os02g39040 12002.m08992 protein mTERF-like protein, putative, expressedmTERF PGSC0003DMT400001587
CUST_8147_PI426222305	1.07538	1.37276	1.23064	1.87566	2.16627	2.00895	PGSC0003DMT400075345	Early flowering 3	chr12	Early flowering 3	PGSC0003DMP400051022	PGSC0003DMG400029303	PGSC0003DMC400051022	PGSC0003DMT400075345	27.3.47	RNA.regulation of transcription.ELF3	pgsc0003dmp400051022	moderately similar to ( 229) AT2G25930 | Symbols: ELF3, PYK20 | ELF3 (EARLY FLOWERING 3); protein C-terminus binding / transcription factor | chr2:11059459-11063178 FORWARDweakly similar to ( 134) loc_os06g05060 12006.m05235 protein early flowering 3, putative, expressed PGSC0003DMT400075345
CUST_2509_PI426222305	8.35112	11.266	5.40185	3.18327	1.10681	8.14368	PGSC0003DMT400028712	MYB transcription factor	chr10	MYB transcription factor	PGSC0003DMP400019519	PGSC0003DMG400011048	PGSC0003DMC400019519	PGSC0003DMT400028712	27.3.26	RNA.regulation of transcription.MYB-related transcription factor family	pgsc0003dmp400019519	weakly similar to ( 103) AT3G09600 | Symbols: | myb family transcription factor | chr3:2946459-2948200 FORWARDvery weakly similar to (97.1) loc_os02g45670 12002.m100315 protein DNA binding protein, putative, expressed PGSC0003DMT400028712
CUST_24300_PI426222305	3.38165	3.47378	2.16699	2.60719	1.52251	4.45337	PGSC0003DMT400035751	COL domain class transcription factor	chr12	COL domain class transcription factor	PGSC0003DMP400024311	PGSC0003DMG400013753	PGSC0003DMC400024311	PGSC0003DMT400035751	27.3.7	RNA.regulation of transcription.C2C2(Zn) CO-like, Constans-like zinc finger family	pgsc0003dmp400024311	weakly similar to ( 111) AT4G27310 | Symbols: | zinc finger (B-box type) family protein | chr4:13675853-13676616 FORWARDvery weakly similar to (95.9) loc_os08g08120 12008.m26597 protein transcription factor/ zinc ion binding protein, putative, expressed PGSC0003DMT400035751
CUST_1619_PI426222305	1.56648	2.43575	2.07698	4.97557	1.98727	2.81497	PGSC0003DMT400040444	Bromodomain-containing protein	chr06	Bromodomain-containing protein	PGSC0003DMP400027438	PGSC0003DMG400015657	PGSC0003DMC400027438	PGSC0003DMT400040444	27.3.42	RNA.regulation of transcription.Bromodomain proteins	pgsc0003dmp400027438	moderately similar to ( 330) AT1G20670 | Symbols: | DNA-binding bromodomain-containing protein | chr1:7164537-7167933 REVERSEmoderately similar to ( 233) loc_os09g37760 12009.m06723 protein DNA binding protein, putative, expressedBROMO Bromodomain PGSC0003DMT400040444
CUST_5560_PI426222305	1.35859	2.95951	2.81514	3.55746	1.09515	5.85877	PGSC0003DMT400006919	Heat stress transcription factor A3	chr09	Heat stress transcription factor A3	PGSC0003DMP400004803	PGSC0003DMG401002683	PGSC0003DMC400004803	PGSC0003DMT400006919	27.3.23	RNA.regulation of transcription.HSF,Heat-shock transcription factor family	pgsc0003dmp400004803	weakly similar to ( 131) AT5G03720 | Symbols: AT-HSFA3, HSFA3 | AT-HSFA3; DNA binding / transcription factor | chr5:971913-973683 REVERSEweakly similar to ( 132) loc_os02g32590 12002.m33703 protein heat shock factor protein 2, putative, expressed PGSC0003DMT400006919
CUST_9339_PI426222305	1.10495	2.33989	2.28994	4.16482	1.46516	3.87903	PGSC0003DMT400006369	Transcription factor	chr03	Transcription factor	PGSC0003DMP400004400	PGSC0003DMG400002489	PGSC0003DMC400004400	PGSC0003DMT400006369	27.3.26	RNA.regulation of transcription.MYB-related transcription factor family	pgsc0003dmp400004400	weakly similar to ( 157) AT1G17520 | Symbols: | DNA-binding protein, putative | chr1:6024959-6027224 REVERSEweakly similar to ( 135) loc_os01g51154 12001.m43494 protein single myb histone 4, putative, expressed PGSC0003DMT400006369	GO:0005634;GO:0000786	GO:0003700;GO:0003677;GO:0003682
CUST_15949_PI426222305	1.67471	3.39392	2.31843	3.21926	0.969115	5.32099	PGSC0003DMT400076398	Squamosa promoter binding	chr08	Squamosa promoter binding	PGSC0003DMP400051751	PGSC0003DMG401029709	PGSC0003DMC400051751	PGSC0003DMT400076398	27.3.28	RNA.regulation of transcription.SBP,Squamosa promoter binding protein family	pgsc0003dmp400051751	PGSC0003DMT400076398
CUST_44255_PI426222305	1.33343	3.68414	2.55186	3.43066	0.98864	3.35445	PGSC0003DMT400006011	GATA transcription factor	chr01	GATA transcription factor	PGSC0003DMP400004168	PGSC0003DMG400002337	PGSC0003DMC400004168	PGSC0003DMT400006011	27.3.9	RNA.regulation of transcription.C2C2(Zn) GATA transcription factor family	pgsc0003dmp400004168	PGSC0003DMT400006011		GO:0003700;GO:0008270;GO:0043565
CUST_52172_PI426222305	2.38598	1.33818	2.26654	2.07676	0.866693	2.11747	PGSC0003DMT400059885	AP2/ERF domain-containing transcription factor		AP2/ERF domain-containing transcription factor	PGSC0003DMP400040280	PGSC0003DMG400023295	PGSC0003DMC400040280	PGSC0003DMT400059885	27.3.3	RNA.regulation of transcription.AP2/EREBP, APETALA2/Ethylene-responsive element binding protein family	pgsc0003dmp400040280	very weakly similar to (85.5) AT1G74930 | Symbols: ORA47 | ORA47; DNA binding / transcription factor | chr1:28144239-28144826 FORWARDAP2 AP2 PGSC0003DMT400059885
CUST_27480_PI426222305	1.51763	1.36444	2.53282	3.03394	1.13225	3.41207	PGSC0003DMT400070866	Conserved gene of unknown function	chr04	Conserved gene of unknown function	PGSC0003DMP400047920	PGSC0003DMG401027557	PGSC0003DMC400047920	PGSC0003DMT400070866	27.3.99	RNA.regulation of transcription.unclassified	pgsc0003dmp400047920	weakly similar to ( 147) AT1G21150 | Symbols: | mitochondrial transcription termination factor family protein / mTERF family protein | chr1:7406406-7407578 REVERSEweakly similar to ( 151) loc_os02g51450 12002.m33454 protein mTERF family protein, expressedmTERF PGSC0003DMT400070866
CUST_13314_PI426222305	1.41096	1.24354	2.22563	4.99136	1.90768	3.54048	PGSC0003DMT400093994	Zinc finger (CCCH-type) family protein	chr12	Zinc finger (CCCH-type) family protein	PGSC0003DMP400065669	PGSC0003DMG400043565	PGSC0003DMC400065669	PGSC0003DMT400093994	27.3.12	RNA.regulation of transcription.C3H zinc finger family	pgsc0003dmp400065669	weakly similar to ( 149) AT3G19360 | Symbols: | zinc finger (CCCH-type) family protein | chr3:6707544-6708864 FORWARDweakly similar to ( 108) loc_os08g06330 12008.m04772 protein zinc finger C-x8-C-x5-C-x3-H type family protein, expressed PGSC0003DMT400093994
CUST_42650_PI426222305	1.24514	1.95888	2.09377	2.17271	1.57343	2.40796	PGSC0003DMT400052414	Pentatricopeptide repeat-containing protein	chr09	Pentatricopeptide repeat-containing protein	PGSC0003DMP400035340	PGSC0003DMG400020346	PGSC0003DMC400035340	PGSC0003DMT400052414	27.3	RNA.regulation of transcription	pgsc0003dmp400035340	highly similar to ( 755) AT3G09060 | Symbols: | pentatricopeptide (PPR) repeat-containing protein | chr3:2766367-2768430 REVERSEmoderately similar to ( 262) RF1_ORYSA Rf1 protein, mitochondrial precursor (PPR protein) (Fertility restorer) (Restorer for CMS) - Oryza sativa (Rice)highly similar to ( 557) loc_os01g63400 12001.m42758 protein rf1 protein, mitochondrial precursor, putative, expressed P…
CUST_5763_PI426222305	1.20971	1.31246	2.26477	2.72881	1.61134	2.24138	PGSC0003DMT400007031	Zinc finger (C2H2-type) family protein	chr09	Conserved gene of unknown function	PGSC0003DMP400004877	PGSC0003DMG400002717	PGSC0003DMC400004877	PGSC0003DMT400007031	27.3.99	RNA.regulation of transcription.unclassified	pgsc0003dmp400004877	moderately similar to ( 284) AT2G36480 | Symbols: | zinc finger (C2H2-type) family protein | chr2:15302567-15306274 REVERSEweakly similar to ( 118) loc_os09g39270 12009.m06866 protein expressed protein PGSC0003DMT400007031
CUST_43056_PI426222305	1.07148	1.77853	2.10707	4.02527	1.6123	3.89716	PGSC0003DMT400045735	Transcription factor	chr02	Transcription factor	PGSC0003DMP400030992	PGSC0003DMG400017734	PGSC0003DMC400030992	PGSC0003DMT400045735	27.3.65	RNA.regulation of transcription.Polycomb Group (PcG)	pgsc0003dmp400030992	weakly similar to ( 141) AT1G16690 | Symbols: | transcription factor-related | chr1:5706458-5709371 FORWARDweakly similar to ( 121) loc_os09g11270 12009.m04390 protein enhancer of polycomb-like protein, putative, expressed PGSC0003DMT400045735
CUST_41711_PI426222305	0.787484	1.80529	4.84318	2.35145	1.53552	2.78518	PGSC0003DMT400048585	Aspartic proteinase nepenthesin-1	chr10	Aspartic proteinase nepenthesin-1	PGSC0003DMP400032897	PGSC0003DMG400018877	PGSC0003DMC400032897	PGSC0003DMT400048585	27.3.99	RNA.regulation of transcription.unclassified	pgsc0003dmp400032897	highly similar to ( 525) AT1G01300 | Symbols: | aspartyl protease family protein | chr1:117065-118522 FORWARDmoderately similar to ( 396) loc_os01g41550 12001.m10423 protein aspartic proteinase nepenthesin-2 precursor, putative, expressedAsp PGSC0003DMT400048585
CUST_42780_PI426222305	1.08492	1.18026	2.05616	2.16608	0.933182	2.15003	PGSC0003DMT400002153	TCP transcription factor	chr05	TCP transcription factor	PGSC0003DMP400001569	PGSC0003DMG400000823	PGSC0003DMC400001569	PGSC0003DMT400002153	27.3.29	RNA.regulation of transcription.TCP transcription factor family	pgsc0003dmp400001569	weakly similar to ( 109) AT1G68800 | Symbols: BRC2, TCP12 | TCP12 (TCP DOMAIN PROTEIN 12); transcription factor | chr1:25847306-25848471 REVERSEvery weakly similar to (92.8) loc_os09g24480 12009.m05602 protein teosinte-branched one, putativeTCP PGSC0003DMT400002153
CUST_47643_PI426222305	1.02442	1.1268	2.82119	2.38884	0.931836	2.23981	PGSC0003DMT400005209	BHLH transcription factor	chr12	BHLH transcription factor	PGSC0003DMP400003676	PGSC0003DMG400002056	PGSC0003DMC400003676	PGSC0003DMT400005209	27.3.6	RNA.regulation of transcription.bHLH,Basic Helix-Loop-Helix family	pgsc0003dmp400003676	weakly similar to ( 104) AT5G65640 | Symbols: bHLH093 | bHLH093 (beta HLH protein 93); DNA binding / transcription factor | chr5:26237137-26238635 FORWARDweakly similar to ( 104) loc_os03g04310 12003.m101180 protein DNA binding protein, putative, expressed PGSC0003DMT400005209		GO:0046983
CUST_7710_PI426222305	0.904975	1.19167	2.07518	3.72764	0.814107	3.02352	PGSC0003DMT400009680	E2F4,5	chr04	E2F4,5	PGSC0003DMP400006747	PGSC0003DMG400003778	PGSC0003DMC400006747	PGSC0003DMT400009680	27.3.18	RNA.regulation of transcription.E2F/DP transcription factor family	pgsc0003dmp400006747	weakly similar to ( 144) AT1G47870 | Symbols: E2FC, ATE2F2, ATE2FC | ATE2F2; DNA binding / protein heterodimerization/ transcription factor | chr1:17634937-17637557 FORWARDweakly similar to ( 144) loc_os02g33430 12002.m100042 protein transcription factor E2F3, putative, expressed PGSC0003DMT400009680
CUST_34948_PI426222305	2.03042	2.44259	1.46176	7.31739	1.92227	5.51383	PGSC0003DMT400073052	Zinc ion binding protein	chr02	Zinc ion binding protein	PGSC0003DMP400049431	PGSC0003DMG400028413	PGSC0003DMC400049431	PGSC0003DMT400073052	27.3.99	RNA.regulation of transcription.unclassified	pgsc0003dmp400049431	moderately similar to ( 411) AT1G29800 | Symbols: | phosphoinositide binding / zinc ion binding | chr1:10432736-10435046 FORWARDmoderately similar to ( 337) loc_os02g13890 12002.m100153 protein zinc ion binding protein, putative, expressed PGSC0003DMT400073052
CUST_24113_PI426222305	2.65107	4.2284	0.987058	3.36824	1.82009	5.41378	PGSC0003DMT400002881	Zinc knuckle (CCHC-type) family protein	chr09	Zinc knuckle (CCHC-type) family protein	PGSC0003DMP400002087	PGSC0003DMG400001126	PGSC0003DMC400002087	PGSC0003DMT400002881	27.3.12	RNA.regulation of transcription.C3H zinc finger family	pgsc0003dmp400002087	moderately similar to ( 223) AT5G43630 | Symbols: TZP | TZP; DNA binding / nucleic acid binding / zinc ion binding | chr5:17527261-17530207 FORWARD PGSC0003DMT400002881
CUST_19162_PI426222305	1.05874	2.24468	1.75382	3.36002	0.492277	3.55134	PGSC0003DMT400019465	Ocs element-binding factor	chr05	Ocs element-binding factor	PGSC0003DMP400013327	PGSC0003DMG400007523	PGSC0003DMC400013327	PGSC0003DMT400019465	27.3.35	RNA.regulation of transcription.bZIP transcription factor family	pgsc0003dmp400013327	weakly similar to ( 125) AT3G30530 | Symbols: ATBZIP42 | ATBZIP42 (ARABIDOPSIS THALIANA BASIC LEUCINE-ZIPPER 42); DNA binding / protein heterodimerization/ protein homodimerization/ transcription factor | chr3:12139512-12140033 FORWARDvery weakly similar to (87.4) loc_os02g49560 12002.m09990 protein G-box-binding factor 1, putative, expressed PGSC0003DMT400019465
CUST_6687_PI426222305	1.96664	2.2885	1.31333	2.2331	1.74598	2.33205	PGSC0003DMT400014350	DNA binding protein	chr03	DNA binding protein	PGSC0003DMP400009906	PGSC0003DMG400005626	PGSC0003DMC400009906	PGSC0003DMT400014350	27.3.26	RNA.regulation of transcription.MYB-related transcription factor family	pgsc0003dmp400009906	moderately similar to ( 216) AT1G49010 | Symbols: | myb family transcription factor | chr1:18132714-18133778 FORWARDweakly similar to ( 194) loc_os04g58020 12004.m10684 protein DNA binding protein, putative, expressed PGSC0003DMT400014350
CUST_19311_PI426222305	1.9626	3.69715	1.47726	4.05024	1.5285	9.17014	PGSC0003DMT400050586	DNA binding protein	chr05	Transcription factor bHLH49	PGSC0003DMP400034159	PGSC0003DMG400019659	PGSC0003DMC400034159	PGSC0003DMT400050586	27.3.6	RNA.regulation of transcription.bHLH,Basic Helix-Loop-Helix family	pgsc0003dmp400034159	moderately similar to ( 280) AT1G68920 | Symbols: | basic helix-loop-helix (bHLH) family protein | chr1:25915620-25917675 FORWARDmoderately similar to ( 232) loc_os06g16400 12006.m32045 protein BHLH transcription factor, putative, expressed PGSC0003DMT400050586
CUST_35182_PI426222305	1.94838	2.39541	1.8042	3.79297	1.75427	3.39806	PGSC0003DMT400021474	Mediator complex subunit SOH1	chr03	Mediator complex subunit SOH1	PGSC0003DMP400014608	PGSC0003DMG403008332	PGSC0003DMC400014608	PGSC0003DMT400021474	27.3.99	RNA.regulation of transcription.unclassified	pgsc0003dmp400014608	moderately similar to ( 216) AT5G19910 | Symbols: | SOH1 family protein | chr5:6731484-6732821 REVERSEmoderately similar to ( 206) loc_os07g07020 12007.m05162 protein mediator complex subunit SOH1, putative, expressedSOH1 SOH1 PGSC0003DMT400021474	GO:0016592	GO:0003674
CUST_10503_PI426222305	1.88012	2.86274	1.81567	4.49319	1.19528	6.08574	PGSC0003DMT400031843	DNA binding protein	chr08	DNA binding protein	PGSC0003DMP400021603	PGSC0003DMG400012215	PGSC0003DMC400021603	PGSC0003DMT400031843	27.3.67	RNA.regulation of transcription.putative transcription regulator	pgsc0003dmp400021603	weakly similar to ( 152) AT1G63470 | Symbols: | DNA-binding family protein | chr1:23536831-23538863 REVERSEweakly similar to ( 147) loc_os02g57820 12002.m10803 protein DNA binding protein, putative, expressedDUF296 PGSC0003DMT400031843		GO:0003677
CUST_24886_PI426222305	1.8298	2.69816	1.43132	3.35046	1.0889	3.25131	PGSC0003DMT400045140	LSD1-type zinc finger protein	chr08	LOL1 (LSD ONE LIKE 1)	PGSC0003DMP400030576	PGSC0003DMG400017509	PGSC0003DMC400030576	PGSC0003DMT400045140	27.3.99	RNA.regulation of transcription.unclassified	pgsc0003dmp400030576	weakly similar to ( 108) AT1G32540 | Symbols: LOL1 | LOL1 (LSD ONE LIKE 1); DNA binding | chr1:11768043-11769591 FORWARDweakly similar to ( 105) loc_os08g06280 12008.m26469 protein LOL1, putative, expressed PGSC0003DMT400045140
CUST_20509_PI426222305	1.76135	2.76544	1.1193	2.20585	1.3752	2.04027	PGSC0003DMT400021319	Ternary complex factor MIP1	chr10	Ternary complex factor MIP1	PGSC0003DMP400014502	PGSC0003DMG400008268	PGSC0003DMC400014502	PGSC0003DMT400021319	27.3.27	RNA.regulation of transcription.NAC domain transcription factor family	pgsc0003dmp400014502	moderately similar to ( 227) AT5G66600 | Symbols: | unknown protein | chr5:26575105-26578315 REVERSEweakly similar to ( 190) loc_os03g55890 12003.m10501 protein ternary complex factor MIP1, putative, expressedDUF547 PGSC0003DMT400021319
CUST_2809_PI426222305	1.72231	4.04689	1.76025	5.61187	1.80118	5.40435	PGSC0003DMT400071376	Cutin deficient 2	chr01	Cutin deficient 2	PGSC0003DMP400048281	PGSC0003DMG400027770	PGSC0003DMC400048281	PGSC0003DMT400071376	27.3.22	RNA.regulation of transcription.HB,Homeobox transcription factor family	pgsc0003dmp400048281	highly similar to ( 905) AT4G00730 | Symbols: ANL2, AHDP | ANL2 (ANTHOCYANINLESS 2); transcription factor/ transcription regulator | chr4:301071-304103 REVERSEhighly similar to ( 804) loc_os02g45250 12002.m09564 protein homeobox protein FWA, putative, expressedSTART START START Homeobox PGSC0003DMT400071376
CUST_52090_PI426222305	1.69172	2.09111	1.58675	2.44263	1.25148	3.43291	PGSC0003DMT400022703	DNA binding protein		DNA binding protein	PGSC0003DMP400015469	PGSC0003DMG400008805	PGSC0003DMC400015469	PGSC0003DMT400022703	27.3.6	RNA.regulation of transcription.bHLH,Basic Helix-Loop-Helix family	pgsc0003dmp400015469	weakly similar to ( 172) AT1G68920 | Symbols: | basic helix-loop-helix (bHLH) family protein | chr1:25915620-25917675 FORWARDweakly similar to ( 107) loc_os06g16400 12006.m32045 protein BHLH transcription factor, putative, expressed PGSC0003DMT400022703
CUST_44870_PI426222305	1.63898	2.1079	1.71605	2.09091	1.27523	2.31902	PGSC0003DMT400002796	Cell differentiation protein rcd1	chr07	Cell differentiation protein rcd1	PGSC0003DMP400002022	PGSC0003DMG400001086	PGSC0003DMC400002022	PGSC0003DMT400002796	27.3.99	RNA.regulation of transcription.unclassified	pgsc0003dmp400002022	weakly similar to ( 133) AT3G20800 | Symbols: | rcd1-like cell differentiation protein, putative | chr3:7271412-7273897 REVERSEweakly similar to ( 140) loc_os03g57130 12003.m10633 protein cell differentiation protein rcd1, putative, expressedRcd1 RCD1 PGSC0003DMT400002796
CUST_49163_PI426222305	1.60135	3.05675	1.53974	6.0536	1.37156	3.70543	PGSC0003DMT400054167	Histone-lysine n-methyltransferase, suvh	chr03	Histone-lysine n-methyltransferase, suvh	PGSC0003DMP400036459	PGSC0003DMG400021006	PGSC0003DMC400036459	PGSC0003DMT400054167	27.3.69	RNA.regulation of transcription.SET-domain transcriptional regulator family	pgsc0003dmp400036459	moderately similar to ( 429) AT2G22740 | Symbols: SUVH6, SDG23 | SUVH6; methyl-CpG binding / methyl-CpNpG binding / methyl-CpNpN binding / methyltransferase | chr2:9664256-9666628 REVERSEmoderately similar to ( 418) loc_os08g30910 12008.m07091 protein YDG/SRA domain containing protein, expressedSRA YDG_SRA SET SET Pre-SET PreSET PGSC0003DMT400054167
CUST_5648_PI426222305	1.50845	3.93775	1.48697	4.88828	1.17233	4.72601	PGSC0003DMT400006851	DNA binding protein	chr09	DNA binding protein	PGSC0003DMP400004764	PGSC0003DMG400002660	PGSC0003DMC400004764	PGSC0003DMT400006851	27.3.35	RNA.regulation of transcription.bZIP transcription factor family	pgsc0003dmp400004764	moderately similar to ( 290) AT2G36270 | Symbols: ABI5, GIA1 | ABI5 (ABA INSENSITIVE 5); DNA binding / transcription activator/ transcription factor | chr2:15204980-15206571 REVERSEweakly similar to ( 170) loc_os01g64000 12001.m150782 protein ABA response element binding factor, putative, expressed PGSC0003DMT400006851
CUST_49151_PI426222305	1.49184	2.55555	1.33746	4.22758	1.82692	6.32511	PGSC0003DMT400054154	SET domain protein	chr03	SET domain protein	PGSC0003DMP400036457	PGSC0003DMG400021004	PGSC0003DMC400036457	PGSC0003DMT400054154	27.3.69	RNA.regulation of transcription.SET-domain transcriptional regulator family	pgsc0003dmp400036457	moderately similar to ( 428) AT2G22740 | Symbols: SUVH6, SDG23 | SUVH6; methyl-CpG binding / methyl-CpNpG binding / methyl-CpNpN binding / methyltransferase | chr2:9664256-9666628 REVERSEmoderately similar to ( 412) loc_os08g30910 12008.m07091 protein YDG/SRA domain containing protein, expressedSRA YDG_SRA SET SET Pre-SET PreSET PGSC0003DMT400054154
CUST_8471_PI426222305	1.49156	2.20254	1.71535	4.38367	1.04613	2.33696	PGSC0003DMT400058414	Ccaat-binding transcription factor subunit A	chr01	Ccaat-binding transcription factor subunit A	PGSC0003DMP400039325	PGSC0003DMG400022680	PGSC0003DMC400039325	PGSC0003DMT400058414	27.3.15	RNA.regulation of transcription.CCAAT box binding factor family, HAP3	pgsc0003dmp400039325	weakly similar to ( 168) AT2G47810 | Symbols: NF-YB5 | NF-YB5 (NUCLEAR FACTOR Y, SUBUNIT B5); transcription factor | chr2:19582938-19583420 REVERSEweakly similar to ( 143) NFYB3_ORYSA Nuclear transcription factor Y subunit B-3 (OsNF-YB-3) (Transcriptional activator HAP3B) - Oryza sativa (Rice)weakly similar to ( 163) loc_os01g70890 12001.m13134 protein nuclear transcription factor Y subunit B-5, …
CUST_45376_PI426222305	1.42968	2.11634	1.16994	2.22475	1.75363	2.22798	PGSC0003DMT400001613	Transcription factor	chr03	Transcription factor	PGSC0003DMP400001202	PGSC0003DMG400000597	PGSC0003DMC400001202	PGSC0003DMT400001613	27.3.29	RNA.regulation of transcription.TCP transcription factor family	pgsc0003dmp400001202	weakly similar to ( 143) AT3G47620 | Symbols: AtTCP14 | AtTCP14 (TEOSINTE BRANCHED1, CYCLOIDEA and PCF (TCP) 14); transcription factor | chr3:17559004-17560473 FORWARDweakly similar to ( 146) loc_os02g51280 12002.m10162 protein TCP-domain protein, putative, expressedTCP PGSC0003DMT400001613
CUST_8776_PI426222305	1.41601	2.78354	1.29082	3.08649	1.10403	3.33255	PGSC0003DMT400033855	Mob1	chr07	Mob1	PGSC0003DMP400023050	PGSC0003DMG400013009	PGSC0003DMC400023050	PGSC0003DMT400033855	27.3.99	RNA.regulation of transcription.unclassified	pgsc0003dmp400023050	moderately similar to ( 395) AT5G45550 | Symbols: | mob1/phocein family protein | chr5:18462284-18464840 FORWARDmoderately similar to ( 402) loc_os10g25674 12010.m21996 protein mps one binder kinase activator-like 1A, putative, expressedMob1_phocein PGSC0003DMT400033855
CUST_33239_PI426222305	1.40998	2.59173	1.43106	2.58312	1.69106	2.73059	PGSC0003DMT400017840	Homeobox domain, ZF-HD class; ZF-HD homeobox protein Cys/His-rich dimerisation region; Homeodomain	chr02	Homeobox domain, ZF-HD class; ZF-HD homeobox protein Cys/His-rich dimerisation region; Homeodomain	PGSC0003DMP400012267	PGSC0003DMG400006928	PGSC0003DMC400012267	PGSC0003DMT400017840	27.3.80	RNA.regulation of transcription.zf-HD	pgsc0003dmp400012267	weakly similar to ( 181) AT5G15210 | Symbols: ATHB30, ZFHD3 | ATHB30 (ARABIDOPSIS THALIANA HOMEOBOX PROTEIN 30); DNA binding / transcription factor | chr5:4937874-4938689 REVERSEweakly similar to ( 126) loc_os05g50310 12005.m09100 protein ZF-HD homeobox protein, putative, expressedZF-HD_dimer PGSC0003DMT400017840		GO:0003677
CUST_8720_PI426222305	1.38997	2.45474	1.03773	4.10731	1.11266	3.46726	PGSC0003DMT400050347	Chromatin remodeling complex subunit	chr07	Chromatin remodeling complex subunit	PGSC0003DMP400033983	PGSC0003DMG400019569	PGSC0003DMC400033983	PGSC0003DMT400050347	27.3.44	RNA.regulation of transcription.Chromatin Remodeling Factors	pgsc0003dmp400033983	weakly similar to ( 113) AT1G05120 | Symbols: | SNF2 domain-containing protein / helicase domain-containing protein / RING finger domain-containing protein | chr1:1471624-1476067 REVERSEvery weakly similar to ( 100) loc_os07g32730 12007.m07536 protein DNA repair protein rhp16, putative, expressed PGSC0003DMT400050347
CUST_49168_PI426222305	1.3887	2.8642	1.55563	3.6772	1.58155	3.80216	PGSC0003DMT400080398	SET domain protein	chr03	SET domain protein	PGSC0003DMP400054540	PGSC0003DMG400031306	PGSC0003DMC400054540	PGSC0003DMT400080398	27.3.69	RNA.regulation of transcription.SET-domain transcriptional regulator family	pgsc0003dmp400054540	moderately similar to ( 440) AT2G22740 | Symbols: SUVH6, SDG23 | SUVH6; methyl-CpG binding / methyl-CpNpG binding / methyl-CpNpN binding / methyltransferase | chr2:9664256-9666628 REVERSEmoderately similar to ( 409) loc_os08g30910 12008.m07091 protein YDG/SRA domain containing protein, expressedSRA YDG_SRA SET SET Pre-SET PreSET PGSC0003DMT400080398
CUST_9208_PI426222305	1.33797	2.02633	1.39444	3.49051	1.4308	4.58389	PGSC0003DMT400006680	Developmental protein	chr03	Developmental protein	PGSC0003DMP400004638	PGSC0003DMG400002596	PGSC0003DMC400004638	PGSC0003DMT400006680	27.3.71	RNA.regulation of transcription.SNF7	pgsc0003dmp400004638	moderately similar to ( 275) AT1G17730 | Symbols: VPS46.1 | VPS46.1 (VACUOLAR PROTEIN SORTING 46.1) | chr1:6099210-6100153 FORWARDmoderately similar to ( 241) loc_os06g43590 12006.m091745 protein charged multivesicular body protein 1b, putative, expressed PGSC0003DMT400006680
CUST_12006_PI426222305	1.31709	3.37632	1.28631	3.51193	1.103	3.62955	PGSC0003DMT400096078	Type I MADS box transcription factor	chr12	Type I MADS box transcription factor	PGSC0003DMP400067753	PGSC0003DMG400045649	PGSC0003DMC400067753	PGSC0003DMT400096078	27.3.24	RNA.regulation of transcription.MADS box transcription factor family	pgsc0003dmp400067753	very weakly similar to (84.3) loc_os01g18440 12001.m08384 protein MADS-box transcription factor PHERES2, putative PGSC0003DMT400096078
CUST_9316_PI426222305	1.30991	2.73297	1.57544	4.41143	1.0616	3.13486	PGSC0003DMT400006365	PHD1	chr03	PHD1	PGSC0003DMP400004396	PGSC0003DMG400002485	PGSC0003DMC400004396	PGSC0003DMT400006365	27.3.2	RNA.regulation of transcription.Alfin-like	pgsc0003dmp400004396	moderately similar to ( 271) AT5G20510 | Symbols: AL5 | AL5 (ALFIN-LIKE 5); DNA binding / methylated histone residue binding | chr5:6939991-6942846 REVERSEmoderately similar to ( 266) loc_os04g36730 12004.m08713 protein PHD finger protein, putative, expressed PGSC0003DMT400006365	GO:0005634	GO:0008270;GO:0042393
CUST_20547_PI426222305	1.30955	2.43986	1.07048	4.39937	1.03233	5.12278	PGSC0003DMT400021320	Ternary complex factor MIP1	chr10	Ternary complex factor MIP1	PGSC0003DMP400014503	PGSC0003DMG400008268	PGSC0003DMC400014503	PGSC0003DMT400021320	27.3.27	RNA.regulation of transcription.NAC domain transcription factor family	pgsc0003dmp400014503	moderately similar to ( 353) AT5G66600 | Symbols: | unknown protein | chr5:26575105-26578315 REVERSEmoderately similar to ( 343) loc_os03g55890 12003.m10501 protein ternary complex factor MIP1, putative, expressedDUF547 PGSC0003DMT400021320
CUST_2794_PI426222305	1.30034	2.10588	1.34511	2.84074	1.14736	4.71337	PGSC0003DMT400033248	ESC	chr01	ESC	PGSC0003DMP400022621	PGSC0003DMG400012769	PGSC0003DMC400022621	PGSC0003DMT400033248	27.3.67	RNA.regulation of transcription.putative transcription regulator	pgsc0003dmp400022621	weakly similar to ( 187) AT2G45430 | Symbols: | DNA-binding protein-related | chr2:18727848-18728801 FORWARDweakly similar to ( 192) loc_os02g25020 12002.m07649 protein DNA binding protein, putative, expressedDUF296 PGSC0003DMT400033248	GO:0005634	GO:0003680
CUST_25979_PI426222305	1.28984	2.14411	1.61088	2.97194	1.11367	2.79472	PGSC0003DMT400051920	SET domain protein	chr06	SET domain protein	PGSC0003DMP400034970	PGSC0003DMG400020151	PGSC0003DMC400034970	PGSC0003DMT400051920	27.3.69	RNA.regulation of transcription.SET-domain transcriptional regulator family	pgsc0003dmp400034970	moderately similar to ( 416) AT3G04380 | Symbols: SUVR4, SDG31 | SUVR4; histone-lysine N-methyltransferase | chr3:1161602-1164539 FORWARDmoderately similar to ( 459) loc_os02g40770 12002.m100281 protein pre-SET motif family protein, expressedSET SET PGSC0003DMT400051920
CUST_5803_PI426222305	1.28638	3.64059	1.96807	2.50349	1.45662	3.77825	PGSC0003DMT400023030	F-box family protein	chr09	F-box family protein	PGSC0003DMP400015687	PGSC0003DMG400008914	PGSC0003DMC400015687	PGSC0003DMT400023030	27.3.8	RNA.regulation of transcription.C2C2(Zn) DOF zinc finger family	pgsc0003dmp400015687	weakly similar to ( 143) AT5G02460 | Symbols: | Dof-type zinc finger domain-containing protein | chr5:539549-541058 REVERSEvery weakly similar to (96.7) PBF_MAIZE Dof zinc finger protein PBF (Prolamin box-binding factor) - Zea mays (Maize)weakly similar to ( 126) loc_os03g16850 12003.m07117 protein conserved hypothetical proteinzf-Dof PGSC0003DMT400023030
CUST_16301_PI426222305	1.27631	3.95616	1.20497	4.36073	1.30478	4.31014	PGSC0003DMT400060659	AP2 domain class transcription factor	chr04	AP2 domain class transcription factor	PGSC0003DMP400040827	PGSC0003DMG400023593	PGSC0003DMC400040827	PGSC0003DMT400060659	27.3.3	RNA.regulation of transcription.AP2/EREBP, APETALA2/Ethylene-responsive element binding protein family	pgsc0003dmp400040827	weakly similar to ( 105) AT5G64750 | Symbols: ABR1 | ABR1 (ABA REPRESSOR1); DNA binding / transcription factor | chr5:25891679-25893656 FORWARDvery weakly similar to (90.5) ERF1_ORYSA Ethylene-responsive transcription factor 1 (Ethylene-responsive element-binding factor 1) (EREBP-1) (OsEREBP1) - Oryza sativa (Rice)very weakly similar to ( 100) loc_os04g32620 12004.m08360 protein DNA binding prote…
CUST_24432_PI426222305	1.27096	2.64033	1.30355	4.38226	1.21658	4.2886	PGSC0003DMT400010977	Ccaat-binding transcription factor subunit A	chr12	Ccaat-binding transcription factor subunit A	PGSC0003DMP400007650	PGSC0003DMG400004299	PGSC0003DMC400007650	PGSC0003DMT400010977	27.3.15	RNA.regulation of transcription.CCAAT box binding factor family, HAP3	pgsc0003dmp400007650	moderately similar to ( 202) AT4G14540 | Symbols: NF-YB3 | NF-YB3 (NUCLEAR FACTOR Y, SUBUNIT B3); transcription factor | chr4:8344663-8345148 FORWARDweakly similar to ( 171) NFYB_MAIZE Nuclear transcription factor Y subunit B (NF-YB) (CAAT-box DNA-binding protein subunit B) - Zea mays (Maize)weakly similar to ( 197) loc_os07g41580 12007.m08394 protein nuclear transcription factor Y subunit B-3, p…
CUST_25680_PI426222305	1.2494	2.64204	1.58306	3.20012	1.42306	3.28902	PGSC0003DMT400029394	MYB transcription factor MYB114	chr10	MYB transcription factor MYB114	PGSC0003DMP400020008	PGSC0003DMG400011294	PGSC0003DMC400020008	PGSC0003DMT400029394	27.3.26	RNA.regulation of transcription.MYB-related transcription factor family	pgsc0003dmp400020008	weakly similar to ( 123) AT1G01060 | Symbols: LHY, LHY1 | LHY (LATE ELONGATED HYPOCOTYL); DNA binding / transcription factor | chr1:33992-37061 REVERSEweakly similar to ( 124) loc_os08g06110 12008.m080033 protein LHY protein, putative, expressed PGSC0003DMT400029394
CUST_30426_PI426222305	1.24014	3.15773	1.10127	3.08871	1.05943	3.19831	PGSC0003DMT400069831	Conserved gene of unknown function	chr05	Conserved gene of unknown function	PGSC0003DMP400047186	PGSC0003DMG400027152	PGSC0003DMC400047186	PGSC0003DMT400069831	27.3.99	RNA.regulation of transcription.unclassified	pgsc0003dmp400047186	weakly similar to ( 155) AT3G54826 | Symbols: | FUNCTIONS IN: molecular_function unknown; INVOLVED IN: biological_process unknown; LOCATED IN: cellular_component unknown; CONTAINS InterPro DOMAIN/s: Zinc finger, Zim17-type (InterPro:IPR007853); Has 284 Blast hits to 284 proteins in 134 species: Archae - 0; Bacteria - 0; Metazoa - 100; Fungi - 79; Plants - 58; Viruses - 0; Other Eukaryotes - 47 (s…
CUST_38330_PI426222305	1.23667	2.66581	1.65347	4.26348	1.19976	3.96492	PGSC0003DMT400045797	MADS-box protein 17	chr07	MADS-box protein 17	PGSC0003DMP400031036	PGSC0003DMG400017759	PGSC0003DMC400031036	PGSC0003DMT400045797	27.3.24	RNA.regulation of transcription.MADS box transcription factor family	pgsc0003dmp400031036	very weakly similar to (87.8) AT1G24260 | Symbols: SEP3, AGL9 | SEP3 (SEPALLATA3); DNA binding / protein binding / transcription factor | chr1:8593790-8595862 REVERSEvery weakly similar to (89.0) MAD21_ORYSA MADS-box transcription factor 21 (OsMADS21) (RMADS207) - Oryza sativa (Rice)very weakly similar to (89.0) loc_os01g66290 12001.m42780 protein MADS-box transcritpion factor 21, putative, expre…	GO:0005634	GO:0003700;GO:0003677;GO:0046983
CUST_18755_PI426222305	1.23264	2.84127	1.33434	7.6161	1.24892	4.31488	PGSC0003DMT400001194	SNF7 family protein	chr11	SNF7 family protein	PGSC0003DMP400000886	PGSC0003DMG400000449	PGSC0003DMC400000886	PGSC0003DMT400001194	27.3.71	RNA.regulation of transcription.SNF7	pgsc0003dmp400000886	moderately similar to ( 231) AT5G22950 | Symbols: VPS24.1 | VPS24.1 | chr5:7681380-7682720 FORWARDmoderately similar to ( 228) loc_os07g29630 12007.m07235 protein charged multivesicular body protein 3, putative, expressedSnf7 PGSC0003DMT400001194	GO:0000815
CUST_7966_PI426222305	1.22793	4.9962	1.16797	7.1361	1.08842	4.80305	PGSC0003DMT400097460	C3HL domain class transcription factor	chr05	C3HL domain class transcription factor	PGSC0003DMP400069135	PGSC0003DMG400047031	PGSC0003DMC400069135	PGSC0003DMT400097460	27.3.12	RNA.regulation of transcription.C3H zinc finger family	pgsc0003dmp400069135	weakly similar to ( 160) AT2G41900 | Symbols: | zinc finger (CCCH-type) family protein | chr2:17491352-17493502 FORWARDweakly similar to ( 166) loc_os03g49170 12003.m101454 protein nucleic acid binding protein, putative, expressed PGSC0003DMT400097460	GO:0044424	GO:0046872;GO:0003676
CUST_42435_PI426222305	1.22378	3.53871	1.14	4.58673	1.0776	4.3828	PGSC0003DMT400052801	GATA transcription factor	chr08	GATA transcription factor	PGSC0003DMP400035597	PGSC0003DMG400020491	PGSC0003DMC400035597	PGSC0003DMT400052801	27.3.9	RNA.regulation of transcription.C2C2(Zn) GATA transcription factor family	pgsc0003dmp400035597	moderately similar to ( 265) AT4G17570 | Symbols: | zinc finger (GATA type) family protein | chr4:9784329-9786974 REVERSEweakly similar to ( 105) loc_os04g46020 12004.m35399 protein GATA transcription factor 29, putative, expressed PGSC0003DMT400052801
CUST_7087_PI426222305	1.20289	2.87456	1.33092	6.19204	1.56951	3.80306	PGSC0003DMT400062098	TGB12K interacting protein 3	chr10	TGB12K interacting protein 3	PGSC0003DMP400041789	PGSC0003DMG400024167	PGSC0003DMC400041789	PGSC0003DMT400062098	27.3.39	RNA.regulation of transcription.AtSR Transcription Factor family	pgsc0003dmp400041789	moderately similar to ( 372) AT4G35450 | Symbols: AKR2, AFT, AKR2A | AKR2 (ANKYRIN REPEAT-CONTAINING PROTEIN 2); protein binding | chr4:16839862-16841759 FORWARDmoderately similar to ( 385) loc_os09g33810 12009.m060082 protein ankyrin repeat domain-containing protein 2, putative, expressedANK PGSC0003DMT400062098
CUST_42955_PI426222305	1.1521	2.89399	1.03565	5.38614	1.64284	4.64018	PGSC0003DMT400015694	RNA binding protein	chr07	RNA binding protein	PGSC0003DMP400010870	PGSC0003DMG400006131	PGSC0003DMC400010870	PGSC0003DMT400015694	27.3.99	RNA.regulation of transcription.unclassified	pgsc0003dmp400010870	moderately similar to ( 459) AT2G05160 | Symbols: | zinc finger (CCCH-type) family protein / RNA recognition motif (RRM)-containing protein | chr2:1859011-1860931 REVERSEmoderately similar to ( 311) loc_os08g03310 12008.m080069 protein RNA binding protein, putative, expressed PGSC0003DMT400015694
CUST_12931_PI426222305	1.14429	3.15767	1.12242	4.8334	1.37164	4.29803	PGSC0003DMT400063117	DNA binding protein	chr03	DNA binding protein	PGSC0003DMP400042485	PGSC0003DMG400024554	PGSC0003DMC400042485	PGSC0003DMT400063117	27.3.6	RNA.regulation of transcription.bHLH,Basic Helix-Loop-Helix family	pgsc0003dmp400042485	weakly similar to ( 102) AT4G00050 | Symbols: UNE10 | UNE10 (unfertilized embryo sac 10); DNA binding / transcription factor | chr4:17863-19848 FORWARDvery weakly similar to (91.3) loc_os01g18290 12001.m42972 protein basic helix-loop-helix dimerisation region bHLH, putative, expressed PGSC0003DMT400063117
CUST_29800_PI426222305	1.14087	3.52066	1.84582	3.95791	1.51105	3.78258	PGSC0003DMT400053830	SET domain protein	chr01	SET domain protein	PGSC0003DMP400036278	PGSC0003DMG400020880	PGSC0003DMC400036278	PGSC0003DMT400053830	27.3.69	RNA.regulation of transcription.SET-domain transcriptional regulator family	pgsc0003dmp400036278	very weakly similar to (89.0) AT5G53430 | Symbols: SDG29, SET29, ATX5 | SDG29 (SET DOMAIN GROUP 29); DNA binding / protein binding / zinc ion binding | chr5:21677623-21683166 FORWARD PGSC0003DMT400053830	GO:0005634	GO:0008270;GO:0008168
CUST_33524_PI426222305	1.13825	2.09517	1.06845	3.51677	1.1217	3.96968	PGSC0003DMT400058238	Zinc ion binding	chr05	Zinc ion binding	PGSC0003DMP400039191	PGSC0003DMG401022613	PGSC0003DMC400039191	PGSC0003DMT400058238	27.3.99	RNA.regulation of transcription.unclassified	pgsc0003dmp400039191	moderately similar to ( 209) AT1G70150 | Symbols: | zinc ion binding | chr1:26416898-26419521 FORWARDweakly similar to ( 164) loc_os07g29770 12007.m079679 protein MYND finger family protein, expressed PGSC0003DMT400058238
CUST_39924_PI426222305	1.13395	2.03598	1.5573	3.79868	1.52955	3.58746	PGSC0003DMT400076991	Histone deacetylase	chr08	Histone deacetylase	PGSC0003DMP400052177	PGSC0003DMG400029944	PGSC0003DMC400052177	PGSC0003DMT400076991	27.3.55	RNA.regulation of transcription.HDA	pgsc0003dmp400052177	highly similar to ( 542) AT5G26040 | Symbols: HDA2 | HDA2; histone deacetylase | chr5:9099321-9101598 REVERSEvery weakly similar to (80.5) HDAC_MAIZE Probable histone deacetylase (RPD3 homolog) - Zea mays (Maize)highly similar to ( 542) loc_os06g37420 12006.m091722 protein histone deacetylase 11, putative, expressedAcuC Hist_deacetyl PGSC0003DMT400076991
CUST_32798_PI426222305	1.13156	2.25392	1.12167	2.88411	1.20386	2.99737	PGSC0003DMT400065127	Huntingtin interacting protein	chr04	Huntingtin interacting protein	PGSC0003DMP400043917	PGSC0003DMG402025314	PGSC0003DMC400043917	PGSC0003DMT400065127	27.3.69	RNA.regulation of transcription.SET-domain transcriptional regulator family	pgsc0003dmp400043917	weakly similar to ( 102) AT1G77300 | Symbols: EFS, SDG8 | EFS (EARLY FLOWERING IN SHORT DAYS); histone methyltransferase(H3-K36 specific) / histone methyltransferase(H3-K4 specific) | chr1:29040936-29048810 REVERSE PGSC0003DMT400065127	GO:0005634	GO:0008270;GO:0018024
CUST_17576_PI426222305	1.12271	2.36947	1.57702	3.52091	1.34372	4.97612	PGSC0003DMT400001465	Conserved gene of unknown function	chr03	Conserved gene of unknown function	PGSC0003DMP400001089	PGSC0003DMG400000539	PGSC0003DMC400001089	PGSC0003DMT400001465	27.3.68	RNA.regulation of transcription.PWWP domain protein	pgsc0003dmp400001089	weakly similar to ( 176) AT3G21295 | Symbols: | FUNCTIONS IN: molecular_function unknown; INVOLVED IN: biological_process unknown; LOCATED IN: cellular_component unknown; CONTAINS InterPro DOMAIN/s: PWWP (InterPro:IPR000313); BEST Arabidopsis thaliana protein match is: unknown protein (TAIR:AT1G51745.1); Has 428 Blast hits to 314 proteins in 77 species: Archae - 0; Bacteria - 111; Metazoa - 87; F…
CUST_27024_PI426222305	1.1137	3.00176	1.09756	7.77614	1.42585	5.56237	PGSC0003DMT400052714	Conserved gene of unknown function	chr06	Conserved gene of unknown function	PGSC0003DMP400035538	PGSC0003DMG400020461	PGSC0003DMC400035538	PGSC0003DMT400052714	27.3.25	RNA.regulation of transcription.MYB domain transcription factor family	pgsc0003dmp400035538	moderately similar to ( 469) AT4G21065 | Symbols: | FUNCTIONS IN: molecular_function unknown; INVOLVED IN: biological_process unknown; CONTAINS InterPro DOMAIN/s: Pentatricopeptide repeat (InterPro:IPR002885); BEST Arabidopsis thaliana protein match is: pentatricopeptide (PPR) repeat-containing protein (TAIR:AT4G33170.1); Has 16184 Blast hits to 5257 proteins in 175 species: Archae - 0; Bacteria …
CUST_36050_PI426222305	1.11118	2.17742	1.03798	6.93009	1.57025	3.25737	PGSC0003DMT400058558	SOC1 2	chr08	MADS box transcription factor	PGSC0003DMP400039436	PGSC0003DMG400022748	PGSC0003DMC400039436	PGSC0003DMT400058558	27.3.24	RNA.regulation of transcription.MADS box transcription factor family	pgsc0003dmp400039436	weakly similar to ( 106) AT4G11880 | Symbols: AGL14 | AGL14 (agamous-like 14); DNA binding / transcription factor | chr4:7143512-7147108 FORWARDweakly similar to ( 103) MAD56_ORYSA MADS-box transcription factor 56 (OsMADS56) (FDRMADS8) (RMADS214) - Oryza sativa (Rice)weakly similar to ( 103) loc_os03g03100 12003.m34989 protein agamous-like MADS-box protein AGL14, putative, expressedMADS_MEF2_like…	GO:0005634	GO:0003700;GO:0003677;GO:0046983
CUST_26493_PI426222305	1.10885	2.06772	1.25314	5.04394	1.89566	4.38393	PGSC0003DMT400037157	Methyl binding domain protein	chr03	Methyl binding domain protein	PGSC0003DMP400025237	PGSC0003DMG400014327	PGSC0003DMC400025237	PGSC0003DMT400037157	27.3.59	RNA.regulation of transcription.Methyl binding domain proteins	pgsc0003dmp400025237	very weakly similar to (87.0) loc_os04g19684 12004.m35566 protein methyl-CpG binding domain containing protein, expressed PGSC0003DMT400037157
CUST_51047_PI426222305	1.10783	3.43915	1.58927	5.43505	1.80438	3.50708	PGSC0003DMT400002805	AT hook motif-containing protein	chr12	AT hook motif-containing protein	PGSC0003DMP400002028	PGSC0003DMG400001090	PGSC0003DMC400002028	PGSC0003DMT400002805	27.3.67	RNA.regulation of transcription.putative transcription regulator	pgsc0003dmp400002028	weakly similar to ( 103) AT5G54930 | Symbols: | AT hook motif-containing protein | chr5:22305897-22306839 REVERSE PGSC0003DMT400002805
CUST_39482_PI426222305	1.09681	2.21955	1.09272	3.97418	1.09991	4.06326	PGSC0003DMT400019070	MADS-box protein GLO1	chr08	MADS-box protein GLO1	PGSC0003DMP400013090	PGSC0003DMG401007392	PGSC0003DMC400013090	PGSC0003DMT400019070	27.3.24	RNA.regulation of transcription.MADS box transcription factor family	pgsc0003dmp400013090	weakly similar to ( 195) AT5G20240 | Symbols: PI | PI (PISTILLATA); DNA binding / transcription factor | chr5:6829203-6831208 FORWARDmoderately similar to ( 318) GLOB_TOBAC Floral homeotic protein GLOBOSA - Nicotiana tabacum (Common tobacco)weakly similar to ( 181) loc_os01g66030 12001.m43312 protein MADS-box transcription factor 2, putative, expressedMADS_MEF2_like MADS MADS K-box MADS_SRF_like …
CUST_28181_PI426222305	1.09667	2.63428	1.03212	3.12027	1.24143	2.64624	PGSC0003DMT400004269	Transcription factor	chr01	Transcription factor	PGSC0003DMP400003048	PGSC0003DMG400001696	PGSC0003DMC400003048	PGSC0003DMT400004269	27.3.30	RNA.regulation of transcription.Trihelix, Triple-Helix transcription factor family	pgsc0003dmp400003048	weakly similar to ( 179) AT2G44730 | Symbols: | transcription factor | chr2:18437447-18438565 REVERSEvery weakly similar to (97.4) loc_os10g41460 12010.m06910 protein expressed protein PGSC0003DMT400004269
CUST_48387_PI426222305	1.08459	2.06788	1.03773	2.96557	1.31277	3.36939	PGSC0003DMT400011255	XH/XS domain-containing protein	chr06	XH/XS domain-containing protein	PGSC0003DMP400007823	PGSC0003DMG400004408	PGSC0003DMC400007823	PGSC0003DMT400011255	27.3.67	RNA.regulation of transcription.putative transcription regulator	pgsc0003dmp400007823	moderately similar to ( 369) AT3G48670 | Symbols: | XH/XS domain-containing protein / XS zinc finger domain-containing protein | chr3:18031240-18033615 FORWARDmoderately similar to ( 364) loc_os01g44230 12001.m43488 protein transcription factor X1, putative, expressedXS XH PGSC0003DMT400011255
CUST_19940_PI426222305	1.08459	4.72011	1.052	4.49412	1.04095	4.46757	PGSC0003DMT400049447	DELLA protein GAI	chr10	DELLA protein GAI	PGSC0003DMP400033378	PGSC0003DMG400019212	PGSC0003DMC400033378	PGSC0003DMT400049447	27.3.21	RNA.regulation of transcription.GRAS transcription factor family	pgsc0003dmp400033378	moderately similar to ( 226) AT1G14920 | Symbols: GAI, RGA2 | GAI (GIBBERELLIC ACID INSENSITIVE); transcription factor | chr1:5149414-5151015 FORWARDmoderately similar to ( 222) RGA1_BRACM DELLA protein RGA1 (RGA-like protein 1) (BrRGA1) - Brassica campestris (Field mustard)moderately similar to ( 205) loc_os03g49990 12003.m09996 protein DELLA protein SLR1, putative, expressedGRAS PGSC0003DMT4000…
CUST_37770_PI426222305	1.08459	3.32753	1.06885	3.98117	1.02764	4.1272	PGSC0003DMT400053651	DNA binding protein	chr08	DNA binding protein	PGSC0003DMP400036180	PGSC0003DMG400020812	PGSC0003DMC400036180	PGSC0003DMT400053651	27.3.6	RNA.regulation of transcription.bHLH,Basic Helix-Loop-Helix family	pgsc0003dmp400036180	very weakly similar to (82.0) AT1G30670 | Symbols: | basic helix-loop-helix (bHLH) family protein | chr1:10879311-10880188 REVERSE PGSC0003DMT400053651	GO:0005634	GO:0003700;GO:0003677;GO:0046983
CUST_2245_PI426222305	1.08459	2.64876	1.03773	3.91199	1.01521	3.32763	PGSC0003DMT400021653	Transcription factor	chr10	Transcription factor	PGSC0003DMP400014747	PGSC0003DMG400008401	PGSC0003DMC400014747	PGSC0003DMT400021653	27.3.20	RNA.regulation of transcription.G2-like transcription factor family, GARP	pgsc0003dmp400014747	moderately similar to ( 352) AT5G18240 | Symbols: MYR1 | MYR1 (MYb-related protein 1); transcription factor | chr5:6028617-6030573 REVERSEmoderately similar to ( 303) loc_os05g40960 12005.m08272 protein MYR1, putative, expressed PGSC0003DMT400021653
CUST_40863_PI426222305	1.07945	2.09241	1.10853	2.71338	1.01021	2.41707	PGSC0003DMT400053575	Transcription factor HY5	chr08	Transcription factor HY5	PGSC0003DMP400036125	PGSC0003DMG401020784	PGSC0003DMC400036125	PGSC0003DMT400053575	27.3.35	RNA.regulation of transcription.bZIP transcription factor family	pgsc0003dmp400036125	very weakly similar to (92.8) AT5G11260 | Symbols: HY5, TED 5 | HY5 (ELONGATED HYPOCOTYL 5); DNA binding / double-stranded DNA binding / transcription factor | chr5:3593583-3594800 REVERSEvery weakly similar to (97.4) loc_os02g10860 12002.m06384 protein transcription factor HY5, putative, expressed PGSC0003DMT400053575
CUST_30165_PI426222305	1.07864	2.03799	1.14221	2.95175	1.04197	3.80045	PGSC0003DMT400012083	Axial regulator YABBY1	chr08	Axial regulator YABBY1	PGSC0003DMP400008402	PGSC0003DMG400004741	PGSC0003DMC400008402	PGSC0003DMT400012083	27.3.10	RNA.regulation of transcription.C2C2(Zn) YABBY family	pgsc0003dmp400008402	weakly similar to ( 189) AT4G00180 | Symbols: YAB3 | YAB3 (YABBY3); protein binding / transcription factor | chr4:72804-74888 REVERSEweakly similar to ( 119) YAB1_ORYSA Protein YABBY (OsYAB1) (Filamentous flower protein 1) - Oryza sativa (Rice)weakly similar to ( 196) loc_os02g42950 12002.m33795 protein yabby15 protein, putative, expressedYABBY PGSC0003DMT400012083
CUST_34081_PI426222305	1.07824	2.34913	1.03165	4.15418	1.20735	3.86394	PGSC0003DMT400047852	Conserved gene of unknown function	chr09	Conserved gene of unknown function	PGSC0003DMP400032405	PGSC0003DMG402018599	PGSC0003DMC400032405	PGSC0003DMT400047852	27.3.41	RNA.regulation of transcription.B3 transcription factor family	pgsc0003dmp400032405	highly similar to ( 520) AT1G67850 | Symbols: | unknown protein | chr1:25439204-25441904 FORWARDhighly similar to ( 527) loc_os02g19510 12002.m33651 protein lysine ketoglutarate reductase trans-splicing related 1, putative, expressedDUF707 PGSC0003DMT400047852
CUST_21052_PI426222305	1.07205	3.81524	1.30299	3.46577	1.22016	3.62939	PGSC0003DMT400048756	Phytochrome-interacting factor	chr04	Phytochrome-interacting factor	PGSC0003DMP400032989	PGSC0003DMG400018950	PGSC0003DMC400032989	PGSC0003DMT400048756	27.3.6	RNA.regulation of transcription.bHLH,Basic Helix-Loop-Helix family	pgsc0003dmp400032989	weakly similar to ( 117) AT2G20180 | Symbols: PIL5, PIF1 | PIL5 (PHYTOCHROME INTERACTING FACTOR 3-LIKE 5); DNA binding / phytochrome binding / transcription factor | chr2:8704525-8706237 REVERSEweakly similar to ( 118) loc_os12g41650 12012.m073881 protein phytochrome-interacting factor 4, putative, expressed PGSC0003DMT400048756	GO:0005634	GO:0003700;GO:0003677;GO:0046983;GO:0010313
CUST_18562_PI426222305	1.06955	3.24141	1.29659	5.38462	1.23032	4.47639	PGSC0003DMT400005277	Homeobox protein	chr02	Homeobox protein	PGSC0003DMP400003710	PGSC0003DMG400002076	PGSC0003DMC400003710	PGSC0003DMT400005277	27.3.22	RNA.regulation of transcription.HB,Homeobox transcription factor family	pgsc0003dmp400003710	nearly identical (1060) AT4G04890 | Symbols: PDF2 | PDF2 (PROTODERMAL FACTOR 2); DNA binding / transcription factor | chr4:2476970-2480090 REVERSEhighly similar to ( 998) loc_os08g08820 12008.m080098 protein homeobox protein GLABRA2, putative, expressedSTART START START PGSC0003DMT400005277	GO:0005634	GO:0003700;GO:0043565
CUST_36352_PI426222305	1.06077	3.46603	1.01016	4.0526	1.20982	4.29994	PGSC0003DMT400016174	Conserved gene of unknown function	chr01	Conserved gene of unknown function	PGSC0003DMP400011214	PGSC0003DMG400006320	PGSC0003DMC400011214	PGSC0003DMT400016174	27.3.99	RNA.regulation of transcription.unclassified	pgsc0003dmp400011214	weakly similar to ( 111) AT2G27660 | Symbols: | DC1 domain-containing protein | chr2:11798694-11800850 REVERSE PGSC0003DMT400016174
CUST_46045_PI426222305	1.04676	2.13199	1.47979	3.16006	1.02493	2.50256	PGSC0003DMT400040461	Pto-responsive gene 1 protein	chr11	Pto-responsive gene 1 protein	PGSC0003DMP400027452	PGSC0003DMG400015667	PGSC0003DMC400027452	PGSC0003DMT400040461	27.3.7	RNA.regulation of transcription.C2C2(Zn) CO-like, Constans-like zinc finger family	pgsc0003dmp400027452	PGSC0003DMT400040461
CUST_5042_PI426222305	1.04259	2.60898	1.28126	5.72506	1.18802	5.84659	PGSC0003DMT400009307	Transcription factor	chr09	Transcription factor	PGSC0003DMP400006460	PGSC0003DMG400003616	PGSC0003DMC400006460	PGSC0003DMT400009307	27.3.11	RNA.regulation of transcription.C2H2 zinc finger family	pgsc0003dmp400006460	moderately similar to ( 212) AT3G51060 | Symbols: STY1, SRS1 | STY1 (STYLISH 1); protein heterodimerization/ transcription factor | chr3:18964606-18966130 FORWARDweakly similar to ( 149) loc_os06g49830 12006.m09507 protein SHI, putative, expressedDUF702 PGSC0003DMT400009307
CUST_20584_PI426222305	1.04066	2.498	1.29683	3.21599	1.2759	3.82278	PGSC0003DMT400021343	Conserved gene of unknown function	chr10	Conserved gene of unknown function	PGSC0003DMP400014522	PGSC0003DMG401008272	PGSC0003DMC400014522	PGSC0003DMT400021343	27.3.67	RNA.regulation of transcription.putative transcription regulator	pgsc0003dmp400014522	weakly similar to ( 192) AT5G55390 | Symbols: EDM2 | EDM2; transcription factor | chr5:22448152-22454414 REVERSEmoderately similar to ( 213) loc_os08g24952 12008.m26859 protein expressed protein PGSC0003DMT400021343
CUST_14709_PI426222305	1.03858	2.13817	1.72789	3.94993	1.22897	4.35582	PGSC0003DMT400066349	Upstream activation factor subunit UAF30	chr01	Upstream activation factor subunit UAF30	PGSC0003DMP400044723	PGSC0003DMG400025800	PGSC0003DMC400044723	PGSC0003DMT400066349	27.3.44	RNA.regulation of transcription.Chromatin Remodeling Factors	pgsc0003dmp400044723	moderately similar to ( 215) AT3G19080 | Symbols: | SWIB complex BAF60b domain-containing protein | chr3:6596082-6598667 FORWARDmoderately similar to ( 268) loc_os03g55570 12003.m10470 protein SWIB/MDM2 domain containing protein, expressedSWIB SWIB COG5531 PRK06319 PGSC0003DMT400066349
CUST_26453_PI426222305	1.0241	2.3683	1.485	2.69344	1.11111	3.17204	PGSC0003DMT400037154	Methyl binding domain protein	chr03	Methyl binding domain protein	PGSC0003DMP400025234	PGSC0003DMG400014327	PGSC0003DMC400025234	PGSC0003DMT400037154	27.3.59	RNA.regulation of transcription.Methyl binding domain proteins	pgsc0003dmp400025234	PGSC0003DMT400037154
CUST_24114_PI426222305	1.01389	2.72934	1.16939	5.52025	1.66436	3.81111	PGSC0003DMT400059549	PDE191	chr11	PDE191	PGSC0003DMP400040077	PGSC0003DMG400023133	PGSC0003DMC400040077	PGSC0003DMT400059549	27.3.99	RNA.regulation of transcription.unclassified	pgsc0003dmp400040077	moderately similar to ( 425) AT4G38160 | Symbols: pde191 | pde191 (pigment defective 191) | chr4:17902412-17903784 FORWARDmoderately similar to ( 373) loc_os08g40430 12008.m08022 protein PDE191, putative, expressedmTERF PGSC0003DMT400059549	GO:0009507;GO:0005739	GO:0005488
CUST_44778_PI426222305	1.01358	2.11394	1.14333	3.94966	1.01945	3.56431	PGSC0003DMT400087494	Aspartic proteinase nepenthesin-2	chr08	Aspartic proteinase nepenthesin-2	PGSC0003DMP400059169	PGSC0003DMG400037065	PGSC0003DMC400059169	PGSC0003DMT400087494	27.3.99	RNA.regulation of transcription.unclassified	pgsc0003dmp400059169	moderately similar to ( 348) AT1G64830 | Symbols: | aspartyl protease family protein | chr1:24091271-24092566 REVERSEweakly similar to ( 193) loc_os04g37550 12004.m08744 protein aspartic proteinase nepenthesin-2 precursor, putative, expressedAsp PGSC0003DMT400087494		GO:0004190
CUST_18200_PI426222305	1.00199	2.20802	1.08962	2.62777	1.40674	2.68324	PGSC0003DMT400055101	EIL1	chr01	EIL1	PGSC0003DMP400037067	PGSC0003DMG400021381	PGSC0003DMC400037067	PGSC0003DMT400055101	27.3.19	RNA.regulation of transcription.EIN3-like(EIL) transcription factor family	pgsc0003dmp400037067	weakly similar to ( 178) AT1G73730 | Symbols: EIL3, SLIM1 | EIL3 (ETHYLENE-INSENSITIVE3-LIKE3); DNA binding / transcription factor | chr1:27730434-27732363 REVERSEweakly similar to ( 172) loc_os09g31400 12009.m06255 protein ethylene-insensitive3-like protein, putative, expressedEIN3 PGSC0003DMT400055101
CUST_10389_PI426222305	0.998172	2.16002	1.95141	2.42518	1.06376	2.47528	PGSC0003DMT400028986	Set domain protein	chr07	Set domain protein	PGSC0003DMP400019710	PGSC0003DMG402011157	PGSC0003DMC400019710	PGSC0003DMT400028986	27.3.69	RNA.regulation of transcription.SET-domain transcriptional regulator family	pgsc0003dmp400019710	moderately similar to ( 217) AT4G30860 | Symbols: ASHR3, SDG4 | SDG4 (SET DOMAIN GROUP 4); histone methyltransferase | chr4:15024546-15027427 FORWARDweakly similar to ( 171) loc_os08g34370 12008.m07426 protein SET domain containing proteinSET SET PGSC0003DMT400028986	GO:0005634;GO:0000785	GO:0005515;GO:0008270;GO:0018024
CUST_41017_PI426222305	0.976715	2.02742	1.09646	4.61844	1.27287	3.11218	PGSC0003DMT400018996	Nuclear acid binding protein	chr11	Nuclear acid binding protein	PGSC0003DMP400013035	PGSC0003DMG400007361	PGSC0003DMC400013035	PGSC0003DMT400018996	27.3.99	RNA.regulation of transcription.unclassified	pgsc0003dmp400013035	moderately similar to ( 425) AT5G19350 | Symbols: | RNA-binding protein 45 (RBP45), putative | chr5:6518978-6521295 FORWARDvery weakly similar to (87.8) ROC2_NICSY 29 kDa ribonucleoprotein B, chloroplast precursor (CP29B) - Nicotiana sylvestris (Wood tobacco)moderately similar to ( 440) loc_os03g07800 12003.m06292 protein RNA-binding post-transcriptional regulator csx1, putative, expressedCOG0724…
CUST_23354_PI426222305	0.932984	2.48901	1.35298	2.53021	1.24749	3.1201	PGSC0003DMT400010142	DNA binding protein	chr11	DNA binding protein	PGSC0003DMP400007075	PGSC0003DMG400003974	PGSC0003DMC400007075	PGSC0003DMT400010142	27.3.67	RNA.regulation of transcription.putative transcription regulator	pgsc0003dmp400007075	weakly similar to ( 176) AT5G55600 | Symbols: | agenet domain-containing protein / bromo-adjacent homology (BAH) domain-containing protein | chr5:22522232-22524796 REVERSEweakly similar to ( 139) loc_os07g41640 12007.m29252 protein DNA binding protein, putative, expressed PGSC0003DMT400010142		GO:0003676
CUST_2772_PI426222305	0.92763	2.74706	1.2499	3.89659	1.05985	3.40331	PGSC0003DMT400000578	Ccr4-not transcription complex	chr01	Ccr4-not transcription complex	PGSC0003DMP400000436	PGSC0003DMG402000201	PGSC0003DMC400000436	PGSC0003DMT400000578	27.3.67	RNA.regulation of transcription.putative transcription regulator	pgsc0003dmp400000436	weakly similar to ( 170) AT1G02080 | Symbols: | transcriptional regulator-related | chr1:373694-386682 FORWARDweakly similar to ( 174) loc_os10g40780 12010.m21965 protein transcription regulator, putative, expressedCDC39 PGSC0003DMT400000578
CUST_32329_PI426222305	0.915078	2.20114	1.21428	4.18169	1.29923	3.44139	PGSC0003DMT400012607	YEATS domain-containing protein	chr04	YEATS domain-containing protein	PGSC0003DMP400008761	PGSC0003DMG400004929	PGSC0003DMC400008761	PGSC0003DMT400012607	27.3.51	RNA.regulation of transcription.General Transcription, TBP-binding protein	pgsc0003dmp400008761	moderately similar to ( 318) AT5G45600 | Symbols: GAS41, TAF14B | GAS41; protein binding | chr5:18488059-18489666 FORWARDmoderately similar to ( 283) loc_os06g04580 12006.m05188 protein transcription factor TFIIF, putative, expressedYEATS TFG3 PGSC0003DMT400012607
CUST_32796_PI426222305	0.872615	3.03585	1.20643	8.67711	1.92042	4.97699	PGSC0003DMT400050739	Zinc finger protein	chr04	Zinc finger protein	PGSC0003DMP400034244	PGSC0003DMG400019702	PGSC0003DMC400034244	PGSC0003DMT400050739	27.3.99	RNA.regulation of transcription.unclassified	pgsc0003dmp400034244	moderately similar to ( 443) AT4G24630 | Symbols: | receptor/ zinc ion binding | chr4:12714919-12717111 FORWARDmoderately similar to ( 444) loc_os01g64810 12001.m42767 protein palmitoyltransferase ZDHHC9, putative, expressedCOG5273 zf-DHHC PGSC0003DMT400050739	GO:0016021;GO:0005886	GO:0008270;GO:0032440;GO:0016746
CUST_13685_PI426222305	0.839531	2.04129	1.63358	2.43729	1.20868	3.59728	PGSC0003DMT400084214	WRKY transcription factor 27	chr05	WRKY transcription factor 27	PGSC0003DMP400056261	PGSC0003DMG401033880	PGSC0003DMC400056261	PGSC0003DMT400084214	27.3.32	RNA.regulation of transcription.WRKY domain transcription factor family	pgsc0003dmp400056261	very weakly similar to (82.0) AT4G11070 | Symbols: WRKY41, AtWRKY41 | WRKY41; transcription factor | chr4:6759303-6760763 FORWARDvery weakly similar to (83.6) loc_os08g29660 12008.m06969 protein OsWRKY69 - Superfamily of rice TFs having WRKY and zinc finger domains, expressed PGSC0003DMT400084214
CUST_46145_PI426222305	0.715157	4.40425	1.41091	7.97092	1.02797	4.95759	PGSC0003DMT400018574	BZIP transcription factor	chr10	BZIP transcription factor	PGSC0003DMP400012782	PGSC0003DMG400007208	PGSC0003DMC400012782	PGSC0003DMT400018574	27.3.35	RNA.regulation of transcription.bZIP transcription factor family	pgsc0003dmp400012782	moderately similar to ( 243) AT3G56850 | Symbols: AREB3, DPBF3 | AREB3 (ABA-RESPONSIVE ELEMENT BINDING PROTEIN 3); DNA binding / transcription activator/ transcription factor | chr3:21046554-21047894 REVERSEmoderately similar to ( 214) loc_os05g41070 12005.m08283 protein bZIP transcription factor, putative, expressed PGSC0003DMT400018574
CUST_35476_PI426222305	0.593343	2.44994	1.81092	4.21057	1.10345	3.81204	PGSC0003DMT400032546	Homeobox-leucine zipper protein	chr08	Homeobox-leucine zipper protein	PGSC0003DMP400022115	PGSC0003DMG402012500	PGSC0003DMC400022115	PGSC0003DMT400032546	27.3.22	RNA.regulation of transcription.HB,Homeobox transcription factor family	pgsc0003dmp400022115	moderately similar to ( 223) AT5G47370 | Symbols: HAT2 | HAT2; DNA binding / transcription factor/ transcription repressor | chr5:19216482-19217647 REVERSEweakly similar to ( 191) loc_os04g46350 12004.m09585 protein homeobox-leucine zipper protein ATHB-4, putative, expressed PGSC0003DMT400032546	GO:0005634	GO:0003700;GO:0000976
CUST_757_PI426222305	1.23097	2.42458	0.998674	4.7022	1.13881	4.35139	PGSC0003DMT400003268	Repressor, antagonist of e2f-dp complex	chr02	Repressor, antagonist of e2f-dp complex	PGSC0003DMP400002324	PGSC0003DMG400001296	PGSC0003DMC400002324	PGSC0003DMT400003268	27.3.18	RNA.regulation of transcription.E2F/DP transcription factor family	pgsc0003dmp400002324	weakly similar to ( 106) AT3G48160 | Symbols: DEL1, E2L3, E2FE | DEL1 (DP-E2F-LIKE 1); DNA binding / transcription factor | chr3:17783641-17785846 FORWARDweakly similar to ( 126) loc_os02g50630 12002.m10097 protein transcription regulator of the cell cycle TaE2Fe, putative, expressed PGSC0003DMT400003268
CUST_5203_PI426222305	1.10579	2.55382	0.937095	2.79247	1.19611	2.98567	PGSC0003DMT400009277	Transcription factor	chr09	Transcription factor	PGSC0003DMP400006433	PGSC0003DMG400003601	PGSC0003DMC400006433	PGSC0003DMT400009277	27.3.26	RNA.regulation of transcription.MYB-related transcription factor family	pgsc0003dmp400006433	very weakly similar to (96.7) AT1G75250 | Symbols: ATRL6 | ATRL6 (ARABIDOPSIS RAD-LIKE 6); transcription factor | chr1:28244463-28245453 REVERSEvery weakly similar to (89.4) loc_os01g44390 12001.m10695 protein DNA binding protein, putative, expressed PGSC0003DMT400009277
CUST_29729_PI426222305	0.992507	2.33641	0.976974	4.31345	1.07531	4.3171	PGSC0003DMT400047449	Conserved gene of unknown function	chr05	Conserved gene of unknown function	PGSC0003DMP400032126	PGSC0003DMG400018440	PGSC0003DMC400032126	PGSC0003DMT400047449	27.3.69	RNA.regulation of transcription.SET-domain transcriptional regulator family	pgsc0003dmp400032126	moderately similar to ( 418) AT1G26761 | Symbols: | unknown protein | chr1:9250269-9251603 REVERSEmoderately similar to ( 263) loc_os08g33650 12008.m080168 protein expressed protein PGSC0003DMT400047449
CUST_13531_PI426222305	0.978217	2.26588	0.955767	2.8879	1.02239	2.91628	PGSC0003DMT400017697	YA3	chr01	YA3	PGSC0003DMP400012163	PGSC0003DMG400006863	PGSC0003DMC400012163	PGSC0003DMT400017697	27.3.14	RNA.regulation of transcription.CCAAT box binding factor family, HAP2	pgsc0003dmp400012163	weakly similar to ( 107) AT1G17590 | Symbols: NF-YA8 | NF-YA8 (NUCLEAR FACTOR Y, SUBUNIT A8); transcription factor | chr1:6050481-6051984 REVERSEweakly similar to ( 133) loc_os03g48970 12003.m101451 protein nuclear transcription factor Y subunit A-1, putative, expressedCBF CBFB_NFYA PGSC0003DMT400017697
CUST_40814_PI426222305	0.886951	2.44373	0.950475	2.73174	1.04824	2.5842	PGSC0003DMT400073640	Aspartic proteinase nepenthesin-1	chr01	Aspartic proteinase nepenthesin-1	PGSC0003DMP400049830	PGSC0003DMG400028603	PGSC0003DMC400049830	PGSC0003DMT400073640	27.3.99	RNA.regulation of transcription.unclassified	pgsc0003dmp400049830	moderately similar to ( 326) AT3G50050 | Symbols: | aspartyl protease family protein | chr3:18554138-18557115 REVERSEmoderately similar to ( 307) loc_os07g40260 12007.m29392 protein pepsin A, putative, expressedAsp PGSC0003DMT400073640
CUST_6459_PI426222305	0.863063	2.43642	0.8735	3.77541	1.12824	2.72788	PGSC0003DMT400036951	BHLH domain class transcription factor	chr03	BHLH domain class transcription factor	PGSC0003DMP400025090	PGSC0003DMG400014246	PGSC0003DMC400025090	PGSC0003DMT400036951	27.3.6	RNA.regulation of transcription.bHLH,Basic Helix-Loop-Helix family	pgsc0003dmp400025090	moderately similar to ( 311) AT3G26744 | Symbols: ICE1, ATICE1, SCRM | ICE1 (INDUCER OF CBF EXPRESSION 1); DNA binding / transcription activator/ transcription factor | chr3:9832953-9834790 REVERSEmoderately similar to ( 262) loc_os11g32100 12011.m07112 protein helix-loop-helix DNA-binding, putative, expressed PGSC0003DMT400036951
CUST_2586_PI426222305	0.805564	3.27523	0.788908	2.8211	1.28781	2.63856	PGSC0003DMT400072372	Transcription factor	chr10	Transcription factor	PGSC0003DMP400048933	PGSC0003DMG400028164	PGSC0003DMC400048933	PGSC0003DMT400072372	27.3.20	RNA.regulation of transcription.G2-like transcription factor family, GARP	pgsc0003dmp400048933	moderately similar to ( 327) AT3G04030 | Symbols: | myb family transcription factor | chr3:1042920-1044574 REVERSEmoderately similar to ( 278) loc_os03g20900 12003.m07498 protein transfactor-like, putative, expressed PGSC0003DMT400072372
CUST_37196_PI426222305	0.586313	2.21148	0.575374	2.52321	1.00498	3.25296	PGSC0003DMT400029994	Pentatricopeptide repeat-containing protein	chr04	Pentatricopeptide repeat-containing protein	PGSC0003DMP400020388	PGSC0003DMG400011511	PGSC0003DMC400020388	PGSC0003DMT400029994	27.3.25	RNA.regulation of transcription.MYB domain transcription factor family	pgsc0003dmp400020388	highly similar to ( 837) AT2G13600 | Symbols: | pentatricopeptide (PPR) repeat-containing protein | chr2:5671493-5673586 FORWARDvery weakly similar to (95.5) RF1_ORYSA Rf1 protein, mitochondrial precursor (PPR protein) (Fertility restorer) (Restorer for CMS) - Oryza sativa (Rice)highly similar to ( 721) loc_os04g35610 12004.m08650 protein pentatricopeptide repeat protein PPR868-14, putative PGSC0…
CUST_24832_PI426222305	1.80952	2.35377	1.70362	4.87575	0.928882	4.1636	PGSC0003DMT400024052	Calcium-dependent protein kinase substrate protein	chr08	Calcium-dependent protein kinase substrate protein	PGSC0003DMP400016414	PGSC0003DMG400009304	PGSC0003DMC400016414	PGSC0003DMT400024052	27.3.20	RNA.regulation of transcription.G2-like transcription factor family, GARP	pgsc0003dmp400016414	moderately similar to ( 224) AT5G45580 | Symbols: | transcription factor | chr5:18481092-18482598 REVERSEmoderately similar to ( 217) loc_os02g47190 12002.m09754 protein calcium-dependent protein kinase substrate protein, putative, expressed PGSC0003DMT400024052
CUST_1523_PI426222305	1.7708	3.13278	1.61833	2.72826	0.953344	2.80378	PGSC0003DMT400003382	Protein 1	chr02	Protein 1	PGSC0003DMP400002398	PGSC0003DMG400001339	PGSC0003DMC400002398	PGSC0003DMT400003382	27.3.25	RNA.regulation of transcription.MYB domain transcription factor family	pgsc0003dmp400002398	moderately similar to ( 298) AT3G01140 | Symbols: MYB106, AtMYB106 | MYB106 (myb domain protein 106); DNA binding / transcription factor | chr3:46619-48143 REVERSEmoderately similar to ( 204) MYB38_MAIZE Myb-related protein Zm38 - Zea mays (Maize)moderately similar to ( 284) loc_os08g33660 12008.m07356 protein MYB1, putative, expressed PGSC0003DMT400003382
CUST_38205_PI426222305	1.73878	2.30385	1.44163	3.59029	0.831755	2.86596	PGSC0003DMT400054818	Homeobox-leucine zipper protein ATHB-52	chr10	Homeobox-leucine zipper protein ATHB-52	PGSC0003DMP400036873	PGSC0003DMG400021278	PGSC0003DMC400036873	PGSC0003DMT400054818	27.3.22	RNA.regulation of transcription.HB,Homeobox transcription factor family	pgsc0003dmp400036873	very weakly similar to (96.7) AT1G69780 | Symbols: ATHB13 | ATHB13; DNA binding / sequence-specific DNA binding / transcription factor | chr1:26259166-26260465 FORWARDvery weakly similar to (95.5) loc_os03g07450 12003.m06259 protein homeobox-leucine zipper protein HAT7, putative, expressed PGSC0003DMT400054818	GO:0005634	GO:0003700;GO:0043565
CUST_47976_PI426222305	1.67651	3.36517	1.24792	3.64036	0.963769	4.98585	PGSC0003DMT400074397	AP2 domain-containing transcription factor	chr06	AP2 domain-containing transcription factor	PGSC0003DMP400050388	PGSC0003DMG400028913	PGSC0003DMC400050388	PGSC0003DMT400074397	27.3.3	RNA.regulation of transcription.AP2/EREBP, APETALA2/Ethylene-responsive element binding protein family	pgsc0003dmp400050388	weakly similar to ( 174) AT1G16060 | Symbols: | ovule development protein, putative | chr1:5508563-5511609 FORWARDweakly similar to ( 109) BBM1_BRANA Protein BABY BOOM 1 (BnBBM1) - Brassica napus (Rape)weakly similar to ( 140) loc_os09g25600 12009.m60258 protein protein BABY BOOM 2, putative, expressedAP2 AP2 PGSC0003DMT400074397	GO:0005634	GO:0003700;GO:0003677
CUST_12689_PI426222305	1.59008	4.06266	1.43731	3.63266	0.984708	6.75117	PGSC0003DMT400062842	DNA binding protein	chr03	DNA binding protein	PGSC0003DMP400042289	PGSC0003DMG401024463	PGSC0003DMC400042289	PGSC0003DMT400062842	27.3.6	RNA.regulation of transcription.bHLH,Basic Helix-Loop-Helix family	pgsc0003dmp400042289	weakly similar to ( 193) AT5G62610 | Symbols: | basic helix-loop-helix (bHLH) family protein | chr5:25133117-25134600 REVERSEweakly similar to ( 182) loc_os07g09590 12007.m05414 protein bHLH transcription factor, putative, expressed PGSC0003DMT400062842
CUST_39603_PI426222305	1.57837	2.68985	1.01647	3.02019	0.921612	2.81326	PGSC0003DMT400028059	MYC2	chr10	MYC1	PGSC0003DMP400019128	PGSC0003DMG401010822	PGSC0003DMC400019128	PGSC0003DMT400028059	27.3.6	RNA.regulation of transcription.bHLH,Basic Helix-Loop-Helix family	pgsc0003dmp400019128	very weakly similar to (94.0) AT4G00870 | Symbols: | basic helix-loop-helix (bHLH) family protein | chr4:362230-363639 REVERSE PGSC0003DMT400028059
CUST_44118_PI426222305	1.52061	2.12473	1.38788	3.77121	0.939612	3.41526	PGSC0003DMT400055198	Homeodomain leucine-zipper 1	chr02	Homeodomain leucine-zipper 1	PGSC0003DMP400037130	PGSC0003DMG400021423	PGSC0003DMC400037130	PGSC0003DMT400055198	27.3.22	RNA.regulation of transcription.HB,Homeobox transcription factor family	pgsc0003dmp400037130	weakly similar to ( 128) AT2G22800 | Symbols: HAT9 | HAT9; DNA binding / transcription factor | chr2:9704949-9706048 REVERSEvery weakly similar to (89.7) loc_os08g36220 12008.m07611 protein homeobox-leucine zipper protein HAT14, putative, expressed PGSC0003DMT400055198
CUST_38710_PI426222305	1.47095	2.89551	1.45919	3.32746	0.867413	3.97049	PGSC0003DMT400076252	Histone deacetylase	chr09	Histone deacetylase	PGSC0003DMP400051649	PGSC0003DMG400029646	PGSC0003DMC400051649	PGSC0003DMT400076252	27.3.55	RNA.regulation of transcription.HDA	pgsc0003dmp400051649	highly similar to ( 798) AT4G38130 | Symbols: HD1, ATHD1, HDA1, RPD3A, HDA19 | HD1 (HISTONE DEACETYLASE 1); basal transcription repressor/ histone deacetylase/ protein binding | chr4:17896663-17899057 REVERSEhighly similar to ( 706) HDAC_MAIZE Probable histone deacetylase (RPD3 homolog) - Zea mays (Maize)highly similar to ( 757) loc_os06g38470 12006.m32104 protein histone deacetylase, putative, e…
CUST_6414_PI426222305	1.43534	2.74619	1.4483	2.8274	0.94467	3.43946	PGSC0003DMT400051037	Pentatricopeptide repeat-containing protein	chr03	Pentatricopeptide repeat-containing protein	PGSC0003DMP400034420	PGSC0003DMG400019817	PGSC0003DMC400034420	PGSC0003DMT400051037	27.3.25	RNA.regulation of transcription.MYB domain transcription factor family	pgsc0003dmp400034420	highly similar to ( 739) AT3G15930 | Symbols: | pentatricopeptide (PPR) repeat-containing protein | chr3:5387444-5389690 FORWARDweakly similar to ( 117) RF1_ORYSA Rf1 protein, mitochondrial precursor (PPR protein) (Fertility restorer) (Restorer for CMS) - Oryza sativa (Rice)highly similar to ( 660) loc_os01g08120 12001.m07437 protein pentatricopeptide repeat protein PPR868-14, putative, expressed…
CUST_22559_PI426222305	1.43331	3.76867	1.09876	3.16197	0.934693	3.02463	PGSC0003DMT400078264	LOB domain-containing protein	chr06	LOB domain-containing protein	PGSC0003DMP400053001	PGSC0003DMG400030461	PGSC0003DMC400053001	PGSC0003DMT400078264	27.3.37	RNA.regulation of transcription.AS2,Lateral Organ Boundaries Gene Family	pgsc0003dmp400053001	weakly similar to ( 198) AT2G30340 | Symbols: LBD13 | LBD13 (LOB DOMAIN-CONTAINING PROTEIN 13) | chr2:12931306-12932540 REVERSEweakly similar to ( 186) loc_os05g07270 12005.m05251 protein LOB domain protein 25, putativeDUF260 PGSC0003DMT400078264
CUST_46238_PI426222305	1.4242	3.33295	1.196	3.6806	0.910573	3.23508	PGSC0003DMT400053301	Protein argonaute PNH1	chr12	Protein argonaute PNH1	PGSC0003DMP400035958	PGSC0003DMG400020685	PGSC0003DMC400035958	PGSC0003DMT400053301	27.3.36	RNA.regulation of transcription.Argonaute	pgsc0003dmp400035958	nearly identical (1304) AT5G43810 | Symbols: ZLL, PNH, AGO10 | ZLL (ZWILLE); translation initiation factor | chr5:17611939-17616562 FORWARDnearly identical (1343) loc_os06g39640 12006.m08501 protein PINHEAD protein, putative, expressedPiwi_ago-like Piwi Piwi_piwi-like_Euk Piwi-like PAZ_argonaute_like PAZ PGSC0003DMT400053301
CUST_42790_PI426222305	1.40474	2.21683	1.03773	2.80688	0.972327	3.09204	PGSC0003DMT400033740	Transcription factor HBP-1b(C1)	chr05	Transcription factor HBP-1b(C1)	PGSC0003DMP400022958	PGSC0003DMG400012962	PGSC0003DMC400022958	PGSC0003DMT400033740	27.3.35	RNA.regulation of transcription.bZIP transcription factor family	pgsc0003dmp400022958	moderately similar to ( 318) AT1G68640 | Symbols: PAN | PAN (PERIANTHIA); DNA binding / transcription factor | chr1:25769739-25772303 REVERSEmoderately similar to ( 306) HBP1C_WHEAT Transcription factor HBP-1b(c1) (Fragment) - Triticum aestivum (Wheat)moderately similar to ( 301) loc_os01g59350 12001.m42738 protein transcription factor HBP-1b, putative, expressed PGSC0003DMT400033740
CUST_28093_PI426222305	1.39538	3.14407	1.14087	5.42906	0.972327	4.13034	PGSC0003DMT400004515	ESC	chr01	ESC	PGSC0003DMP400003212	PGSC0003DMG400001796	PGSC0003DMC400003212	PGSC0003DMT400004515	27.3.67	RNA.regulation of transcription.putative transcription regulator	pgsc0003dmp400003212	weakly similar to ( 130) AT2G35270 | Symbols: | DNA-binding protein-related | chr2:14857021-14857878 FORWARDweakly similar to ( 114) loc_os04g50030 12004.m09935 protein DNA-binding protein, putative, expressedDUF296 PGSC0003DMT400004515
CUST_10666_PI426222305	1.37545	2.56673	1.5076	2.64102	0.993573	2.43119	PGSC0003DMT400031791	DNA binding protein	chr08	DNA binding protein	PGSC0003DMP400021558	PGSC0003DMG401012197	PGSC0003DMC400021558	PGSC0003DMT400031791	27.3.67	RNA.regulation of transcription.putative transcription regulator	pgsc0003dmp400021558	very weakly similar to (84.3) AT4G11400 | Symbols: | ARID/BRIGHT DNA-binding domain-containing protein / ELM2 domain-containing protein / Myb-like DNA-binding domain-containing protein | chr4:6938717-6940539 FORWARD PGSC0003DMT400031791	GO:0005622	GO:0003677
CUST_33180_PI426222305	1.32584	3.01788	1.62222	4.71885	0.97029	4.14477	PGSC0003DMT400067664	DNA binding protein	chr08	DNA binding protein	PGSC0003DMP400045681	PGSC0003DMG400026314	PGSC0003DMC400045681	PGSC0003DMT400067664	27.3.41	RNA.regulation of transcription.B3 transcription factor family	pgsc0003dmp400045681	weakly similar to ( 107) AT2G24700 | Symbols: | transcriptional factor B3 family protein | chr2:10513049-10515288 REVERSE PGSC0003DMT400067664	GO:0005634	GO:0003677
CUST_25301_PI426222305	1.29847	2.14535	1.03773	4.12446	0.972327	3.70432	PGSC0003DMT400086852	DNA binding protein	chr11	DNA binding protein	PGSC0003DMP400058527	PGSC0003DMG400036423	PGSC0003DMC400058527	PGSC0003DMT400086852	27.3.67	RNA.regulation of transcription.putative transcription regulator	pgsc0003dmp400058527	moderately similar to ( 264) AT1G66170 | Symbols: MMD1 | MMD1 (MALE MEIOCYTE DEATH 1); DNA binding / protein binding / zinc ion binding | chr1:24638793-24641222 REVERSEweakly similar to ( 180) loc_os03g50780 12003.m10064 protein PHD-finger family protein, expressed PGSC0003DMT400086852
CUST_44141_PI426222305	1.24875	2.85123	1.41351	5.58544	0.982797	4.0611	PGSC0003DMT400055211	AP2 domain-containing transcription factor	chr02	AP2 domain-containing transcription factor	PGSC0003DMP400037142	PGSC0003DMG402021429	PGSC0003DMC400037142	PGSC0003DMT400055211	27.3.3	RNA.regulation of transcription.AP2/EREBP, APETALA2/Ethylene-responsive element binding protein family	pgsc0003dmp400037142	weakly similar to ( 109) AT4G37750 | Symbols: ANT, DRG, CKC, CKC1 | ANT (AINTEGUMENTA); DNA binding / transcription factor | chr4:17739782-17742189 FORWARDvery weakly similar to (89.4) BBM1_BRANA Protein BABY BOOM 1 (BnBBM1) - Brassica napus (Rape)weakly similar to ( 122) loc_os03g56050 12003.m10516 protein ANT-like protein, putative, expressed PGSC0003DMT400055211
CUST_40801_PI426222305	1.24323	2.47768	1.08899	3.78911	0.8731	2.80208	PGSC0003DMT400073639	Aspartic proteinase nepenthesin-1	chr01	Aspartic proteinase nepenthesin-1	PGSC0003DMP400049829	PGSC0003DMG400028603	PGSC0003DMC400049829	PGSC0003DMT400073639	27.3.99	RNA.regulation of transcription.unclassified	pgsc0003dmp400049829	moderately similar to ( 325) AT3G50050 | Symbols: | aspartyl protease family protein | chr3:18554138-18557115 REVERSEmoderately similar to ( 306) loc_os07g40260 12007.m29392 protein pepsin A, putative, expressedAsp PGSC0003DMT400073639
CUST_41143_PI426222305	1.21613	2.33036	1.32523	4.08281	0.772771	2.36373	PGSC0003DMT400004393	I-box binding factor	chr09	I-box binding factor	PGSC0003DMP400003133	PGSC0003DMG400001749	PGSC0003DMC400003133	PGSC0003DMT400004393	27.3.26	RNA.regulation of transcription.MYB-related transcription factor family	pgsc0003dmp400003133	weakly similar to ( 144) AT5G08520 | Symbols: | myb family transcription factor | chr5:2755470-2757741 REVERSEweakly similar to ( 134) loc_os01g63460 12001.m12462 protein MYB transcription factor, putative, expressed PGSC0003DMT400004393
CUST_22211_PI426222305	1.20781	2.25312	1.41582	3.7829	0.980631	3.52383	PGSC0003DMT400047622	HD-ZIP	chr03	HD-ZIP	PGSC0003DMP400032249	PGSC0003DMG400018509	PGSC0003DMC400032249	PGSC0003DMT400047622	27.3.22	RNA.regulation of transcription.HB,Homeobox transcription factor family	pgsc0003dmp400032249	weakly similar to ( 116) AT2G46680 | Symbols: ATHB-7, ATHB7 | ATHB-7 (ARABIDOPSIS THALIANA HOMEOBOX 7); transcription activator/ transcription factor | chr2:19165777-19166773 REVERSEweakly similar to ( 120) loc_os09g35910 12009.m22175 protein homeodomain-leucine zipper transcription factor TaHDZipI-1, putative, expressed PGSC0003DMT400047622
CUST_30230_PI426222305	1.18317	2.67249	1.44693	4.18703	0.950249	3.51465	PGSC0003DMT400012290	Electron transporter	chr08	Electron transporter	PGSC0003DMP400008541	PGSC0003DMG400004820	PGSC0003DMC400008541	PGSC0003DMT400012290	27.3.27	RNA.regulation of transcription.NAC domain transcription factor family	pgsc0003dmp400008541	moderately similar to ( 286) AT5G47380 | Symbols: | unknown protein | chr5:19221472-19224471 REVERSEmoderately similar to ( 280) loc_os10g41040 12010.m06869 protein expressed protein PGSC0003DMT400012290
CUST_17585_PI426222305	1.16701	2.29199	1.05015	2.58348	0.976742	2.58881	PGSC0003DMT400001588	PTAC15	chr03	PTAC15	PGSC0003DMP400001184	PGSC0003DMG400000587	PGSC0003DMC400001184	PGSC0003DMT400001588	27.3.99	RNA.regulation of transcription.unclassified	pgsc0003dmp400001184	moderately similar to ( 461) AT5G54180 | Symbols: PTAC15 | PTAC15 (PLASTID TRANSCRIPTIONALLY ACTIVE15) | chr5:21988544-21990183 FORWARDvery weakly similar to (83.2) loc_os02g39040 12002.m08992 protein mTERF-like protein, putative, expressedmTERF PGSC0003DMT400001588
CUST_41253_PI426222305	1.16136	2.15271	1.46619	3.3761	0.880377	2.60916	PGSC0003DMT400077141	Conserved gene of unknown function		Conserved gene of unknown function	PGSC0003DMP400052271	PGSC0003DMG400029999	PGSC0003DMC400052271	PGSC0003DMT400077141	27.3.67	RNA.regulation of transcription.putative transcription regulator	pgsc0003dmp400052271	moderately similar to ( 384) AT2G33490 | Symbols: | hydroxyproline-rich glycoprotein family protein | chr2:14183552-14187666 FORWARDmoderately similar to ( 330) loc_os04g32370 12004.m08335 protein expressed protein PGSC0003DMT400077141
CUST_22832_PI426222305	1.14396	3.07064	1.15293	3.87719	0.896549	3.63803	PGSC0003DMT400077958	XH/XS domain-containing protein	chr06	XH/XS domain-containing protein	PGSC0003DMP400052770	PGSC0003DMG400030322	PGSC0003DMC400052770	PGSC0003DMT400077958	27.3.67	RNA.regulation of transcription.putative transcription regulator	pgsc0003dmp400052770	moderately similar to ( 379) AT1G13790 | Symbols: | XH/XS domain-containing protein / XS zinc finger domain-containing protein | chr1:4727438-4730229 FORWARDmoderately similar to ( 330) loc_os01g03570 12001.m06995 protein transcription factor X1, putative, expressedXH XS PGSC0003DMT400077958
CUST_38350_PI426222305	1.14263	2.85767	1.16925	2.13745	0.962173	2.16219	PGSC0003DMT400045820	DNA binding protein	chr07	DNA binding protein	PGSC0003DMP400031052	PGSC0003DMG400017766	PGSC0003DMC400031052	PGSC0003DMT400045820	27.3.6	RNA.regulation of transcription.bHLH,Basic Helix-Loop-Helix family	pgsc0003dmp400031052	weakly similar to ( 186) AT1G72210 | Symbols: | basic helix-loop-helix (bHLH) family protein (bHLH096) | chr1:27180066-27182268 FORWARDweakly similar to ( 185) loc_os10g23050 12010.m05310 protein helix-loop-helix DNA-binding, putative, expressed PGSC0003DMT400045820		GO:0046983
CUST_52091_PI426222305	1.14077	2.12578	1.74405	4.24055	0.96765	2.35212	PGSC0003DMT400022704	DNA binding protein		DNA binding protein	PGSC0003DMP400015470	PGSC0003DMG400008805	PGSC0003DMC400015470	PGSC0003DMT400022704	27.3.6	RNA.regulation of transcription.bHLH,Basic Helix-Loop-Helix family	pgsc0003dmp400015470	moderately similar to ( 266) AT1G68920 | Symbols: | basic helix-loop-helix (bHLH) family protein | chr1:25915620-25917675 FORWARDweakly similar to ( 198) loc_os06g16400 12006.m32045 protein BHLH transcription factor, putative, expressed PGSC0003DMT400022704
CUST_13608_PI426222305	1.13548	2.38347	1.03773	2.91131	0.972327	2.68497	PGSC0003DMT400017709	MYB20	chr01	MYB20	PGSC0003DMP400012169	PGSC0003DMG400006868	PGSC0003DMC400012169	PGSC0003DMT400017709	27.3.25	RNA.regulation of transcription.MYB domain transcription factor family	pgsc0003dmp400012169	moderately similar to ( 213) AT5G12870 | Symbols: ATMYB46, MYB46 | MYB46 (MYB DOMAIN PROTEIN 46); DNA binding / transcription factor | chr5:4062939-4064939 REVERSEweakly similar to ( 183) MYB3_HORVU Myb-related protein Hv33 - Hordeum vulgare (Barley)moderately similar to ( 213) loc_os12g33070 12012.m07105 protein myb transcription factor, putative, expressed PGSC0003DMT400017709
CUST_28379_PI426222305	1.13444	3.12508	1.00361	3.66524	0.934152	3.35387	PGSC0003DMT400044175	Zinc finger	chr09	Zinc finger	PGSC0003DMP400029951	PGSC0003DMG400017148	PGSC0003DMC400029951	PGSC0003DMT400044175	27.3.7	RNA.regulation of transcription.C2C2(Zn) CO-like, Constans-like zinc finger family	pgsc0003dmp400029951	weakly similar to ( 185) AT1G04500 | Symbols: | zinc finger CONSTANS-related | chr1:1221757-1224235 REVERSEweakly similar to ( 117) loc_os10g32900 12010.m065283 protein CCT motif family protein, expressed PGSC0003DMT400044175
CUST_27710_PI426222305	1.13406	2.45288	1.03773	3.36723	0.972327	2.90732	PGSC0003DMT400035433	RWP-RK domain-containing protein	chr11	RWP-RK domain-containing protein	PGSC0003DMP400024092	PGSC0003DMG401013613	PGSC0003DMC400024092	PGSC0003DMT400035433	27.3.60	RNA.regulation of transcription.NIN-like bZIP-related family	pgsc0003dmp400024092	weakly similar to ( 153) AT4G24020 | Symbols: NLP7 | NLP7 (NIN LIKE PROTEIN 7); transcription factor | chr4:12479904-12483822 FORWARDweakly similar to ( 128) loc_os01g13540 12001.m07963 protein NIN-like protein 1, putative, expressed PGSC0003DMT400035433
CUST_29935_PI426222305	1.09714	2.83604	1.28422	4.81717	0.942072	3.51975	PGSC0003DMT400051253	Transcription factor	chr08	Transcription factor	PGSC0003DMP400034558	PGSC0003DMG400019904	PGSC0003DMC400034558	PGSC0003DMT400051253	27.3.29	RNA.regulation of transcription.TCP transcription factor family	pgsc0003dmp400034558	weakly similar to ( 111) AT4G18390 | Symbols: | TCP family transcription factor, putative | chr4:10163212-10164309 REVERSEweakly similar to ( 103) loc_os07g05720 12007.m05036 protein TCP family transcription factor containing protein, expressedTCP PGSC0003DMT400051253
CUST_1278_PI426222305	1.0923	2.65997	1.30645	3.99041	0.983533	3.64091	PGSC0003DMT400003349	R2R3 Myb30 transcription factor	chr02	R2R3 Myb30 transcription factor	PGSC0003DMP400002379	PGSC0003DMG400001325	PGSC0003DMC400002379	PGSC0003DMT400003349	27.3.25	RNA.regulation of transcription.MYB domain transcription factor family	pgsc0003dmp400002379	moderately similar to ( 268) AT3G47600 | Symbols: MYB94, ATMYBCP70, ATMYB94 | ATMYB94 (MYB DOMAIN PROTEIN 94); DNA binding / transcription factor | chr3:17539627-17541035 REVERSEweakly similar to ( 171) MYB4_ORYSA Myb-related protein Myb4 (OsMyb4) (Transcription factor RLTR1) - Oryza sativa (Rice)moderately similar to ( 264) loc_os08g33940 12008.m07384 protein MYB96, putative, expressed PGSC0003D…
CUST_3680_PI426222305	1.09028	2.27396	1.19883	2.14402	0.934759	2.05844	PGSC0003DMT400010252	ALCATRAZ/SPATULA	chr10	ALCATRAZ/SPATULA	PGSC0003DMP400007151	PGSC0003DMG400004011	PGSC0003DMC400007151	PGSC0003DMT400010252	27.3.6	RNA.regulation of transcription.bHLH,Basic Helix-Loop-Helix family	pgsc0003dmp400007151	weakly similar to ( 144) AT4G36930 | Symbols: SPT | SPT (SPATULA); DNA binding / transcription factor | chr4:17414167-17415945 FORWARDweakly similar to ( 135) loc_os06g06900 12006.m05415 protein helix-loop-helix DNA-binding domain containing protein, expressed PGSC0003DMT400010252
CUST_34567_PI426222305	1.09019	2.57241	1.10825	4.84705	0.972327	4.36556	PGSC0003DMT400086589	Mads box protein	chr04	Mads box protein	PGSC0003DMP400058264	PGSC0003DMG400036160	PGSC0003DMC400058264	PGSC0003DMT400086589	27.3.24	RNA.regulation of transcription.MADS box transcription factor family	pgsc0003dmp400058264	weakly similar to ( 150) AT5G60440 | Symbols: AGL62 | AGL62 (Agamous-like 62); DNA binding / transcription factor | chr5:24306329-24307520 FORWARDvery weakly similar to (86.7) loc_os06g22760 12006.m06929 protein MADS-box transcription factor 47, putativeMADS_MEF2_like MADS MADS PGSC0003DMT400086589
CUST_41966_PI426222305	1.08751	3.83658	1.38026	8.93099	0.961829	3.95404	PGSC0003DMT400080267	Homeobox-leucine zipper family protein	chr11	Homeobox-leucine zipper family protein	PGSC0003DMP400054452	PGSC0003DMG400031247	PGSC0003DMC400054452	PGSC0003DMT400080267	27.3.22	RNA.regulation of transcription.HB,Homeobox transcription factor family	pgsc0003dmp400054452	weakly similar to ( 184) AT4G03250 | Symbols: | homeobox-leucine zipper family protein | chr4:1425622-1427744 FORWARD PGSC0003DMT400080267
CUST_26984_PI426222305	1.08662	2.19718	1.1545	2.55006	0.942348	2.15225	PGSC0003DMT400052747	PHD-finger family protein	chr06	PHD-finger family protein	PGSC0003DMP400035558	PGSC0003DMG400020472	PGSC0003DMC400035558	PGSC0003DMT400052747	27.3.99	RNA.regulation of transcription.unclassified	pgsc0003dmp400035558	very weakly similar to (85.1) AT5G61120 | Symbols: | INVOLVED IN: biological_process unknown; EXPRESSED IN: 8 plant structures; EXPRESSED DURING: 6 growth stages; BEST Arabidopsis thaliana protein match is: nucleic acid binding (TAIR:AT5G61090.1); Has 77 Blast hits to 70 proteins in 8 species: Archae - 0; Bacteria - 0; Metazoa - 20; Fungi - 0; Plants - 56; Viruses - 0; Other Eukaryotes - 1 (sourc…
CUST_30252_PI426222305	1.08459	2.70802	1.31622	3.79039	0.972327	4.75646	PGSC0003DMT400012106	Conserved gene of unknown function	chr08	Conserved gene of unknown function	PGSC0003DMP400008420	PGSC0003DMG400004753	PGSC0003DMC400008420	PGSC0003DMT400012106	27.3.67	RNA.regulation of transcription.putative transcription regulator	pgsc0003dmp400008420	highly similar to ( 647) AT1G63850 | Symbols: | PRLI-interacting factor-related | chr1:23696962-23698708 FORWARDhighly similar to ( 658) loc_os04g49060 12004.m09841 protein protein binding protein, putative, expressed PGSC0003DMT400012106
CUST_31670_PI426222305	1.08459	2.40823	1.47517	4.50193	0.972327	4.98716	PGSC0003DMT400085892	Type I MADS box transcription factor	chr05	Type I MADS box transcription factor	PGSC0003DMP400057567	PGSC0003DMG400035463	PGSC0003DMC400057567	PGSC0003DMT400085892	27.3.24	RNA.regulation of transcription.MADS box transcription factor family	pgsc0003dmp400057567	PGSC0003DMT400085892
CUST_46785_PI426222305	1.08459	2.07094	1.1596	4.27759	0.972327	3.00079	PGSC0003DMT400001924	Transcription factor	chr01	Transcription factor	PGSC0003DMP400001422	PGSC0003DMG400000730	PGSC0003DMC400001422	PGSC0003DMT400001924	27.3.26	RNA.regulation of transcription.MYB-related transcription factor family	pgsc0003dmp400001422	weakly similar to ( 103) AT1G75250 | Symbols: ATRL6 | ATRL6 (ARABIDOPSIS RAD-LIKE 6); transcription factor | chr1:28244463-28245453 REVERSEvery weakly similar to (94.0) loc_os05g50340 12005.m09103 protein RADIALIS, putative, expressed PGSC0003DMT400001924
CUST_49434_PI426222305	1.08459	2.47288	1.03773	4.00366	0.972327	2.46901	PGSC0003DMT400051194	WRKY transcription factor	chr10	WRKY transcription factor	PGSC0003DMP400034520	PGSC0003DMG400019884	PGSC0003DMC400034520	PGSC0003DMT400051194	27.3.32	RNA.regulation of transcription.WRKY domain transcription factor family	pgsc0003dmp400034520	weakly similar to ( 116) AT4G11070 | Symbols: WRKY41, AtWRKY41 | WRKY41; transcription factor | chr4:6759303-6760763 FORWARDweakly similar to ( 125) loc_os08g29660 12008.m06969 protein OsWRKY69 - Superfamily of rice TFs having WRKY and zinc finger domains, expressedWRKY PGSC0003DMT400051194
CUST_31899_PI426222305	1.08459	2.79171	1.03773	3.79385	0.972327	3.83363	PGSC0003DMT400015926	DNA binding protein	chr10	DNA binding protein	PGSC0003DMP400011042	PGSC0003DMG400006228	PGSC0003DMC400011042	PGSC0003DMT400015926	27.3.59	RNA.regulation of transcription.Methyl binding domain proteins	pgsc0003dmp400011042	PGSC0003DMT400015926	GO:0005720;GO:0010370	GO:0008327;GO:0043621
CUST_41233_PI426222305	1.08459	2.31582	1.03773	3.68854	0.972327	3.67552	PGSC0003DMT400055873	Zinc ion binding protein	chr03	Zinc ion binding protein	PGSC0003DMP400037627	PGSC0003DMG400021700	PGSC0003DMC400037627	PGSC0003DMT400055873	27.3.99	RNA.regulation of transcription.unclassified	pgsc0003dmp400037627	highly similar to ( 565) AT2G39830 | Symbols: DAR2 | DAR2 (DA1-RELATED PROTEIN 2); zinc ion binding | chr2:16619950-16623658 REVERSEmoderately similar to ( 479) loc_os03g16090 12003.m101288 protein zinc ion binding protein, putative, expressed PGSC0003DMT400055873
CUST_21019_PI426222305	1.08459	2.25974	1.03773	3.3801	0.972327	3.48139	PGSC0003DMT400087801	Mads box protein	chr09	Mads box protein	PGSC0003DMP400059476	PGSC0003DMG400037372	PGSC0003DMC400059476	PGSC0003DMT400087801	27.3.24	RNA.regulation of transcription.MADS box transcription factor family	pgsc0003dmp400059476	PGSC0003DMT400087801	GO:0005634	GO:0003700;GO:0003677;GO:0046983
CUST_21784_PI426222305	1.08459	2.21434	1.03773	3.2677	0.977992	3.46116	PGSC0003DMT400056725	WRKY1a transcription factor	chr02	WRKY1a transcription factor	PGSC0003DMP400038147	PGSC0003DMG400022063	PGSC0003DMC400038147	PGSC0003DMT400056725	27.3.32	RNA.regulation of transcription.WRKY domain transcription factor family	pgsc0003dmp400038147	moderately similar to ( 302) AT1G62300 | Symbols: WRKY6, ATWRKY6 | WRKY6; transcription factor | chr1:23016887-23019155 REVERSEmoderately similar to ( 286) loc_os01g14440 12001.m08049 protein OsWRKY1v2 - Superfamily of rice TFs having WRKY and zinc finger domains, expressedWRKY PGSC0003DMT400056725
CUST_39349_PI426222305	1.08459	2.09275	1.03773	3.42971	0.972327	3.58216	PGSC0003DMT400030388	WRKY-type transcription factor	chr09	WRKY-type transcription factor	PGSC0003DMP400020631	PGSC0003DMG400011633	PGSC0003DMC400020631	PGSC0003DMT400030388	27.3.32	RNA.regulation of transcription.WRKY domain transcription factor family	pgsc0003dmp400020631	moderately similar to ( 224) AT2G38470 | Symbols: WRKY33, ATWRKY33 | WRKY33; transcription factor | chr2:16108476-16110539 FORWARDmoderately similar to ( 234) loc_os01g61080 12001.m12235 protein OsWRKY24 - Superfamily of rice TFs having WRKY and zinc finger domains, expressedWRKY PGSC0003DMT400030388
CUST_41129_PI426222305	1.08459	2.59391	1.03773	4.97462	0.972327	3.91964	PGSC0003DMT400004394	I-box binding factor	chr09	I-box binding factor	PGSC0003DMP400003134	PGSC0003DMG400001750	PGSC0003DMC400003134	PGSC0003DMT400004394	27.3.26	RNA.regulation of transcription.MYB-related transcription factor family	pgsc0003dmp400003134	weakly similar to ( 119) AT5G08520 | Symbols: | myb family transcription factor | chr5:2755470-2757741 REVERSEweakly similar to ( 112) loc_os04g58020 12004.m10684 protein DNA binding protein, putative, expressed PGSC0003DMT400004394
CUST_17312_PI426222305	1.08459	2.67688	1.36755	4.89436	0.972327	4.39557	PGSC0003DMT400057849	SVP-like floral repressor	chr01	SVP-like floral repressor	PGSC0003DMP400038948	PGSC0003DMG400022462	PGSC0003DMC400038948	PGSC0003DMT400057849	27.3.24	RNA.regulation of transcription.MADS box transcription factor family	pgsc0003dmp400038948	PGSC0003DMT400057849
CUST_43928_PI426222305	1.08459	2.89724	1.04355	4.80503	0.972327	5.43586	PGSC0003DMT400045323	Auxin response factor ARF16	chr10	Auxin response factor ARF16	PGSC0003DMP400030712	PGSC0003DMG400017585	PGSC0003DMC400030712	PGSC0003DMT400045323	27.3.4	RNA.regulation of transcription.ARF, Auxin Response Factor family	pgsc0003dmp400030712	very weakly similar to (82.8) AT4G30080 | Symbols: ARF16 | ARF16 (AUXIN RESPONSE FACTOR 16); miRNA binding / transcription factor | chr4:14703369-14705564 REVERSEweakly similar to ( 150) loc_os06g47150 12006.m091768 protein auxin response factor 16, putative, expressed PGSC0003DMT400045323
CUST_23104_PI426222305	1.08459	2.59443	1.03773	4.01223	0.972327	3.92592	PGSC0003DMT400076760	DNA binding protein	chr10	Conserved gene of unknown function	PGSC0003DMP400052018	PGSC0003DMG400029853	PGSC0003DMC400052018	PGSC0003DMT400076760	27.3.6	RNA.regulation of transcription.bHLH,Basic Helix-Loop-Helix family	pgsc0003dmp400052018	PGSC0003DMT400076760		GO:0005488
CUST_14514_PI426222305	1.08459	2.79041	1.3112	3.87133	0.972327	3.94547	PGSC0003DMT400066261	Transcription factor bHLH95	chr01	Transcription factor bHLH95	PGSC0003DMP400044663	PGSC0003DMG400025782	PGSC0003DMC400044663	PGSC0003DMT400066261	27.3.6	RNA.regulation of transcription.bHLH,Basic Helix-Loop-Helix family	pgsc0003dmp400044663	weakly similar to ( 158) AT1G49770 | Symbols: RGE1, ZOU | RGE1 (RETARDED GROWTH OF EMBRYO 1); DNA binding / transcription factor | chr1:18424578-18426531 FORWARDweakly similar to ( 123) loc_os04g35010 12004.m08593 protein DNA binding protein, putative, expressed PGSC0003DMT400066261
CUST_4347_PI426222305	1.08459	2.26425	1.41905	3.75722	0.972327	3.83268	PGSC0003DMT400065601	Early flowering 3	chr11	Early flowering 3	PGSC0003DMP400044263	PGSC0003DMG400025519	PGSC0003DMC400044263	PGSC0003DMT400065601	27.3.47	RNA.regulation of transcription.ELF3	pgsc0003dmp400044263	weakly similar to ( 174) AT2G25930 | Symbols: ELF3, PYK20 | ELF3 (EARLY FLOWERING 3); protein C-terminus binding / transcription factor | chr2:11059459-11063178 FORWARDweakly similar to ( 187) loc_os06g05060 12006.m05235 protein early flowering 3, putative, expressed PGSC0003DMT400065601
CUST_3824_PI426222305	1.08459	3.97476	1.03773	3.74678	0.972327	3.5387	PGSC0003DMT400093174	Transcription factor hy5	chr09	Transcription factor hy5	PGSC0003DMP400064849	PGSC0003DMG400042745	PGSC0003DMC400064849	PGSC0003DMT400093174	27.3.35	RNA.regulation of transcription.bZIP transcription factor family	pgsc0003dmp400064849	weakly similar to ( 103) AT3G10800 | Symbols: BZIP28 | BZIP28; DNA binding / transcription factor | chr3:3379326-3381430 FORWARD PGSC0003DMT400093174
CUST_47505_PI426222305	1.08459	2.00507	1.03773	3.51323	0.98046	3.00029	PGSC0003DMT400093647	Mads box protein	chr09	Mads box protein	PGSC0003DMP400065322	PGSC0003DMG400043218	PGSC0003DMC400065322	PGSC0003DMT400093647	27.3.24	RNA.regulation of transcription.MADS box transcription factor family	pgsc0003dmp400065322	PGSC0003DMT400093647	GO:0005634	GO:0003700;GO:0003677;GO:0046983
CUST_50334_PI426222305	1.08459	2.55525	1.03773	3.47513	0.972327	3.19066	PGSC0003DMT400045832	Homeobox-leucine zipper protein ATHB-40	chr03	Homeobox-leucine zipper protein ATHB-40	PGSC0003DMP400031061	PGSC0003DMG400017775	PGSC0003DMC400031061	PGSC0003DMT400045832	27.3.22	RNA.regulation of transcription.HB,Homeobox transcription factor family	pgsc0003dmp400031061	weakly similar to ( 145) AT4G36740 | Symbols: HB-5, ATHB40 | ATHB40 (ARABIDOPSIS THALIANA HOMEOBOX PROTEIN 40); DNA binding / transcription factor | chr4:17314649-17316314 REVERSEweakly similar to ( 121) loc_os07g39320 12007.m08174 protein DNA binding protein, putative, expressed PGSC0003DMT400045832
CUST_21232_PI426222305	1.08459	2.67717	1.31584	3.4679	0.972327	3.61615	PGSC0003DMT400020244	Roothairless1/slippery	chr12	Roothairless1/slippery	PGSC0003DMP400013796	PGSC0003DMG400007827	PGSC0003DMC400013796	PGSC0003DMT400020244	27.3.6	RNA.regulation of transcription.bHLH,Basic Helix-Loop-Helix family	pgsc0003dmp400013796	weakly similar to ( 164) AT2G24260 | Symbols: | basic helix-loop-helix (bHLH) family protein | chr2:10319646-10322177 REVERSEweakly similar to ( 146) loc_os09g25040 12009.m05657 protein BHLH transcription factor, putative, expressed PGSC0003DMT400020244	GO:0005634	GO:0003700;GO:0003677;GO:0046983
CUST_44385_PI426222305	1.08459	2.09836	1.27952	3.30169	0.986264	3.26665	PGSC0003DMT400041067	Dehydration-responsive element-binding protein 2E	chr10	Dehydration-responsive element-binding protein 2E	PGSC0003DMP400027846	PGSC0003DMG401015891	PGSC0003DMC400027846	PGSC0003DMT400041067	27.3.3	RNA.regulation of transcription.AP2/EREBP, APETALA2/Ethylene-responsive element binding protein family	pgsc0003dmp400027846	very weakly similar to (89.0) AT2G38340 | Symbols: | AP2 domain-containing transcription factor, putative (DRE2B) | chr2:16067447-16068181 REVERSEvery weakly similar to (92.0) loc_os01g07120 12001.m07339 protein dehydration-responsive element-binding protein 2A, putative, expressedAP2 AP2 PGSC0003DMT400041067		GO:0003700;GO:0003677
CUST_25167_PI426222305	1.08459	2.70821	1.28772	3.25488	0.972913	3.419	PGSC0003DMT400014983	MYB transcription factor MYB92	chr08	MYB transcription factor MYB92	PGSC0003DMP400010367	PGSC0003DMG400005848	PGSC0003DMC400010367	PGSC0003DMT400014983	27.3.25	RNA.regulation of transcription.MYB domain transcription factor family	pgsc0003dmp400010367	weakly similar to ( 199) AT3G13540 | Symbols: ATMYB5 | ATMYB5 (MYB DOMAIN PROTEIN 5); DNA binding / transcription factor | chr3:4420239-4421443 FORWARDweakly similar to ( 198) MYBC_MAIZE Anthocyanin regulatory C1 protein - Zea mays (Maize)weakly similar to ( 197) loc_os11g07890 12011.m04985 protein transposon protein, putative, CACTA, En/Spm sub-class PGSC0003DMT400014983
CUST_25244_PI426222305	1.08459	2.54046	1.1344	3.23254	0.977085	3.41877	PGSC0003DMT400014818	Protein KTI12	chr08	Protein KTI12	PGSC0003DMP400010258	PGSC0003DMG400005786	PGSC0003DMC400010258	PGSC0003DMT400014818	27.3	RNA.regulation of transcription	pgsc0003dmp400010258	moderately similar to ( 323) AT1G13870 | Symbols: DRL1 | DRL1 (DEFORMED ROOTS AND LEAVES 1); calmodulin binding / purine nucleotide binding | chr1:4747437-4748345 REVERSEKTI12 COG4088 PGSC0003DMT400014818
CUST_11951_PI426222305	1.08459	2.17442	1.69862	3.65749	0.974714	3.51519	PGSC0003DMT400085905	Type I MADS box transcription factor	chr12	Type I MADS box transcription factor	PGSC0003DMP400057580	PGSC0003DMG400035476	PGSC0003DMC400057580	PGSC0003DMT400085905	27.3.24	RNA.regulation of transcription.MADS box transcription factor family	pgsc0003dmp400057580	very weakly similar to (88.2) loc_os01g18440 12001.m08384 protein MADS-box transcription factor PHERES2, putative PGSC0003DMT400085905	GO:0005634	GO:0003700;GO:0003677;GO:0046983
CUST_31624_PI426222305	1.08459	3.21412	1.37718	4.17327	0.976225	4.34382	PGSC0003DMT400035129	Leafy cotyledon1	chr05	Leafy cotyledon1	PGSC0003DMP400023883	PGSC0003DMG402013505	PGSC0003DMC400023883	PGSC0003DMT400035129	27.3.15	RNA.regulation of transcription.CCAAT box binding factor family, HAP3	pgsc0003dmp400023883	weakly similar to ( 130) AT5G47670 | Symbols: NF-YB6 | NF-YB6 (NUCLEAR FACTOR Y, SUBUNIT B6); transcription activator/ transcription activator binding / transcription factor | chr5:19315358-19315975 FORWARDweakly similar to ( 110) NFYB3_ORYSA Nuclear transcription factor Y subunit B-3 (OsNF-YB-3) (Transcriptional activator HAP3B) - Oryza sativa (Rice)weakly similar to ( 124) loc_os02g49370 12002.…
CUST_37214_PI426222305	1.08443	2.30573	1.45135	2.79334	0.972187	2.60169	PGSC0003DMT400082464	Transcription factor NF-Y CCAAT-binding	chr04	Transcription factor NF-Y CCAAT-binding	PGSC0003DMP400055611	PGSC0003DMG400032552	PGSC0003DMC400055611	PGSC0003DMT400082464	27.3.15	RNA.regulation of transcription.CCAAT box binding factor family, HAP3	pgsc0003dmp400055611	weakly similar to ( 171) AT4G14540 | Symbols: NF-YB3 | NF-YB3 (NUCLEAR FACTOR Y, SUBUNIT B3); transcription factor | chr4:8344663-8345148 FORWARDweakly similar to ( 164) NFYB_MAIZE Nuclear transcription factor Y subunit B (NF-YB) (CAAT-box DNA-binding protein subunit B) - Zea mays (Maize)weakly similar to ( 165) loc_os08g07740 12008.m04912 protein nuclear transcription factor Y subunit B-3, putat…
CUST_40887_PI426222305	1.08396	2.99969	1.34725	4.73899	0.971762	4.35581	PGSC0003DMT400053576	Transcription factor HY5	chr08	Transcription factor HY5	PGSC0003DMP400036126	PGSC0003DMG401020784	PGSC0003DMC400036126	PGSC0003DMT400053576	27.3.35	RNA.regulation of transcription.bZIP transcription factor family	pgsc0003dmp400036126	weakly similar to ( 112) AT5G11260 | Symbols: HY5, TED 5 | HY5 (ELONGATED HYPOCOTYL 5); DNA binding / double-stranded DNA binding / transcription factor | chr5:3593583-3594800 REVERSEweakly similar to ( 105) loc_os02g10860 12002.m06384 protein transcription factor HY5, putative, expressed PGSC0003DMT400053576
CUST_18021_PI426222305	1.08389	2.63065	1.04122	4.33132	0.987076	4.04528	PGSC0003DMT400032303	Conserved gene of unknown function	chr07	Conserved gene of unknown function	PGSC0003DMP400021940	PGSC0003DMG400012407	PGSC0003DMC400021940	PGSC0003DMT400032303	27.3.6	RNA.regulation of transcription.bHLH,Basic Helix-Loop-Helix family	pgsc0003dmp400021940	moderately similar to ( 429) AT5G53900 | Symbols: | unknown protein | chr5:21881375-21883133 REVERSEmoderately similar to ( 386) loc_os11g25920 12011.m06514 protein EMB1444, putative, expressed PGSC0003DMT400032303
CUST_34872_PI426222305	1.08078	2.63086	1.13657	3.52749	0.923499	3.42011	PGSC0003DMT400073134	Floral homeotic protein AGAMOUS	chr02	Floral homeotic protein AGAMOUS	PGSC0003DMP400049482	PGSC0003DMG400028442	PGSC0003DMC400049482	PGSC0003DMT400073134	27.3.24	RNA.regulation of transcription.MADS box transcription factor family	pgsc0003dmp400049482	moderately similar to ( 293) AT4G18960 | Symbols: AG | AG (AGAMOUS); DNA binding / transcription factor | chr4:10383917-10388272 FORWARDmoderately similar to ( 379) AG_TOBAC Floral homeotic protein AGAMOUS (NAG1) - Nicotiana tabacum (Common tobacco)moderately similar to ( 263) loc_os01g10504 12001.m150506 protein MADS-box transcription factor 3, putative, expressedMADS_MEF2_like K-box MADS MADS M…
CUST_42192_PI426222305	1.08016	2.32637	1.03349	3.07044	0.968359	3.16956	PGSC0003DMT400038197	U box	chr01	U box	PGSC0003DMP400025952	PGSC0003DMG400014733	PGSC0003DMC400025952	PGSC0003DMT400038197	27.3.64	RNA.regulation of transcription.PHOR1	pgsc0003dmp400025952	moderately similar to ( 412) AT2G35930 | Symbols: PUB23 | PUB23 (PLANT U-BOX 23); ubiquitin-protein ligase | chr2:15083101-15084336 REVERSEvery weakly similar to (90.1) SPL11_ORYSA Spotted leaf protein 11 (Spotted leaf11) (Cell death-related protein SPL11) - Oryza sativa (Rice)moderately similar to ( 338) loc_os02g33590 12002.m08452 protein ubiquitin-protein ligase, putative, expressedUbox PGSC00…
CUST_20531_PI426222305	1.07892	2.24595	1.08883	2.94023	0.953397	2.86245	PGSC0003DMT400093319	Mads box protein	chr10	Mads box protein	PGSC0003DMP400064994	PGSC0003DMG400042890	PGSC0003DMC400064994	PGSC0003DMT400093319	27.3.24	RNA.regulation of transcription.MADS box transcription factor family	pgsc0003dmp400064994	very weakly similar to (82.0) AT5G60440 | Symbols: AGL62 | AGL62 (Agamous-like 62); DNA binding / transcription factor | chr5:24306329-24307520 FORWARDMADS_MEF2_like PGSC0003DMT400093319	GO:0005634	GO:0003700;GO:0003677;GO:0046983
CUST_27462_PI426222305	1.07576	2.00237	1.39589	3.57682	0.964412	3.43746	PGSC0003DMT400070825	Conserved gene of unknown function	chr04	Conserved gene of unknown function	PGSC0003DMP400047888	PGSC0003DMG400027540	PGSC0003DMC400047888	PGSC0003DMT400070825	27.3.99	RNA.regulation of transcription.unclassified	pgsc0003dmp400047888	weakly similar to ( 169) AT1G21150 | Symbols: | mitochondrial transcription termination factor family protein / mTERF family protein | chr1:7406406-7407578 REVERSEweakly similar to ( 162) loc_os05g33440 12005.m07576 protein mTERF family protein, expressedmTERF PGSC0003DMT400070825
CUST_8152_PI426222305	1.07505	2.94471	1.0319	4.45489	0.982192	4.46369	PGSC0003DMT400075402	Transcription factor	chr12	Transcription factor	PGSC0003DMP400051063	PGSC0003DMG400029327	PGSC0003DMC400051063	PGSC0003DMT400075402	27.3.62	RNA.regulation of transcription.Nucleosome/chromatin assembly factor group	pgsc0003dmp400051063	moderately similar to ( 243) AT1G76110 | Symbols: | high mobility group (HMG1/2) family protein / ARID/BRIGHT DNA-binding domain-containing protein | chr1:28555287-28557465 REVERSEweakly similar to ( 188) loc_os09g37250 12009.m06672 protein ARID/BRIGHT DNA binding domain containing proteinBRIGHT PGSC0003DMT400075402	GO:0005622	GO:0005515;GO:0003677
CUST_519_PI426222305	1.07497	2.55057	1.10328	2.80986	0.876417	2.83549	PGSC0003DMT400033624	Zinc finger homeodomain protein 1	chr04	Zinc finger homeodomain protein 1	PGSC0003DMP400022870	PGSC0003DMG400012913	PGSC0003DMC400022870	PGSC0003DMT400033624	27.3.80	RNA.regulation of transcription.zf-HD	pgsc0003dmp400022870	weakly similar to ( 197) AT4G24660 | Symbols: ATHB22, MEE68 | ATHB22 (HOMEOBOX PROTEIN 22); DNA binding / transcription factor | chr4:12724851-12725513 REVERSEmoderately similar to ( 218) loc_os09g29130 12009.m06064 protein ZF-HD protein dimerisation region containing protein, expressedZF-HD_dimer PGSC0003DMT400033624
CUST_2634_PI426222305	1.07468	2.08526	1.03675	3.41043	0.963445	3.37389	PGSC0003DMT400065613	TAGL11 transcription factor	chr11	TAGL11 transcription factor	PGSC0003DMP400044273	PGSC0003DMG400025525	PGSC0003DMC400044273	PGSC0003DMT400065613	27.3.24	RNA.regulation of transcription.MADS box transcription factor family	pgsc0003dmp400044273	moderately similar to ( 232) AT4G09960 | Symbols: STK, AGL11 | STK (SEEDSTICK); protein binding / transcription factor | chr4:6236713-6240494 REVERSEmoderately similar to ( 222) AG_PETHY Floral homeotic protein AGAMOUS (pMADS3) - Petunia hybrida (Petunia)moderately similar to ( 228) loc_os01g10504 12001.m150506 protein MADS-box transcription factor 3, putative, expressedMADS_MEF2_like MADS MADS M…
CUST_25245_PI426222305	1.07425	2.20351	1.02784	3.61522	0.963063	3.51942	PGSC0003DMT400014949	WRKY transcription factor-30	chr08	WRKY transcription factor-30	PGSC0003DMP400010348	PGSC0003DMG400005835	PGSC0003DMC400010348	PGSC0003DMT400014949	27.3.32	RNA.regulation of transcription.WRKY domain transcription factor family	pgsc0003dmp400010348	weakly similar to ( 189) AT4G23810 | Symbols: WRKY53, ATWRKY53 | WRKY53; DNA binding / protein binding / transcription activator/ transcription factor | chr4:12392666-12393739 REVERSEweakly similar to ( 135) loc_os08g29660 12008.m06969 protein OsWRKY69 - Superfamily of rice TFs having WRKY and zinc finger domains, expressedWRKY PGSC0003DMT400014949
CUST_20994_PI426222305	1.0737	2.04263	1.69058	4.30871	0.962567	4.12085	PGSC0003DMT400048757	Phytochrome-interacting factor	chr09	Phytochrome-interacting factor	PGSC0003DMP400032990	PGSC0003DMG400018950	PGSC0003DMC400032990	PGSC0003DMT400048757	27.3.6	RNA.regulation of transcription.bHLH,Basic Helix-Loop-Helix family	pgsc0003dmp400032990	weakly similar to ( 115) AT2G20180 | Symbols: PIL5, PIF1 | PIL5 (PHYTOCHROME INTERACTING FACTOR 3-LIKE 5); DNA binding / phytochrome binding / transcription factor | chr2:8704525-8706237 REVERSEweakly similar to ( 116) loc_os12g41650 12012.m073881 protein phytochrome-interacting factor 4, putative, expressed PGSC0003DMT400048757		GO:0003674
CUST_14607_PI426222305	1.0726	2.07542	1.08266	4.24288	0.970752	3.93075	PGSC0003DMT400066259	Transcription factor bHLH95	chr01	Transcription factor bHLH95	PGSC0003DMP400044662	PGSC0003DMG400025781	PGSC0003DMC400044662	PGSC0003DMT400066259	27.3.6	RNA.regulation of transcription.bHLH,Basic Helix-Loop-Helix family	pgsc0003dmp400044662	weakly similar to ( 145) AT1G49770 | Symbols: RGE1, ZOU | RGE1 (RETARDED GROWTH OF EMBRYO 1); DNA binding / transcription factor | chr1:18424578-18426531 FORWARDweakly similar to ( 127) loc_os04g35010 12004.m08593 protein DNA binding protein, putative, expressed PGSC0003DMT400066259
CUST_18244_PI426222305	1.06928	2.1251	1.01013	3.16118	0.933778	2.52312	PGSC0003DMT400054946	Spotted leaf protein	chr01	Spotted leaf protein	PGSC0003DMP400036957	PGSC0003DMG400021324	PGSC0003DMC400036957	PGSC0003DMT400054946	27.3.64	RNA.regulation of transcription.PHOR1	pgsc0003dmp400036957	moderately similar to ( 295) AT3G11840 | Symbols: PUB24 | PUB24 (PLANT U-BOX 24); binding / ubiquitin-protein ligase | chr3:3736578-3738250 REVERSEvery weakly similar to (92.4) SPL11_ORYSA Spotted leaf protein 11 (Spotted leaf11) (Cell death-related protein SPL11) - Oryza sativa (Rice)moderately similar to ( 238) loc_os04g58920 12004.m10772 protein ubiquitin-protein ligase, putative, expressedUbo…
CUST_3088_PI426222305	1.06702	2.70255	1.05554	4.20711	0.934955	3.75081	PGSC0003DMT400000577	Ccr4-not transcription complex	chr01	Ccr4-not transcription complex	PGSC0003DMP400000435	PGSC0003DMG402000201	PGSC0003DMC400000435	PGSC0003DMT400000577	27.3.67	RNA.regulation of transcription.putative transcription regulator	pgsc0003dmp400000435	weakly similar to ( 126) AT1G02080 | Symbols: | transcriptional regulator-related | chr1:373694-386682 FORWARDweakly similar to ( 121) loc_os03g01240 12003.m05673 protein CCR4-Not complex component, Not1 family protein, expressed PGSC0003DMT400000577
CUST_31907_PI426222305	1.06555	2.1301	1.01951	3.35456	0.989577	3.32124	PGSC0003DMT400015885	I-box binding factor	chr10	I-box binding factor	PGSC0003DMP400011009	PGSC0003DMG400006209	PGSC0003DMC400011009	PGSC0003DMT400015885	27.3.26	RNA.regulation of transcription.MYB-related transcription factor family	pgsc0003dmp400011009	weakly similar to ( 115) AT5G08520 | Symbols: | myb family transcription factor | chr5:2755470-2757741 REVERSEweakly similar to ( 110) loc_os04g58020 12004.m10684 protein DNA binding protein, putative, expressed PGSC0003DMT400015885		GO:0003677;GO:0003682
CUST_48319_PI426222305	1.06424	2.07916	1.00876	2.60576	0.945183	2.68428	PGSC0003DMT400043205	Double WRKY type transfactor	chr06	Double WRKY type transfactor	PGSC0003DMP400029303	PGSC0003DMG400016769	PGSC0003DMC400029303	PGSC0003DMT400043205	27.3.32	RNA.regulation of transcription.WRKY domain transcription factor family	pgsc0003dmp400029303	weakly similar to ( 197) AT2G38470 | Symbols: WRKY33, ATWRKY33 | WRKY33; transcription factor | chr2:16108476-16110539 FORWARDmoderately similar to ( 235) loc_os01g61080 12001.m12235 protein OsWRKY24 - Superfamily of rice TFs having WRKY and zinc finger domains, expressedWRKY PGSC0003DMT400043205		GO:0003700;GO:0043565
CUST_38331_PI426222305	1.06406	2.81252	1.06794	3.9154	0.953921	4.73901	PGSC0003DMT400045800	MADS-box protein 15	chr12	MADS-box protein 15	PGSC0003DMP400031037	PGSC0003DMG400017760	PGSC0003DMC400031037	PGSC0003DMT400045800	27.3.24	RNA.regulation of transcription.MADS box transcription factor family	pgsc0003dmp400031037	very weakly similar to (90.9) AT5G65080 | Symbols: MAF5, AGL68 | MAF5 (MADS AFFECTING FLOWERING 5); transcription factor | chr5:25997671-26002211 FORWARDvery weakly similar to (89.0) MADS6_ORYSA MADS-box transcription factor 6 (OsMADS6) - Oryza sativa (Rice)very weakly similar to (89.0) loc_os02g45770 12002.m09614 protein MADS-box transcription factor 6, putative, expressedMADS_MEF2_like MADS MAD…	GO:0005634	GO:0003700;GO:0003677;GO:0046983
CUST_27736_PI426222305	1.0613	2.75383	1.0167	3.65598	0.989334	3.90697	PGSC0003DMT400029812	WRKY transcription factor	chr01	WRKY transcription factor	PGSC0003DMP400020289	PGSC0003DMG400011457	PGSC0003DMC400020289	PGSC0003DMT400029812	27.3.32	RNA.regulation of transcription.WRKY domain transcription factor family	pgsc0003dmp400020289	weakly similar to ( 136) AT5G49520 | Symbols: WRKY48, ATWRKY48 | WRKY48; transcription factor | chr5:20090890-20092867 FORWARDweakly similar to ( 134) loc_os01g47560 12001.m10951 protein OsWRKY16 - Superfamily of rice TFs having WRKY and zinc finger domains, expressedWRKY PGSC0003DMT400029812
CUST_27042_PI426222305	1.0606	2.10937	1.34491	2.87678	0.950821	3.03083	PGSC0003DMT400067214	PHD-finger family protein	chr06	PHD-finger family protein	PGSC0003DMP400045344	PGSC0003DMG400026134	PGSC0003DMC400045344	PGSC0003DMT400067214	27.3.99	RNA.regulation of transcription.unclassified	pgsc0003dmp400045344	very weakly similar to (82.4) AT5G16680 | Symbols: | PHD finger family protein | chr5:5467534-5472956 REVERSEvery weakly similar to ( 100) loc_os12g24540 12012.m06285 protein PHD-finger family protein, expressed PGSC0003DMT400067214
CUST_11255_PI426222305	1.0587	2.06447	1.1916	4.9912	0.954103	3.20172	PGSC0003DMT400078484	Conserved gene of unknown function	chr05	Conserved gene of unknown function	PGSC0003DMP400053178	PGSC0003DMG400030550	PGSC0003DMC400053178	PGSC0003DMT400078484	27.3.25	RNA.regulation of transcription.MYB domain transcription factor family	pgsc0003dmp400053178	moderately similar to ( 345) loc_os01g03660 12001.m43443 protein expressed protein PGSC0003DMT400078484
CUST_33814_PI426222305	1.055	2.47083	1.36831	3.66397	0.964802	3.87463	PGSC0003DMT400070964	Type-a response regulator	chr06	Type-a response regulator	PGSC0003DMP400047992	PGSC0003DMG400027597	PGSC0003DMC400047992	PGSC0003DMT400070964	27.3.5	RNA.regulation of transcription.ARR	pgsc0003dmp400047992	weakly similar to ( 189) AT3G56380 | Symbols: ARR17, RR17 | ARR17 (ARABIDOPSIS RESPONSE REGULATOR 17); transcription regulator/ two-component response regulator | chr3:20905480-20906368 FORWARDweakly similar to ( 167) loc_os12g04500 12012.m04444 protein OsRR10 - Rice type-A response regulator, expressed PGSC0003DMT400070964
CUST_31543_PI426222305	1.05242	2.14632	1.14321	2.68334	0.941857	3.01354	PGSC0003DMT400073330	Zinc finger protein	chr06	Zinc finger protein	PGSC0003DMP400049605	PGSC0003DMG400028498	PGSC0003DMC400049605	PGSC0003DMT400073330	27.3.11	RNA.regulation of transcription.C2H2 zinc finger family	pgsc0003dmp400049605	very weakly similar to (83.6) AT5G10970 | Symbols: | zinc finger (C2H2 type) family protein | chr5:3469268-3470086 FORWARD PGSC0003DMT400073330
CUST_49161_PI426222305	1.05138	2.77527	1.27923	3.99649	0.855997	4.34808	PGSC0003DMT400080396	Histone-lysine n-methyltransferase, suvh	chr03	Histone-lysine n-methyltransferase, suvh	PGSC0003DMP400054539	PGSC0003DMG400031305	PGSC0003DMC400054539	PGSC0003DMT400080396	27.3.69	RNA.regulation of transcription.SET-domain transcriptional regulator family	pgsc0003dmp400054539	weakly similar to ( 126) AT2G35160 | Symbols: SUVH5, SGD9 | SUVH5 (SU(VAR)3-9 HOMOLOG 5); histone methyltransferase | chr2:14823562-14825946 FORWARDweakly similar to ( 131) loc_os08g30910 12008.m07091 protein YDG/SRA domain containing protein, expressed PGSC0003DMT400080396
CUST_2838_PI426222305	1.04953	2.25353	1.03564	3.33695	0.962289	3.10268	PGSC0003DMT400000599	WRKY transcription factor	chr01	WRKY transcription factor	PGSC0003DMP400000453	PGSC0003DMG400000211	PGSC0003DMC400000453	PGSC0003DMT400000599	27.3.32	RNA.regulation of transcription.WRKY domain transcription factor family	pgsc0003dmp400000453	weakly similar to ( 133) AT4G11070 | Symbols: WRKY41, AtWRKY41 | WRKY41; transcription factor | chr4:6759303-6760763 FORWARDweakly similar to ( 138) loc_os08g29660 12008.m06969 protein OsWRKY69 - Superfamily of rice TFs having WRKY and zinc finger domains, expressedWRKY PGSC0003DMT400000599
CUST_21795_PI426222305	1.04796	2.47757	1.11298	3.26483	0.943472	3.04829	PGSC0003DMT400056724	WRKY1a transcription factor	chr02	WRKY1a transcription factor	PGSC0003DMP400038146	PGSC0003DMG400022063	PGSC0003DMC400038146	PGSC0003DMT400056724	27.3.32	RNA.regulation of transcription.WRKY domain transcription factor family	pgsc0003dmp400038146	moderately similar to ( 221) AT1G62300 | Symbols: WRKY6, ATWRKY6 | WRKY6; transcription factor | chr1:23016887-23019155 REVERSEweakly similar to ( 192) loc_os01g14440 12001.m08049 protein OsWRKY1v2 - Superfamily of rice TFs having WRKY and zinc finger domains, expressed PGSC0003DMT400056724
CUST_42405_PI426222305	1.04364	3.63154	1.43606	4.12006	0.947338	4.33025	PGSC0003DMT400052799	GATA transcription factor	chr08	GATA transcription factor	PGSC0003DMP400035595	PGSC0003DMG400020491	PGSC0003DMC400035595	PGSC0003DMT400052799	27.3.9	RNA.regulation of transcription.C2C2(Zn) GATA transcription factor family	pgsc0003dmp400035595	moderately similar to ( 297) AT4G17570 | Symbols: | zinc finger (GATA type) family protein | chr4:9784329-9786974 REVERSEmoderately similar to ( 209) loc_os04g46020 12004.m35399 protein GATA transcription factor 29, putative, expressed PGSC0003DMT400052799
CUST_28669_PI426222305	1.04314	3.91676	1.23047	2.22376	0.818486	2.26947	PGSC0003DMT400095852	Mads box protein	chr04	Mads box protein	PGSC0003DMP400067527	PGSC0003DMG400045423	PGSC0003DMC400067527	PGSC0003DMT400095852	27.3.24	RNA.regulation of transcription.MADS box transcription factor family	pgsc0003dmp400067527	weakly similar to ( 101) AT5G60440 | Symbols: AGL62 | AGL62 (Agamous-like 62); DNA binding / transcription factor | chr5:24306329-24307520 FORWARD PGSC0003DMT400095852	GO:0005634	GO:0003677
CUST_15790_PI426222305	1.04308	3.22721	1.67748	3.49575	0.946387	3.62486	PGSC0003DMT400057758	Bromodomain protein	chr08	Bromodomain protein	PGSC0003DMP400038878	PGSC0003DMG400022422	PGSC0003DMC400038878	PGSC0003DMT400057758	27.3.42	RNA.regulation of transcription.Bromodomain proteins	pgsc0003dmp400038878	moderately similar to ( 218) AT1G61215 | Symbols: BRD4 | BRD4 (BROMODOMAIN 4); DNA binding | chr1:22573173-22575374 FORWARDweakly similar to ( 137) loc_os07g37800 12007.m29230 protein DNA binding protein, putative, expressed PGSC0003DMT400057758
CUST_23160_PI426222305	1.02983	2.47674	1.01577	3.83064	0.945326	3.68202	PGSC0003DMT400051266	Homeobox protein GLABRA2	chr09	Homeobox protein GLABRA2	PGSC0003DMP400034569	PGSC0003DMG400019911	PGSC0003DMC400034569	PGSC0003DMT400051266	27.3.22	RNA.regulation of transcription.HB,Homeobox transcription factor family	pgsc0003dmp400034569	moderately similar to ( 232) AT3G03260 | Symbols: HDG8 | HDG8 (HOMEODOMAIN GLABROUS 8); DNA binding / transcription factor | chr3:755356-759234 REVERSEweakly similar to ( 187) loc_os08g04190 12008.m04563 protein homeobox protein FWA, putative, expressedSTART START PGSC0003DMT400051266	GO:0005634	GO:0003700;GO:0043565
CUST_30140_PI426222305	1.02943	2.39723	1.07831	4.51625	0.922878	3.45432	PGSC0003DMT400012295	Electron transporter	chr08	Electron transporter	PGSC0003DMP400008546	PGSC0003DMG400004820	PGSC0003DMC400008546	PGSC0003DMT400012295	27.3.27	RNA.regulation of transcription.NAC domain transcription factor family	pgsc0003dmp400008546	moderately similar to ( 327) AT5G47380 | Symbols: | unknown protein | chr5:19221472-19224471 REVERSEmoderately similar to ( 321) loc_os10g41040 12010.m06869 protein expressed proteinDUF547 PGSC0003DMT400012295
CUST_39202_PI426222305	1.02664	2.8036	1.14567	4.56664	0.931351	3.6903	PGSC0003DMT400065104	DNA-binding protein MNB1B	chr04	DNA-binding protein MNB1B	PGSC0003DMP400043901	PGSC0003DMG400025304	PGSC0003DMC400043901	PGSC0003DMT400065104	27.3.62	RNA.regulation of transcription.Nucleosome/chromatin assembly factor group	pgsc0003dmp400043901	very weakly similar to (90.1) AT5G23420 | Symbols: HMGB6 | HMGB6; transcription factor | chr5:7888712-7890111 REVERSEweakly similar to ( 111) loc_os08g01100 12008.m04259 protein HMG1/2-like protein, putative, expressed PGSC0003DMT400065104
CUST_8053_PI426222305	1.01165	3.07313	1.0755	2.97837	0.571106	4.12514	PGSC0003DMT400075325	Mob1	chr12	Mob1	PGSC0003DMP400051005	PGSC0003DMG400029294	PGSC0003DMC400051005	PGSC0003DMT400075325	27.3.99	RNA.regulation of transcription.unclassified	pgsc0003dmp400051005	moderately similar to ( 410) AT5G45550 | Symbols: | mob1/phocein family protein | chr5:18462284-18464840 FORWARDmoderately similar to ( 399) loc_os03g38020 12003.m08904 protein mps one binder kinase activator-like 1A, putative, expressedMob1_phocein PGSC0003DMT400075325		GO:0003674
CUST_33040_PI426222305	1.01144	3.09592	1.06966	3.39761	0.935107	3.54596	PGSC0003DMT400087771	Type I MADS box transcription factor	chr01	Type I MADS box transcription factor	PGSC0003DMP400059446	PGSC0003DMG400037342	PGSC0003DMC400059446	PGSC0003DMT400087771	27.3.24	RNA.regulation of transcription.MADS box transcription factor family	pgsc0003dmp400059446	PGSC0003DMT400087771	GO:0005634	GO:0003700;GO:0003677;GO:0046983
CUST_18273_PI426222305	1.01092	2.52002	1.21714	4.95247	0.894973	4.19289	PGSC0003DMT400054945	BEL29 protein	chr01	BEL29 protein	PGSC0003DMP400036956	PGSC0003DMG400021323	PGSC0003DMC400036956	PGSC0003DMT400054945	27.3.22	RNA.regulation of transcription.HB,Homeobox transcription factor family	pgsc0003dmp400036956	moderately similar to ( 353) AT2G35940 | Symbols: BLH1 | BLH1 (BEL1-LIKE HOMEODOMAIN 1); DNA binding / protein heterodimerization/ protein homodimerization/ transcription factor | chr2:15089171-15091699 REVERSEmoderately similar to ( 311) loc_os11g06020 12011.m04798 protein BEL1-like homeodomain transcription factor, putative, expressedPOX POX PGSC0003DMT400054945	GO:0005634;GO:0005737	GO:0003700;GO:0043565
CUST_22134_PI426222305	0.999898	4.32862	1.40813	5.14478	0.914763	4.03623	PGSC0003DMT400095805	WRKY transcription factor	chr03	WRKY transcription factor	PGSC0003DMP400067480	PGSC0003DMG400045376	PGSC0003DMC400067480	PGSC0003DMT400095805	27.3.32	RNA.regulation of transcription.WRKY domain transcription factor family	pgsc0003dmp400067480	PGSC0003DMT400095805
CUST_33060_PI426222305	0.996668	6.72901	1.52256	5.9908	0.858402	6.0789	PGSC0003DMT400016051	Methyl binding domain protein	chr01	Methyl binding domain protein	PGSC0003DMP400011121	PGSC0003DMG400006275	PGSC0003DMC400011121	PGSC0003DMT400016051	27.3.59	RNA.regulation of transcription.Methyl binding domain proteins	pgsc0003dmp400011121	weakly similar to ( 166) AT5G35330 | Symbols: MBD02, MBD2 | MBD02 (METHYL-CPG-BINDING DOMAIN PROTEIN 02); DNA binding / DNA demethylase | chr5:13523725-13525270 REVERSEweakly similar to ( 171) loc_os09g32090 12009.m50206 protein methyl-binding domain protein MBD111, putative, expressed PGSC0003DMT400016051	GO:0005634	GO:0003677;GO:0008270
CUST_14429_PI426222305	0.983386	2.18467	1.30029	5.35078	0.971324	3.32261	PGSC0003DMT400066257	Transcription factor bHLH95	chr01	Transcription factor bHLH95	PGSC0003DMP400044661	PGSC0003DMG400025780	PGSC0003DMC400044661	PGSC0003DMT400066257	27.3.6	RNA.regulation of transcription.bHLH,Basic Helix-Loop-Helix family	pgsc0003dmp400044661	weakly similar to ( 142) AT1G49770 | Symbols: RGE1, ZOU | RGE1 (RETARDED GROWTH OF EMBRYO 1); DNA binding / transcription factor | chr1:18424578-18426531 FORWARDweakly similar to ( 126) loc_os04g35010 12004.m08593 protein DNA binding protein, putative, expressed PGSC0003DMT400066257
CUST_5064_PI426222305	0.971387	2.63683	1.27036	3.48175	0.88633	3.60859	PGSC0003DMT400038561	ISWI chromatin remodeling complex ATPase ISW1	chr09	ISWI chromatin remodeling complex ATPase ISW1	PGSC0003DMP400026207	PGSC0003DMG400014895	PGSC0003DMC400026207	PGSC0003DMT400038561	27.3.44	RNA.regulation of transcription.Chromatin Remodeling Factors	pgsc0003dmp400026207	highly similar to ( 978) AT5G66750 | Symbols: DDM1, CHR01, CHR1, CHA1, SOM4, SOM1, ATDDM1 | CHR1 (CHROMATIN REMODELING 1); ATPase/ helicase | chr5:26649050-26652869 FORWARDmoderately similar to ( 411) ISW2_ORYSA Probable chromatin remodelling complex ATPase chain (EC 3.6.1.-) (ISW2-like) (Sucrose nonfermenting protein 2 homolog) - Oryza sativa (Rice)highly similar to ( 844) loc_os03g51230 12003.m…
CUST_27002_PI426222305	0.962963	2.00971	1.01004	3.26356	0.895173	3.39767	PGSC0003DMT400052767	ATP binding protein	chr06	ATP binding protein	PGSC0003DMP400035574	PGSC0003DMG400020478	PGSC0003DMC400035574	PGSC0003DMT400052767	27.3.40	RNA.regulation of transcription.Aux/IAA family	pgsc0003dmp400035574	very weakly similar to (95.1) AT4G32280 | Symbols: IAA29 | IAA29 (INDOLE-3-ACETIC ACID INDUCIBLE 29); transcription factor | chr4:15583479-15584628 FORWARD PGSC0003DMT400052767	GO:0005634	GO:0003700;GO:0046983
CUST_13142_PI426222305	0.961868	2.99363	1.22397	2.92236	0.854043	2.60631	PGSC0003DMT400007473	YABBY domain class transcription factor	chr01	YABBY domain class transcription factor	PGSC0003DMP400005199	PGSC0003DMG400002883	PGSC0003DMC400005199	PGSC0003DMT400007473	27.3.10	RNA.regulation of transcription.C2C2(Zn) YABBY family	pgsc0003dmp400005199	weakly similar to ( 182) AT2G26580 | Symbols: YAB5 | YAB5 (YABBY5); transcription factor | chr2:11303923-11306739 REVERSEweakly similar to ( 113) YAB1_ORYSA Protein YABBY (OsYAB1) (Filamentous flower protein 1) - Oryza sativa (Rice)weakly similar to ( 130) loc_os12g42610 12012.m073892 protein axial regulator YABBY2, putative, expressedYABBY PGSC0003DMT400007473
CUST_7021_PI426222305	0.946992	2.82918	1.21335	3.50395	0.867734	3.35363	PGSC0003DMT400026584	Remorin 2	chr05	Remorin 2	PGSC0003DMP400018145	PGSC0003DMG400010267	PGSC0003DMC400018145	PGSC0003DMT400026584	27.3.99	RNA.regulation of transcription.unclassified	pgsc0003dmp400018145	very weakly similar to (96.3) AT3G61260 | Symbols: | DNA-binding family protein / remorin family protein | chr3:22675403-22676701 REVERSEvery weakly similar to (99.8) REMO_SOLTU Remorin (pp34) - Solanum tuberosum (Potato)weakly similar to ( 108) loc_os04g45070 12004.m35179 protein remorin, putative, expressedRemorin_C PGSC0003DMT400026584
CUST_24901_PI426222305	0.94581	2.62754	1.60848	5.45966	0.983853	4.13104	PGSC0003DMT400024050	Calcium-dependent protein kinase substrate protein	chr08	Calcium-dependent protein kinase substrate protein	PGSC0003DMP400016412	PGSC0003DMG400009304	PGSC0003DMC400016412	PGSC0003DMT400024050	27.3.20	RNA.regulation of transcription.G2-like transcription factor family, GARP	pgsc0003dmp400016412	moderately similar to ( 222) AT5G45580 | Symbols: | transcription factor | chr5:18481092-18482598 REVERSEmoderately similar to ( 219) loc_os02g47190 12002.m09754 protein calcium-dependent protein kinase substrate protein, putative, expressed PGSC0003DMT400024050
CUST_13387_PI426222305	0.942378	2.01069	1.31699	2.05188	0.889628	2.38913	PGSC0003DMT400024757	Transcription factor Myb1	chr07	MYB transcription factor	PGSC0003DMP400016919	PGSC0003DMG400009570	PGSC0003DMC400016919	PGSC0003DMT400024757	27.3.26	RNA.regulation of transcription.MYB-related transcription factor family	pgsc0003dmp400016919	very weakly similar to (92.8) AT5G56840 | Symbols: | DNA-binding family protein | chr5:22980789-22982152 FORWARDvery weakly similar to (94.0) loc_os01g41900 12001.m43086 protein MCB2 protein, putative, expressed PGSC0003DMT400024757
CUST_46747_PI426222305	0.935718	5.11584	1.59877	3.06517	0.829161	2.94528	PGSC0003DMT400065249	Conserved gene of unknown function	chr11	Conserved gene of unknown function	PGSC0003DMP400043993	PGSC0003DMG400025360	PGSC0003DMC400043993	PGSC0003DMT400065249	27.3.67	RNA.regulation of transcription.putative transcription regulator	pgsc0003dmp400043993	highly similar to ( 517) AT5G60050 | Symbols: | PRLI-interacting factor-related | chr5:24183680-24185264 REVERSEmoderately similar to ( 394) loc_os04g49060 12004.m09841 protein protein binding protein, putative, expressed PGSC0003DMT400065249
CUST_8366_PI426222305	0.91279	2.65603	1.6674	3.20836	0.888432	2.57373	PGSC0003DMT400075563	Growth-regulating factor 4	chr12	Growth-regulating factor 4	PGSC0003DMP400051174	PGSC0003DMG400029384	PGSC0003DMC400051174	PGSC0003DMT400075563	27.3.50	RNA.regulation of transcription.General Transcription	pgsc0003dmp400051174	weakly similar to ( 150) AT3G13960 | Symbols: AtGRF5 | AtGRF5 (GROWTH-REGULATING FACTOR 5); transcription activator | chr3:4608526-4610160 FORWARDmoderately similar to ( 221) loc_os02g47280 12002.m09763 protein growth-regulating factor, putative, expressedWRC PGSC0003DMT400075563	GO:0005634	GO:0005515;GO:0005524;GO:0016818
CUST_28722_PI426222305	0.884572	2.05635	1.10897	3.50292	0.801388	3.05811	PGSC0003DMT400083164	DNA binding protein	chr06	DNA binding protein	PGSC0003DMP400055864	PGSC0003DMG400033087	PGSC0003DMC400055864	PGSC0003DMT400083164	27.3.6	RNA.regulation of transcription.bHLH,Basic Helix-Loop-Helix family	pgsc0003dmp400055864	weakly similar to ( 123) AT4G00050 | Symbols: UNE10 | UNE10 (unfertilized embryo sac 10); DNA binding / transcription factor | chr4:17863-19848 FORWARDvery weakly similar to (90.9) loc_os06g06900 12006.m05415 protein helix-loop-helix DNA-binding domain containing protein, expressed PGSC0003DMT400083164		GO:0046983
CUST_6922_PI426222305	0.762733	2.14805	1.42121	2.15948	0.977984	2.73093	PGSC0003DMT400045026	Transcription regulator	chr10	Transcription regulator	PGSC0003DMP400030499	PGSC0003DMG400017458	PGSC0003DMC400030499	PGSC0003DMT400045026	27.3.49	RNA.regulation of transcription.GeBP like	pgsc0003dmp400030499	weakly similar to ( 185) AT5G14280 | Symbols: | DNA-binding storekeeper protein-related | chr5:4609123-4611444 FORWARDweakly similar to ( 160) loc_os05g23700 12005.m06664 protein transcription regulator, putative, expressed PGSC0003DMT400045026
CUST_43804_PI426222305	0.706827	2.16607	1.32345	3.27123	0.633667	3.08457	PGSC0003DMT400040117	CCT	chr11	CCT	PGSC0003DMP400027202	PGSC0003DMG400015524	PGSC0003DMC400027202	PGSC0003DMT400040117	27.3.7	RNA.regulation of transcription.C2C2(Zn) CO-like, Constans-like zinc finger family	pgsc0003dmp400027202	weakly similar to ( 102) AT5G59990 | Symbols: | unknown protein | chr5:24152262-24153084 REVERSEvery weakly similar to (95.5) loc_os05g38990 12005.m08078 protein CCT, putative, expressed PGSC0003DMT400040117
CUST_39891_PI426222305	0.518024	2.06982	1.95033	2.22314	0.960126	4.0539	PGSC0003DMT400047532	Transcription factor	chr08	Transcription factor	PGSC0003DMP400032184	PGSC0003DMG400018472	PGSC0003DMC400032184	PGSC0003DMT400047532	27.3.20	RNA.regulation of transcription.G2-like transcription factor family, GARP	pgsc0003dmp400032184	weakly similar to ( 171) AT1G32240 | Symbols: KAN2 | KAN2 (KANADI 2); DNA binding / transcription factor | chr1:11625882-11630355 REVERSEweakly similar to ( 140) loc_os08g06370 12008.m04776 protein KANADI-like transcription factor FEATHERED, putative, expressed PGSC0003DMT400047532
CUST_8150_PI426222305	1.36181	2.25423	0.989764	3.15874	0.934725	2.96848	PGSC0003DMT400030165	Helix-loop-helix DNA-binding domain containing protein	chr12	Helix-loop-helix DNA-binding domain containing protein	PGSC0003DMP400020498	PGSC0003DMG400011547	PGSC0003DMC400020498	PGSC0003DMT400030165	27.3.6	RNA.regulation of transcription.bHLH,Basic Helix-Loop-Helix family	pgsc0003dmp400020498	very weakly similar to (99.0) AT2G14760 | Symbols: | basic helix-loop-helix protein / bHLH protein | chr2:6322459-6323312 REVERSEweakly similar to ( 101) loc_os07g39940 12007.m08236 protein DNA binding protein, putative PGSC0003DMT400030165
CUST_25511_PI426222305	1.34707	2.44449	0.941107	3.58457	0.930051	2.84948	PGSC0003DMT400029257	MYB transcription factor	chr10	MYB transcription factor	PGSC0003DMP400019914	PGSC0003DMG400011250	PGSC0003DMC400019914	PGSC0003DMT400029257	27.3.25	RNA.regulation of transcription.MYB domain transcription factor family	pgsc0003dmp400019914	moderately similar to ( 273) AT4G21440 | Symbols: ATMYB102, ATM4 | ATMYB102 (ARABIDOPSIS MYB-LIKE 102); DNA binding / transcription factor | chr4:11418425-11419652 REVERSEmoderately similar to ( 210) MYB4_ORYSA Myb-related protein Myb4 (OsMyb4) (Transcription factor RLTR1) - Oryza sativa (Rice)moderately similar to ( 252) loc_os07g37210 12007.m07971 protein MYB transcription factor, putative, exp…
CUST_3686_PI426222305	1.22563	2.86087	0.973267	2.70854	0.885664	3.09188	PGSC0003DMT400010297	AP2 domain class transcription factor	chr02	AP2 domain class transcription factor	PGSC0003DMP400007179	PGSC0003DMG400004025	PGSC0003DMC400007179	PGSC0003DMT400010297	27.3.3	RNA.regulation of transcription.AP2/EREBP, APETALA2/Ethylene-responsive element binding protein family	pgsc0003dmp400007179	weakly similar to ( 101) AT2G47520 | Symbols: | AP2 domain-containing transcription factor, putative | chr2:19502891-19503490 REVERSEvery weakly similar to (99.0) ERF1_ORYSA Ethylene-responsive transcription factor 1 (Ethylene-responsive element-binding factor 1) (EREBP-1) (OsEREBP1) - Oryza sativa (Rice)weakly similar to ( 101) loc_os02g52670 12002.m10297 protein ethylene-responsive element bind…
CUST_35872_PI426222305	1.18119	2.47499	0.918447	3.46964	0.913215	3.02956	PGSC0003DMT400086035	Homeobox protein	chr04	Homeobox protein	PGSC0003DMP400057710	PGSC0003DMG400035606	PGSC0003DMC400057710	PGSC0003DMT400086035	27.3.22	RNA.regulation of transcription.HB,Homeobox transcription factor family	pgsc0003dmp400057710	highly similar to ( 517) AT4G00730 | Symbols: ANL2, AHDP | ANL2 (ANTHOCYANINLESS 2); transcription factor/ transcription regulator | chr4:301071-304103 REVERSEmoderately similar to ( 456) loc_os04g48070 12004.m35428 protein homeobox protein OCL1, putative, expressedSTART START START PGSC0003DMT400086035	GO:0005634	GO:0003700;GO:0043565
CUST_15470_PI426222305	1.16628	2.53997	0.82854	2.4601	0.697781	3.19451	PGSC0003DMT400037453	Auxin response factor 2	chr12	Auxin response factor 2	PGSC0003DMP400025461	PGSC0003DMG400014452	PGSC0003DMC400025461	PGSC0003DMT400037453	27.3.4	RNA.regulation of transcription.ARF, Auxin Response Factor family	pgsc0003dmp400025461	moderately similar to ( 467) AT5G62000 | Symbols: ARF2, ARF1-BP, HSS | ARF2 (AUXIN RESPONSE FACTOR 2); protein binding / transcription factor | chr5:24910859-24914680 FORWARDmoderately similar to ( 419) loc_os11g32110 12011.m07113 protein auxin response factor 2, putative, expressedB3 PGSC0003DMT400037453
CUST_1188_PI426222305	1.11879	2.23478	0.933906	3.27525	0.879209	2.54474	PGSC0003DMT400052107	Bromodomain-containing protein	chr02	Bromodomain-containing protein	PGSC0003DMP400035117	PGSC0003DMG400020226	PGSC0003DMC400035117	PGSC0003DMT400052107	27.3.52	RNA.regulation of transcription.Global transcription factor group	pgsc0003dmp400035117	moderately similar to ( 281) AT3G27260 | Symbols: GTE8 | GTE8; DNA binding | chr3:10068411-10072403 FORWARDmoderately similar to ( 216) loc_os02g38980 12002.m34018 protein global transcription factor group E, putative, expressedBROMO Bromodomain COG5076 PGSC0003DMT400052107		GO:0005515
CUST_19648_PI426222305	1.08922	2.76456	0.896627	2.39207	0.978789	3.43135	PGSC0003DMT400023383	DNA methyltransferase 1-associated protein	chr01	DNA methyltransferase 1-associated protein	PGSC0003DMP400015940	PGSC0003DMG400009054	PGSC0003DMC400015940	PGSC0003DMT400023383	27.3.25	RNA.regulation of transcription.MYB domain transcription factor family	pgsc0003dmp400015940	moderately similar to ( 494) AT2G47210 | Symbols: | myb family transcription factor | chr2:19379039-19382204 FORWARDmoderately similar to ( 484) loc_os05g46330 12005.m08758 protein DNA methyltransferase 1-associated protein 1, putative, expressed PGSC0003DMT400023383	GO:0035267	GO:0003700;GO:0003677;GO:0003682;GO:0008168
CUST_44517_PI426222305	1.03112	3.56352	0.977018	3.81034	0.919799	3.57208	PGSC0003DMT400043013	High mobility group protein	chr03	High mobility group protein	PGSC0003DMP400029169	PGSC0003DMG400016682	PGSC0003DMC400029169	PGSC0003DMT400043013	27.3.62	RNA.regulation of transcription.Nucleosome/chromatin assembly factor group	pgsc0003dmp400029169	very weakly similar to (85.9) AT1G20693 | Symbols: HMGB2, HMG BETA 1, NFD2, NFD02 | HMGB2 (HIGH MOBILITY GROUP B 2); DNA binding / chromatin binding / structural constituent of chromatin / transcription factor | chr1:7177282-7178487 FORWARDvery weakly similar to (92.4) HMGL_IPONI HMG1/2-like protein - Ipomoea nil (Japanese morning glory) (Pharbitis nil)very weakly similar to (87.8) loc_os09g37910…		GO:0005488
CUST_41501_PI426222305	1.02904	2.12866	0.984582	3.34204	0.922531	3.63144	PGSC0003DMT400029797	Nucleic acid binding protein	chr10	Nucleic acid binding protein	PGSC0003DMP400020281	PGSC0003DMG400011450	PGSC0003DMC400020281	PGSC0003DMT400029797	27.3.11	RNA.regulation of transcription.C2H2 zinc finger family	pgsc0003dmp400020281	very weakly similar to ( 100) AT3G58070 | Symbols: GIS | GIS (GLABROUS INFLORESCENCE STEMS); nucleic acid binding / transcription factor/ zinc ion binding | chr3:21506845-21507606 REVERSEvery weakly similar to (87.0) loc_os02g53530 12002.m10382 protein zinc finger protein, putative, expressed PGSC0003DMT400029797
CUST_32231_PI426222305	1.02657	2.02242	0.982222	2.81182	0.92032	2.56259	PGSC0003DMT400027523	Pollen-specific protein SF3	chr04	Transcription factor LIM	PGSC0003DMP400018750	PGSC0003DMG400010609	PGSC0003DMC400018750	PGSC0003DMT400027523	27.3.67	RNA.regulation of transcription.putative transcription regulator	pgsc0003dmp400018750	very weakly similar to ( 100) AT1G10200 | Symbols: WLIM1 | WLIM1; transcription factor/ zinc ion binding | chr1:3346677-3347763 REVERSEvery weakly similar to (89.4) loc_os12g32620 12012.m07062 protein pollen-specific protein SF3, putative, expressed PGSC0003DMT400027523
CUST_33106_PI426222305	1.02592	2.56905	0.981592	4.02807	0.919981	3.83422	PGSC0003DMT400094151	DNA binding protein	chr08	DNA binding protein	PGSC0003DMP400065826	PGSC0003DMG400043722	PGSC0003DMC400065826	PGSC0003DMT400094151	27.3.41	RNA.regulation of transcription.B3 transcription factor family	pgsc0003dmp400065826	weakly similar to ( 139) AT2G24700 | Symbols: | transcriptional factor B3 family protein | chr2:10513049-10515288 REVERSE PGSC0003DMT400094151	GO:0005634	GO:0003677
CUST_51440_PI426222305	1.01883	2.61302	0.974808	3.58663	0.913373	3.25005	PGSC0003DMT400034246	MAR-binding protein		MAR-binding protein	PGSC0003DMP400023301	PGSC0003DMG400013167	PGSC0003DMC400023301	PGSC0003DMT400034246	27.3.67	RNA.regulation of transcription.putative transcription regulator	pgsc0003dmp400023301	very weakly similar to (87.0) loc_os03g22730 12003.m101345 protein nucleolar protein NOP5, putative, expressed PGSC0003DMT400034246
CUST_25286_PI426222305	1.0156	3.85486	0.91095	3.21329	0.623905	3.45762	PGSC0003DMT400034550	Brg-1 associated factor	chr11	Brg-1 associated factor	PGSC0003DMP400023485	PGSC0003DMG400013280	PGSC0003DMC400023485	PGSC0003DMT400034550	27.3.44	RNA.regulation of transcription.Chromatin Remodeling Factors	pgsc0003dmp400023485	moderately similar to ( 257) AT4G22360 | Symbols: | SWIB complex BAF60b domain-containing protein | chr4:11807811-11809660 FORWARDmoderately similar to ( 237) loc_os08g39310 12008.m07912 protein SWIB/MDM2 domain containing protein, expressedSWIB SWIB COG5531 PGSC0003DMT400034550
CUST_2660_PI426222305	1.00641	3.19696	0.980716	3.43552	0.927072	3.80366	PGSC0003DMT400065612	TAGL11 transcription factor	chr11	TAGL11 transcription factor	PGSC0003DMP400044272	PGSC0003DMG400025525	PGSC0003DMC400044272	PGSC0003DMT400065612	27.3.24	RNA.regulation of transcription.MADS box transcription factor family	pgsc0003dmp400044272	weakly similar to ( 191) AT4G09960 | Symbols: STK, AGL11 | STK (SEEDSTICK); protein binding / transcription factor | chr4:6236713-6240494 REVERSEweakly similar to ( 187) MAD21_ORYSA MADS-box transcription factor 21 (OsMADS21) (RMADS207) - Oryza sativa (Rice)weakly similar to ( 187) loc_os01g66290 12001.m42780 protein MADS-box transcritpion factor 21, putative, expressedMADS_MEF2_like MADS MADS MA…	GO:0005634	GO:0003700;GO:0003677;GO:0046983
CUST_35189_PI426222305	0.997214	2.02529	0.867932	2.9703	0.869326	2.6376	PGSC0003DMT400093355	GmMYB29A1 protein	chr03	GmMYB29A1 protein	PGSC0003DMP400065030	PGSC0003DMG400042926	PGSC0003DMC400065030	PGSC0003DMT400093355	27.3.25	RNA.regulation of transcription.MYB domain transcription factor family	pgsc0003dmp400065030	weakly similar to ( 152) AT3G23250 | Symbols: MYB15, ATY19, ATMYB15 | MYB15 (MYB DOMAIN PROTEIN 15); DNA binding / transcription factor | chr3:8309742-8310624 FORWARDweakly similar to ( 152) MYB4_ORYSA Myb-related protein Myb4 (OsMyb4) (Transcription factor RLTR1) - Oryza sativa (Rice)weakly similar to ( 155) loc_os07g37210 12007.m07971 protein MYB transcription factor, putative, expressed PGSC00…		GO:0003677;GO:0003682
CUST_38503_PI426222305	0.995806	2.26976	0.944464	2.70556	0.896758	2.48108	PGSC0003DMT400002011	Asymmetric leaves 2	chr02	Asymmetric leaves 2	PGSC0003DMP400001476	PGSC0003DMG401000764	PGSC0003DMC400001476	PGSC0003DMT400002011	27.3.37	RNA.regulation of transcription.AS2,Lateral Organ Boundaries Gene Family	pgsc0003dmp400001476	moderately similar to ( 205) AT5G66870 | Symbols: ASL1, LBD36 | ASL1 | chr5:26706621-26707562 FORWARDweakly similar to ( 163) loc_os03g41600 12003.m09221 protein ramosa 2, putativeDUF260 PGSC0003DMT400002011
CUST_24305_PI426222305	0.991495	2.29122	0.909312	2.97345	0.74046	3.13723	PGSC0003DMT400062523	Zinc finger CCCH domain-containing protein 13	chr12	Zinc finger CCCH domain-containing protein 13	PGSC0003DMP400042099	PGSC0003DMG401024331	PGSC0003DMC400042099	PGSC0003DMT400062523	27.3.99	RNA.regulation of transcription.unclassified	pgsc0003dmp400042099	very weakly similar to (90.1) loc_os02g06584 12002.m33996 protein zinc finger C-x8-C-x5-C-x3-H type family protein, expressed PGSC0003DMT400062523
CUST_23899_PI426222305	0.970013	3.13407	0.928104	3.42338	0.869613	3.54843	PGSC0003DMT400027733	GATA transcription factor	chr01	GATA transcription factor	PGSC0003DMP400018897	PGSC0003DMG400010684	PGSC0003DMC400018897	PGSC0003DMT400027733	27.3.9	RNA.regulation of transcription.C2C2(Zn) GATA transcription factor family	pgsc0003dmp400018897	weakly similar to ( 185) AT3G21175 | Symbols: ZML1 | ZML1 (ZIM-LIKE 1); transcription factor | chr3:7422832-7423765 FORWARDweakly similar to ( 172) loc_os06g48534 12006.m91852 protein GATA transcription factor 25, putative, expressed PGSC0003DMT400027733		GO:0005515;GO:0003700;GO:0008270;GO:0043565
CUST_34542_PI426222305	0.969039	3.04748	0.927172	3.44901	0.868739	3.78038	PGSC0003DMT400094942	Mads box protein	chr04	Mads box protein	PGSC0003DMP400066617	PGSC0003DMG400044513	PGSC0003DMC400066617	PGSC0003DMT400094942	27.3.24	RNA.regulation of transcription.MADS box transcription factor family	pgsc0003dmp400066617	weakly similar to ( 129) AT5G60440 | Symbols: AGL62 | AGL62 (Agamous-like 62); DNA binding / transcription factor | chr5:24306329-24307520 FORWARDMADS_MEF2_like PGSC0003DMT400094942
CUST_40266_PI426222305	0.963659	2.16079	0.960642	2.85926	0.930251	3.45804	PGSC0003DMT400074783	LOB domain-containing protein	chr06	LOB domain-containing protein	PGSC0003DMP400050651	PGSC0003DMG400029080	PGSC0003DMC400050651	PGSC0003DMT400074783	27.3.37	RNA.regulation of transcription.AS2,Lateral Organ Boundaries Gene Family	pgsc0003dmp400050651	weakly similar to ( 199) AT2G40470 | Symbols: LBD15 | LBD15 (LOB DOMAIN-CONTAINING PROTEIN 15) | chr2:16902430-16903546 REVERSEweakly similar to ( 174) loc_os01g60960 12001.m12223 protein LOB domain protein 25, putative, expressedDUF260 PGSC0003DMT400074783
CUST_21851_PI426222305	0.946978	2.34983	0.923185	3.08949	0.869564	3.10683	PGSC0003DMT400094588	BZIP transcription factor family protein	chr04	BZIP transcription factor family protein	PGSC0003DMP400066263	PGSC0003DMG400044159	PGSC0003DMC400066263	PGSC0003DMT400094588	27.3.35	RNA.regulation of transcription.bZIP transcription factor family	pgsc0003dmp400066263	weakly similar to ( 169) AT2G40950 | Symbols: BZIP17 | BZIP17; DNA binding / transcription activator/ transcription factor | chr2:17087823-17090326 REVERSEweakly similar to ( 155) TGA1B_TOBAC TGACG-sequence-specific DNA-binding protein TGA-1B (TGA1b) (HSBF) (Fragment) - Nicotiana tabacum (Common tobacco)weakly similar to ( 112) loc_os07g44950 12007.m28925 protein DNA binding protein, putative, ex…
CUST_22741_PI426222305	0.939559	2.66483	0.928917	3.8382	0.913227	3.66218	PGSC0003DMT400094570	Myb family transcription factor	chr06	Myb family transcription factor	PGSC0003DMP400066245	PGSC0003DMG400044141	PGSC0003DMC400066245	PGSC0003DMT400094570	27.3.25	RNA.regulation of transcription.MYB domain transcription factor family	pgsc0003dmp400066245	weakly similar to ( 171) AT5G58850 | Symbols: ATMYB119, MYB119 | MYB119 (MYB DOMAIN PROTEIN 119); DNA binding / transcription factor | chr5:23763945-23765441 FORWARDvery weakly similar to (93.6) MYBC_MAIZE Anthocyanin regulatory C1 protein - Zea mays (Maize)weakly similar to ( 152) loc_os06g06740 12006.m05399 protein myb protein, putative, expressedREB1 PGSC0003DMT400094570
CUST_42826_PI426222305	0.933973	2.65038	0.950596	4.20935	0.846521	2.86692	PGSC0003DMT400056558	Pax transcription activation domain interacting protein	chr03	Pax transcription activation domain interacting protein	PGSC0003DMP400038053	PGSC0003DMG401021989	PGSC0003DMC400038053	PGSC0003DMT400056558	27.3.99	RNA.regulation of transcription.unclassified	pgsc0003dmp400038053	moderately similar to ( 223) AT3G21480 | Symbols: | FUNCTIONS IN: molecular_function unknown; INVOLVED IN: biological_process unknown; LOCATED IN: intracellular; CONTAINS InterPro DOMAIN/s: BRCT (InterPro:IPR001357); BEST Arabidopsis thaliana protein match is: transcription coactivator (TAIR:AT4G03130.1); Has 489 Blast hits to 455 proteins in 115 species: Archae - 2; Bacteria - 37; Metazoa - 270;…
CUST_43860_PI426222305	0.919157	2.52438	0.979095	3.12921	0.742114	2.68175	PGSC0003DMT400016306	AP2/ERF domain-containing transcription factor	chr04	AP2/ERF domain-containing transcription factor	PGSC0003DMP400011298	PGSC0003DMG400006369	PGSC0003DMC400011298	PGSC0003DMT400016306	27.3.3	RNA.regulation of transcription.AP2/EREBP, APETALA2/Ethylene-responsive element binding protein family	pgsc0003dmp400011298	very weakly similar to (99.4) AT5G50080 | Symbols: ERF110 | DNA binding / transcription factor | chr5:20365948-20366835 FORWARDvery weakly similar to (81.6) ERF1_ORYSA Ethylene-responsive transcription factor 1 (Ethylene-responsive element-binding factor 1) (EREBP-1) (OsEREBP1) - Oryza sativa (Rice)very weakly similar to (89.7) loc_os04g32620 12004.m08360 protein DNA binding protein, putative, ex…
CUST_8758_PI426222305	0.908341	2.33396	0.979104	4.07413	0.800594	3.39396	PGSC0003DMT400033847	Growth-regulating factor 3	chr07	Growth-regulating factor 3	PGSC0003DMP400023044	PGSC0003DMG400013004	PGSC0003DMC400023044	PGSC0003DMT400033847	27.3.50	RNA.regulation of transcription.General Transcription	pgsc0003dmp400023044	very weakly similar to (94.7) AT3G13960 | Symbols: AtGRF5 | AtGRF5 (GROWTH-REGULATING FACTOR 5); transcription activator | chr3:4608526-4610160 FORWARDweakly similar to ( 111) loc_os06g02560 12006.m04989 protein growth-regulating factor, putative, expressedWRC PGSC0003DMT400033847
CUST_48001_PI426222305	0.904122	2.34263	0.844987	3.37348	0.902618	2.95823	PGSC0003DMT400074390	Aspartic proteinase nepenthesin-1	chr06	Aspartic proteinase nepenthesin-1	PGSC0003DMP400050383	PGSC0003DMG400028911	PGSC0003DMC400050383	PGSC0003DMT400074390	27.3.99	RNA.regulation of transcription.unclassified	pgsc0003dmp400050383	moderately similar to ( 497) AT1G79720 | Symbols: | aspartyl protease family protein | chr1:29997259-29998951 REVERSEmoderately similar to ( 406) loc_os09g25570 12009.m05709 protein aspartic proteinase nepenthesin-2 precursor, putative, expressedAsp PGSC0003DMT400074390	GO:0048046	GO:0003677;GO:0004190
CUST_23814_PI426222305	0.817738	2.41268	0.940626	3.14071	0.772592	2.68071	PGSC0003DMT400021165	Transcription factor ABORTED MICROSPORES	chr08	Transcription factor ABORTED MICROSPORES	PGSC0003DMP400014412	PGSC0003DMG400008195	PGSC0003DMC400014412	PGSC0003DMT400021165	27.3.6	RNA.regulation of transcription.bHLH,Basic Helix-Loop-Helix family	pgsc0003dmp400014412	moderately similar to ( 220) AT2G16910 | Symbols: AMS | AMS (ABORTED MICROSPORES); DNA binding / transcription factor | chr2:7331721-7334077 FORWARDweakly similar to ( 164) loc_os02g02820 12002.m05632 protein helix-loop-helix DNA-binding domain containing protein, expressed PGSC0003DMT400021165	GO:0005634	GO:0003700;GO:0003677;GO:0046983
CUST_36719_PI426222305	0.810433	2.36338	0.798197	2.75913	0.880972	2.3849	PGSC0003DMT400015771	Translation initiation factor if-3	chr01	Translation initiation factor if-3	PGSC0003DMP400010934	PGSC0003DMG400006166	PGSC0003DMC400010934	PGSC0003DMT400015771	27.3.67	RNA.regulation of transcription.putative transcription regulator	pgsc0003dmp400010934	weakly similar to ( 107) AT1G34360 | Symbols: | translation initiation factor 3 (IF-3) family protein | chr1:12542986-12546025 FORWARDweakly similar to ( 137) loc_os02g01110 12002.m05461 protein translation initiation factor, putative, expressedinfC InfC PGSC0003DMT400015771
CUST_50347_PI426222305	0.80527	2.94296	0.814557	3.44632	0.650371	4.13211	PGSC0003DMT400045855	Homeobox protein	chr03	Homeobox protein	PGSC0003DMP400031076	PGSC0003DMG400017787	PGSC0003DMC400031076	PGSC0003DMT400045855	27.3.22	RNA.regulation of transcription.HB,Homeobox transcription factor family	pgsc0003dmp400031076	weakly similar to ( 140) AT4G36740 | Symbols: HB-5, ATHB40 | ATHB40 (ARABIDOPSIS THALIANA HOMEOBOX PROTEIN 40); DNA binding / transcription factor | chr4:17314649-17316314 REVERSEweakly similar to ( 106) loc_os07g39320 12007.m08174 protein DNA binding protein, putative, expressed PGSC0003DMT400045855
CUST_2013_PI426222305	0.787981	2.08681	0.760013	2.93341	0.729265	2.95539	PGSC0003DMT400072369	Transcription factor	chr10	Transcription factor	PGSC0003DMP400048930	PGSC0003DMG400028164	PGSC0003DMC400048930	PGSC0003DMT400072369	27.3.20	RNA.regulation of transcription.G2-like transcription factor family, GARP	pgsc0003dmp400048930	moderately similar to ( 337) AT3G04030 | Symbols: | myb family transcription factor | chr3:1042920-1044574 REVERSEmoderately similar to ( 296) loc_os03g20900 12003.m07498 protein transfactor-like, putative, expressed PGSC0003DMT400072369		GO:0003677
CUST_28753_PI426222305	0.742313	2.48599	0.912289	3.73953	0.919206	2.41271	PGSC0003DMT400083087	Pseudo response regulator	chr06	Sensory transduction histidine kinase	PGSC0003DMP400055805	PGSC0003DMG400033048	PGSC0003DMC400055805	PGSC0003DMT400083087	27.3.66	RNA.regulation of transcription.Psudo ARR transcription factor family	pgsc0003dmp400055805	weakly similar to ( 152) AT5G61380 | Symbols: TOC1, APRR1, PRR1 | TOC1 (TIMING OF CAB EXPRESSION 1); transcription regulator/ two-component response regulator | chr5:24675540-24678176 FORWARDweakly similar to ( 132) PRR1_ORYSA Two-component response regulator-like PRR1 (Pseudo-response regulator 1) (OsPRR1) - Oryza sativa (Rice)weakly similar to ( 132) loc_os02g40510 12002.m33775 protein two-comp…		GO:0005515
CUST_19362_PI426222305	0.711268	2.16551	0.769661	4.18902	0.969694	3.19466	PGSC0003DMT400050585	Transcription factor bHLH49	chr05	Transcription factor bHLH49	PGSC0003DMP400034158	PGSC0003DMG400019659	PGSC0003DMC400034158	PGSC0003DMT400050585	27.3.6	RNA.regulation of transcription.bHLH,Basic Helix-Loop-Helix family	pgsc0003dmp400034158	moderately similar to ( 280) AT1G68920 | Symbols: | basic helix-loop-helix (bHLH) family protein | chr1:25915620-25917675 FORWARDmoderately similar to ( 230) loc_os06g16400 12006.m32045 protein BHLH transcription factor, putative, expressed PGSC0003DMT400050585
CUST_22713_PI426222305	2.18658	1.31842	1.73647	4.17248	1.33074	2.38832	PGSC0003DMT400078031	Zinc finger family protein	chr06	Zinc finger family protein	PGSC0003DMP400052828	PGSC0003DMG401030350	PGSC0003DMC400052828	PGSC0003DMT400078031	27.3.11	RNA.regulation of transcription.C2H2 zinc finger family	pgsc0003dmp400052828	moderately similar to ( 305) AT2G29660 | Symbols: | zinc finger (C2H2 type) family protein | chr2:12679346-12680467 FORWARDmoderately similar to ( 205) loc_os03g15790 12003.m07016 protein nucleic acid binding protein, putative, expressed PGSC0003DMT400078031
CUST_12104_PI426222305	2.08958	1.59355	1.43039	3.7736	1.17663	3.03578	PGSC0003DMT400056778	Conserved gene of unknown function	chr09	Conserved gene of unknown function	PGSC0003DMP400038173	PGSC0003DMG400022079	PGSC0003DMC400038173	PGSC0003DMT400056778	27.3.63	RNA.regulation of transcription.PHD finger transcription factor	pgsc0003dmp400038173	moderately similar to ( 449) AT5G58610 | Symbols: | PHD finger transcription factor, putative | chr5:23686771-23691053 REVERSEmoderately similar to ( 310) loc_os07g49290 12007.m09138 protein DNA binding protein, putative, expressed PGSC0003DMT400056778
CUST_33625_PI426222305	2.24154	1.29156	1.58592	3.27628	0.924974	2.58468	PGSC0003DMT400078736	Anti-silencing protein	chr02	Anti-silencing protein	PGSC0003DMP400053359	PGSC0003DMG400030634	PGSC0003DMC400053359	PGSC0003DMT400078736	27.3.70	RNA.regulation of transcription.Silencing Group	pgsc0003dmp400053359	moderately similar to ( 268) AT5G38110 | Symbols: SGA1, SGA01, ASF1B | ASF1B (ANTI- SILENCING FUNCTION 1B) | chr5:15208643-15210064 FORWARDmoderately similar to ( 269) loc_os05g48030 12005.m27955 protein anti-silencing protein 1, putative, expressedAnti-silence COG5137 PGSC0003DMT400078736	GO:0005634;GO:0005737
CUST_17730_PI426222305	2.18703	1.56291	1.04213	2.58148	0.993328	2.09688	PGSC0003DMT400066939	C2H2 zinc-finger protein ZPT3-3	chr01	C2H2 zinc-finger protein ZPT3-3	PGSC0003DMP400045143	PGSC0003DMG400026020	PGSC0003DMC400045143	PGSC0003DMT400066939	27.3.11	RNA.regulation of transcription.C2H2 zinc finger family	pgsc0003dmp400045143	weakly similar to ( 161) AT3G60580 | Symbols: | zinc finger (C2H2 type) family protein | chr3:22394007-22394873 FORWARDweakly similar to ( 116) loc_os10g40660 12010.m06836 protein cys2/His2 zinc-finger transcription factor, putative, expressed PGSC0003DMT400066939	GO:0005634	GO:0003700;GO:0008270
CUST_41420_PI426222305	0.739692	1.3324	1.04841	2.41154	0.450305	2.64749	PGSC0003DMT400008042	Salt-tolerance protein	chr01	Salt-tolerance protein	PGSC0003DMP400005591	PGSC0003DMG400003109	PGSC0003DMC400005591	PGSC0003DMT400008042	27.3.7	RNA.regulation of transcription.C2C2(Zn) CO-like, Constans-like zinc finger family	pgsc0003dmp400005591	weakly similar to ( 190) AT4G38960 | Symbols: | zinc finger (B-box type) family protein | chr4:18162300-18163045 FORWARDweakly similar to ( 197) loc_os09g35880 12009.m06539 protein salt tolerance-like protein, putative, expressed PGSC0003DMT400008042
CUST_45008_PI426222305	1.24655	1.10045	0.779165	2.17015	0.450909	2.14228	PGSC0003DMT400022450	Something about silencing protein sas10	chr04	Something about silencing protein sas10	PGSC0003DMP400015295	PGSC0003DMG400008701	PGSC0003DMC400015295	PGSC0003DMT400022450	27.3.99	RNA.regulation of transcription.unclassified	pgsc0003dmp400015295	moderately similar to ( 211) AT1G07840 | Symbols: | leucine zipper factor-related | chr1:2424603-2426131 FORWARDmoderately similar to ( 211) loc_os01g68310 12001.m12933 protein expressed protein PGSC0003DMT400022450
CUST_36033_PI426222305	0.670289	0.47948	0.348603	2.06591	1.31622	2.26698	PGSC0003DMT400042790	Transcription factor	chr09	Transcription factor	PGSC0003DMP400029023	PGSC0003DMG400016608	PGSC0003DMC400029023	PGSC0003DMT400042790	27.3.6	RNA.regulation of transcription.bHLH,Basic Helix-Loop-Helix family	pgsc0003dmp400029023	moderately similar to ( 226) AT3G07340 | Symbols: | basic helix-loop-helix (bHLH) family protein | chr3:2341188-2343288 REVERSEmoderately similar to ( 203) loc_os01g68700 12001.m12972 protein BHLH transcription factor, putative, expressed PGSC0003DMT400042790		GO:0003674
CUST_46560_PI426222305	1.72819	1.81857	1.798	2.01775	1.10865	4.12033	PGSC0003DMT400071449	Auxin response factor	chr11	Auxin response factor	PGSC0003DMP400048339	PGSC0003DMG400027798	PGSC0003DMC400048339	PGSC0003DMT400071449	27.3.4	RNA.regulation of transcription.ARF, Auxin Response Factor family	pgsc0003dmp400048339	moderately similar to ( 319) AT1G77850 | Symbols: ARF17 | ARF17 (AUXIN RESPONSE FACTOR 17); transcription factor | chr1:29272405-29275193 FORWARDmoderately similar to ( 301) loc_os06g47150 12006.m091768 protein auxin response factor 16, putative, expressedAuxin_resp B3 PGSC0003DMT400071449
CUST_25890_PI426222305	1.60755	1.00071	1.59093	2.09228	1.57756	2.67521	PGSC0003DMT400051836	Methyl binding domain protein	chr06	Methyl binding domain protein	PGSC0003DMP400034906	PGSC0003DMG402020117	PGSC0003DMC400034906	PGSC0003DMT400051836	27.3.59	RNA.regulation of transcription.Methyl binding domain proteins	pgsc0003dmp400034906	weakly similar to ( 176) AT3G63030 | Symbols: MBD4 | MBD4; DNA binding / DNA demethylase/ methyl-CpG binding | chr3:23295394-23296425 FORWARDweakly similar to ( 148) loc_os05g33550 12005.m07587 protein methyl-binding domain protein MBD101, putative, expressed PGSC0003DMT400051836
CUST_32828_PI426222305	1.60064	1.92553	1.39567	2.91893	1.21243	4.39945	PGSC0003DMT400065147	Zinc finger (CCCH-type) protein	chr04	Zinc finger (CCCH-type) protein	PGSC0003DMP400043926	PGSC0003DMG402025318	PGSC0003DMC400043926	PGSC0003DMT400065147	27.3.99	RNA.regulation of transcription.unclassified	pgsc0003dmp400043926	very weakly similar to (80.5) AT1G21570 | Symbols: | zinc finger (CCCH-type) family protein | chr1:7557822-7560283 REVERSE PGSC0003DMT400065147		GO:0008270;GO:0003676
CUST_44488_PI426222305	1.53238	1.97892	1.44245	3.43892	1.20861	3.04026	PGSC0003DMT400019791	RNA binding protein	chr03	RNA binding protein	PGSC0003DMP400013533	PGSC0003DMG402007649	PGSC0003DMC400013533	PGSC0003DMT400019791	27.3.99	RNA.regulation of transcription.unclassified	pgsc0003dmp400013533	moderately similar to ( 207) AT3G02320 | Symbols: | RNA binding / tRNA (guanine-N2-)-methyltransferase | chr3:470097-473492 FORWARDweakly similar to ( 186) loc_os03g57280 12003.m10646 protein N-dimethylguanosine tRNA methyltransferase, putative, expressedTRM TRM1 PGSC0003DMT400019791		GO:0003723;GO:0004809
CUST_17435_PI426222305	1.52925	1.74691	1.24703	3.14266	1.13491	3.20709	PGSC0003DMT400001574	Pseudo-response regulator 5	chr03	Pseudo-response regulator 5	PGSC0003DMP400001176	PGSC0003DMG400000584	PGSC0003DMC400001176	PGSC0003DMT400001574	27.3.66	RNA.regulation of transcription.Psudo ARR transcription factor family	pgsc0003dmp400001176	moderately similar to ( 260) AT5G24470 | Symbols: APRR5, PRR5 | APRR5 (ARABIDOPSIS PSEUDO-RESPONSE REGULATOR 5); transcription regulator/ two-component response regulator | chr5:8356204-8358873 REVERSEmoderately similar to ( 283) PRR95_ORYSA Two-component response regulator-like PRR95 (Pseudo-response regulator 95) (OsPRR95) - Oryza sativa (Rice)moderately similar to ( 283) loc_os09g36220 12009.m…
CUST_6627_PI426222305	1.50189	1.01283	1.0265	3.74276	1.781	2.62891	PGSC0003DMT400014349	DNA binding protein	chr03	DNA binding protein	PGSC0003DMP400009905	PGSC0003DMG400005626	PGSC0003DMC400009905	PGSC0003DMT400014349	27.3.26	RNA.regulation of transcription.MYB-related transcription factor family	pgsc0003dmp400009905	weakly similar to ( 108) AT1G49010 | Symbols: | myb family transcription factor | chr1:18132714-18133778 FORWARD PGSC0003DMT400014349
CUST_19594_PI426222305	1.49715	1.16328	1.47555	2.40654	1.01573	3.45232	PGSC0003DMT400023274	WRKY transcription factor IIe-1	chr01	WRKY transcription factor IIe-1	PGSC0003DMP400015851	PGSC0003DMG400009014	PGSC0003DMC400015851	PGSC0003DMT400023274	27.3.32	RNA.regulation of transcription.WRKY domain transcription factor family	pgsc0003dmp400015851	weakly similar to ( 117) AT2G34830 | Symbols: WRKY35, MEE24, AtWRKY35 | WRKY35 (WRKY DNA-binding protein 35); transcription factor | chr2:14693839-14696378 REVERSEweakly similar to ( 116) loc_os02g47060 12002.m09741 protein OsWRKY66 - Superfamily of rice TFs having WRKY and zinc finger domains, expressedWRKY PGSC0003DMT400023274		GO:0003700;GO:0043565
CUST_34119_PI426222305	1.46628	1.21763	1.75349	2.63093	1.83204	2.46949	PGSC0003DMT400019736	Phosphatidylinositol N-acetylglucosaminyltransferase	chr04	Phosphatidylinositol N-acetylglucosaminyltransferase	PGSC0003DMP400013495	PGSC0003DMG402007625	PGSC0003DMC400013495	PGSC0003DMT400019736	27.3.99	RNA.regulation of transcription.unclassified	pgsc0003dmp400013495	moderately similar to ( 451) AT3G57170 | Symbols: | N-acetylglucosaminyl transferase component family protein / Gpi1 family protein | chr3:21159620-21162259 REVERSEweakly similar to ( 120) loc_os05g22370 12005.m27768 protein N-acetylglucosaminyl transferase component, putative, expressedGpi1 PGSC0003DMT400019736
CUST_51798_PI426222305	1.45606	1.40132	1.03057	2.48129	1.22155	2.20879	PGSC0003DMT400034294	Zinc finger protein	chr03	Zinc finger protein	PGSC0003DMP400023326	PGSC0003DMG400013184	PGSC0003DMC400023326	PGSC0003DMT400034294	27.3.11	RNA.regulation of transcription.C2H2 zinc finger family	pgsc0003dmp400023326	highly similar to ( 590) AT1G74770 | Symbols: | protein binding / zinc ion binding | chr1:28089695-28094834 REVERSEmoderately similar to ( 248) loc_os01g49470 12001.m11133 protein CHY zinc finger family protein, expressed PGSC0003DMT400034294
CUST_23405_PI426222305	1.43379	1.70116	1.70599	2.16466	1.61998	2.46327	PGSC0003DMT400073782	Transcription regulator	chr11	Transcription regulator	PGSC0003DMP400049942	PGSC0003DMG400028664	PGSC0003DMC400049942	PGSC0003DMT400073782	27.3.67	RNA.regulation of transcription.putative transcription regulator	pgsc0003dmp400049942	moderately similar to ( 429) AT2G13690 | Symbols: | PRLI-interacting factor, putative | chr2:5706704-5708895 REVERSEmoderately similar to ( 351) loc_os07g15600 12007.m06004 protein transcription regulator, putative, expressed PGSC0003DMT400073782
CUST_9627_PI426222305	1.41165	1.17333	1.24368	2.70311	1.34241	3.70747	PGSC0003DMT400006799	Auxin-responsive protein IAA1	chr03	Auxin-responsive protein IAA1	PGSC0003DMP400004725	PGSC0003DMG402002635	PGSC0003DMC400004725	PGSC0003DMT400006799	27.3.40	RNA.regulation of transcription.Aux/IAA family	pgsc0003dmp400004725	weakly similar to ( 177) AT1G04250 | Symbols: AXR3, IAA17 | AXR3 (AUXIN RESISTANT 3); transcription factor | chr1:1136382-1138340 FORWARDweakly similar to ( 174) IAA30_ORYSA Auxin-responsive protein IAA30 (Indoleacetic acid-induced protein 30) - Oryza sativa (Rice)weakly similar to ( 174) loc_os12g40890 12012.m07872 protein OsIAA30 - Auxin-responsive Aux/IAA gene family member, expressedAUX_IAA P…	GO:0005634
CUST_20848_PI426222305	1.40837	1.17333	1.03773	2.14675	1.46362	2.21789	PGSC0003DMT400011839	GRAS family transcription factor	chr12	GRAS family transcription factor	PGSC0003DMP400008227	PGSC0003DMG400004649	PGSC0003DMC400008227	PGSC0003DMT400011839	27.3.21	RNA.regulation of transcription.GRAS transcription factor family	pgsc0003dmp400008227	highly similar to ( 622) AT1G50420 | Symbols: SCL3, SCL-3 | SCL3; transcription factor | chr1:18678177-18679625 REVERSEmoderately similar to ( 213) DWRF8_MAIZE DELLA protein DWARF8 (Protein dwarf-8) - Zea mays (Maize)moderately similar to ( 404) loc_os01g71970 12001.m13235 protein GRAS family transcription factor containing protein, expressedGRAS PGSC0003DMT400011839	GO:0005634	GO:0003700;GO:0003677
CUST_30396_PI426222305	1.40333	1.17333	1.3003	2.93436	1.48965	2.42164	PGSC0003DMT400069925	Zinc ion binding protein	chr05	Zinc ion binding protein	PGSC0003DMP400047255	PGSC0003DMG400027192	PGSC0003DMC400047255	PGSC0003DMT400069925	27.3.99	RNA.regulation of transcription.unclassified	pgsc0003dmp400047255	moderately similar to ( 396) AT2G39830 | Symbols: DAR2 | DAR2 (DA1-RELATED PROTEIN 2); zinc ion binding | chr2:16619950-16623658 REVERSEmoderately similar to ( 333) loc_os03g16090 12003.m101288 protein zinc ion binding protein, putative, expressed PGSC0003DMT400069925
CUST_38637_PI426222305	1.39775	1.54293	1.77507	2.46664	1.09847	2.46066	PGSC0003DMT400076199	Nucleic acid binding	chr09	Nucleic acid binding	PGSC0003DMP400051603	PGSC0003DMG400029627	PGSC0003DMC400051603	PGSC0003DMT400076199	27.3.67	RNA.regulation of transcription.putative transcription regulator	pgsc0003dmp400051603	weakly similar to ( 113) AT3G07030 | Symbols: | nucleic acid binding | chr3:2223001-2225254 REVERSEweakly similar to ( 108) loc_os03g06980 12003.m06215 protein TATA-binding protein-associated factor 2N, putative, expressed PGSC0003DMT400076199
CUST_41893_PI426222305	1.39011	1.22259	1.1756	3.76083	1.11581	2.12366	PGSC0003DMT400026419	MYB transcription factor	chr02	MYB transcription factor	PGSC0003DMP400018036	PGSC0003DMG400010194	PGSC0003DMC400018036	PGSC0003DMT400026419	27.3.20	RNA.regulation of transcription.G2-like transcription factor family, GARP	pgsc0003dmp400018036	weakly similar to ( 119) AT2G38300 | Symbols: | DNA binding / transcription factor | chr2:16044175-16045679 REVERSEweakly similar to ( 133) loc_os12g01490 12012.m04153 protein DNA binding protein, putative, expressed PGSC0003DMT400026419		GO:0003677;GO:0003682
CUST_43123_PI426222305	1.35871	1.82372	1.63768	3.46528	1.94206	2.13886	PGSC0003DMT400028366	DNA binding protein		DNA binding protein	PGSC0003DMP400019310	PGSC0003DMG400010931	PGSC0003DMC400019310	PGSC0003DMT400028366	27.3.50	RNA.regulation of transcription.General Transcription	pgsc0003dmp400019310	weakly similar to ( 101) AT5G09380 | Symbols: | DNA-directed RNA polymerase III RPC4 family protein | chr5:2911313-2913136 REVERSE PGSC0003DMT400028366
CUST_14308_PI426222305	1.34785	1.64825	1.82005	2.56466	1.27608	2.09475	PGSC0003DMT400060223	Zinc finger protein	chr05	Zinc finger protein	PGSC0003DMP400040521	PGSC0003DMG400023427	PGSC0003DMC400040521	PGSC0003DMT400060223	27.3.99	RNA.regulation of transcription.unclassified	pgsc0003dmp400040521	moderately similar to ( 490) AT1G55460 | Symbols: | Kin17 DNA-binding protein-related | chr1:20707567-20708802 FORWARDmoderately similar to ( 455) loc_os03g37330 12003.m08840 protein antigenic determinant of rec-A protein, putative, expressed PGSC0003DMT400060223
CUST_18725_PI426222305	1.34674	1.45078	1.70849	3.42685	1.79837	2.22707	PGSC0003DMT400019100	Transcription factor	chr11	MYB-CC type transfactor	PGSC0003DMP400013099	PGSC0003DMG400007401	PGSC0003DMC400013099	PGSC0003DMT400019100	27.3.20	RNA.regulation of transcription.G2-like transcription factor family, GARP	pgsc0003dmp400013099	weakly similar to ( 136) AT2G01060 | Symbols: | myb family transcription factor | chr2:73456-74902 REVERSEweakly similar to ( 145) loc_os09g12770 12009.m059954 protein MYB-CC type transfactor, putative, expressed PGSC0003DMT400019100		GO:0003677
CUST_21270_PI426222305	1.3447	1.7539	1.25107	2.5845	1.64065	3.31872	PGSC0003DMT400020195	6b-interacting protein 1	chr12	6b-interacting protein 1	PGSC0003DMP400013760	PGSC0003DMG400007806	PGSC0003DMC400013760	PGSC0003DMT400020195	27.3.30	RNA.regulation of transcription.Trihelix, Triple-Helix transcription factor family	pgsc0003dmp400013760	weakly similar to ( 142) AT3G58630 | Symbols: | transcription factor | chr3:21683928-21685771 REVERSEweakly similar to ( 112) loc_os05g48690 12005.m83935 protein 6b-interacting protein 1, putative, expressed PGSC0003DMT400020195
CUST_23968_PI426222305	1.33729	1.86408	1.2465	3.68751	1.38006	2.35784	PGSC0003DMT400083773	GATA transcription factor	chr01	GATA transcription factor	PGSC0003DMP400056067	PGSC0003DMG400033576	PGSC0003DMC400056067	PGSC0003DMT400083773	27.3.9	RNA.regulation of transcription.C2C2(Zn) GATA transcription factor family	pgsc0003dmp400056067	moderately similar to ( 224) AT3G21175 | Symbols: ZML1 | ZML1 (ZIM-LIKE 1); transcription factor | chr3:7422832-7423765 FORWARDmoderately similar to ( 204) loc_os06g48534 12006.m91852 protein GATA transcription factor 25, putative, expressed PGSC0003DMT400083773	GO:0005634	GO:0005515;GO:0003700;GO:0008270;GO:0043565
CUST_50368_PI426222305	1.33699	1.32707	1.33787	2.14102	1.3438	2.48773	PGSC0003DMT400080676	Conserved gene of unknown function	chr08	Conserved gene of unknown function	PGSC0003DMP400054710	PGSC0003DMG400031419	PGSC0003DMC400054710	PGSC0003DMT400080676	27.3.30	RNA.regulation of transcription.Trihelix, Triple-Helix transcription factor family	pgsc0003dmp400054710	weakly similar to ( 108) AT1G76890 | Symbols: GT2, AT-GT2 | GT2; transcription factor | chr1:28873211-28875203 REVERSEweakly similar to ( 103) loc_os02g01380 12002.m77761 protein expressed protein PGSC0003DMT400080676
CUST_32094_PI426222305	1.33303	1.17333	1.03773	2.25754	1.01476	2.39024	PGSC0003DMT400059824	Zinc finger protein	chr10	Zinc finger protein	PGSC0003DMP400040244	PGSC0003DMG400023267	PGSC0003DMC400040244	PGSC0003DMT400059824	27.3.11	RNA.regulation of transcription.C2H2 zinc finger family	pgsc0003dmp400040244	very weakly similar to (94.4) loc_os12g39220 12012.m07707 protein zinc finger protein 7, putative, expressed PGSC0003DMT400059824		GO:0008270
CUST_20833_PI426222305	1.33302	1.3809	1.00926	3.15984	1.09553	3.58562	PGSC0003DMT400011598	Transcription factor	chr12	Transcription factor	PGSC0003DMP400008052	PGSC0003DMG400004567	PGSC0003DMC400008052	PGSC0003DMT400011598	27.3.20	RNA.regulation of transcription.G2-like transcription factor family, GARP	pgsc0003dmp400008052	moderately similar to ( 266) AT4G13640 | Symbols: UNE16 | UNE16 (unfertilized embryo sac 16); transcription factor | chr4:7936864-7938497 REVERSEmoderately similar to ( 202) loc_os06g45410 12006.m09069 protein myb family transcription factor-related protein, putative, expressed PGSC0003DMT400011598	GO:0005634	GO:0003700;GO:0003677;GO:0003682
CUST_10011_PI426222305	1.3178	1.38288	1.03773	2.11606	1.0928	2.30753	PGSC0003DMT400028148	Aspartic proteinase nepenthesin-1	chr08	Aspartic proteinase nepenthesin-1	PGSC0003DMP400019184	PGSC0003DMG400010857	PGSC0003DMC400019184	PGSC0003DMT400028148	27.3.99	RNA.regulation of transcription.unclassified	pgsc0003dmp400019184	moderately similar to ( 367) AT3G50050 | Symbols: | aspartyl protease family protein | chr3:18554138-18557115 REVERSEmoderately similar to ( 415) loc_os07g40260 12007.m29392 protein pepsin A, putative, expressed PGSC0003DMT400028148	GO:0044464	GO:0004190
CUST_40364_PI426222305	1.3123	1.71653	1.49639	2.80668	1.21693	2.00994	PGSC0003DMT400070984	Two-component response regulator ARR20		Two-component response regulator ARR20	PGSC0003DMP400048005	PGSC0003DMG400027610	PGSC0003DMC400048005	PGSC0003DMT400070984	27.3.5	RNA.regulation of transcription.ARR	pgsc0003dmp400048005	very weakly similar to (87.4) AT3G62670 | Symbols: ARR20, MEE41 | ARR20 (ARABIDOPSIS RESPONSE REGULATOR 20); transcription factor/ two-component response regulator | chr3:23176556-23178294 REVERSEvery weakly similar to (87.4) loc_os01g67770 12001.m12881 protein two-component response regulator ARR11, putative, expressed PGSC0003DMT400070984		GO:0003677;GO:0003682;GO:0000156
CUST_38225_PI426222305	1.30743	1.36797	1.11709	3.71882	1.22292	2.53901	PGSC0003DMT400067385	MADS-box protein	chr07	MADS-box protein	PGSC0003DMP400045466	PGSC0003DMG401026197	PGSC0003DMC400045466	PGSC0003DMT400067385	27.3.24	RNA.regulation of transcription.MADS box transcription factor family	pgsc0003dmp400045466	very weakly similar to (92.4) loc_os08g38590 12008.m07843 protein SRF-type transcription factor family protein, expressed PGSC0003DMT400067385	GO:0005634	GO:0003700;GO:0003677;GO:0046983
CUST_19635_PI426222305	1.3031	1.17333	1.13892	2.98965	1.08552	2.33949	PGSC0003DMT400002874	Cysteine desulfurylase	chr01	Cysteine desulfurylase	PGSC0003DMP400002081	PGSC0003DMG400001121	PGSC0003DMC400002081	PGSC0003DMT400002874	27.3.99	RNA.regulation of transcription.unclassified	pgsc0003dmp400002081	highly similar to ( 603) AT3G62130 | Symbols: | epimerase-related | chr3:23004994-23006358 FORWARDhighly similar to ( 545) loc_os01g18640 12001.m42973 protein isopenicillin N epimerase, putative, expressedcsdA Aminotran_5 PGSC0003DMT400002874	GO:0005829	GO:0030170;GO:0080146;GO:0045439
CUST_48938_PI426222305	1.29688	1.31401	1.04289	2.92616	1.09839	3.02071	PGSC0003DMT400065272	Dof domain, zinc finger family protein	chr11	Dof domain, zinc finger family protein	PGSC0003DMP400044012	PGSC0003DMG400025372	PGSC0003DMC400044012	PGSC0003DMT400065272	27.3.8	RNA.regulation of transcription.C2C2(Zn) DOF zinc finger family	pgsc0003dmp400044012	weakly similar to ( 131) AT5G60200 | Symbols: | Dof-type zinc finger domain-containing protein | chr5:24241078-24241951 FORWARDweakly similar to ( 119) PBF_MAIZE Dof zinc finger protein PBF (Prolamin box-binding factor) - Zea mays (Maize)weakly similar to ( 129) loc_os02g47810 12002.m09815 protein dof domain, zinc finger family protein, expressedzf-Dof PGSC0003DMT400065272		GO:0003677;GO:0008270
CUST_47947_PI426222305	1.28292	1.31442	1.0283	2.69056	1.03428	2.90318	PGSC0003DMT400097532	DNA binding protein	chr04	DNA binding protein	PGSC0003DMP400069207	PGSC0003DMG400047103	PGSC0003DMC400069207	PGSC0003DMT400097532	27.3.63	RNA.regulation of transcription.PHD finger transcription factor	pgsc0003dmp400069207	weakly similar to ( 119) AT5G59830 | Symbols: | unknown protein | chr5:24105423-24107071 FORWARD PGSC0003DMT400097532
CUST_31743_PI426222305	1.27752	1.31035	1.03773	3.09201	1.50042	2.96851	PGSC0003DMT400082373	Transcription factor	chr11	Transcription factor	PGSC0003DMP400055539	PGSC0003DMG402032501	PGSC0003DMC400055539	PGSC0003DMT400082373	27.3.60	RNA.regulation of transcription.NIN-like bZIP-related family	pgsc0003dmp400055539	weakly similar to ( 142) AT4G24020 | Symbols: NLP7 | NLP7 (NIN LIKE PROTEIN 7); transcription factor | chr4:12479904-12483822 FORWARDweakly similar to ( 122) loc_os03g03900 12003.m05922 protein nodule inception protein, putative, expressed PGSC0003DMT400082373		GO:0005515
CUST_29511_PI426222305	1.27419	1.37892	1.03773	3.98432	1.53675	2.56775	PGSC0003DMT400080556	Nucleic acid binding protein	chr04	Nucleic acid binding protein	PGSC0003DMP400054636	PGSC0003DMG400031371	PGSC0003DMC400054636	PGSC0003DMT400080556	27.3.73	RNA.regulation of transcription.Zn-finger(CCHC)	pgsc0003dmp400054636	weakly similar to ( 195) AT3G02820 | Symbols: | zinc knuckle (CCHC-type) family protein | chr3:611573-613294 FORWARDweakly similar to ( 162) loc_os02g52460 12002.m10277 protein nucleic acid binding protein, putative, expressedSwi3 PGSC0003DMT400080556
CUST_24075_PI426222305	1.26765	1.81144	1.29945	4.42674	1.76303	4.01588	PGSC0003DMT400083739	MADS transcriptional factor	chr01	MADS transcriptional factor	PGSC0003DMP400056040	PGSC0003DMG400033570	PGSC0003DMC400056040	PGSC0003DMT400083739	27.3.24	RNA.regulation of transcription.MADS box transcription factor family	pgsc0003dmp400056040	weakly similar to ( 147) AT2G22540 | Symbols: SVP, AGL22 | SVP (SHORT VEGETATIVE PHASE); transcription factor/ translation repressor, nucleic acid binding | chr2:9580417-9583603 FORWARDweakly similar to ( 132) MAD47_ORYSA MADS-box transcription factor 47 (OsMADS47) - Oryza sativa (Rice)weakly similar to ( 131) loc_os03g08754 12003.m35564 protein MADS-box transcription factor 47, putative, express…	GO:0005634	GO:0003700;GO:0003677;GO:0046983
CUST_5825_PI426222305	1.26618	1.08683	1.20606	2.21106	1.41859	4.32752	PGSC0003DMT400006920	Heat stress transcription factor A3	chr09	Heat stress transcription factor A3	PGSC0003DMP400004804	PGSC0003DMG401002683	PGSC0003DMC400004804	PGSC0003DMT400006920	27.3.23	RNA.regulation of transcription.HSF,Heat-shock transcription factor family	pgsc0003dmp400004804	weakly similar to ( 128) AT5G03720 | Symbols: AT-HSFA3, HSFA3 | AT-HSFA3; DNA binding / transcription factor | chr5:971913-973683 REVERSEweakly similar to ( 130) loc_os02g32590 12002.m33703 protein heat shock factor protein 2, putative, expressed PGSC0003DMT400006920
CUST_9984_PI426222305	1.2599	1.42645	1.26209	2.78276	1.00947	2.95815	PGSC0003DMT400097491	Type I MADS box transcription factor	chr06	Type I MADS box transcription factor	PGSC0003DMP400069166	PGSC0003DMG400047062	PGSC0003DMC400069166	PGSC0003DMT400097491	27.3.24	RNA.regulation of transcription.MADS box transcription factor family	pgsc0003dmp400069166	PGSC0003DMT400097491	GO:0005634	GO:0003700;GO:0003677;GO:0046983
CUST_33793_PI426222305	1.25967	1.15292	1.11891	2.22751	1.2249	2.33581	PGSC0003DMT400051513	GmMYB29A2 protein	chr06	GmMYB29A2 protein	PGSC0003DMP400034715	PGSC0003DMG400020013	PGSC0003DMC400034715	PGSC0003DMT400051513	27.3.25	RNA.regulation of transcription.MYB domain transcription factor family	pgsc0003dmp400034715	weakly similar to ( 153) AT3G23250 | Symbols: MYB15, ATY19, ATMYB15 | MYB15 (MYB DOMAIN PROTEIN 15); DNA binding / transcription factor | chr3:8309742-8310624 FORWARDweakly similar to ( 151) MYB4_ORYSA Myb-related protein Myb4 (OsMyb4) (Transcription factor RLTR1) - Oryza sativa (Rice)weakly similar to ( 156) loc_os10g33810 12010.m06210 protein myb-related protein Myb4, putative, expressed PGSC00…
CUST_13929_PI426222305	1.25407	1.70759	1.21141	3.00296	1.08	3.21874	PGSC0003DMT400096849	Pentatricopeptide repeat-containing protein	chr09	Pentatricopeptide repeat-containing protein	PGSC0003DMP400068524	PGSC0003DMG400046420	PGSC0003DMC400068524	PGSC0003DMT400096849	27.3.25	RNA.regulation of transcription.MYB domain transcription factor family	pgsc0003dmp400068524	moderately similar to ( 457) AT5G42450 | Symbols: | pentatricopeptide (PPR) repeat-containing protein | chr5:16977660-16978850 FORWARDvery weakly similar to (97.8) RF1_ORYSA Rf1 protein, mitochondrial precursor (PPR protein) (Fertility restorer) (Restorer for CMS) - Oryza sativa (Rice)highly similar to ( 526) loc_os01g62220 12001.m12345 protein tetratricopeptide-like helical, putative PGSC0003DMT…
CUST_15806_PI426222305	1.25118	1.53193	1.04528	3.13333	1.17106	3.3514	PGSC0003DMT400076396	F-box family protein	chr02	Zinc finger protein	PGSC0003DMP400051749	PGSC0003DMG400029708	PGSC0003DMC400051749	PGSC0003DMT400076396	27.3.8	RNA.regulation of transcription.C2C2(Zn) DOF zinc finger family	pgsc0003dmp400051749	weakly similar to ( 117) AT5G60200 | Symbols: | Dof-type zinc finger domain-containing protein | chr5:24241078-24241951 FORWARDweakly similar to ( 111) PBF_MAIZE Dof zinc finger protein PBF (Prolamin box-binding factor) - Zea mays (Maize)weakly similar to ( 115) loc_os02g47810 12002.m09815 protein dof domain, zinc finger family protein, expressedzf-Dof PGSC0003DMT400076396
CUST_25400_PI426222305	1.24757	1.35806	1.13653	6.33802	1.16898	3.85074	PGSC0003DMT400034618	ARF GTPase activator	chr11	ARF GTPase activator	PGSC0003DMP400023534	PGSC0003DMG401013304	PGSC0003DMC400023534	PGSC0003DMT400034618	27.3.11	RNA.regulation of transcription.C2H2 zinc finger family	pgsc0003dmp400023534	moderately similar to ( 223) AT5G47710 | Symbols: | C2 domain-containing protein | chr5:19330470-19331178 FORWARDweakly similar to ( 158) loc_os09g07800 12009.m04049 protein GTPase activating protein, putative, expressedC2 PGSC0003DMT400034618
CUST_2157_PI426222305	1.24444	1.51844	1.29339	2.12631	1.06616	2.43317	PGSC0003DMT400072260	BZIP domain class transcription factor	chr10	BZIP domain class transcription factor	PGSC0003DMP400048856	PGSC0003DMG400028121	PGSC0003DMC400048856	PGSC0003DMT400072260	27.3.35	RNA.regulation of transcription.bZIP transcription factor family	pgsc0003dmp400048856	moderately similar to ( 246) AT3G56850 | Symbols: AREB3, DPBF3 | AREB3 (ABA-RESPONSIVE ELEMENT BINDING PROTEIN 3); DNA binding / transcription activator/ transcription factor | chr3:21046554-21047894 REVERSEmoderately similar to ( 230) loc_os05g41070 12005.m08283 protein bZIP transcription factor, putative, expressed PGSC0003DMT400072260	GO:0005634	GO:0003700;GO:0046983;GO:0043565
CUST_17689_PI426222305	1.24338	1.74488	1.02391	2.99431	1.09409	2.87532	PGSC0003DMT400066988	MTERF family protein	chr01	MTERF family protein	PGSC0003DMP400045174	PGSC0003DMG400026040	PGSC0003DMC400045174	PGSC0003DMT400066988	27.3.99	RNA.regulation of transcription.unclassified	pgsc0003dmp400045174	moderately similar to ( 490) AT3G60400 | Symbols: | mitochondrial transcription termination factor-related / mTERF-related | chr3:22329093-22330769 FORWARDmoderately similar to ( 305) loc_os07g22670 12007.m06551 protein mTERF family protein, expressed PGSC0003DMT400066988	GO:0005739	GO:0003674
CUST_44461_PI426222305	1.24034	1.65408	1.13607	2.93391	1.30472	2.81307	PGSC0003DMT400019789	N(2),N(2)-dimethylguanosine tRNA methyltransferase 1	chr03	N(2),N(2)-dimethylguanosine tRNA methyltransferase 1	PGSC0003DMP400013532	PGSC0003DMG401007649	PGSC0003DMC400013532	PGSC0003DMT400019789	27.3.99	RNA.regulation of transcription.unclassified	pgsc0003dmp400013532	moderately similar to ( 366) AT5G15810 | Symbols: | N2,N2-dimethylguanosine tRNA methyltransferase family protein | chr5:5157798-5161121 FORWARDmoderately similar to ( 331) loc_os03g57280 12003.m10646 protein N-dimethylguanosine tRNA methyltransferase, putative, expressedTRM TRM1 PRK04338 PGSC0003DMT400019789		GO:0003723;GO:0004809
CUST_43090_PI426222305	1.23382	1.71056	1.34026	2.67329	1.58382	2.45445	PGSC0003DMT400045731	Myb-transcription factor	chr02	Myb-transcription factor	PGSC0003DMP400030988	PGSC0003DMG402017733	PGSC0003DMC400030988	PGSC0003DMT400045731	27.3.50	RNA.regulation of transcription.General Transcription	pgsc0003dmp400030988	weakly similar to ( 156) AT4G39160 | Symbols: | DNA binding / transcription factor | chr4:18236828-18239744 FORWARDvery weakly similar to (98.2) loc_os03g62379 12003.m11114 protein DNA binding protein, putative, expressed PGSC0003DMT400045731
CUST_12691_PI426222305	1.22398	1.21687	1.25342	2.64381	1.02016	2.29987	PGSC0003DMT400063313	MADS box protein	chr03	MADS box protein	PGSC0003DMP400042629	PGSC0003DMG400024625	PGSC0003DMC400042629	PGSC0003DMT400063313	27.3.24	RNA.regulation of transcription.MADS box transcription factor family	pgsc0003dmp400042629	moderately similar to ( 260) AT5G60910 | Symbols: AGL8, FUL | AGL8 (agamous-like 8); transcription factor | chr5:24502736-24504934 REVERSEmoderately similar to ( 329) AGL8_SOLTU Agamous-like MADS-box protein AGL8 homolog (POTM1-1) - Solanum tuberosum (Potato)moderately similar to ( 222) loc_os03g54160 12003.m35583 protein MADS-box transcription factor 14, putative, expressedMADS_MEF2_like MADS MA…
CUST_8249_PI426222305	1.20942	1.73317	1.52066	3.25222	1.90352	2.22515	PGSC0003DMT400075370	DNA binding protein	chr12	DNA binding protein	PGSC0003DMP400051038	PGSC0003DMG401029312	PGSC0003DMC400051038	PGSC0003DMT400075370	27.3.67	RNA.regulation of transcription.putative transcription regulator	pgsc0003dmp400051038	weakly similar to ( 174) AT2G33620 | Symbols: | DNA-binding family protein / AT-hook protein 1 (AHP1) | chr2:14234749-14236563 FORWARDweakly similar to ( 182) loc_os08g40150 12008.m26527 protein AT-hook protein 1, putative, expressedDUF296 PGSC0003DMT400075370	GO:0044424	GO:0003677
CUST_41922_PI426222305	1.20818	1.17086	1.1176	3.50403	1.05124	2.77879	PGSC0003DMT400026418	MYB transcription factor	chr02	MYB transcription factor	PGSC0003DMP400018035	PGSC0003DMG400010194	PGSC0003DMC400018035	PGSC0003DMT400026418	27.3.20	RNA.regulation of transcription.G2-like transcription factor family, GARP	pgsc0003dmp400018035	weakly similar to ( 118) AT2G38300 | Symbols: | DNA binding / transcription factor | chr2:16044175-16045679 REVERSEweakly similar to ( 130) loc_os06g35140 12006.m08051 protein myb-like DNA-binding domain, SHAQKYF class family protein, expressed PGSC0003DMT400026418		GO:0003677
CUST_10234_PI426222305	1.20686	1.52076	1.03773	2.62117	1.11722	2.13622	PGSC0003DMT400028984	Set domain protein	chr07	Set domain protein	PGSC0003DMP400019708	PGSC0003DMG401011157	PGSC0003DMC400019708	PGSC0003DMT400028984	27.3.69	RNA.regulation of transcription.SET-domain transcriptional regulator family	pgsc0003dmp400019708	weakly similar to ( 173) AT4G30860 | Symbols: ASHR3, SDG4 | SDG4 (SET DOMAIN GROUP 4); histone methyltransferase | chr4:15024546-15027427 FORWARD PGSC0003DMT400028984	GO:0005634;GO:0000785	GO:0008270;GO:0018024
CUST_44716_PI426222305	1.20331	1.96047	1.4969	3.80661	1.25742	3.72476	PGSC0003DMT400045245	Conserved gene of unknown function	chr06	Conserved gene of unknown function	PGSC0003DMP400030658	PGSC0003DMG401017555	PGSC0003DMC400030658	PGSC0003DMT400045245	27.3.35	RNA.regulation of transcription.bZIP transcription factor family	pgsc0003dmp400030658	weakly similar to ( 112) AT1G21740 | Symbols: | unknown protein | chr1:7641580-7645078 FORWARDDUF630 DUF632 PGSC0003DMT400045245
CUST_18772_PI426222305	1.20298	1.59018	1.00499	6.45174	1.92712	3.77462	PGSC0003DMT400001195	Neuroendocrine differentiation factor	chr11	SNF7 family protein	PGSC0003DMP400000887	PGSC0003DMG400000449	PGSC0003DMC400000887	PGSC0003DMT400001195	27.3.71	RNA.regulation of transcription.SNF7	pgsc0003dmp400000887	very weakly similar to (91.3) AT3G45000 | Symbols: VPS24.2, VPS24 | VPS24.2 | chr3:16460707-16461407 FORWARDvery weakly similar to (92.0) loc_os07g29630 12007.m07235 protein charged multivesicular body protein 3, putative, expressed PGSC0003DMT400001195
CUST_47712_PI426222305	1.18898	1.20222	1.13687	3.61673	1.20939	2.31995	PGSC0003DMT400061284	DNA binding protein	chr12	DNA binding protein	PGSC0003DMP400041251	PGSC0003DMG400023852	PGSC0003DMC400041251	PGSC0003DMT400061284	27.3.6	RNA.regulation of transcription.bHLH,Basic Helix-Loop-Helix family	pgsc0003dmp400041251	weakly similar to ( 155) AT2G42280 | Symbols: | basic helix-loop-helix (bHLH) family protein | chr2:17611891-17613163 REVERSEweakly similar to ( 150) loc_os08g39630 12008.m26738 protein DNA binding protein, putative, expressed PGSC0003DMT400061284	GO:0005634	GO:0003700;GO:0003677;GO:0046983
CUST_39245_PI426222305	1.18676	1.58953	1.12708	2.38109	1.24218	2.66474	PGSC0003DMT400065088	Aspartic proteinase nepenthesin-1	chr04	Aspartic proteinase nepenthesin-1	PGSC0003DMP400043885	PGSC0003DMG400025293	PGSC0003DMC400043885	PGSC0003DMT400065088	27.3.99	RNA.regulation of transcription.unclassified	pgsc0003dmp400043885	highly similar to ( 531) AT3G20015 | Symbols: | aspartic-type endopeptidase | chr3:6978746-6980158 REVERSEmoderately similar to ( 358) loc_os04g58070 12004.m10689 protein aspartic proteinase nepenthesin-2 precursor, putative, expressedAsp PGSC0003DMT400065088
CUST_8960_PI426222305	1.18394	1.62642	1.03773	2.45352	1.30317	3.01199	PGSC0003DMT400058037	Zinc finger protein	chr03	Zinc finger protein	PGSC0003DMP400039062	PGSC0003DMG400022531	PGSC0003DMC400039062	PGSC0003DMT400058037	27.3.99	RNA.regulation of transcription.unclassified	pgsc0003dmp400039062	weakly similar to ( 176) AT5G37055 | Symbols: ATSWC6, SEF | SEF (SERRATED LEAVES AND EARLY FLOWERING) | chr5:14641634-14642387 REVERSEweakly similar to ( 157) loc_os03g25260 12003.m07868 protein zinc finger HIT domain-containing protein 1, putative, expressed PGSC0003DMT400058037
CUST_41269_PI426222305	1.18265	1.50807	1.31047	2.50375	1.00187	2.85792	PGSC0003DMT400074246	DNA binding protein	chr03	DNA binding protein	PGSC0003DMP400050272	PGSC0003DMG400028852	PGSC0003DMC400050272	PGSC0003DMT400074246	27.3.67	RNA.regulation of transcription.putative transcription regulator	pgsc0003dmp400050272	highly similar to ( 968) AT3G43240 | Symbols: | ARID/BRIGHT DNA-binding domain-containing protein | chr3:15210032-15214440 REVERSEhighly similar to ( 905) loc_os09g26390 12009.m059981 protein DNA binding protein, putative, expressed PGSC0003DMT400074246
CUST_41416_PI426222305	1.18075	1.62925	1.04167	3.74227	1.69735	4.69463	PGSC0003DMT400008075	Chloroplast methionine sulfoxide reductase B2	chr01	Chloroplast methionine sulfoxide reductase B2	PGSC0003DMP400005616	PGSC0003DMG400003115	PGSC0003DMC400005616	PGSC0003DMT400008075	27.3.67	RNA.regulation of transcription.putative transcription regulator	pgsc0003dmp400005616	moderately similar to ( 216) AT4G21860 | Symbols: MSRB2 | MSRB2 (methionine sulfoxide reductase B 2); peptide-methionine-(S)-S-oxide reductase | chr4:11600282-11601507 REVERSEmoderately similar to ( 214) loc_os03g24600 12003.m35241 protein peptide methionine sulfoxide reductase msrB, putative, expressedSelR PRK05550 PRK05508 COG0229 PRK00222 PGSC0003DMT400008075
CUST_19181_PI426222305	1.17723	1.17333	1.03773	2.33025	1.05213	2.02572	PGSC0003DMT400072893	CRABS CLAW	chr05	CRABS CLAW	PGSC0003DMP400049315	PGSC0003DMG400028360	PGSC0003DMC400049315	PGSC0003DMT400072893	27.3.10	RNA.regulation of transcription.C2C2(Zn) YABBY family	pgsc0003dmp400049315	weakly similar to ( 177) AT1G69180 | Symbols: CRC | CRC (CRABS CLAW); transcription factor | chr1:26007734-26008940 REVERSEweakly similar to ( 166) YABDL_ORYSA Protein DROOPING LEAF - Oryza sativa (Rice)weakly similar to ( 166) loc_os03g11600 12003.m06612 protein protein DROOPING LEAF, putative, expressedYABBY PGSC0003DMT400072893
CUST_38290_PI426222305	1.17526	1.5524	1.22441	2.3586	1.06054	2.29607	PGSC0003DMT400067295	DNA binding protein	chr07	DNA binding protein	PGSC0003DMP400045405	PGSC0003DMG400026168	PGSC0003DMC400045405	PGSC0003DMT400067295	27.3.6	RNA.regulation of transcription.bHLH,Basic Helix-Loop-Helix family	pgsc0003dmp400045405	weakly similar to ( 101) AT5G54680 | Symbols: ILR3 | ILR3 (iaa-leucine resistant3); DNA binding / transcription factor | chr5:22217270-22218993 FORWARDvery weakly similar to (98.6) loc_os07g35870 12007.m28990 protein bHLH transcription factor, putative, expressed PGSC0003DMT400067295
CUST_42729_PI426222305	1.17446	1.68202	1.03993	2.40465	1.26741	2.81773	PGSC0003DMT400052336	Ribosomal RNA methyltransferase RrmJ/FtsJ	chr09	Ribosomal RNA methyltransferase	PGSC0003DMP400035277	PGSC0003DMG400020316	PGSC0003DMC400035277	PGSC0003DMT400052336	27.3.67	RNA.regulation of transcription.putative transcription regulator	pgsc0003dmp400035277	moderately similar to ( 289) AT5G01230 | Symbols: | FtsJ-like methyltransferase family protein | chr5:92789-95380 REVERSEmoderately similar to ( 284) loc_os06g49140 12006.m32178 protein ribosomal RNA methyltransferase 1, putative, expressedFtsJ FtsJ rrmJ PGSC0003DMT400052336
CUST_18878_PI426222305	1.1742	1.86419	1.50073	3.37897	1.56534	2.42632	PGSC0003DMT400019098	Transcription factor	chr11	MYB-CC type transfactor	PGSC0003DMP400013097	PGSC0003DMG400007401	PGSC0003DMC400013097	PGSC0003DMT400019098	27.3.20	RNA.regulation of transcription.G2-like transcription factor family, GARP	pgsc0003dmp400013097	weakly similar to ( 179) AT2G01060 | Symbols: | myb family transcription factor | chr2:73456-74902 REVERSEweakly similar to ( 185) loc_os09g12770 12009.m059954 protein MYB-CC type transfactor, putative, expressed PGSC0003DMT400019098		GO:0003677
CUST_29194_PI426222305	1.17117	1.17333	1.03773	2.1816	1.04588	2.23519	PGSC0003DMT400004764	TLD family protein	chr04	TLD family protein	PGSC0003DMP400003371	PGSC0003DMG400001887	PGSC0003DMC400003371	PGSC0003DMT400004764	27.3.99	RNA.regulation of transcription.unclassified	pgsc0003dmp400003371	very weakly similar to (83.6) AT4G39870 | Symbols: | FUNCTIONS IN: molecular_function unknown; INVOLVED IN: biological_process unknown; LOCATED IN: cellular_component unknown; EXPRESSED IN: 23 plant structures; EXPRESSED DURING: 15 growth stages; CONTAINS InterPro DOMAIN/s: TLDc (InterPro:IPR006571); BEST Arabidopsis thaliana protein match is: unknown protein (TAIR:AT2G05590.2); Has 2018 Blast hi…
CUST_16759_PI426222305	1.16357	1.19467	1.01882	2.21292	1.17067	2.50441	PGSC0003DMT400069680	DOF domain class transcription factor	chr06	DOF domain class transcription factor	PGSC0003DMP400047058	PGSC0003DMG400027089	PGSC0003DMC400047058	PGSC0003DMT400069680	27.3.8	RNA.regulation of transcription.C2C2(Zn) DOF zinc finger family	pgsc0003dmp400047058	weakly similar to ( 147) AT5G62940 | Symbols: | Dof-type zinc finger domain-containing protein | chr5:25257183-25258504 REVERSEweakly similar to ( 111) PBF_MAIZE Dof zinc finger protein PBF (Prolamin box-binding factor) - Zea mays (Maize)weakly similar to ( 158) loc_os02g47810 12002.m09815 protein dof domain, zinc finger family protein, expressedzf-Dof PGSC0003DMT400069680	GO:0005634	GO:0003700;GO:0003677;GO:0008270
CUST_37252_PI426222305	1.16086	1.91094	1.207	2.08526	1.17579	2.83322	PGSC0003DMT400068038	DNA binding protein	chr12	DNA binding protein	PGSC0003DMP400045956	PGSC0003DMG400026460	PGSC0003DMC400045956	PGSC0003DMT400068038	27.3.22	RNA.regulation of transcription.HB,Homeobox transcription factor family	pgsc0003dmp400045956	nearly identical (1067) AT1G52150 | Symbols: ATHB-15, ATHB15, CNA, ICU4 | ATHB-15; DNA binding / transcription factor | chr1:19410118-19413961 REVERSEhighly similar to ( 875) loc_os03g43930 12003.m09434 protein class III HD-Zip protein 4, putative, expressedSTART START START PGSC0003DMT400068038
CUST_31644_PI426222305	1.16026	1.01222	1.11932	2.01647	1.06104	2.05576	PGSC0003DMT400035125	Leafy cotyledon1	chr05	Leafy cotyledon1	PGSC0003DMP400023879	PGSC0003DMG401013505	PGSC0003DMC400023879	PGSC0003DMT400035125	27.3.15	RNA.regulation of transcription.CCAAT box binding factor family, HAP3	pgsc0003dmp400023879	weakly similar to ( 130) AT5G47670 | Symbols: NF-YB6 | NF-YB6 (NUCLEAR FACTOR Y, SUBUNIT B6); transcription activator/ transcription activator binding / transcription factor | chr5:19315358-19315975 FORWARDweakly similar to ( 110) NFYB3_ORYSA Nuclear transcription factor Y subunit B-3 (OsNF-YB-3) (Transcriptional activator HAP3B) - Oryza sativa (Rice)weakly similar to ( 126) loc_os02g49370 12002.…
CUST_5232_PI426222305	1.15189	1.80993	1.03773	3.00282	1.1473	3.10534	PGSC0003DMT400009328	COL domain class transcription factor	chr09	COL domain class transcription factor	PGSC0003DMP400006480	PGSC0003DMG400003625	PGSC0003DMC400006480	PGSC0003DMT400009328	27.3.7	RNA.regulation of transcription.C2C2(Zn) CO-like, Constans-like zinc finger family	pgsc0003dmp400006480	moderately similar to ( 206) AT4G38960 | Symbols: | zinc finger (B-box type) family protein | chr4:18162300-18163045 FORWARDmoderately similar to ( 226) loc_os09g35880 12009.m06539 protein salt tolerance-like protein, putative, expressed PGSC0003DMT400009328
CUST_42880_PI426222305	1.14957	1.17333	1.03773	2.20495	1.1173	2.1127	PGSC0003DMT400058426	GAMyb-like1	chr01	GAMyb-like1	PGSC0003DMP400039334	PGSC0003DMG400022689	PGSC0003DMC400039334	PGSC0003DMT400058426	27.3.25	RNA.regulation of transcription.MYB domain transcription factor family	pgsc0003dmp400039334	moderately similar to ( 230) AT3G11440 | Symbols: ATMYB65, MYB65 | MYB65 (MYB DOMAIN PROTEIN 65); DNA binding / transcription factor | chr3:3603056-3604929 FORWARDmoderately similar to ( 257) GAM1_ORYSA Transcription factor GAMYB (OsGAMyb) - Oryza sativa (Rice)moderately similar to ( 261) loc_os01g59660 12001.m42740 protein transcription factor GAMYB, putative, expressed PGSC0003DMT400058426
CUST_6348_PI426222305	1.14737	1.78317	1.11319	2.03926	1.30576	2.32028	PGSC0003DMT400036798	Conserved gene of unknown function	chr03	XH/XS domain-containing protein	PGSC0003DMP400024954	PGSC0003DMG402014189	PGSC0003DMC400024954	PGSC0003DMT400036798	27.3.67	RNA.regulation of transcription.putative transcription regulator	pgsc0003dmp400024954	very weakly similar to (90.1) AT1G15910 | Symbols: | XH/XS domain-containing protein / XS zinc finger domain-containing protein | chr1:5465951-5468723 FORWARDvery weakly similar to (84.0) loc_os01g03570 12001.m06995 protein transcription factor X1, putative, expressedXH PGSC0003DMT400036798
CUST_16539_PI426222305	1.14292	1.45245	1.02641	2.29029	1.00622	2.25238	PGSC0003DMT400069375	Pentatricopeptide repeat-containing protein	chr06	Pentatricopeptide repeat-containing protein	PGSC0003DMP400046836	PGSC0003DMG402026981	PGSC0003DMC400046836	PGSC0003DMT400069375	27.3.67	RNA.regulation of transcription.putative transcription regulator	pgsc0003dmp400046836	highly similar to ( 642) AT1G07590 | Symbols: | pentatricopeptide (PPR) repeat-containing protein | chr1:2336649-2338481 REVERSEhighly similar to ( 598) loc_os08g06500 12008.m04789 protein expressed protein PGSC0003DMT400069375
CUST_47856_PI426222305	1.14275	1.30597	1.19233	3.25551	1.1109	3.38474	PGSC0003DMT400019410	LOB domain-containing protein	chr06	LOB domain-containing protein	PGSC0003DMP400013288	PGSC0003DMG400007503	PGSC0003DMC400013288	PGSC0003DMT400019410	27.3.37	RNA.regulation of transcription.AS2,Lateral Organ Boundaries Gene Family	pgsc0003dmp400013288	weakly similar to ( 191) AT2G28500 | Symbols: LBD11 | LBD11 (LOB DOMAIN-CONTAINING PROTEIN 11) | chr2:12186603-12188110 REVERSEweakly similar to ( 186) loc_os03g17810 12003.m07206 protein LOB domain protein 11, putative, expressedDUF260 PGSC0003DMT400019410
CUST_7667_PI426222305	1.14143	1.59068	1.03614	2.98509	1.00972	3.34393	PGSC0003DMT400025680	Zinc finger protein	chr04	Zinc finger protein	PGSC0003DMP400017500	PGSC0003DMG400009915	PGSC0003DMC400017500	PGSC0003DMT400025680	27.3.99	RNA.regulation of transcription.unclassified	pgsc0003dmp400017500	highly similar to ( 558) AT2G33640 | Symbols: | zinc finger (DHHC type) family protein | chr2:14239500-14242240 FORWARDhighly similar to ( 658) loc_os04g49560 12004.m09889 protein metal ion binding protein, putative, expressedzf-DHHC COG5273 PGSC0003DMT400025680
CUST_1485_PI426222305	1.12911	1.48458	1.15328	3.63142	1.23416	2.75447	PGSC0003DMT400001285	Conserved gene of unknown function	chr02	Conserved gene of unknown function	PGSC0003DMP400000954	PGSC0003DMG400000489	PGSC0003DMC400000954	PGSC0003DMT400001285	27.3.68	RNA.regulation of transcription.PWWP domain protein	pgsc0003dmp400000954	weakly similar to ( 195) AT3G27860 | Symbols: | PWWP domain-containing protein | chr3:10326128-10328086 FORWARDweakly similar to ( 129) loc_os05g38810 12005.m08060 protein PWWP domain containing protein, expressed PGSC0003DMT400001285
CUST_32267_PI426222305	1.12745	1.51185	1.18931	2.6839	1.51393	2.6271	PGSC0003DMT400012591	Basic helix-loop-helix protein	chr04	Basic helix-loop-helix protein	PGSC0003DMP400008750	PGSC0003DMG400004922	PGSC0003DMC400008750	PGSC0003DMT400012591	27.3.6	RNA.regulation of transcription.bHLH,Basic Helix-Loop-Helix family	pgsc0003dmp400008750	weakly similar to ( 186) AT1G10120 | Symbols: | DNA binding / transcription factor | chr1:3304228-3305984 REVERSEweakly similar to ( 143) loc_os03g51910 12003.m10170 protein BHLH transcription factor, putative, expressed PGSC0003DMT400012591
CUST_40300_PI426222305	1.12372	1.94091	1.22431	4.07385	1.29957	3.1639	PGSC0003DMT400077821	Zinc finger protein	chr03	TRANSPARENT TESTA 1 protein	PGSC0003DMP400052697	PGSC0003DMG400030271	PGSC0003DMC400052697	PGSC0003DMT400077821	27.3.11	RNA.regulation of transcription.C2H2 zinc finger family	pgsc0003dmp400052697	moderately similar to ( 281) AT3G57670 | Symbols: NTT | NTT (NO TRANSMITTING TRACT); nucleic acid binding / transcription factor/ zinc ion binding | chr3:21370936-21373121 FORWARDmoderately similar to ( 255) loc_os06g40960 12006.m08631 protein zinc finger protein, putative, expressed PGSC0003DMT400077821
CUST_8760_PI426222305	1.12107	1.18064	1.63046	2.46516	1.46131	2.44881	PGSC0003DMT400053999	DNA binding protein	chr07	DNA binding protein	PGSC0003DMP400036369	PGSC0003DMG400020951	PGSC0003DMC400036369	PGSC0003DMT400053999	27.3.2	RNA.regulation of transcription.Alfin-like	pgsc0003dmp400036369	moderately similar to ( 232) AT5G20510 | Symbols: AL5 | AL5 (ALFIN-LIKE 5); DNA binding / methylated histone residue binding | chr5:6939991-6942846 REVERSEmoderately similar to ( 219) loc_os07g41740 12007.m08410 protein PHD finger protein, putative, expressed PGSC0003DMT400053999
CUST_15601_PI426222305	1.11973	1.14093	1.1244	2.48684	1.00797	3.4804	PGSC0003DMT400091467	Chromomethylase	chr09	Chromomethylase	PGSC0003DMP400063142	PGSC0003DMG400041038	PGSC0003DMC400063142	PGSC0003DMT400091467	27.3.46	RNA.regulation of transcription.DNA methyltransferases	pgsc0003dmp400063142	very weakly similar to (89.0) AT1G80740 | Symbols: CMT1, DMT4 | CMT1 (CHROMOMETHYLASE 1); DNA binding / chromatin binding | chr1:30342394-30346831 FORWARDvery weakly similar to (82.0) CMT3_MAIZE DNA (cytosine-5)-methyltransferase 3 (EC 2.1.1.37) (Chromomethylase 3) (DNA methyltransferase 105) - Zea mays (Maize) PGSC0003DMT400091467
CUST_4606_PI426222305	1.11963	1.95417	1.4902	2.54959	1.41508	2.97479	PGSC0003DMT400047735	Charged multivesicular body protein 4b	chr11	Charged multivesicular body protein 4b	PGSC0003DMP400032332	PGSC0003DMG400018556	PGSC0003DMC400032332	PGSC0003DMT400047735	27.3.71	RNA.regulation of transcription.SNF7	pgsc0003dmp400032332	moderately similar to ( 216) AT2G19830 | Symbols: SNF7.2, VPS32 | SNF7.2 | chr2:8558101-8559389 REVERSEweakly similar to ( 196) loc_os09g09480 12009.m059945 protein charged multivesicular body protein 4b, putative, expressedSnf7 PGSC0003DMT400047735
CUST_43766_PI426222305	1.11598	1.60794	1.04105	2.39231	1.02914	2.5595	PGSC0003DMT400040130	VIP2	chr11	VIP2	PGSC0003DMP400027211	PGSC0003DMG402015527	PGSC0003DMC400027211	PGSC0003DMT400040130	27.3.99	RNA.regulation of transcription.unclassified	pgsc0003dmp400027211	very weakly similar to (80.1) AT5G59710 | Symbols: VIP2, AtVIP2 | VIP2 (VIRE2 INTERACTING PROTEIN2); protein binding / transcription regulator | chr5:24058157-24061736 FORWARD PGSC0003DMT400040130
CUST_23305_PI426222305	1.11497	1.69364	1.47877	4.04216	1.37695	3.79187	PGSC0003DMT400010140	DNA binding protein	chr11	DNA binding protein	PGSC0003DMP400007073	PGSC0003DMG400003974	PGSC0003DMC400007073	PGSC0003DMT400010140	27.3.67	RNA.regulation of transcription.putative transcription regulator	pgsc0003dmp400007073	weakly similar to ( 161) AT5G55600 | Symbols: | agenet domain-containing protein / bromo-adjacent homology (BAH) domain-containing protein | chr5:22522232-22524796 REVERSEweakly similar to ( 134) loc_os07g41640 12007.m29252 protein DNA binding protein, putative, expressed PGSC0003DMT400010140
CUST_29115_PI426222305	1.1147	1.77117	1.1478	2.76445	1.92923	2.03924	PGSC0003DMT400020633	Conserved gene of unknown function	chr04	Conserved gene of unknown function	PGSC0003DMP400014053	PGSC0003DMG400007992	PGSC0003DMC400014053	PGSC0003DMT400020633	27.3.27	RNA.regulation of transcription.NAC domain transcription factor family	pgsc0003dmp400014053	moderately similar to ( 434) AT4G37080 | Symbols: | unknown protein | chr4:17474205-17476716 FORWARDmoderately similar to ( 374) loc_os09g28850 12009.m059921 protein expressed proteinDUF547 PGSC0003DMT400020633
CUST_7553_PI426222305	1.11213	1.31574	1.10729	4.68639	1.01765	2.8593	PGSC0003DMT400013174	Nucleic acid binding protein	chr04	Nucleic acid binding protein	PGSC0003DMP400009135	PGSC0003DMG400005147	PGSC0003DMC400009135	PGSC0003DMT400013174	27.3.11	RNA.regulation of transcription.C2H2 zinc finger family	pgsc0003dmp400009135	moderately similar to ( 324) AT1G03840 | Symbols: MGP | MGP (Magpie); nucleic acid binding / protein binding / transcription factor/ zinc ion binding | chr1:967596-970058 REVERSEmoderately similar to ( 317) loc_os01g14010 12001.m08007 protein zinc finger, C2H2 type family protein, expressed PGSC0003DMT400013174
CUST_2067_PI426222305	1.1102	1.15598	1.03783	2.24212	1.95368	2.71504	PGSC0003DMT400021625	DNA-binding protein 4	chr10	DNA-binding protein 4	PGSC0003DMP400014725	PGSC0003DMG400008391	PGSC0003DMC400014725	PGSC0003DMT400021625	27.3.32	RNA.regulation of transcription.WRKY domain transcription factor family	pgsc0003dmp400014725	weakly similar to ( 108) AT3G56400 | Symbols: WRKY70, ATWRKY70 | WRKY70; transcription factor/ transcription repressor | chr3:20909082-20910409 REVERSEweakly similar to ( 101) loc_os03g21710 12003.m07575 protein WRKY DNA binding domain containing protein, expressed PGSC0003DMT400021625		GO:0003700;GO:0043565
CUST_43774_PI426222305	1.10839	1.31619	1.15672	2.89603	1.06111	2.93859	PGSC0003DMT400040145	Methyl-CpG binding	chr11	Methyl binding domain protein	PGSC0003DMP400027221	PGSC0003DMG400015535	PGSC0003DMC400027221	PGSC0003DMT400040145	27.3.59	RNA.regulation of transcription.Methyl binding domain proteins	pgsc0003dmp400027221	PGSC0003DMT400040145
CUST_34664_PI426222305	1.10293	1.65167	1.21893	3.33839	1.22663	3.3323	PGSC0003DMT400001795	Phd finger transcription factor	chr07	Phd finger transcription factor	PGSC0003DMP400001326	PGSC0003DMG400000673	PGSC0003DMC400001326	PGSC0003DMT400001795	27.3.44	RNA.regulation of transcription.Chromatin Remodeling Factors	pgsc0003dmp400001326	moderately similar to ( 315) AT4G22140 | Symbols: | DNA binding / protein binding / zinc ion binding | chr4:11728093-11730230 REVERSEmoderately similar to ( 312) loc_os09g21770 12009.m05384 protein DNA binding protein, putative, expressedBAH_BAHCC1 BAH BAH PGSC0003DMT400001795
CUST_23959_PI426222305	1.0992	1.52932	1.59992	2.54785	1.96713	2.41135	PGSC0003DMT400083774	GATA transcription factor	chr01	GATA transcription factor	PGSC0003DMP400056068	PGSC0003DMG400033576	PGSC0003DMC400056068	PGSC0003DMT400083774	27.3.9	RNA.regulation of transcription.C2C2(Zn) GATA transcription factor family	pgsc0003dmp400056068	moderately similar to ( 212) AT3G21175 | Symbols: ZML1 | ZML1 (ZIM-LIKE 1); transcription factor | chr3:7422832-7423765 FORWARDweakly similar to ( 196) loc_os06g48534 12006.m91852 protein GATA transcription factor 25, putative, expressed PGSC0003DMT400083774		GO:0005515;GO:0003700;GO:0008270;GO:0043565
CUST_17031_PI426222305	1.09744	1.22719	1.03773	2.48263	1.06939	2.70192	PGSC0003DMT400018305	BZIP transcription factor	chr06	BZIP transcription factor	PGSC0003DMP400012604	PGSC0003DMG400007110	PGSC0003DMC400012604	PGSC0003DMT400018305	27.3.35	RNA.regulation of transcription.bZIP transcription factor family	pgsc0003dmp400012604	moderately similar to ( 372) AT1G08320 | Symbols: | bZIP family transcription factor | chr1:2622113-2627451 REVERSEmoderately similar to ( 249) TGA21_TOBAC TGACG-sequence-specific DNA-binding protein TGA-2.1 (TGA2.1) - Nicotiana tabacum (Common tobacco)moderately similar to ( 288) loc_os11g05480 12011.m04745 protein TGACG-sequence-specific DNA-binding protein TGA-2.1, putative, expressed PGSC0003…
CUST_1946_PI426222305	1.0953	1.64061	1.01709	2.44813	1.08772	2.35681	PGSC0003DMT400053945	C2H2 zinc-finger protein ZPT3-3	chr10	C2H2 zinc-finger protein ZPT3-3	PGSC0003DMP400036343	PGSC0003DMG400020929	PGSC0003DMC400036343	PGSC0003DMT400053945	27.3.11	RNA.regulation of transcription.C2H2 zinc finger family	pgsc0003dmp400036343	weakly similar to ( 115) AT3G60580 | Symbols: | zinc finger (C2H2 type) family protein | chr3:22394007-22394873 FORWARDvery weakly similar to (80.1) loc_os10g40660 12010.m06836 protein cys2/His2 zinc-finger transcription factor, putative, expressed PGSC0003DMT400053945	GO:0005622	GO:0008270
CUST_4261_PI426222305	1.0952	1.57939	1.32268	2.92374	1.00736	3.17435	PGSC0003DMT400020962	Sumo ligase	chr11	Sumo ligase	PGSC0003DMP400014279	PGSC0003DMG400008114	PGSC0003DMC400014279	PGSC0003DMT400020962	27.3.67	RNA.regulation of transcription.putative transcription regulator	pgsc0003dmp400014279	highly similar to ( 589) AT5G60410 | Symbols: ATSIZ1, SIZ1 | SIZ1; DNA binding / SUMO ligase | chr5:24295226-24300792 FORWARDmoderately similar to ( 437) loc_os05g03430 12005.m083605 protein sumoylation ligase E3, putative, expressedzf-MIZ PGSC0003DMT400020962
CUST_2667_PI426222305	1.09484	1.17333	1.03773	2.37862	1.16619	2.28428	PGSC0003DMT400051031	Bromodomain-containing protein	chr11	Bromodomain-containing protein	PGSC0003DMP400034416	PGSC0003DMG400019814	PGSC0003DMC400034416	PGSC0003DMT400051031	27.3.42	RNA.regulation of transcription.Bromodomain proteins	pgsc0003dmp400034416	weakly similar to ( 124) AT1G20670 | Symbols: | DNA-binding bromodomain-containing protein | chr1:7164537-7167933 REVERSEweakly similar to ( 122) loc_os09g37760 12009.m06723 protein DNA binding protein, putative, expressedBROMO PGSC0003DMT400051031		GO:0005515;GO:0004402
CUST_43253_PI426222305	1.09468	1.10205	1.17761	2.84666	1.03033	2.31177	PGSC0003DMT400002079	Photoperiod responsive protein	chr04	Photoperiod responsive protein	PGSC0003DMP400001513	PGSC0003DMG400000791	PGSC0003DMC400001513	PGSC0003DMT400002079	27.3.64	RNA.regulation of transcription.PHOR1	pgsc0003dmp400001513	moderately similar to ( 270) AT5G64660 | Symbols: ATCMPG2, CMPG2 | U-box domain-containing protein | chr5:25842119-25843381 REVERSEvery weakly similar to (87.0) SPL11_ORYSA Spotted leaf protein 11 (Spotted leaf11) (Cell death-related protein SPL11) - Oryza sativa (Rice)weakly similar to ( 117) loc_os02g33680 12002.m08459 protein U-box domain containing protein, expressedUbox PGSC0003DMT400002079
CUST_32056_PI426222305	1.09267	1.57855	1.04078	2.96056	1.13621	2.37292	PGSC0003DMT400083233	O-linked n-acetylglucosamine transferase, ogt	chr06	O-linked n-acetylglucosamine transferase, ogt	PGSC0003DMP400055912	PGSC0003DMG400033134	PGSC0003DMC400055912	PGSC0003DMT400083233	27.3.50	RNA.regulation of transcription.General Transcription	pgsc0003dmp400055912	moderately similar to ( 387) AT1G17680 | Symbols: | transcription factor-related | chr1:6076388-6082160 FORWARDmoderately similar to ( 365) loc_os11g16540 12011.m05739 protein TPR Domain containing protein, expressed PGSC0003DMT400083233	GO:0005634	GO:0003674
CUST_20510_PI426222305	1.09233	1.61553	1.48601	2.49784	1.10562	2.16476	PGSC0003DMT400021317	Pentatricopeptide repeat-containing protein	chr10	Pentatricopeptide repeat-containing protein	PGSC0003DMP400014500	PGSC0003DMG400008266	PGSC0003DMC400014500	PGSC0003DMT400021317	27.3	RNA.regulation of transcription	pgsc0003dmp400014500	moderately similar to ( 420) AT2G15980 | Symbols: | pentatricopeptide (PPR) repeat-containing protein | chr2:6951349-6952845 REVERSEweakly similar to ( 134) RF1_ORYSA Rf1 protein, mitochondrial precursor (PPR protein) (Fertility restorer) (Restorer for CMS) - Oryza sativa (Rice)moderately similar to ( 261) loc_os12g21930 12012.m073818 protein expressed protein PGSC0003DMT400021317
CUST_45319_PI426222305	1.09027	1.83555	1.01452	3.82142	1.16345	3.70152	PGSC0003DMT400001631	DNA binding protein	chr03	DNA binding protein	PGSC0003DMP400001215	PGSC0003DMG400000605	PGSC0003DMC400001215	PGSC0003DMT400001631	27.3.67	RNA.regulation of transcription.putative transcription regulator	pgsc0003dmp400001215	moderately similar to ( 360) AT1G66170 | Symbols: MMD1 | MMD1 (MALE MEIOCYTE DEATH 1); DNA binding / protein binding / zinc ion binding | chr1:24638793-24641222 REVERSEmoderately similar to ( 258) loc_os03g50780 12003.m10064 protein PHD-finger family protein, expressed PGSC0003DMT400001631
CUST_12843_PI426222305	1.0894	1.53685	1.32459	2.19721	1.18094	2.36316	PGSC0003DMT400063395	Excision repair cross-complementing 1 ercc1	chr03	Excision repair cross-complementing 1 ercc1	PGSC0003DMP400042687	PGSC0003DMG400024658	PGSC0003DMC400042687	PGSC0003DMT400063395	27.3.67	RNA.regulation of transcription.putative transcription regulator	pgsc0003dmp400042687	moderately similar to ( 396) AT3G05210 | Symbols: ERCC1, UVR7 | ERCC1; 5'-flap endonuclease | chr3:1479591-1481823 FORWARDmoderately similar to ( 381) loc_os10g37490 12010.m06537 protein mating-type switching protein swi10, putative, expressedRAD10 Rad10 PGSC0003DMT400063395
CUST_1473_PI426222305	1.08624	1.26383	1.08026	2.55582	1.40888	2.34139	PGSC0003DMT400003454	Transcription factor	chr02	Transcription factor	PGSC0003DMP400002458	PGSC0003DMG400001362	PGSC0003DMC400002458	PGSC0003DMT400003454	27.3.29	RNA.regulation of transcription.TCP transcription factor family	pgsc0003dmp400002458	weakly similar to ( 147) AT3G02150 | Symbols: PTF1, TFPD | PTF1 (PLASTID TRANSCRIPTION FACTOR 1); transcription factor | chr3:391522-392589 FORWARDweakly similar to ( 141) loc_os01g55750 12001.m43206 protein TCP family transcription factor containing protein, expressedTCP PGSC0003DMT400003454
CUST_30360_PI426222305	1.08459	1.86843	1.50079	4.03198	1.39704	2.84612	PGSC0003DMT400069865	AG-motif binding protein-2	chr05	AG-motif binding protein-2	PGSC0003DMP400047208	PGSC0003DMG400027167	PGSC0003DMC400047208	PGSC0003DMT400069865	27.3.9	RNA.regulation of transcription.C2C2(Zn) GATA transcription factor family	pgsc0003dmp400047208	weakly similar to ( 147) AT3G24050 | Symbols: | GATA transcription factor 1 (GATA-1) | chr3:8686060-8687462 FORWARDweakly similar to ( 129) loc_os05g44400 12005.m08566 protein GATA transcription factor 13, putative, expressed PGSC0003DMT400069865
CUST_7474_PI426222305	1.08459	1.20823	1.33751	2.98004	1.51893	2.96877	PGSC0003DMT400009635	DNA-binding protein	chr04	DNA-binding protein	PGSC0003DMP400006720	PGSC0003DMG400003761	PGSC0003DMC400006720	PGSC0003DMT400009635	27.3.11	RNA.regulation of transcription.C2H2 zinc finger family	pgsc0003dmp400006720	weakly similar to ( 194) AT3G51060 | Symbols: STY1, SRS1 | STY1 (STYLISH 1); protein heterodimerization/ transcription factor | chr3:18964606-18966130 FORWARDweakly similar to ( 159) loc_os06g49830 12006.m09507 protein SHI, putative, expressedDUF702 PGSC0003DMT400009635
CUST_45442_PI426222305	1.08459	1.17333	1.04688	2.90041	1.40588	2.48131	PGSC0003DMT400059571	Cysteine-rich polycomb	chr08	Cysteine-rich polycomb	PGSC0003DMP400040093	PGSC0003DMG400023147	PGSC0003DMC400040093	PGSC0003DMT400059571	27.3.17	RNA.regulation of transcription.CPP(Zn),CPP1-related transcription factor family	pgsc0003dmp400040093	weakly similar to ( 200) AT4G14770 | Symbols: TCX2, ATTCX2 | TCX2 (TESMIN/TSO1-LIKE CXC 2); transcription factor | chr4:8481522-8484825 REVERSEweakly similar to ( 197) loc_os07g07974 12007.m05257 protein TSO1, putative, expressedCXC PGSC0003DMT400059571
CUST_12444_PI426222305	1.08459	1.17333	1.13732	2.3939	1.98213	3.10417	PGSC0003DMT400088521	Conserved gene of unknown function	chr02	Conserved gene of unknown function	PGSC0003DMP400060196	PGSC0003DMG400038092	PGSC0003DMC400060196	PGSC0003DMT400088521	27.3.25	RNA.regulation of transcription.MYB domain transcription factor family	pgsc0003dmp400060196	highly similar to ( 578) AT1G08070 | Symbols: | pentatricopeptide (PPR) repeat-containing protein | chr1:2514374-2516599 REVERSEweakly similar to ( 105) RF1_ORYSA Rf1 protein, mitochondrial precursor (PPR protein) (Fertility restorer) (Restorer for CMS) - Oryza sativa (Rice)highly similar to ( 663) loc_os03g19980 12003.m101324 protein pentatricopeptide repeat protein PPR986-12, putative, expresse…
CUST_7194_PI426222305	1.08459	1.45453	1.19335	3.26393	1.48465	2.91381	PGSC0003DMT400077258	Type I MADS box transcription factor	chr04	Type I MADS box transcription factor	PGSC0003DMP400052339	PGSC0003DMG400030053	PGSC0003DMC400052339	PGSC0003DMT400077258	27.3.24	RNA.regulation of transcription.MADS box transcription factor family	pgsc0003dmp400052339	weakly similar to ( 108) AT1G65300 | Symbols: PHE2, AGL38 | AGL38 (AGAMOUS-LIKE 38); DNA binding / transcription factor | chr1:24254929-24255765 FORWARDvery weakly similar to (95.5) loc_os01g18440 12001.m08384 protein MADS-box transcription factor PHERES2, putativeMADS_SRF_like MADS PGSC0003DMT400077258
CUST_14593_PI426222305	1.08459	1.76613	1.46454	2.27909	1.04394	2.57602	PGSC0003DMT400066311	B3 domain-containing protein	chr01	Conserved gene of unknown function	PGSC0003DMP400044697	PGSC0003DMG400025790	PGSC0003DMC400044697	PGSC0003DMT400066311	27.3.41	RNA.regulation of transcription.B3 transcription factor family	pgsc0003dmp400044697	weakly similar to ( 135) AT3G19184 | Symbols: | DNA binding | chr3:6637555-6639035 FORWARDweakly similar to ( 129) loc_os03g08620 12003.m06370 protein DNA binding protein, putative, expressed PGSC0003DMT400066311
CUST_24589_PI426222305	1.08459	1.17949	1.30331	3.21133	1.20352	2.72939	PGSC0003DMT400054422	PHAVOLUTA-like HD-ZIPIII protein	chr02	PHAVOLUTA-like HD-ZIPIII protein	PGSC0003DMP400036616	PGSC0003DMG400021125	PGSC0003DMC400036616	PGSC0003DMT400054422	27.3.22	RNA.regulation of transcription.HB,Homeobox transcription factor family	pgsc0003dmp400036616	nearly identical (1306) AT2G34710 | Symbols: PHB, ATHB14, ATHB-14, PHB-1D | PHB (PHABULOSA); DNA binding / transcription factor | chr2:14639548-14643993 REVERSEnearly identical (1292) loc_os03g43930 12003.m09434 protein class III HD-Zip protein 4, putative, expressedMEKHLA START START START PGSC0003DMT400054422
CUST_2858_PI426222305	1.08459	1.6424	1.04403	4.93219	1.42687	2.60153	PGSC0003DMT400000507	DNA binding protein	chr01	DNA binding protein	PGSC0003DMP400000384	PGSC0003DMG400000178	PGSC0003DMC400000384	PGSC0003DMT400000507	27.3.67	RNA.regulation of transcription.putative transcription regulator	pgsc0003dmp400000384	moderately similar to ( 213) AT2G46040 | Symbols: | ARID/BRIGHT DNA-binding domain-containing protein / ELM2 domain-containing protein | chr2:18935684-18937807 REVERSEweakly similar to ( 163) loc_os04g08410 12004.m06129 protein expressed protein PGSC0003DMT400000507	GO:0005634	GO:0003677
CUST_41691_PI426222305	1.08459	1.17333	1.03773	3.42871	1.13517	2.54341	PGSC0003DMT400014088	MYC2	chr10	MYC2	PGSC0003DMP400009734	PGSC0003DMG400005525	PGSC0003DMC400009734	PGSC0003DMT400014088	27.3.6	RNA.regulation of transcription.bHLH,Basic Helix-Loop-Helix family	pgsc0003dmp400009734	weakly similar to ( 155) AT4G00870 | Symbols: | basic helix-loop-helix (bHLH) family protein | chr4:362230-363639 REVERSEvery weakly similar to (93.6) loc_os01g13460 12001.m42935 protein helix-loop-helix DNA-binding domain containing protein, expressed PGSC0003DMT400014088
CUST_28622_PI426222305	1.08459	1.44114	1.06141	2.72917	1.02532	2.39122	PGSC0003DMT400088489	MADS-box protein AGL35		MADS-box protein AGL35	PGSC0003DMP400060164	PGSC0003DMG400038060	PGSC0003DMC400060164	PGSC0003DMT400088489	27.3.24	RNA.regulation of transcription.MADS box transcription factor family	pgsc0003dmp400060164	very weakly similar to (83.6) AT1G65300 | Symbols: PHE2, AGL38 | AGL38 (AGAMOUS-LIKE 38); DNA binding / transcription factor | chr1:24254929-24255765 FORWARDvery weakly similar to (82.8) loc_os01g18440 12001.m08384 protein MADS-box transcription factor PHERES2, putative PGSC0003DMT400088489	GO:0005634	GO:0003700;GO:0003677;GO:0046983
CUST_30796_PI426222305	1.08459	1.98589	1.03824	10.9643	1.56817	4.04233	PGSC0003DMT400018841	MYB12	chr08	MYB12	PGSC0003DMP400012935	PGSC0003DMG400007304	PGSC0003DMC400012935	PGSC0003DMT400018841	27.3.25	RNA.regulation of transcription.MYB domain transcription factor family	pgsc0003dmp400012935	moderately similar to ( 207) AT2G47460 | Symbols: MYB12, ATMYB12, PFG1 | MYB12 (MYB DOMAIN PROTEIN 12); DNA binding / transcription activator/ transcription factor | chr2:19476438-19479242 FORWARDmoderately similar to ( 211) MYBP_MAIZE Myb-related protein P - Zea mays (Maize)weakly similar to ( 196) loc_os03g19120 12003.m07329 protein yellow seed1, putative PGSC0003DMT400018841
CUST_39859_PI426222305	1.08459	1.73924	1.30288	3.50825	1.76702	3.00903	PGSC0003DMT400047530	Conserved gene of unknown function	chr08	Conserved gene of unknown function	PGSC0003DMP400032182	PGSC0003DMG400018471	PGSC0003DMC400032182	PGSC0003DMT400047530	27.3.25	RNA.regulation of transcription.MYB domain transcription factor family	pgsc0003dmp400032182	moderately similar to ( 329) AT5G48910 | Symbols: | pentatricopeptide (PPR) repeat-containing protein | chr5:19832969-19834909 REVERSEmoderately similar to ( 336) loc_os07g20420 12007.m06427 protein tetratricopeptide-like helical, putative, expressed PGSC0003DMT400047530
CUST_3703_PI426222305	1.08459	1.89942	1.55203	3.03636	1.03178	3.6488	PGSC0003DMT400010346	DNA binding protein	chr10	DNA binding protein	PGSC0003DMP400007210	PGSC0003DMG400004040	PGSC0003DMC400007210	PGSC0003DMT400010346	27.3.99	RNA.regulation of transcription.unclassified	pgsc0003dmp400007210	weakly similar to ( 189) AT1G45207 | Symbols: | remorin family protein | chr1:17130703-17133548 REVERSEweakly similar to ( 198) loc_os02g52810 12002.m33459 protein remorin, C-terminal region family protein, expressedRemorin_C PGSC0003DMT400010346
CUST_31875_PI426222305	1.08459	1.50633	1.12868	2.662	1.28322	2.31147	PGSC0003DMT400092312	SGR	chr03	SGR	PGSC0003DMP400063987	PGSC0003DMG400041883	PGSC0003DMC400063987	PGSC0003DMT400092312	27.3.3	RNA.regulation of transcription.AP2/EREBP, APETALA2/Ethylene-responsive element binding protein family	pgsc0003dmp400063987	very weakly similar to (95.1) AT2G40220 | Symbols: ABI4, SUN6, SIS5, ISI3, GIN6, SAN5 | ABI4 (ABA INSENSITIVE 4); DNA binding / transcription factor | chr2:16796599-16797585 REVERSEvery weakly similar to (85.9) loc_os05g28350 12005.m07121 protein AP2 domain transcription factor, putative, expressedAP2 AP2 PGSC0003DMT400092312	GO:0005634	GO:0003700;GO:0003677
CUST_21557_PI426222305	1.08459	1.22709	1.03773	3.39283	1.16575	3.63711	PGSC0003DMT400024003	Transcription factor RF2a	chr11	Transcription factor RF2a	PGSC0003DMP400016377	PGSC0003DMG400009283	PGSC0003DMC400016377	PGSC0003DMT400024003	27.3.35	RNA.regulation of transcription.bZIP transcription factor family	pgsc0003dmp400016377	weakly similar to ( 162) AT1G58110 | Symbols: | bZIP family transcription factor | chr1:21515919-21517374 REVERSEweakly similar to ( 160) loc_os11g11100 12011.m05303 protein DNA binding protein, putative, expressed PGSC0003DMT400024003		GO:0003700;GO:0046983;GO:0043565
CUST_29476_PI426222305	1.08459	1.17333	1.03773	3.12926	1.04906	3.45641	PGSC0003DMT400075908	Two-component sensor histidine kinase bacteria	chr04	Two-component sensor histidine kinase bacteria	PGSC0003DMP400051408	PGSC0003DMG400029514	PGSC0003DMC400051408	PGSC0003DMT400075908	27.3.5	RNA.regulation of transcription.ARR	pgsc0003dmp400051408	moderately similar to ( 316) AT4G16110 | Symbols: ARR2 | ARR2 (ARABIDOPSIS RESPONSE REGULATOR 2); transcription factor/ two-component response regulator | chr4:9112979-9115785 FORWARDvery weakly similar to (90.1) PRR95_ORYSA Two-component response regulator-like PRR95 (Pseudo-response regulator 95) (OsPRR95) - Oryza sativa (Rice)moderately similar to ( 378) loc_os03g12350 12003.m101249 protein tw…
CUST_19515_PI426222305	1.08459	1.97375	1.25663	3.04221	1.23084	2.7348	PGSC0003DMT400023272	WRKY transcription factor IIe-1	chr01	WRKY transcription factor IIe-1	PGSC0003DMP400015849	PGSC0003DMG400009014	PGSC0003DMC400015849	PGSC0003DMT400023272	27.3.32	RNA.regulation of transcription.WRKY domain transcription factor family	pgsc0003dmp400015849	weakly similar to ( 113) AT2G34830 | Symbols: WRKY35, MEE24, AtWRKY35 | WRKY35 (WRKY DNA-binding protein 35); transcription factor | chr2:14693839-14696378 REVERSEweakly similar to ( 115) loc_os02g47060 12002.m09741 protein OsWRKY66 - Superfamily of rice TFs having WRKY and zinc finger domains, expressedWRKY PGSC0003DMT400023272		GO:0003700;GO:0043565
CUST_48516_PI426222305	1.08459	1.17333	1.05263	2.81155	1.10009	2.72846	PGSC0003DMT400092266	Pentatricopeptide repeat-containing protein, mitochondrial		Pentatricopeptide repeat-containing protein, mitochondrial	PGSC0003DMP400063941	PGSC0003DMG400041837	PGSC0003DMC400063941	PGSC0003DMT400092266	27.3.67	RNA.regulation of transcription.putative transcription regulator	pgsc0003dmp400063941	weakly similar to ( 198) AT4G02820 | Symbols: | pentatricopeptide (PPR) repeat-containing protein | chr4:1258581-1260265 FORWARDweakly similar to ( 175) loc_os12g34340 12012.m07228 protein tetratricopeptide-like helical, putative, expressed PGSC0003DMT400092266	GO:0005739
CUST_50952_PI426222305	1.08459	1.43576	1.38136	2.80279	1.0929	2.74241	PGSC0003DMT400082788	Squamosa promoter-binding protein	chr07	Squamosa promoter binding	PGSC0003DMP400055717	PGSC0003DMG400032817	PGSC0003DMC400055717	PGSC0003DMT400082788	27.3.28	RNA.regulation of transcription.SBP,Squamosa promoter binding protein family	pgsc0003dmp400055717	very weakly similar to (88.2) AT1G02065 | Symbols: SPL8 | SPL8 (SQUAMOSA PROMOTER BINDING PROTEIN-LIKE 8); DNA binding | chr1:365625-367149 FORWARDvery weakly similar to (81.6) LG1_MAIZE LIGULELESS1 protein - Zea mays (Maize)very weakly similar to (85.1) loc_os06g44860 12006.m09013 protein SBP-domain protein 4, putative, expressed PGSC0003DMT400082788
CUST_20152_PI426222305	1.08459	1.17333	1.03773	2.65394	1.10578	3.00115	PGSC0003DMT400091294	Histone-lysine n-methyltransferase, suvh	chr03	Histone-lysine n-methyltransferase, suvh	PGSC0003DMP400062969	PGSC0003DMG400040865	PGSC0003DMC400062969	PGSC0003DMT400091294	27.3.69	RNA.regulation of transcription.SET-domain transcriptional regulator family	pgsc0003dmp400062969	very weakly similar to (86.7) AT2G22740 | Symbols: SUVH6, SDG23 | SUVH6; methyl-CpG binding / methyl-CpNpG binding / methyl-CpNpN binding / methyltransferase | chr2:9664256-9666628 REVERSEweakly similar to ( 102) loc_os04g45990 12004.m09550 protein histone-lysine N-methyltransferase, H3 lysine-9 specific SUVH6, putative, expressed PGSC0003DMT400091294	GO:0005634	GO:0008270;GO:0018024
CUST_37152_PI426222305	1.08459	1.22776	1.46875	2.35893	1.08433	2.36845	PGSC0003DMT400082477	Zinc finger family protein	chr04	Zinc finger family protein	PGSC0003DMP400055623	PGSC0003DMG400032559	PGSC0003DMC400055623	PGSC0003DMT400082477	27.3.99	RNA.regulation of transcription.unclassified	pgsc0003dmp400055623	moderately similar to ( 369) AT3G18620 | Symbols: | zinc finger (DHHC type) family protein | chr3:6408849-6410716 FORWARDmoderately similar to ( 331) loc_os06g20400 12006.m31797 protein DHHC zinc finger domain containing protein, expressedCOG5273 zf-DHHC PGSC0003DMT400082477
CUST_14627_PI426222305	1.08459	1.45242	1.1306	2.15775	1.31379	2.28548	PGSC0003DMT400066313	DNA binding protein	chr01	Conserved gene of unknown function	PGSC0003DMP400044699	PGSC0003DMG400025790	PGSC0003DMC400044699	PGSC0003DMT400066313	27.3.41	RNA.regulation of transcription.B3 transcription factor family	pgsc0003dmp400044699	weakly similar to ( 143) AT3G19184 | Symbols: | DNA binding | chr3:6637555-6639035 FORWARDweakly similar to ( 134) loc_os03g08620 12003.m06370 protein DNA binding protein, putative, expressed PGSC0003DMT400066313
CUST_32883_PI426222305	1.08459	1.6086	1.03773	3.07089	1.00754	3.47749	PGSC0003DMT400097081	MADS-box family protein	chr02	MADS-box family protein	PGSC0003DMP400068756	PGSC0003DMG400046652	PGSC0003DMC400068756	PGSC0003DMT400097081	27.3.24	RNA.regulation of transcription.MADS box transcription factor family	pgsc0003dmp400068756	PGSC0003DMT400097081	GO:0005634	GO:0003700;GO:0003677;GO:0046983
CUST_24499_PI426222305	1.08459	1.28887	1.03773	3.13851	1.33959	3.14657	PGSC0003DMT400054421	PHAVOLUTA-like HD-ZIPIII protein	chr07	PHAVOLUTA-like HD-ZIPIII protein	PGSC0003DMP400036615	PGSC0003DMG400021125	PGSC0003DMC400036615	PGSC0003DMT400054421	27.3.22	RNA.regulation of transcription.HB,Homeobox transcription factor family	pgsc0003dmp400036615	nearly identical (1301) AT2G34710 | Symbols: PHB, ATHB14, ATHB-14, PHB-1D | PHB (PHABULOSA); DNA binding / transcription factor | chr2:14639548-14643993 REVERSEnearly identical (1287) loc_os03g43930 12003.m09434 protein class III HD-Zip protein 4, putative, expressedMEKHLA START START START PGSC0003DMT400054421
CUST_49263_PI426222305	1.08459	1.17333	1.07373	4.10008	1.15472	2.39094	PGSC0003DMT400008810	SDG14 (SET DOMAIN PROTEIN 14); DNA binding / protein binding / zinc ion binding	chr12	SDG14 (SET DOMAIN PROTEIN 14); DNA binding / protein binding / zinc ion binding	PGSC0003DMP400006106	PGSC0003DMG400003421	PGSC0003DMC400006106	PGSC0003DMT400008810	27.3.69	RNA.regulation of transcription.SET-domain transcriptional regulator family	pgsc0003dmp400006106	very weakly similar to (91.3) AT3G61740 | Symbols: ATX3 | SDG14 (SET DOMAIN PROTEIN 14); DNA binding / protein binding / zinc ion binding | chr3:22851133-22856548 REVERSEvery weakly similar to (93.2) loc_os01g46700 12001.m10867 protein SET domain containing protein, expressed PGSC0003DMT400008810
CUST_32920_PI426222305	1.08459	1.17333	1.03773	3.46375	1.0216	2.6513	PGSC0003DMT400090704	SNF2 domain-containing protein / helicase domain-containing protein / RING finger domain-containing protein	chr05	SNF2 domain-containing protein / helicase domain-containing protein / RING finger domain-containing protein	PGSC0003DMP400062379	PGSC0003DMG400040275	PGSC0003DMC400062379	PGSC0003DMT400090704	27.3.44	RNA.regulation of transcription.Chromatin Remodeling Factors	pgsc0003dmp400062379	weakly similar to ( 129) AT1G05120 | Symbols: | SNF2 domain-containing protein / helicase domain-containing protein / RING finger domain-containing protein | chr1:1471624-1476067 REVERSEweakly similar to ( 125) loc_os07g32730 12007.m07536 protein DNA repair protein rhp16, putative, expressed PGSC0003DMT400090704		GO:0005524;GO:0003677;GO:0008270;GO:0004386
CUST_7_PI426222305	1.08459	1.52146	1.03773	3.2522	1.00722	3.36351	PGSC0003DMT400038759	Basic helix-loop-helix family protein	chr01	Basic helix-loop-helix family protein	PGSC0003DMP400026346	PGSC0003DMG400014979	PGSC0003DMC400026346	PGSC0003DMT400038759	27.3.6	RNA.regulation of transcription.bHLH,Basic Helix-Loop-Helix family	pgsc0003dmp400026346	very weakly similar to (91.7) AT1G49770 | Symbols: RGE1, ZOU | RGE1 (RETARDED GROWTH OF EMBRYO 1); DNA binding / transcription factor | chr1:18424578-18426531 FORWARDvery weakly similar to (85.5) loc_os04g35010 12004.m08593 protein DNA binding protein, putative, expressed PGSC0003DMT400038759
CUST_18513_PI426222305	1.08459	1.41951	1.03773	3.11148	1.05776	3.01193	PGSC0003DMT400042400	WRKY protein	chr03	WRKY protein	PGSC0003DMP400028763	PGSC0003DMG400016441	PGSC0003DMC400028763	PGSC0003DMT400042400	27.3.32	RNA.regulation of transcription.WRKY domain transcription factor family	pgsc0003dmp400028763	moderately similar to ( 344) AT1G62300 | Symbols: WRKY6, ATWRKY6 | WRKY6; transcription factor | chr1:23016887-23019155 REVERSEmoderately similar to ( 312) loc_os01g14440 12001.m08049 protein OsWRKY1v2 - Superfamily of rice TFs having WRKY and zinc finger domains, expressedWRKY PGSC0003DMT400042400	GO:0005634	GO:0003700;GO:0043565
CUST_113_PI426222305	1.08459	1.19101	1.03773	3.10219	1.05698	2.90739	PGSC0003DMT400038758	Calmodulin-binding transcription activator (Camta), plants	chr01	Calmodulin-binding transcription activator (Camta), plants	PGSC0003DMP400026345	PGSC0003DMG400014978	PGSC0003DMC400026345	PGSC0003DMT400038758	27.3.39	RNA.regulation of transcription.AtSR Transcription Factor family	pgsc0003dmp400026345	moderately similar to ( 422) AT5G64220 | Symbols: | calmodulin-binding protein | chr5:25686434-25691903 FORWARDmoderately similar to ( 441) loc_os03g09100 12003.m06416 protein calmodulin-binding transcription activator 2, putative, expressed PGSC0003DMT400038758	GO:0005634	GO:0005515;GO:0003677
CUST_36804_PI426222305	1.08459	1.17333	1.03773	2.98324	1.00654	2.68129	PGSC0003DMT400004055	Retinoblastoma-binding protein	chr01	Retinoblastoma-binding protein	PGSC0003DMP400002900	PGSC0003DMG400001600	PGSC0003DMC400002900	PGSC0003DMT400004055	27.3.67	RNA.regulation of transcription.putative transcription regulator	pgsc0003dmp400002900	moderately similar to ( 278) AT5G47430 | Symbols: | zinc ion binding | chr5:19235819-19240147 REVERSEmoderately similar to ( 281) loc_os10g29560 12010.m05825 protein expressed proteinCOG5222 DWNN PGSC0003DMT400004055
CUST_7737_PI426222305	1.08459	1.17333	1.03773	2.88688	1.12839	2.49937	PGSC0003DMT400025627	Auxin-responsive family protein	chr04	Auxin-responsive family protein	PGSC0003DMP400017462	PGSC0003DMG400009897	PGSC0003DMC400017462	PGSC0003DMT400025627	27.3.80	RNA.regulation of transcription.zf-HD	pgsc0003dmp400017462	weakly similar to ( 114) AT1G20470 | Symbols: | auxin-responsive family protein | chr1:7094325-7094765 FORWARDweakly similar to ( 104) loc_os09g29130 12009.m06064 protein ZF-HD protein dimerisation region containing protein, expressed PGSC0003DMT400025627
CUST_24648_PI426222305	1.08459	1.46686	1.08114	2.85832	1.11601	2.62115	PGSC0003DMT400054420	PHAVOLUTA-like HD-ZIPIII protein	chr02	PHAVOLUTA-like HD-ZIPIII protein	PGSC0003DMP400036614	PGSC0003DMG400021125	PGSC0003DMC400036614	PGSC0003DMT400054420	27.3.22	RNA.regulation of transcription.HB,Homeobox transcription factor family	pgsc0003dmp400036614	highly similar to ( 968) AT2G34710 | Symbols: PHB, ATHB14, ATHB-14, PHB-1D | PHB (PHABULOSA); DNA binding / transcription factor | chr2:14639548-14643993 REVERSEhighly similar to ( 934) loc_os03g43930 12003.m09434 protein class III HD-Zip protein 4, putative, expressedSTART START START PGSC0003DMT400054420		GO:0003700;GO:0046983;GO:0043565
CUST_4732_PI426222305	1.08459	1.17333	1.19985	2.81889	1.04112	2.39438	PGSC0003DMT400090923	WRKY transcription factor 27	chr04	WRKY transcription factor 27	PGSC0003DMP400062598	PGSC0003DMG400040494	PGSC0003DMC400062598	PGSC0003DMT400090923	27.3.32	RNA.regulation of transcription.WRKY domain transcription factor family	pgsc0003dmp400062598	weakly similar to ( 109) AT5G52830 | Symbols: WRKY27, ATWRKY27 | WRKY27; transcription factor | chr5:21410996-21412218 FORWARDweakly similar to ( 107) loc_os02g16540 12002.m77729 protein OsWRKY39v2 - Superfamily of rice TFs having WRKY and zinc finger domains, expressedWRKY PGSC0003DMT400090923	GO:0005634	GO:0003700;GO:0043565
CUST_9029_PI426222305	1.08459	1.18948	1.03773	2.66385	1.1361	2.70328	PGSC0003DMT400061858	Homeobox-leucine zipper protein PROTODERMAL FACTOR 2	chr03	Homeobox-leucine zipper protein PROTODERMAL FACTOR 2	PGSC0003DMP400041640	PGSC0003DMG400024068	PGSC0003DMC400041640	PGSC0003DMT400061858	27.3.22	RNA.regulation of transcription.HB,Homeobox transcription factor family	pgsc0003dmp400041640	highly similar to ( 608) AT4G04890 | Symbols: PDF2 | PDF2 (PROTODERMAL FACTOR 2); DNA binding / transcription factor | chr4:2476970-2480090 REVERSEhighly similar to ( 538) loc_os04g53540 12004.m101662 protein homeobox protein GLABRA2, putative, expressedSTART START START PGSC0003DMT400061858
CUST_37065_PI426222305	1.08459	1.23843	1.13217	2.65077	1.01123	2.24977	PGSC0003DMT400022194	Charged multivesicular body protein 4b	chr04	Charged multivesicular body protein 4b	PGSC0003DMP400015135	PGSC0003DMG400008614	PGSC0003DMC400015135	PGSC0003DMT400022194	27.3.71	RNA.regulation of transcription.SNF7	pgsc0003dmp400015135	weakly similar to ( 101) AT4G29160 | Symbols: SNF7.1 | SNF7.1 | chr4:14381019-14382342 FORWARDweakly similar to ( 105) loc_os06g40620 12006.m32109 protein charged multivesicular body protein 4b, putative, expressed PGSC0003DMT400022194
CUST_43592_PI426222305	1.08459	1.2191	1.03773	2.44988	1.02511	2.03561	PGSC0003DMT400064752	WIN1	chr02	WIN1	PGSC0003DMP400043655	PGSC0003DMG400025151	PGSC0003DMC400043655	PGSC0003DMT400064752	27.3.3	RNA.regulation of transcription.AP2/EREBP, APETALA2/Ethylene-responsive element binding protein family	pgsc0003dmp400043655	very weakly similar to (91.3) AT5G19790 | Symbols: RAP2.11 | RAP2.11 (related to AP2 11); DNA binding / transcription factor | chr5:6689271-6690032 REVERSEweakly similar to ( 105) loc_os12g39330 12012.m07718 protein AP2 domain containing protein, expressedAP2 AP2 PGSC0003DMT400064752
CUST_15783_PI426222305	1.08459	1.17333	1.03773	2.44695	1.01553	2.60598	PGSC0003DMT400057562	Cyclin-like F-box	chr02	Cyclin-like F-box	PGSC0003DMP400038733	PGSC0003DMG400022354	PGSC0003DMC400038733	PGSC0003DMT400057562	27.3.67	RNA.regulation of transcription.putative transcription regulator	pgsc0003dmp400038733	very weakly similar to (84.0) AT1G61320 | Symbols: | FUNCTIONS IN: molecular_function unknown; INVOLVED IN: biological_process unknown; LOCATED IN: cellular_component unknown; CONTAINS InterPro DOMAIN/s: FBD (InterPro:IPR013596), FBD-like (InterPro:IPR006566); BEST Arabidopsis thaliana protein match is: F-box family protein (TAIR:AT1G61330.1); Has 264 Blast hits to 264 proteins in 7 species: Arch…
CUST_12027_PI426222305	1.08459	1.28807	1.03773	2.42707	1.019	2.47524	PGSC0003DMT400016549	Charged multivesicular body protein 4b	chr12	Charged multivesicular body protein 4b	PGSC0003DMP400011472	PGSC0003DMG400006464	PGSC0003DMC400011472	PGSC0003DMT400016549	27.3.71	RNA.regulation of transcription.SNF7	pgsc0003dmp400011472	weakly similar to ( 105) AT2G19830 | Symbols: SNF7.2, VPS32 | SNF7.2 | chr2:8558101-8559389 REVERSEvery weakly similar to (97.8) loc_os06g40620 12006.m32109 protein charged multivesicular body protein 4b, putative, expressed PGSC0003DMT400016549
CUST_49861_PI426222305	1.08459	1.34142	1.03773	2.35776	1.23374	2.61683	PGSC0003DMT400013136	Mads box protein	chr01	Mads box protein	PGSC0003DMP400009108	PGSC0003DMG400005131	PGSC0003DMC400009108	PGSC0003DMT400013136	27.3.24	RNA.regulation of transcription.MADS box transcription factor family	pgsc0003dmp400009108	weakly similar to ( 180) AT5G60440 | Symbols: AGL62 | AGL62 (Agamous-like 62); DNA binding / transcription factor | chr5:24306329-24307520 FORWARDvery weakly similar to (88.6) loc_os01g74440 12001.m13469 protein DNA binding protein, putativeMADS_MEF2_like PGSC0003DMT400013136
CUST_50937_PI426222305	1.08459	1.17333	1.03773	2.35311	1.0902	2.19311	PGSC0003DMT400095980	Mads box protein	chr03	Mads box protein	PGSC0003DMP400067655	PGSC0003DMG400045551	PGSC0003DMC400067655	PGSC0003DMT400095980	27.3.24	RNA.regulation of transcription.MADS box transcription factor family	pgsc0003dmp400067655	very weakly similar to (86.3) AT5G60440 | Symbols: AGL62 | AGL62 (Agamous-like 62); DNA binding / transcription factor | chr5:24306329-24307520 FORWARDMADS_MEF2_like PGSC0003DMT400095980
CUST_39892_PI426222305	1.08459	1.17333	1.03773	2.3374	1.00557	2.1832	PGSC0003DMT400047544	SWIb domain-containing protein	chr08	SWIb domain-containing protein	PGSC0003DMP400032195	PGSC0003DMG400018478	PGSC0003DMC400032195	PGSC0003DMT400047544	27.3.44	RNA.regulation of transcription.Chromatin Remodeling Factors	pgsc0003dmp400032195	weakly similar to ( 124) AT2G35605 | Symbols: | SWIB complex BAF60b domain-containing protein | chr2:14946161-14947027 FORWARDweakly similar to ( 117) loc_os02g03730 12002.m05722 protein SWIb domain-containing protein, putative, expressedSWIB SWIB PGSC0003DMT400047544
CUST_47521_PI426222305	1.08459	1.5407	1.03773	2.27723	1.1284	2.01635	PGSC0003DMT400088611	Mads box protein	chr09	Mads box protein	PGSC0003DMP400060286	PGSC0003DMG400038182	PGSC0003DMC400060286	PGSC0003DMT400088611	27.3.24	RNA.regulation of transcription.MADS box transcription factor family	pgsc0003dmp400060286	PGSC0003DMT400088611	GO:0005634	GO:0003700;GO:0003677;GO:0046983
CUST_38221_PI426222305	1.08459	1.17333	1.12855	2.12238	1.00771	2.45992	PGSC0003DMT400067322	MYB domain class transcription factor	chr07	MYB domain class transcription factor	PGSC0003DMP400045419	PGSC0003DMG402026177	PGSC0003DMC400045419	PGSC0003DMT400067322	27.3.25	RNA.regulation of transcription.MYB domain transcription factor family	pgsc0003dmp400045419	weakly similar to ( 172) AT5G16770 | Symbols: AtMYB9 | AtMYB9 (myb domain protein 9); DNA binding / transcription factor | chr5:5515209-5516734 FORWARDweakly similar to ( 168) MYB4_ORYSA Myb-related protein Myb4 (OsMyb4) (Transcription factor RLTR1) - Oryza sativa (Rice)weakly similar to ( 177) loc_os08g37970 12008.m07782 protein myb-like DNA-binding domain containing protein, expressed PGSC0003D…		GO:0003677;GO:0003682
CUST_44281_PI426222305	1.08459	1.17333	1.03773	2.11061	1.06972	2.48209	PGSC0003DMT400010004	AT-hook DNA-binding protein	chr08	AT-hook DNA-binding protein	PGSC0003DMP400006976	PGSC0003DMG400003920	PGSC0003DMC400006976	PGSC0003DMT400010004	27.3.67	RNA.regulation of transcription.putative transcription regulator	pgsc0003dmp400006976	moderately similar to ( 213) AT2G45430 | Symbols: | DNA-binding protein-related | chr2:18727848-18728801 FORWARDmoderately similar to ( 214) loc_os02g25020 12002.m07649 protein DNA binding protein, putative, expressedDUF296 PGSC0003DMT400010004	GO:0005634	GO:0003680
CUST_2904_PI426222305	1.08459	1.1894	1.03773	2.63694	1.20026	2.85028	PGSC0003DMT400000600	Triptychon and cpc	chr01	Triptychon and cpc	PGSC0003DMP400000454	PGSC0003DMG400000212	PGSC0003DMC400000454	PGSC0003DMT400000600	27.3.26	RNA.regulation of transcription.MYB-related transcription factor family	pgsc0003dmp400000454	very weakly similar to (80.5) AT5G53200 | Symbols: TRY | TRY (TRIPTYCHON); DNA binding / transcription factor | chr5:21582913-21583960 FORWARD PGSC0003DMT400000600
CUST_11108_PI426222305	1.08459	1.19718	1.03773	3.37042	1.01633	3.16984	PGSC0003DMT400037715	MYB transcription factor	chr04	MYB transcription factor MYB84	PGSC0003DMP400025628	PGSC0003DMG400014550	PGSC0003DMC400025628	PGSC0003DMT400037715	27.3.25	RNA.regulation of transcription.MYB domain transcription factor family	pgsc0003dmp400025628	weakly similar to ( 111) AT1G68320 | Symbols: MYB62, AtMYB62, BW62B, BW62C | MYB62 (myb domain protein 62); DNA binding / transcription factor | chr1:25603842-25604884 FORWARDweakly similar to ( 102) loc_os01g03720 12001.m07009 protein MYB transcription factor, putative, expressed PGSC0003DMT400037715		GO:0003677
CUST_14053_PI426222305	1.08459	1.96371	1.03773	3.3672	1.07073	2.89762	PGSC0003DMT400060043	WRKY transcription factor	chr05	WRKY transcription factor	PGSC0003DMP400040390	PGSC0003DMG400023360	PGSC0003DMC400040390	PGSC0003DMT400060043	27.3.32	RNA.regulation of transcription.WRKY domain transcription factor family	pgsc0003dmp400040390	very weakly similar to (96.7) AT5G07100 | Symbols: WRKY26 | WRKY26; transcription factor | chr5:2204813-2205647 FORWARDvery weakly similar to (97.1) loc_os01g61080 12001.m12235 protein OsWRKY24 - Superfamily of rice TFs having WRKY and zinc finger domains, expressedWRKY PGSC0003DMT400060043
CUST_22192_PI426222305	1.08459	1.4189	1.17059	3.29104	1.07863	3.0529	PGSC0003DMT400047656	SET domain protein	chr03	SET domain protein	PGSC0003DMP400032276	PGSC0003DMG400018520	PGSC0003DMC400032276	PGSC0003DMT400047656	27.3.69	RNA.regulation of transcription.SET-domain transcriptional regulator family	pgsc0003dmp400032276	moderately similar to ( 374) AT5G24330 | Symbols: ATXR6, SDG34 | ATXR6; DNA binding / protein binding | chr5:8295245-8296997 REVERSEmoderately similar to ( 381) loc_os02g03030 12002.m05653 protein histone-lysine N-methyltransferase ATXR6, putative, expressedSET PGSC0003DMT400047656
CUST_6772_PI426222305	1.08459	1.75044	1.49587	2.97	1.13424	3.2316	PGSC0003DMT400014324	AP2/ERF domain-containing transcription factor	chr03	AP2/ERF domain-containing transcription factor	PGSC0003DMP400009887	PGSC0003DMG400005621	PGSC0003DMC400009887	PGSC0003DMT400014324	27.3.3	RNA.regulation of transcription.AP2/EREBP, APETALA2/Ethylene-responsive element binding protein family	pgsc0003dmp400009887	very weakly similar to (89.0) loc_os12g39330 12012.m07718 protein AP2 domain containing protein, expressedAP2 AP2 PGSC0003DMT400014324
CUST_19845_PI426222305	1.08459	1.43591	1.03773	2.9314	1.11341	2.39597	PGSC0003DMT400053397	Transcription factor	chr01	Transcription factor	PGSC0003DMP400036024	PGSC0003DMG400020716	PGSC0003DMC400036024	PGSC0003DMT400053397	27.3.80	RNA.regulation of transcription.zf-HD	pgsc0003dmp400036024	moderately similar to ( 206) AT1G14440 | Symbols: AtHB31 | AtHB31 (ARABIDOPSIS THALIANA HOMEOBOX PROTEIN 31); DNA binding / transcription factor | chr1:4939076-4940014 REVERSEweakly similar to ( 170) loc_os09g29130 12009.m06064 protein ZF-HD protein dimerisation region containing protein, expressedZF-HD_dimer PGSC0003DMT400053397		GO:0003677
CUST_17916_PI426222305	1.08459	1.26428	1.03773	2.76761	1.01179	2.38033	PGSC0003DMT400018195	Zinc finger protein	chr07	Zinc finger protein	PGSC0003DMP400012524	PGSC0003DMG400007061	PGSC0003DMC400012524	PGSC0003DMT400018195	27.3.7	RNA.regulation of transcription.C2C2(Zn) CO-like, Constans-like zinc finger family	pgsc0003dmp400012524	moderately similar to ( 238) AT1G78600 | Symbols: LZF1, STH3 | LZF1 (LIGHT-REGULATED ZINC FINGER PROTEIN 1); transcription factor/ zinc ion binding | chr1:29567370-29568662 FORWARDweakly similar to ( 172) loc_os06g05890 12006.m05315 protein zinc finger B-box protein, putative, expressed PGSC0003DMT400018195
CUST_43851_PI426222305	1.08459	1.4662	1.03773	2.74708	1.19614	2.55216	PGSC0003DMT400016279	Conserved gene of unknown function	chr04	Conserved gene of unknown function	PGSC0003DMP400011289	PGSC0003DMG400006363	PGSC0003DMC400011289	PGSC0003DMT400016279	27.3.67	RNA.regulation of transcription.putative transcription regulator	pgsc0003dmp400011289	weakly similar to ( 151) AT1G20220 | Symbols: | nucleic acid binding | chr1:7005090-7007285 REVERSEweakly similar to ( 170) loc_os09g37006 12009.m22212 protein ribonuclease P, putative, expressed PGSC0003DMT400016279
CUST_259_PI426222305	1.08459	1.17333	1.03773	2.54486	1.06944	2.36037	PGSC0003DMT400024218	Protein VERNALIZATION-INSENSITIVE	chr05	Protein VERNALIZATION-INSENSITIVE	PGSC0003DMP400016544	PGSC0003DMG400009357	PGSC0003DMC400016544	PGSC0003DMT400024218	27.3.67	RNA.regulation of transcription.putative transcription regulator	pgsc0003dmp400016544	moderately similar to ( 273) AT4G30200 | Symbols: VEL1 | Encodes a protein with similarity to VRN5 and VIN3.Contains both a fibronectin III and PHD finger domain. VEL1 is a part of a polycomb repressive complex (PRC2) that is involved in epigenetic silencing of the FLC flowering locus. | chr4:14786852-14790070 REVERSEmoderately similar to ( 392) loc_os08g12430 12008.m26619 protein expressed prote…
CUST_41097_PI426222305	1.08459	1.17333	1.03773	2.52739	1.05428	2.42214	PGSC0003DMT400004441	DNA-binding protein S1FA	chr09	DNA-binding protein S1FA	PGSC0003DMP400003167	PGSC0003DMG400001772	PGSC0003DMC400003167	PGSC0003DMT400004441	27.3.81	RNA.regulation of transcription.S1FA	pgsc0003dmp400003167	S1FA PGSC0003DMT400004441
CUST_39839_PI426222305	1.08459	1.17333	1.14974	2.35566	1.08485	2.48285	PGSC0003DMT400047618	Jumonji domain protein	chr08	Jumonji domain protein	PGSC0003DMP400032246	PGSC0003DMG400018506	PGSC0003DMC400032246	PGSC0003DMT400047618	27.3.57	RNA.regulation of transcription.JUMONJI family	pgsc0003dmp400032246	highly similar to ( 779) AT5G46910 | Symbols: | transcription factor jumonji (jmj) family protein | chr5:19047780-19050880 FORWARDhighly similar to ( 701) loc_os10g42690 12010.m07021 protein jmjC domain containing protein, expressedJmjC PGSC0003DMT400047618
CUST_27142_PI426222305	1.08459	1.64748	1.24129	2.35351	1.10236	2.60761	PGSC0003DMT400026395	Pentatricopeptide repeat domain containing protein	chr03	Pentatricopeptide repeat domain containing protein	PGSC0003DMP400018022	PGSC0003DMG401010181	PGSC0003DMC400018022	PGSC0003DMT400026395	27.3.25	RNA.regulation of transcription.MYB domain transcription factor family	pgsc0003dmp400018022	highly similar to ( 906) AT3G02010 | Symbols: | pentatricopeptide (PPR) repeat-containing protein | chr3:337965-340442 FORWARDweakly similar to ( 108) RF1_ORYSA Rf1 protein, mitochondrial precursor (PPR protein) (Fertility restorer) (Restorer for CMS) - Oryza sativa (Rice)highly similar to ( 526) loc_os09g07780 12009.m04047 protein pentatricopeptide repeat protein PPR986-12, putative, expressed P…
CUST_19641_PI426222305	1.08459	1.17333	1.03773	2.32496	1.07226	2.2168	PGSC0003DMT400088400	DELLA protein RGL2	chr01	DELLA protein RGL2	PGSC0003DMP400060075	PGSC0003DMG400037971	PGSC0003DMC400060075	PGSC0003DMT400088400	27.3.21	RNA.regulation of transcription.GRAS transcription factor family	pgsc0003dmp400060075	weakly similar to ( 189) AT1G66350 | Symbols: RGL1, RGL | RGL1 (RGA-LIKE 1); transcription factor | chr1:24748327-24749862 FORWARDweakly similar to ( 180) GAI1_VITVI DELLA protein GAI1 (Gibberellic acid-insensitive mutant protein 1) (VvGAI1) - Vitis vinifera (Grape)weakly similar to ( 166) loc_os03g51330 12003.m10114 protein DELLA protein SLR1, putative, expressedGRAS PGSC0003DMT400088400
CUST_32240_PI426222305	1.08431	1.17304	1.04692	4.18843	1.11073	2.58128	PGSC0003DMT400012592	Basic helix-loop-helix protein	chr04	Basic helix-loop-helix protein	PGSC0003DMP400008751	PGSC0003DMG400004922	PGSC0003DMC400008751	PGSC0003DMT400012592	27.3.6	RNA.regulation of transcription.bHLH,Basic Helix-Loop-Helix family	pgsc0003dmp400008751	weakly similar to ( 182) AT1G10120 | Symbols: | DNA binding / transcription factor | chr1:3304228-3305984 REVERSEweakly similar to ( 143) loc_os03g51910 12003.m10170 protein BHLH transcription factor, putative, expressed PGSC0003DMT400012592
CUST_47964_PI426222305	1.08364	1.65037	1.09676	3.79618	1.16166	2.9681	PGSC0003DMT400074389	Aspartic proteinase nepenthesin-1	chr06	Aspartic proteinase nepenthesin-1	PGSC0003DMP400050382	PGSC0003DMG400028911	PGSC0003DMC400050382	PGSC0003DMT400074389	27.3.99	RNA.regulation of transcription.unclassified	pgsc0003dmp400050382	moderately similar to ( 474) AT1G79720 | Symbols: | aspartyl protease family protein | chr1:29997259-29998951 REVERSEmoderately similar to ( 396) loc_os09g25570 12009.m05709 protein aspartic proteinase nepenthesin-2 precursor, putative, expressedAsp PGSC0003DMT400074389		GO:0004190
CUST_49896_PI426222305	1.08329	1.35134	1.03948	3.34343	1.10799	2.9591	PGSC0003DMT400019706	DNA-directed RNA polymerase III subunit F	chr08	DNA-directed RNA polymerase III subunit F	PGSC0003DMP400013469	PGSC0003DMG402007612	PGSC0003DMC400013469	PGSC0003DMT400019706	27.3.50	RNA.regulation of transcription.General Transcription	pgsc0003dmp400013469	weakly similar to ( 167) AT5G23710 | Symbols: | DNA binding / DNA-directed RNA polymerase | chr5:7996528-7997220 REVERSEweakly similar to ( 158) loc_os06g40110 12006.m08547 protein RNA polymerase Rpc34 subunit family protein, expressedRNA_pol_Rpc34 RPC34 PGSC0003DMT400019706
CUST_48282_PI426222305	1.08283	1.68294	1.45997	3.49379	1.42688	3.17948	PGSC0003DMT400002411	Myb-like DNA-binding domain, SHAQKYF class family protein	chr07	Myb-like DNA-binding domain, SHAQKYF class family protein	PGSC0003DMP400001752	PGSC0003DMG400000922	PGSC0003DMC400001752	PGSC0003DMT400002411	27.3.20	RNA.regulation of transcription.G2-like transcription factor family, GARP	pgsc0003dmp400001752	very weakly similar to (86.3) AT2G02060 | Symbols: | transcription factor | chr2:495691-497609 FORWARDvery weakly similar to (90.9) loc_os10g39550 12010.m06726 protein myb-like DNA-binding domain, SHAQKYF class family protein PGSC0003DMT400002411		GO:0003677
CUST_4741_PI426222305	1.07993	1.45359	1.03327	2.73264	1.03715	2.07539	PGSC0003DMT400027409	Conserved gene of unknown function	chr04	Conserved gene of unknown function	PGSC0003DMP400018692	PGSC0003DMG400010571	PGSC0003DMC400018692	PGSC0003DMT400027409	27.3.68	RNA.regulation of transcription.PWWP domain protein	pgsc0003dmp400018692	moderately similar to ( 227) AT5G02950 | Symbols: | PWWP domain-containing protein | chr5:690953-692851 FORWARDmoderately similar to ( 260) loc_os05g38810 12005.m08060 protein PWWP domain containing protein, expressed PGSC0003DMT400027409	GO:0005634	GO:0003677;GO:0004674
CUST_6500_PI426222305	1.07891	1.52112	1.0323	2.97915	1.12468	3.11234	PGSC0003DMT400036861	Tubby protein	chr03	Tubby protein	PGSC0003DMP400025007	PGSC0003DMG400014215	PGSC0003DMC400025007	PGSC0003DMT400036861	27.3.31	RNA.regulation of transcription.TUB transcription factor family	pgsc0003dmp400025007	moderately similar to ( 310) AT1G16070 | Symbols: AtTLP8 | AtTLP8 (TUBBY LIKE PROTEIN 8); transcription factor | chr1:5511899-5513779 REVERSEmoderately similar to ( 257) loc_os02g08310 12002.m06177 protein tub family protein, expressed PGSC0003DMT400036861
CUST_35179_PI426222305	1.07823	1.62192	1.12146	3.29014	1.1921	3.13426	PGSC0003DMT400021503	Protein 2	chr03	Protein 2	PGSC0003DMP400014630	PGSC0003DMG400008340	PGSC0003DMC400014630	PGSC0003DMT400021503	27.3.25	RNA.regulation of transcription.MYB domain transcription factor family	pgsc0003dmp400014630	very weakly similar to (93.6) AT1G79180 | Symbols: ATMYB63, MYB63 | MYB63 (MYB DOMAIN PROTEIN 63); DNA binding / transcription activator/ transcription factor | chr1:29786509-29787589 FORWARDvery weakly similar to (90.1) MYB4_ORYSA Myb-related protein Myb4 (OsMyb4) (Transcription factor RLTR1) - Oryza sativa (Rice)very weakly similar to (90.9) loc_os02g42870 12002.m09322 protein P-type R2R3 Myb p…	GO:0005634	GO:0003677;GO:0003682
CUST_22859_PI426222305	1.0775	1.83249	1.29064	2.82576	1.36687	2.18772	PGSC0003DMT400060957	Conserved gene of unknown function	chr10	Conserved gene of unknown function	PGSC0003DMP400041031	PGSC0003DMG400023710	PGSC0003DMC400041031	PGSC0003DMT400060957	27.3.12	RNA.regulation of transcription.C3H zinc finger family	pgsc0003dmp400041031	weakly similar to ( 174) AT5G06770 | Symbols: | KH domain-containing protein / zinc finger (CCCH type) family protein | chr5:2090937-2092787 REVERSEmoderately similar to ( 269) loc_os02g10080 12002.m33595 protein zinc finger C-x8-C-x5-C-x3-H type family protein, expressed PGSC0003DMT400060957		GO:0003723;GO:0003677;GO:0008270
CUST_36036_PI426222305	1.07746	1.25597	1.03091	2.37881	1.05067	3.23433	PGSC0003DMT400042868	S1 RNA-binding domain-containing protein	chr09	S1 RNA-binding domain-containing protein	PGSC0003DMP400029079	PGSC0003DMG400016625	PGSC0003DMC400029079	PGSC0003DMT400042868	27.3.23	RNA.regulation of transcription.HSF,Heat-shock transcription factor family	pgsc0003dmp400029079	moderately similar to ( 353) AT3G23700 | Symbols: | S1 RNA-binding domain-containing protein | chr3:8531689-8533742 REVERSEmoderately similar to ( 308) loc_os03g62780 12003.m11156 protein RNA binding S1, putative, expressedrpsA rpsA RpsA PRK00087 PRK07400 VacB PGSC0003DMT400042868		GO:0003723
CUST_31794_PI426222305	1.07548	1.28645	1.0721	2.2716	1.0047	2.16688	PGSC0003DMT400085861	Type-b response regulator	chr01	Type-b response regulator	PGSC0003DMP400057536	PGSC0003DMG400035432	PGSC0003DMC400057536	PGSC0003DMT400085861	27.3.5	RNA.regulation of transcription.ARR	pgsc0003dmp400057536	weakly similar to ( 101) AT4G16110 | Symbols: ARR2 | ARR2 (ARABIDOPSIS RESPONSE REGULATOR 2); transcription factor/ two-component response regulator | chr4:9112979-9115785 FORWARDvery weakly similar to (97.1) loc_os02g08500 12002.m06196 protein two-component response regulator ARR12, putative, expressed PGSC0003DMT400085861		GO:0003677;GO:0003682
CUST_52472_PI426222305	1.07411	1.18449	1.0061	2.35473	1.08542	2.28194	PGSC0003DMT400046529	Transcription factor		Transcription factor	PGSC0003DMP400031479	PGSC0003DMG400018061	PGSC0003DMC400031479	PGSC0003DMT400046529	27.3.32	RNA.regulation of transcription.WRKY domain transcription factor family	pgsc0003dmp400031479	weakly similar to ( 114) AT4G26640 | Symbols: WRKY20, AtWRKY20 | WRKY20; transcription factor | chr4:13437298-13440693 REVERSEweakly similar to ( 121) loc_os07g39480 12007.m08190 protein OsWRKY78 - Superfamily of rice TFs having WRKY and zinc finger domains, expressedWRKY PGSC0003DMT400046529
CUST_39363_PI426222305	1.07345	1.53175	1.00515	2.71314	1.26936	2.77445	PGSC0003DMT400030389	WRKY-type transcription factor	chr09	WRKY-type transcription factor	PGSC0003DMP400020632	PGSC0003DMG400011633	PGSC0003DMC400020632	PGSC0003DMT400030389	27.3.32	RNA.regulation of transcription.WRKY domain transcription factor family	pgsc0003dmp400020632	weakly similar to ( 140) AT2G38470 | Symbols: WRKY33, ATWRKY33 | WRKY33; transcription factor | chr2:16108476-16110539 FORWARDweakly similar to ( 151) loc_os01g61080 12001.m12235 protein OsWRKY24 - Superfamily of rice TFs having WRKY and zinc finger domains, expressedWRKY PGSC0003DMT400030389
CUST_27751_PI426222305	1.07009	1.18044	1.04674	2.66657	1.11493	2.13741	PGSC0003DMT400006250	DNA binding protein	chr01	DNA binding protein	PGSC0003DMP400004318	PGSC0003DMG400002436	PGSC0003DMC400004318	PGSC0003DMT400006250	27.3.50	RNA.regulation of transcription.General Transcription	pgsc0003dmp400004318	very weakly similar to (95.1) AT3G13940 | Symbols: | DNA binding / DNA-directed RNA polymerase | chr3:4600647-4602412 REVERSE PGSC0003DMT400006250
CUST_6723_PI426222305	1.06939	1.84603	1.23455	3.99833	1.02826	3.39935	PGSC0003DMT400014702	Tetratricopeptide-like helical	chr03	Tetratricopeptide-like helical	PGSC0003DMP400010182	PGSC0003DMG400005736	PGSC0003DMC400010182	PGSC0003DMT400014702	27.3.25	RNA.regulation of transcription.MYB domain transcription factor family	pgsc0003dmp400010182	nearly identical (1071) AT4G02750 | Symbols: | pentatricopeptide (PPR) repeat-containing protein | chr4:1221116-1223461 REVERSEweakly similar to ( 119) RF1_ORYSA Rf1 protein, mitochondrial precursor (PPR protein) (Fertility restorer) (Restorer for CMS) - Oryza sativa (Rice)highly similar to ( 955) loc_os09g15800 12009.m04841 protein pentatricopeptide repeat protein PPR868-14, putative PGSC0003DMT…
CUST_3821_PI426222305	1.06936	1.55509	1.32914	3.4671	1.29688	3.65875	PGSC0003DMT400085098	BZIP family transcription factor	chr04	BZIP family transcription factor	PGSC0003DMP400056773	PGSC0003DMG400034669	PGSC0003DMC400056773	PGSC0003DMT400085098	27.3.35	RNA.regulation of transcription.bZIP transcription factor family	pgsc0003dmp400056773	weakly similar to ( 136) AT2G40950 | Symbols: BZIP17 | BZIP17; DNA binding / transcription activator/ transcription factor | chr2:17087823-17090326 REVERSE PGSC0003DMT400085098
CUST_18193_PI426222305	1.06762	1.54904	1.14819	2.61954	1.14586	2.27746	PGSC0003DMT400054947	U-box protein	chr01	U-box protein	PGSC0003DMP400036958	PGSC0003DMG400021325	PGSC0003DMC400036958	PGSC0003DMT400054947	27.3.64	RNA.regulation of transcription.PHOR1	pgsc0003dmp400036958	moderately similar to ( 298) AT2G35930 | Symbols: PUB23 | PUB23 (PLANT U-BOX 23); ubiquitin-protein ligase | chr2:15083101-15084336 REVERSEmoderately similar to ( 241) loc_os02g33590 12002.m08452 protein ubiquitin-protein ligase, putative, expressed PGSC0003DMT400054947
CUST_10757_PI426222305	1.06743	1.33011	1.15417	5.32284	1.08001	3.08304	PGSC0003DMT400032121	BEL14 protein	chr08	BEL14 protein	PGSC0003DMP400021823	PGSC0003DMG400012329	PGSC0003DMC400021823	PGSC0003DMT400032121	27.3.22	RNA.regulation of transcription.HB,Homeobox transcription factor family	pgsc0003dmp400021823	moderately similar to ( 218) AT5G41410 | Symbols: BEL1 | BEL1 (BELL 1); DNA binding / protein binding / transcription factor | chr5:16580424-16583770 FORWARDweakly similar to ( 195) loc_os10g39030 12010.m06673 protein bell-like homeodomain protein 3, putative, expressedPOX POX PGSC0003DMT400032121
CUST_26549_PI426222305	1.06638	1.42464	1.02031	4.8141	1.68212	2.70084	PGSC0003DMT400000903	MYB transcription factor MYB127	chr12	MYB transcription factor	PGSC0003DMP400000665	PGSC0003DMG400000340	PGSC0003DMC400000665	PGSC0003DMT400000903	27.3.26	RNA.regulation of transcription.MYB-related transcription factor family	pgsc0003dmp400000665	very weakly similar to (95.5) AT5G47390 | Symbols: | myb family transcription factor | chr5:19227001-19228546 FORWARDweakly similar to ( 102) loc_os01g09640 12001.m07588 protein MCB2 protein, putative, expressed PGSC0003DMT400000903		GO:0003677
CUST_39429_PI426222305	1.06559	1.74702	1.01956	2.73947	1.05739	2.72131	PGSC0003DMT400082119	Pentatricopeptide repeat-containing protein	chr09	Pentatricopeptide repeat-containing protein	PGSC0003DMP400055480	PGSC0003DMG400032270	PGSC0003DMC400055480	PGSC0003DMT400082119	27.3.25	RNA.regulation of transcription.MYB domain transcription factor family	pgsc0003dmp400055480	highly similar to ( 808) AT1G71490 | Symbols: | pentatricopeptide (PPR) repeat-containing protein | chr1:26933326-26935371 REVERSEweakly similar to ( 130) RF1_ORYSA Rf1 protein, mitochondrial precursor (PPR protein) (Fertility restorer) (Restorer for CMS) - Oryza sativa (Rice)highly similar to ( 636) loc_os07g19400 12007.m06376 protein methyltransferase small domain, putative, expressed PGSC0003D…	GO:0043231
CUST_33397_PI426222305	1.0653	1.46065	1.04479	3.45406	1.03888	2.61173	PGSC0003DMT400017859	Avr9/Cf-9 rapidly elicited protein 126	chr02	Avr9/Cf-9 rapidly elicited protein 126	PGSC0003DMP400012281	PGSC0003DMG402006935	PGSC0003DMC400012281	PGSC0003DMT400017859	27.3.32	RNA.regulation of transcription.WRKY domain transcription factor family	pgsc0003dmp400012281	weakly similar to ( 177) AT5G15130 | Symbols: WRKY72, ATWRKY72 | WRKY72; transcription factor | chr5:4904426-4906879 FORWARDweakly similar to ( 187) loc_os06g05380 12006.m91873 protein OsWRKY73 - Superfamily of rice TFs having WRKY and zinc finger domains, expressedWRKY PGSC0003DMT400017859	GO:0005634	GO:0003700;GO:0043565
CUST_26483_PI426222305	1.06508	1.67251	1.01907	3.26994	1.48906	2.0348	PGSC0003DMT400037007	Conserved gene of unknown function	chr03	Conserved gene of unknown function	PGSC0003DMP400025131	PGSC0003DMG400014264	PGSC0003DMC400025131	PGSC0003DMT400037007	27.3.35	RNA.regulation of transcription.bZIP transcription factor family	pgsc0003dmp400025131	moderately similar to ( 429) AT5G52030 | Symbols: | TraB protein-related | chr5:21128819-21130034 FORWARDmoderately similar to ( 305) loc_os08g43230 12008.m08297 protein pheromone shutdown protein, putative, expressedCOG1916 TraB PGSC0003DMT400037007	GO:0009507
CUST_144_PI426222305	1.06392	1.58776	1.0985	3.24766	1.16686	3.35242	PGSC0003DMT400022600	R2R3 transcription factor MYB108 1	chr01	R2R3 transcription factor MYB108 1	PGSC0003DMP400015397	PGSC0003DMG400008761	PGSC0003DMC400015397	PGSC0003DMT400022600	27.3.25	RNA.regulation of transcription.MYB domain transcription factor family	pgsc0003dmp400015397	moderately similar to ( 254) AT5G49620 | Symbols: AtMYB78 | AtMYB78 (myb domain protein 78); DNA binding / transcription factor | chr5:20137491-20139384 REVERSEweakly similar to ( 138) MYBA2_ORYSA Myb-related protein MYBAS2 - Oryza sativa (Rice)moderately similar to ( 248) loc_os03g20090 12003.m101325 protein MYB transcription factor, putative, expressed PGSC0003DMT400022600
CUST_46243_PI426222305	1.06228	1.16005	1.01638	2.14748	1.11857	2.50246	PGSC0003DMT400053303	Eukaryotic translation initiation factor 2c	chr12	Protein argonaute PNH1	PGSC0003DMP400035959	PGSC0003DMG400020685	PGSC0003DMC400035959	PGSC0003DMT400053303	27.3.36	RNA.regulation of transcription.Argonaute	pgsc0003dmp400035959	weakly similar to ( 196) AT1G48410 | Symbols: AGO1 | AGO1 (ARGONAUTE 1); endoribonuclease/ miRNA binding / protein binding / siRNA binding | chr1:17886285-17891892 REVERSEweakly similar to ( 194) loc_os04g47870 12004.m09728 protein PINHEAD protein, putative, expressedPiwi_ago-like Piwi Piwi-like Piwi_piwi-like_Euk PGSC0003DMT400053303
CUST_32194_PI426222305	1.06139	1.50286	1.04373	3.42466	1.04302	2.51353	PGSC0003DMT400037550	Conserved gene of unknown function	chr08	Conserved gene of unknown function	PGSC0003DMP400025522	PGSC0003DMG400014483	PGSC0003DMC400025522	PGSC0003DMT400037550	27.3.99	RNA.regulation of transcription.unclassified	pgsc0003dmp400025522	moderately similar to ( 221) AT4G13350 | Symbols: NIG | NIG (NSP (NUCLEAR SHUTTLE PROTEIN)-INTERACTING GTPASE); GTP binding / GTPase | chr4:7770170-7773321 REVERSEmoderately similar to ( 244) loc_os02g11820 12002.m33975 protein GTP-ase activating protein for Arf containing protein, putative, expressedArfGap PGSC0003DMT400037550
CUST_33870_PI426222305	1.06061	1.2533	1.04491	2.6443	1.03511	2.30347	PGSC0003DMT400012342	Developmental protein	chr06	Developmental protein	PGSC0003DMP400008576	PGSC0003DMG400004839	PGSC0003DMC400008576	PGSC0003DMT400012342	27.3.71	RNA.regulation of transcription.SNF7	pgsc0003dmp400008576	moderately similar to ( 264) AT1G17730 | Symbols: VPS46.1 | VPS46.1 (VACUOLAR PROTEIN SORTING 46.1) | chr1:6099210-6100153 FORWARDmoderately similar to ( 234) loc_os06g43590 12006.m091745 protein charged multivesicular body protein 1b, putative, expressed PGSC0003DMT400012342
CUST_38798_PI426222305	1.05976	1.62332	1.01397	2.22848	1.06499	2.21583	PGSC0003DMT400015303	Type I MADS box transcription factor	chr04	Type I MADS box transcription factor	PGSC0003DMP400010597	PGSC0003DMG400005968	PGSC0003DMC400010597	PGSC0003DMT400015303	27.3.24	RNA.regulation of transcription.MADS box transcription factor family	pgsc0003dmp400010597	PGSC0003DMT400015303
CUST_29391_PI426222305	1.0592	1.179	1.01013	2.65717	1.12151	2.53519	PGSC0003DMT400075906	Two-component sensor histidine kinase bacteria	chr04	Two-component sensor histidine kinase bacteria	PGSC0003DMP400051406	PGSC0003DMG400029514	PGSC0003DMC400051406	PGSC0003DMT400075906	27.3.5	RNA.regulation of transcription.ARR	pgsc0003dmp400051406	moderately similar to ( 269) AT4G16110 | Symbols: ARR2 | ARR2 (ARABIDOPSIS RESPONSE REGULATOR 2); transcription factor/ two-component response regulator | chr4:9112979-9115785 FORWARDvery weakly similar to (90.9) PRR95_ORYSA Two-component response regulator-like PRR95 (Pseudo-response regulator 95) (OsPRR95) - Oryza sativa (Rice)moderately similar to ( 313) loc_os03g12350 12003.m101249 protein tw…
CUST_24047_PI426222305	1.05421	1.28454	1.07064	2.25979	1.44126	2.49659	PGSC0003DMT400027728	GATA transcription factor	chr01	GATA transcription factor	PGSC0003DMP400018892	PGSC0003DMG400010684	PGSC0003DMC400018892	PGSC0003DMT400027728	27.3.9	RNA.regulation of transcription.C2C2(Zn) GATA transcription factor family	pgsc0003dmp400018892	PGSC0003DMT400027728		GO:0003700;GO:0008270;GO:0043565
CUST_11906_PI426222305	1.0536	1.64943	1.13843	2.56871	1.15554	2.82492	PGSC0003DMT400033477	Extracellular ligand-gated ion channel	chr12	Extracellular ligand-gated ion channel	PGSC0003DMP400022778	PGSC0003DMG400012860	PGSC0003DMC400022778	PGSC0003DMT400033477	27.3.3	RNA.regulation of transcription.AP2/EREBP, APETALA2/Ethylene-responsive element binding protein family	pgsc0003dmp400022778	moderately similar to ( 484) AT3G20300 | Symbols: | unknown protein | chr3:7079832-7081809 REVERSEmoderately similar to ( 277) loc_os06g42850 12006.m08815 protein expressed protein PGSC0003DMT400033477
CUST_2722_PI426222305	1.05339	1.14898	1.01046	2.3226	1.05636	2.80243	PGSC0003DMT400086207	Set domain protein	chr11	Set domain protein	PGSC0003DMP400057882	PGSC0003DMG400035778	PGSC0003DMC400057882	PGSC0003DMT400086207	27.3.69	RNA.regulation of transcription.SET-domain transcriptional regulator family	pgsc0003dmp400057882	moderately similar to ( 233) AT1G76710 | Symbols: ASHH1 | SDG26 (SET DOMAIN GROUP 26); histone-lysine N-methyltransferase | chr1:28789887-28792371 REVERSEmoderately similar to ( 239) loc_os04g34976 12004.m101808 protein SET domain-containing protein SET102, putative, expressedSET SET PGSC0003DMT400086207
CUST_33253_PI426222305	1.05327	1.16627	1.11105	2.85473	1.30777	2.88089	PGSC0003DMT400017806	LOB domain-containing protein	chr02	LOB domain-containing protein	PGSC0003DMP400012238	PGSC0003DMG400006914	PGSC0003DMC400012238	PGSC0003DMT400017806	27.3.37	RNA.regulation of transcription.AS2,Lateral Organ Boundaries Gene Family	pgsc0003dmp400012238	weakly similar to ( 196) AT3G27650 | Symbols: LBD25 | LBD25 (LOB DOMAIN-CONTAINING PROTEIN 25) | chr3:10238731-10240346 FORWARDweakly similar to ( 195) loc_os01g07480 12001.m42608 protein ramosa 2, putative, expressedDUF260 PGSC0003DMT400017806
CUST_13695_PI426222305	1.05169	1.34846	1.05456	3.15294	1.11157	2.92034	PGSC0003DMT400018075	PEThy;ZPT4-1	chr05	PEThy;ZPT4-1	PGSC0003DMP400012441	PGSC0003DMG400007023	PGSC0003DMC400012441	PGSC0003DMT400018075	27.3.11	RNA.regulation of transcription.C2H2 zinc finger family	pgsc0003dmp400012441	very weakly similar to (81.6) AT1G02040 | Symbols: | zinc finger (C2H2 type) family protein | chr1:358104-359078 REVERSEweakly similar to ( 172) loc_os04g46670 12004.m09615 protein cys2/His2 zinc-finger transcription factor, putative, expressed PGSC0003DMT400018075
CUST_15462_PI426222305	1.05046	1.49454	1.12197	2.41195	1.07551	2.09052	PGSC0003DMT400037430	ATP-dependent helicase	chr12	ATP-dependent helicase	PGSC0003DMP400025445	PGSC0003DMG400014445	PGSC0003DMC400025445	PGSC0003DMT400037430	27.3.44	RNA.regulation of transcription.Chromatin Remodeling Factors	pgsc0003dmp400025445	moderately similar to ( 259) AT1G05490 | Symbols: chr31 | chr31 (chromatin remodeling 31); ATP binding / DNA binding / helicase/ nucleic acid binding | chr1:1618795-1623195 REVERSEmoderately similar to ( 298) loc_os05g32610 12005.m07494 protein helicase conserved C-terminal domain containing protein, expressedSNF2_N PGSC0003DMT400037430
CUST_18365_PI426222305	1.04942	1.19168	1.02951	3.74306	1.01921	2.4274	PGSC0003DMT400042252	Zinc finger CCCH domain-containing protein 32	chr01	Zinc finger CCCH domain-containing protein 32	PGSC0003DMP400028654	PGSC0003DMG400016400	PGSC0003DMC400028654	PGSC0003DMT400042252	27.3.99	RNA.regulation of transcription.unclassified	pgsc0003dmp400028654	moderately similar to ( 210) AT2G02160 | Symbols: | zinc finger (CCCH-type) family protein | chr2:553407-555899 REVERSEweakly similar to ( 149) loc_os02g58440 12002.m10865 protein zinc finger C-x8-C-x5-C-x3-H type family protein, expressed PGSC0003DMT400042252		GO:0008270;GO:0003676
CUST_1980_PI426222305	1.04929	1.60627	1.02367	2.79839	1.0809	4.39929	PGSC0003DMT400021643	Histone deacetylase HDT1	chr10	Histone deacetylase HDT1	PGSC0003DMP400014738	PGSC0003DMG400008398	PGSC0003DMC400014738	PGSC0003DMT400021643	27.3.55	RNA.regulation of transcription.HDA	pgsc0003dmp400014738	very weakly similar to (82.4) AT5G03740 | Symbols: HD2C, HDT3 | HD2C (HISTONE DEACETYLASE 2C); histone deacetylase/ nucleic acid binding / transcription repressor/ zinc ion binding | chr5:981994-983961 FORWARDvery weakly similar to (81.6) HD2A_SOYBN Histone deacetylase 2a (HD2a) (Nucleolar histone deacetylase HD2-p39) - Glycine max (Soybean) PGSC0003DMT400021643
CUST_40218_PI426222305	1.0437	1.13058	1.06687	2.58365	1.31235	2.46864	PGSC0003DMT400076891	EIL1		EIL1	PGSC0003DMP400052102	PGSC0003DMG400029908	PGSC0003DMC400052102	PGSC0003DMT400076891	27.3.19	RNA.regulation of transcription.EIN3-like(EIL) transcription factor family	pgsc0003dmp400052102	moderately similar to ( 445) AT1G73730 | Symbols: EIL3, SLIM1 | EIL3 (ETHYLENE-INSENSITIVE3-LIKE3); DNA binding / transcription factor | chr1:27730434-27732363 REVERSEmoderately similar to ( 367) loc_os09g31400 12009.m06255 protein ethylene-insensitive3-like protein, putative, expressedEIN3 PGSC0003DMT400076891
CUST_28870_PI426222305	1.04362	1.89798	1.49173	2.09867	1.21891	2.29628	PGSC0003DMT400033315	DNA repair protein	chr04	DNA repair protein	PGSC0003DMP400022662	PGSC0003DMG400012796	PGSC0003DMC400022662	PGSC0003DMT400033315	27.3.44	RNA.regulation of transcription.Chromatin Remodeling Factors	pgsc0003dmp400022662	weakly similar to ( 130) AT3G24340 | Symbols: chr40 | chr40 (chromatin remodeling 40); ATP binding / DNA binding / helicase/ nucleic acid binding | chr3:8832085-8835722 REVERSEweakly similar to ( 126) loc_os05g32610 12005.m07494 protein helicase conserved C-terminal domain containing protein, expressed PGSC0003DMT400033315	GO:0005634	GO:0005524;GO:0003677;GO:0004386
CUST_42683_PI426222305	1.04196	1.21438	1.40981	3.44758	1.58761	3.42579	PGSC0003DMT400052395	MYB domain class transcription factor	chr09	MYB domain class transcription factor	PGSC0003DMP400035326	PGSC0003DMG400020338	PGSC0003DMC400035326	PGSC0003DMT400052395	27.3.25	RNA.regulation of transcription.MYB domain transcription factor family	pgsc0003dmp400035326	moderately similar to ( 277) AT3G09230 | Symbols: AtMYB1 | AtMYB1 (myb domain protein 1); DNA binding / transcription factor | chr3:2833460-2835134 FORWARDweakly similar to ( 112) MYBA2_ORYSA Myb-related protein MYBAS2 - Oryza sativa (Rice)moderately similar to ( 254) loc_os01g63160 12001.m12433 protein MYB2, putative, expressedREB1 PGSC0003DMT400052395
CUST_36067_PI426222305	1.03938	1.8855	1.44711	4.78455	1.61011	2.6665	PGSC0003DMT400058559	SOC1 1	chr08	MADS box transcription factor	PGSC0003DMP400039437	PGSC0003DMG400022748	PGSC0003DMC400039437	PGSC0003DMT400058559	27.3.24	RNA.regulation of transcription.MADS box transcription factor family	pgsc0003dmp400039437	weakly similar to ( 149) AT4G22950 | Symbols: AGL19, GL19 | AGL19 (AGAMOUS-LIKE 19); transcription factor | chr4:12023946-12027421 REVERSEweakly similar to ( 132) MAD56_ORYSA MADS-box transcription factor 56 (OsMADS56) (FDRMADS8) (RMADS214) - Oryza sativa (Rice)weakly similar to ( 132) loc_os10g39130 12010.m21952 protein MADS-box transcription factor 56, putative, expressedMADS_MEF2_like MADS MAD…	GO:0005634	GO:0003700;GO:0003677;GO:0046983
CUST_39895_PI426222305	1.03889	1.17235	1.08185	3.18267	1.38669	2.97979	PGSC0003DMT400047528	Conserved gene of unknown function	chr08	Conserved gene of unknown function	PGSC0003DMP400032181	PGSC0003DMG400018471	PGSC0003DMC400032181	PGSC0003DMT400047528	27.3.25	RNA.regulation of transcription.MYB domain transcription factor family	pgsc0003dmp400032181	moderately similar to ( 484) AT1G08070 | Symbols: | pentatricopeptide (PPR) repeat-containing protein | chr1:2514374-2516599 REVERSEweakly similar to ( 103) RF1_ORYSA Rf1 protein, mitochondrial precursor (PPR protein) (Fertility restorer) (Restorer for CMS) - Oryza sativa (Rice)moderately similar to ( 470) loc_os03g20190 12003.m07429 protein pentatricopeptide repeat protein PPR868-14, putative, e…
CUST_32913_PI426222305	1.03182	1.73541	1.50196	2.63062	1.27472	3.27801	PGSC0003DMT400003198	CONSTANS-like zinc finger protein	chr05	CONSTANS-like zinc finger protein	PGSC0003DMP400002288	PGSC0003DMG400001263	PGSC0003DMC400002288	PGSC0003DMT400003198	27.3.7	RNA.regulation of transcription.C2C2(Zn) CO-like, Constans-like zinc finger family	pgsc0003dmp400002288	moderately similar to ( 275) AT3G21880 | Symbols: | zinc finger (B-box type) family protein | chr3:7706748-7708093 FORWARDweakly similar to ( 129) loc_os02g49230 12002.m33847 protein zinc finger protein CONSTANS-LIKE 11, putative, expressed PGSC0003DMT400003198	GO:0005634	GO:0005515;GO:0003700;GO:0008270
CUST_25474_PI426222305	1.03012	1.87586	1.00264	2.92958	1.11484	2.85191	PGSC0003DMT400085102	Cys2-His2 type zinc finger protein	chr11	Cys2-His2 type zinc finger protein	PGSC0003DMP400056777	PGSC0003DMG400034673	PGSC0003DMC400056777	PGSC0003DMT400085102	27.3.11	RNA.regulation of transcription.C2H2 zinc finger family	pgsc0003dmp400056777	weakly similar to ( 116) AT1G27730 | Symbols: STZ, ZAT10 | STZ (salt tolerance zinc finger); nucleic acid binding / transcription factor/ transcription repressor/ zinc ion binding | chr1:9648302-9648985 REVERSEvery weakly similar to (96.3) ZFP1_WHEAT Zinc-finger protein 1 (WZF1) - Triticum aestivum (Wheat)very weakly similar to (99.8) loc_os12g39400 12012.m07725 protein zinc-finger protein 1, put…
CUST_19834_PI426222305	1.02667	1.53712	1.18342	2.31872	1.22105	2.08873	PGSC0003DMT400064010	Conserved gene of unknown function	chr01	Conserved gene of unknown function	PGSC0003DMP400043126	PGSC0003DMG400024880	PGSC0003DMC400043126	PGSC0003DMT400064010	27.3.67	RNA.regulation of transcription.putative transcription regulator	pgsc0003dmp400043126	moderately similar to ( 290) AT5G63700 | Symbols: | zinc finger (C3HC4 type RING finger) family protein | chr5:25493934-25497632 REVERSEmoderately similar to ( 283) loc_os01g66140 12001.m150796 protein plus-3 domain containing protein, expressed PGSC0003DMT400064010	GO:0005634	GO:0005515;GO:0003677;GO:0008270
CUST_12890_PI426222305	1.02593	1.95973	1.00565	2.70187	1.32047	2.91186	PGSC0003DMT400063326	Transcription factor	chr03	Transcription factor	PGSC0003DMP400042637	PGSC0003DMG400024632	PGSC0003DMC400042637	PGSC0003DMT400063326	27.3.29	RNA.regulation of transcription.TCP transcription factor family	pgsc0003dmp400042637	weakly similar to ( 144) AT3G02150 | Symbols: PTF1, TFPD | PTF1 (PLASTID TRANSCRIPTION FACTOR 1); transcription factor | chr3:391522-392589 FORWARDweakly similar to ( 135) loc_os01g55750 12001.m43206 protein TCP family transcription factor containing protein, expressedTCP PGSC0003DMT400063326
CUST_34467_PI426222305	1.0244	1.48357	1.21914	3.05617	1.04662	2.39524	PGSC0003DMT400055571	Conserved gene of unknown function	chr06	Conserved gene of unknown function	PGSC0003DMP400037417	PGSC0003DMG400021583	PGSC0003DMC400037417	PGSC0003DMT400055571	27.3.41	RNA.regulation of transcription.B3 transcription factor family	pgsc0003dmp400037417	weakly similar to ( 132) AT3G19184 | Symbols: | DNA binding | chr3:6637555-6639035 FORWARDmoderately similar to ( 260) loc_os01g13300 12001.m07939 protein B3 DNA binding domain containing protein, expressed PGSC0003DMT400055571
CUST_18958_PI426222305	1.01885	1.27568	1.26013	2.84925	1.2893	2.53933	PGSC0003DMT400052607	6b-interacting protein 1	chr07	6b-interacting protein 1	PGSC0003DMP400035466	PGSC0003DMG400020421	PGSC0003DMC400035466	PGSC0003DMT400052607	27.3.30	RNA.regulation of transcription.Trihelix, Triple-Helix transcription factor family	pgsc0003dmp400035466	weakly similar to ( 137) AT3G58630 | Symbols: | transcription factor | chr3:21683928-21685771 REVERSEweakly similar to ( 116) loc_os05g48690 12005.m83935 protein 6b-interacting protein 1, putative, expressed PGSC0003DMT400052607
CUST_34206_PI426222305	1.0161	1.31677	1.27182	2.70288	1.45727	2.75671	PGSC0003DMT400041126	ARF8	chr07	ARF8	PGSC0003DMP400027883	PGSC0003DMG400015919	PGSC0003DMC400027883	PGSC0003DMT400041126	27.3.4	RNA.regulation of transcription.ARF, Auxin Response Factor family	pgsc0003dmp400027883	highly similar to ( 631) AT5G37020 | Symbols: ARF8 | ARF8 (AUXIN RESPONSE FACTOR 8); transcription factor | chr5:14630151-14633916 FORWARDhighly similar to ( 889) loc_os02g06910 12002.m06038 protein auxin response factor 6, putative, expressedAuxin_resp B3 PGSC0003DMT400041126
CUST_32773_PI426222305	1.01599	1.59658	1.1418	3.53568	1.13386	3.53349	PGSC0003DMT400096970	Homeobox-leucine zipper protein 9	chr01	Homeobox-leucine zipper protein 9	PGSC0003DMP400068645	PGSC0003DMG400046541	PGSC0003DMC400068645	PGSC0003DMT400096970	27.3.22	RNA.regulation of transcription.HB,Homeobox transcription factor family	pgsc0003dmp400068645	weakly similar to ( 134) AT2G22800 | Symbols: HAT9 | HAT9; DNA binding / transcription factor | chr2:9704949-9706048 REVERSEweakly similar to ( 134) loc_os08g36220 12008.m07611 protein homeobox-leucine zipper protein HAT14, putative, expressed PGSC0003DMT400096970	GO:0005634	GO:0003700;GO:0043565
CUST_52282_PI426222305	1.01335	1.17856	1.00095	2.3289	1.02332	2.26054	PGSC0003DMT400020031	Transcription factor	chr04	Transcription factor	PGSC0003DMP400013670	PGSC0003DMG400007749	PGSC0003DMC400013670	PGSC0003DMT400020031	27.3.7	RNA.regulation of transcription.C2C2(Zn) CO-like, Constans-like zinc finger family	pgsc0003dmp400013670	moderately similar to ( 272) AT1G25440 | Symbols: | zinc finger (B-box type) family protein | chr1:8933939-8935284 REVERSEmoderately similar to ( 243) loc_os06g15330 12006.m06246 protein zinc finger protein CONSTANS-LIKE 16, putative, expressed PGSC0003DMT400020031
CUST_3190_PI426222305	1.00982	1.69912	1.32356	2.82229	1.28785	2.40744	PGSC0003DMT400000164	Ccr4-not transcription complex	chr01	Ccr4-not transcription complex	PGSC0003DMP400000124	PGSC0003DMG400000050	PGSC0003DMC400000124	PGSC0003DMT400000164	27.3.67	RNA.regulation of transcription.putative transcription regulator	pgsc0003dmp400000124	very weakly similar to (84.3) loc_os10g40780 12010.m21965 protein transcription regulator, putative, expressed PGSC0003DMT400000164
CUST_35915_PI426222305	1.00919	1.3465	1.23856	3.25474	1.40996	4.62165	PGSC0003DMT400042897	N(2),N(2)-dimethylguanosine tRNA methyltransferase	chr06	N(2),N(2)-dimethylguanosine tRNA methyltransferase	PGSC0003DMP400029093	PGSC0003DMG401016632	PGSC0003DMC400029093	PGSC0003DMT400042897	27.3.99	RNA.regulation of transcription.unclassified	pgsc0003dmp400029093	weakly similar to ( 124) AT3G56330 | Symbols: | N2,N2-dimethylguanosine tRNA methyltransferase family protein | chr3:20890250-20891933 FORWARDweakly similar to ( 110) loc_os05g25870 12005.m06879 protein RNA binding protein, putative, expressed PGSC0003DMT400042897		GO:0003723;GO:0004809
CUST_37211_PI426222305	1.00415	1.2244	1.05578	2.14241	1.13297	2.18158	PGSC0003DMT400082478	Zinc finger protein	chr04	Zinc finger family protein	PGSC0003DMP400055624	PGSC0003DMG400032559	PGSC0003DMC400055624	PGSC0003DMT400082478	27.3.99	RNA.regulation of transcription.unclassified	pgsc0003dmp400055624	weakly similar to ( 165) AT3G18620 | Symbols: | zinc finger (DHHC type) family protein | chr3:6408849-6410716 FORWARDweakly similar to ( 132) loc_os04g57819 12004.m10667 protein palmitoyltransferase ZDHHC16, putative, expressed PGSC0003DMT400082478
CUST_2335_PI426222305	1.00159	1.50686	1.39493	2.71391	1.3503	3.41799	PGSC0003DMT400072290	Transferase, transferring glycosyl groups	chr10	Transferase, transferring glycosyl groups	PGSC0003DMP400048875	PGSC0003DMG400028132	PGSC0003DMC400048875	PGSC0003DMT400072290	27.3.57	RNA.regulation of transcription.JUMONJI family	pgsc0003dmp400048875	highly similar to ( 714) AT5G06550 | Symbols: | FUNCTIONS IN: molecular_function unknown; INVOLVED IN: cell surface receptor linked signal transduction; EXPRESSED IN: 19 plant structures; EXPRESSED DURING: 12 growth stages; CONTAINS InterPro DOMAIN/s: Cyclin-like F-box (InterPro:IPR001810), Transcription factor jumonji/aspartyl beta-hydroxylase (InterPro:IPR003347), Transcription factor jumonji (…	GO:0005634	GO:0005515;GO:0016740
CUST_19385_PI426222305	0.998867	1.61764	1.41573	2.59446	1.53757	2.0971	PGSC0003DMT400072848	Protein UXT	chr05	Protein UXT	PGSC0003DMP400049283	PGSC0003DMG401028340	PGSC0003DMC400049283	PGSC0003DMT400072848	27.3.99	RNA.regulation of transcription.unclassified	pgsc0003dmp400049283	weakly similar to ( 148) AT1G26660 | Symbols: | c-myc binding protein, putative / prefoldin, putative | chr1:9212298-9213765 FORWARDmoderately similar to ( 203) loc_os07g40460 12007.m079735 protein protein UXT, putative, expressed PGSC0003DMT400072848	GO:0016272	GO:0051082
CUST_35461_PI426222305	0.993464	1.37757	1.04104	2.3796	1.35445	2.50761	PGSC0003DMT400032622	DREB1	chr08	DREB1	PGSC0003DMP400022161	PGSC0003DMG400012525	PGSC0003DMC400022161	PGSC0003DMT400032622	27.3.3	RNA.regulation of transcription.AP2/EREBP, APETALA2/Ethylene-responsive element binding protein family	pgsc0003dmp400022161	weakly similar to ( 140) AT1G12610 | Symbols: DDF1 | DDF1 (DWARF AND DELAYED FLOWERING 1); DNA binding / sequence-specific DNA binding / transcription factor | chr1:4290205-4290834 REVERSEweakly similar to ( 114) loc_os04g48350 12004.m09771 protein dehydration-responsive element-binding protein 1D, putative, expressedAP2 AP2 PGSC0003DMT400032622	GO:0005634	GO:0003700;GO:0003677
CUST_28260_PI426222305	0.990561	1.22066	1.17117	3.15457	1.93529	2.64825	PGSC0003DMT400044172	Conserved gene of unknown function	chr09	Conserved gene of unknown function	PGSC0003DMP400029949	PGSC0003DMG400017147	PGSC0003DMC400029949	PGSC0003DMT400044172	27.3.99	RNA.regulation of transcription.unclassified	pgsc0003dmp400029949	moderately similar to ( 279) AT2G05590 | Symbols: | FUNCTIONS IN: molecular_function unknown; INVOLVED IN: biological_process unknown; LOCATED IN: chloroplast; EXPRESSED IN: 23 plant structures; EXPRESSED DURING: 15 growth stages; CONTAINS InterPro DOMAIN/s: TLDc (InterPro:IPR006571); BEST Arabidopsis thaliana protein match is: unknown protein (TAIR:AT4G39870.1); Has 697 Blast hits to 689 protein…
CUST_41547_PI426222305	0.989548	1.46654	1.29498	2.97768	1.32223	2.10038	PGSC0003DMT400029683	Conserved gene of unknown function	chr10	Conserved gene of unknown function	PGSC0003DMP400020221	PGSC0003DMG400011414	PGSC0003DMC400020221	PGSC0003DMT400029683	27.3.12	RNA.regulation of transcription.C3H zinc finger family	pgsc0003dmp400020221	moderately similar to ( 230) AT5G06770 | Symbols: | KH domain-containing protein / zinc finger (CCCH type) family protein | chr5:2090937-2092787 REVERSEmoderately similar to ( 285) loc_os02g10080 12002.m33595 protein zinc finger C-x8-C-x5-C-x3-H type family protein, expressed PGSC0003DMT400029683
CUST_19605_PI426222305	0.985162	1.76299	1.11711	3.29181	1.12028	3.70959	PGSC0003DMT400023279	Pentatricopeptide repeat-containing protein	chr01	Pentatricopeptide repeat-containing protein	PGSC0003DMP400015856	PGSC0003DMG400009016	PGSC0003DMC400015856	PGSC0003DMT400023279	27.3.67	RNA.regulation of transcription.putative transcription regulator	pgsc0003dmp400015856	moderately similar to ( 434) AT1G02370 | Symbols: | pentatricopeptide (PPR) repeat-containing protein | chr1:474516-476383 FORWARDmoderately similar to ( 333) loc_os01g19490 12001.m08486 protein tetratricopeptide-like helical, putative, expressed PGSC0003DMT400023279	GO:0005739
CUST_46047_PI426222305	0.981052	1.95334	1.0356	2.25509	1.41665	2.55701	PGSC0003DMT400040462	Transcription factor	chr11	Transcription factor	PGSC0003DMP400027453	PGSC0003DMG400015668	PGSC0003DMC400027453	PGSC0003DMT400040462	27.3.25	RNA.regulation of transcription.MYB domain transcription factor family	pgsc0003dmp400027453	moderately similar to ( 266) AT5G16600 | Symbols: MYB43, AtMYB43 | MYB43 (myb domain protein 43); DNA binding / transcription factor | chr5:5438291-5440214 FORWARDmoderately similar to ( 245) ODO1_PETHY ODORANT1 protein (MYB-like protein ODO1) - Petunia hybrida (Petunia)moderately similar to ( 266) loc_os09g23620 12009.m05519 protein odorant 1 protein, putative, expressed PGSC0003DMT400040462
CUST_7379_PI426222305	0.977184	1.27902	1.45241	2.84107	1.01852	2.82567	PGSC0003DMT400025678	Zinc finger protein	chr04	Zinc finger protein	PGSC0003DMP400017498	PGSC0003DMG400009915	PGSC0003DMC400017498	PGSC0003DMT400025678	27.3.99	RNA.regulation of transcription.unclassified	pgsc0003dmp400017498	weakly similar to ( 172) AT2G33640 | Symbols: | zinc finger (DHHC type) family protein | chr2:14239500-14242240 FORWARDmoderately similar to ( 278) loc_os04g49560 12004.m09889 protein metal ion binding protein, putative, expressed PGSC0003DMT400025678
CUST_19970_PI426222305	0.976687	1.55382	1.69545	2.87459	1.12824	2.76461	PGSC0003DMT400049209	DIV3B protein	chr05	DIV3B protein	PGSC0003DMP400033233	PGSC0003DMG400019129	PGSC0003DMC400033233	PGSC0003DMT400049209	27.3.26	RNA.regulation of transcription.MYB-related transcription factor family	pgsc0003dmp400033233	moderately similar to ( 301) AT2G38090 | Symbols: | myb family transcription factor | chr2:15945278-15946775 FORWARDmoderately similar to ( 224) loc_os05g37730 12005.m07952 protein MYB-like transcription factor DIVARICATA, putative, expressed PGSC0003DMT400049209	GO:0005634	GO:0003700;GO:0003677;GO:0003682
CUST_33149_PI426222305	0.966956	1.62016	1.56056	3.09152	1.02945	3.1452	PGSC0003DMT400024680	DNA binding protein	chr08	DNA binding protein	PGSC0003DMP400016867	PGSC0003DMG402009541	PGSC0003DMC400016867	PGSC0003DMT400024680	27.3.41	RNA.regulation of transcription.B3 transcription factor family	pgsc0003dmp400016867	weakly similar to ( 163) AT2G24700 | Symbols: | transcriptional factor B3 family protein | chr2:10513049-10515288 REVERSE PGSC0003DMT400024680		GO:0003677
CUST_21894_PI426222305	0.960192	1.41286	1.03213	2.09434	1.09785	2.31126	PGSC0003DMT400090249	Transcription factor hy5	chr04	Transcription factor hy5	PGSC0003DMP400061924	PGSC0003DMG400039820	PGSC0003DMC400061924	PGSC0003DMT400090249	27.3.35	RNA.regulation of transcription.bZIP transcription factor family	pgsc0003dmp400061924	moderately similar to ( 250) AT2G40950 | Symbols: BZIP17 | BZIP17; DNA binding / transcription activator/ transcription factor | chr2:17087823-17090326 REVERSEweakly similar to ( 137) TGA1B_TOBAC TGACG-sequence-specific DNA-binding protein TGA-1B (TGA1b) (HSBF) (Fragment) - Nicotiana tabacum (Common tobacco)weakly similar to ( 166) loc_os05g34050 12005.m07637 protein DNA binding protein, putative…
CUST_31825_PI426222305	0.938025	1.54263	1.08073	3.17518	1.11172	3.37822	PGSC0003DMT400053122	DNA-binding protein 3	chr03	DNA-binding protein 3	PGSC0003DMP400035817	PGSC0003DMG400020608	PGSC0003DMC400035817	PGSC0003DMT400053122	27.3.32	RNA.regulation of transcription.WRKY domain transcription factor family	pgsc0003dmp400035817	weakly similar to ( 122) AT3G56400 | Symbols: WRKY70, ATWRKY70 | WRKY70; transcription factor/ transcription repressor | chr3:20909082-20910409 REVERSEweakly similar to ( 105) loc_os05g25770 12005.m06869 protein OsWRKY45 - Superfamily of rice TFs having WRKY and zinc finger domains, expressed PGSC0003DMT400053122	GO:0005634	GO:0003700;GO:0043565
CUST_38673_PI426222305	0.933244	1.18097	1.56609	2.63895	1.4124	3.4338	PGSC0003DMT400076197	Nucleic acid binding	chr09	Nucleic acid binding	PGSC0003DMP400051601	PGSC0003DMG400029627	PGSC0003DMC400051601	PGSC0003DMT400076197	27.3.67	RNA.regulation of transcription.putative transcription regulator	pgsc0003dmp400051601	weakly similar to ( 184) AT3G07030 | Symbols: | nucleic acid binding | chr3:2223001-2225254 REVERSEweakly similar to ( 178) loc_os03g06980 12003.m06215 protein TATA-binding protein-associated factor 2N, putative, expressedAlba PGSC0003DMT400076197
CUST_43690_PI426222305	0.922925	1.43517	1.33997	2.71138	1.77305	2.11535	PGSC0003DMT400004866	Domains rearranged methyltransferase		DNA methyltransferase	PGSC0003DMP400003449	PGSC0003DMG400001934	PGSC0003DMC400003449	PGSC0003DMT400004866	27.3.46	RNA.regulation of transcription.DNA methyltransferases	pgsc0003dmp400003449	moderately similar to ( 494) AT5G14620 | Symbols: DRM2, DMT7 | DRM2 (DOMAINS REARRANGED METHYLTRANSFERASE 2); N-methyltransferase | chr5:4715429-4718578 REVERSEhighly similar to ( 506) loc_os03g02010 12003.m34978 protein DNA cytosine methyltransferase Zmet3, putative, expressed PGSC0003DMT400004866
CUST_3063_PI426222305	0.909649	1.1409	1.07124	3.60752	1.67884	2.63241	PGSC0003DMT400000162	Ccr4-not transcription complex	chr01	Ccr4-not transcription complex	PGSC0003DMP400000122	PGSC0003DMG400000049	PGSC0003DMC400000122	PGSC0003DMT400000162	27.3.67	RNA.regulation of transcription.putative transcription regulator	pgsc0003dmp400000122	very weakly similar to (97.8) AT1G02080 | Symbols: | transcriptional regulator-related | chr1:373694-386682 FORWARD PGSC0003DMT400000162
CUST_2194_PI426222305	0.9052	1.13457	1.56501	2.29509	1.75233	3.26872	PGSC0003DMT400072257	Transcription factor	chr10	MYB domain class transcription factor	PGSC0003DMP400048853	PGSC0003DMG400028119	PGSC0003DMC400048853	PGSC0003DMT400072257	27.3.25	RNA.regulation of transcription.MYB domain transcription factor family	pgsc0003dmp400048853	very weakly similar to (86.7) loc_os01g16810 12001.m08277 protein DNA binding protein, putative, expressed PGSC0003DMT400072257
CUST_5374_PI426222305	0.89783	1.99313	1.93404	2.92967	1.28511	3.95301	PGSC0003DMT400009117	GATA transcription factor 5	chr09	GATA transcription factor 5	PGSC0003DMP400006324	PGSC0003DMG400003545	PGSC0003DMC400006324	PGSC0003DMT400009117	27.3.9	RNA.regulation of transcription.C2C2(Zn) GATA transcription factor family	pgsc0003dmp400006324	weakly similar to ( 147) AT3G51080 | Symbols: | zinc finger (GATA type) family protein | chr3:18973639-18974668 FORWARDweakly similar to ( 128) loc_os02g43150 12002.m100295 protein GATA zinc finger family protein, expressed PGSC0003DMT400009117
CUST_52215_PI426222305	0.87905	1.96121	1.29311	4.61341	1.50583	3.40213	PGSC0003DMT400075156	Gene of unknown function		Gene of unknown function	PGSC0003DMP400050905	PGSC0003DMG400029237	PGSC0003DMC400050905	PGSC0003DMT400075156	27.3.7	RNA.regulation of transcription.C2C2(Zn) CO-like, Constans-like zinc finger family	pgsc0003dmp400050905	PGSC0003DMT400075156
CUST_43708_PI426222305	0.876927	1.28391	1.46335	2.54592	1.13579	2.09604	PGSC0003DMT400004832	BHLH domain class transcription factor		BHLH domain class transcription factor	PGSC0003DMP400003422	PGSC0003DMG400001919	PGSC0003DMC400003422	PGSC0003DMT400004832	27.3.6	RNA.regulation of transcription.bHLH,Basic Helix-Loop-Helix family	pgsc0003dmp400003422	moderately similar to ( 245) AT1G69010 | Symbols: BIM2 | BIM2 (BES1-interacting Myc-like protein 2); DNA binding / transcription factor | chr1:25941804-25943599 FORWARDweakly similar to ( 175) loc_os08g38210 12008.m080196 protein transcription factor BIM2, putative, expressed PGSC0003DMT400004832
CUST_2657_PI426222305	0.85873	1.90399	1.22521	3.16607	1.6705	2.84212	PGSC0003DMT400048352	TAGL12 transcription factor	chr09	TAGL12 transcription factor	PGSC0003DMP400032740	PGSC0003DMG401018787	PGSC0003DMC400032740	PGSC0003DMT400048352	27.3.24	RNA.regulation of transcription.MADS box transcription factor family	pgsc0003dmp400032740	weakly similar to ( 150) AT1G71692 | Symbols: AGL12, XAL1 | AGL12 (AGAMOUS-LIKE 12); transcription factor | chr1:26952903-26954939 REVERSEweakly similar to ( 143) MAD26_ORYSA MADS-box transcription factor 26 (OsMADS26) (FDRMADS3) (RMADS220) - Oryza sativa (Rice)weakly similar to ( 143) loc_os08g02070 12008.m04353 protein MADS-box transcription factor 26, putative, expressedMADS_MEF2_like MADS MAD…	GO:0005634	GO:0003700;GO:0003677;GO:0046983;GO:0032440
CUST_24574_PI426222305	0.85377	1.63978	1.24329	3.58145	1.04145	2.3328	PGSC0003DMT400054617	Vacuolar protein sorting-associated protein 2 homolog 2	chr07	Vacuolar protein sorting-associated protein 2 homolog 2	PGSC0003DMP400036747	PGSC0003DMG400021197	PGSC0003DMC400036747	PGSC0003DMT400054617	27.3.71	RNA.regulation of transcription.SNF7	pgsc0003dmp400036747	weakly similar to ( 189) AT5G44560 | Symbols: VPS2.2 | VPS2.2 | chr5:17946516-17948222 FORWARDweakly similar to ( 195) loc_os03g43860 12003.m09427 protein charged multivesicular body protein 2a, putative, expressed PGSC0003DMT400054617
CUST_43062_PI426222305	0.835109	1.16773	1.10295	3.43712	1.62724	2.44984	PGSC0003DMT400045734	Transcription factor	chr02	Transcription factor	PGSC0003DMP400030991	PGSC0003DMG400017734	PGSC0003DMC400030991	PGSC0003DMT400045734	27.3.65	RNA.regulation of transcription.Polycomb Group (PcG)	pgsc0003dmp400030991	moderately similar to ( 352) AT1G16690 | Symbols: | transcription factor-related | chr1:5706458-5709371 FORWARDmoderately similar to ( 321) loc_os09g11270 12009.m04390 protein enhancer of polycomb-like protein, putative, expressed PGSC0003DMT400045734
CUST_40111_PI426222305	0.827454	1.91483	1.49138	6.14433	1.47996	6.24487	PGSC0003DMT400015093	Aspartic proteinase nepenthesin-2	chr06	Aspartic proteinase nepenthesin-2	PGSC0003DMP400010450	PGSC0003DMG400005901	PGSC0003DMC400010450	PGSC0003DMT400015093	27.3.99	RNA.regulation of transcription.unclassified	pgsc0003dmp400010450	moderately similar to ( 440) AT3G52500 | Symbols: | aspartyl protease family protein | chr3:19465644-19467053 REVERSEmoderately similar to ( 303) loc_os04g58840 12004.m10764 protein aspartic proteinase nepenthesin-2 precursor, putative, expressedAsp PGSC0003DMT400015093
CUST_13456_PI426222305	0.824173	1.3173	1.23794	2.45783	1.1638	3.04568	PGSC0003DMT400017414	MADS-box protein 9	chr05	MADS-box protein 9	PGSC0003DMP400011974	PGSC0003DMG401006771	PGSC0003DMC400011974	PGSC0003DMT400017414	27.3.24	RNA.regulation of transcription.MADS box transcription factor family	pgsc0003dmp400011974	weakly similar to ( 154) AT5G13790 | Symbols: AGL15 | AGL15 (AGAMOUS-LIKE 15); DNA binding / transcription factor | chr5:4449128-4450802 REVERSEweakly similar to ( 159) AGL15_BRANA Agamous-like MADS-box protein AGL15 - Brassica napus (Rape)weakly similar to ( 128) loc_os02g45770 12002.m09614 protein MADS-box transcription factor 6, putative, expressedMADS_MEF2_like MADS MADS MADS_SRF_like PGSC000…
CUST_41411_PI426222305	0.800245	1.44794	1.10542	3.63944	1.14043	4.58309	PGSC0003DMT400008043	Salt-tolerance protein	chr01	Salt-tolerance protein	PGSC0003DMP400005592	PGSC0003DMG400003109	PGSC0003DMC400005592	PGSC0003DMT400008043	27.3.7	RNA.regulation of transcription.C2C2(Zn) CO-like, Constans-like zinc finger family	pgsc0003dmp400005592	very weakly similar to (86.7) loc_os09g35880 12009.m06539 protein salt tolerance-like protein, putative, expressed PGSC0003DMT400008043
CUST_51050_PI426222305	0.68014	1.1126	1.60084	4.70749	1.61578	2.8095	PGSC0003DMT400002803	AT hook motif-containing protein	chr12	AT hook motif-containing protein	PGSC0003DMP400002026	PGSC0003DMG400001090	PGSC0003DMC400002026	PGSC0003DMT400002803	27.3.67	RNA.regulation of transcription.putative transcription regulator	pgsc0003dmp400002026	very weakly similar to (99.4) AT5G54930 | Symbols: | AT hook motif-containing protein | chr5:22305897-22306839 REVERSE PGSC0003DMT400002803
CUST_37953_PI426222305	0.54329	1.66999	1.07203	3.71051	1.69311	2.76957	PGSC0003DMT400079464	Cytosine-specific methyltransferase	chr04	Cytosine-specific methyltransferase	PGSC0003DMP400053888	PGSC0003DMG400030941	PGSC0003DMC400053888	PGSC0003DMT400079464	27.3.46	RNA.regulation of transcription.DNA methyltransferases	pgsc0003dmp400053888	nearly identical (1757) AT5G49160 | Symbols: MET1, MET2, METI, DDM2, DMT01, DMT1 | MET1 (METHYLTRANSFERASE 1); methyltransferase | chr5:19932501-19938186 FORWARDmoderately similar to ( 206) CMT1_MAIZE DNA (cytosine-5)-methyltransferase 1 (EC 2.1.1.37) (Chromomethylase 1) (Zea methyltransferase2) (Zmet2) (DNA cytosine methyltransferase MET2a) - Zea mays (Maize)highly similar to ( 682) loc_os07g085…	GO:0005634	GO:0003677;GO:0016746;GO:0003886
CUST_26017_PI426222305	1.00696	0.957922	1.09462	3.10658	1.51653	2.19311	PGSC0003DMT400051835	Methyl binding domain protein	chr06	Methyl binding domain protein	PGSC0003DMP400034905	PGSC0003DMG402020117	PGSC0003DMC400034905	PGSC0003DMT400051835	27.3.59	RNA.regulation of transcription.Methyl binding domain proteins	pgsc0003dmp400034905	PGSC0003DMT400051835
CUST_27535_PI426222305	1.60632	1.04543	0.811835	2.7547	1.28124	2.6764	PGSC0003DMT400070881	Transcription factor TGA7	chr04	Transcription factor TGA7	PGSC0003DMP400047929	PGSC0003DMG400027562	PGSC0003DMC400047929	PGSC0003DMT400070881	27.3.35	RNA.regulation of transcription.bZIP transcription factor family	pgsc0003dmp400047929	very weakly similar to (99.4) AT5G65210 | Symbols: TGA1 | TGA1; DNA binding / calmodulin binding / transcription factor | chr5:26059353-26060749 FORWARD PGSC0003DMT400070881
CUST_35884_PI426222305	1.39418	1.82089	0.99041	3.43334	1.09003	3.29259	PGSC0003DMT400090454	DNA binding protein	chr06	DNA binding protein	PGSC0003DMP400062129	PGSC0003DMG400040025	PGSC0003DMC400062129	PGSC0003DMT400090454	27.3.41	RNA.regulation of transcription.B3 transcription factor family	pgsc0003dmp400062129	weakly similar to ( 109) AT5G42700 | Symbols: | transcriptional factor B3 family protein | chr5:17122171-17124177 FORWARDweakly similar to ( 103) loc_os06g09420 12006.m05661 protein DNA binding protein, putative, expressed PGSC0003DMT400090454		GO:0003677
CUST_40636_PI426222305	1.35271	1.67098	0.910157	3.01635	1.1824	2.82202	PGSC0003DMT400056430	Cuticular water permeability	chr02	Cuticular water permeability	PGSC0003DMP400037964	PGSC0003DMG400021924	PGSC0003DMC400037964	PGSC0003DMT400056430	27.3.22	RNA.regulation of transcription.HB,Homeobox transcription factor family	pgsc0003dmp400037964	moderately similar to ( 322) AT4G38260 | Symbols: | unknown protein | chr4:17937077-17938210 REVERSEmoderately similar to ( 268) loc_os09g15480 12009.m04809 protein Ser/Thr-rich protein T10 in DGCR region, putative, expressedDUF833 COG3332 PGSC0003DMT400056430
CUST_14663_PI426222305	1.34503	1.28079	0.964904	2.02511	1.24086	2.53126	PGSC0003DMT400066310	DNA binding protein	chr01	Conserved gene of unknown function	PGSC0003DMP400044696	PGSC0003DMG400025790	PGSC0003DMC400044696	PGSC0003DMT400066310	27.3.41	RNA.regulation of transcription.B3 transcription factor family	pgsc0003dmp400044696	weakly similar to ( 142) AT3G19184 | Symbols: | DNA binding | chr3:6637555-6639035 FORWARDweakly similar to ( 132) loc_os03g08620 12003.m06370 protein DNA binding protein, putative, expressed PGSC0003DMT400066310
CUST_29559_PI426222305	1.29578	1.82685	0.946234	3.13166	1.11561	3.45474	PGSC0003DMT400075981	Transcription factor	chr08	Transcription factor	PGSC0003DMP400051455	PGSC0003DMG400029553	PGSC0003DMC400051455	PGSC0003DMT400075981	27.3.30	RNA.regulation of transcription.Trihelix, Triple-Helix transcription factor family	pgsc0003dmp400051455	weakly similar to ( 134) AT4G31270 | Symbols: | transcription factor | chr4:15183291-15184503 REVERSE PGSC0003DMT400075981
CUST_12879_PI426222305	1.23632	1.30079	0.954294	2.17828	1.1552	2.14309	PGSC0003DMT400063394	DNA excision repair protein ERCC-1	chr03	Excision repair cross-complementing 1 ercc1	PGSC0003DMP400042686	PGSC0003DMG400024658	PGSC0003DMC400042686	PGSC0003DMT400063394	27.3.67	RNA.regulation of transcription.putative transcription regulator	pgsc0003dmp400042686	moderately similar to ( 205) AT3G05210 | Symbols: ERCC1, UVR7 | ERCC1; 5'-flap endonuclease | chr3:1479591-1481823 FORWARDmoderately similar to ( 206) loc_os10g37490 12010.m06537 protein mating-type switching protein swi10, putative, expressedRad10 PGSC0003DMT400063394	GO:0005634	GO:0004519;GO:0003684
CUST_8969_PI426222305	1.18631	1.35213	0.986865	2.55971	1.09736	3.11289	PGSC0003DMT400089018	Zinc finger family protein	chr03	Zinc finger family protein	PGSC0003DMP400060693	PGSC0003DMG400038589	PGSC0003DMC400060693	PGSC0003DMT400089018	27.3.9	RNA.regulation of transcription.C2C2(Zn) GATA transcription factor family	pgsc0003dmp400060693	weakly similar to ( 163) AT5G66320 | Symbols: | zinc finger (GATA type) family protein | chr5:26496208-26497309 REVERSEweakly similar to ( 129) loc_os02g43150 12002.m100295 protein GATA zinc finger family protein, expressed PGSC0003DMT400089018
CUST_24521_PI426222305	1.1361	1.48702	0.942486	3.48731	1.24054	2.59217	PGSC0003DMT400054374	Nucleic acid binding protein	chr07	Nucleic acid binding protein	PGSC0003DMP400036577	PGSC0003DMG400021105	PGSC0003DMC400036577	PGSC0003DMT400054374	27.3.67	RNA.regulation of transcription.putative transcription regulator	pgsc0003dmp400036577	moderately similar to ( 226) AT1G30680 | Symbols: | toprim domain-containing protein | chr1:10881665-10886060 FORWARDmoderately similar to ( 236) loc_os06g45980 12006.m09126 protein nucleic acid binding protein, putative, expressed PGSC0003DMT400054374
CUST_49832_PI426222305	1.13606	1.64573	0.980713	3.31326	1.13593	3.53725	PGSC0003DMT400028231	MYB transcription factor MYB139	chr06	MYB transcription factor MYB139	PGSC0003DMP400019227	PGSC0003DMG402010883	PGSC0003DMC400019227	PGSC0003DMT400028231	27.3.25	RNA.regulation of transcription.MYB domain transcription factor family	pgsc0003dmp400019227	weakly similar to ( 105) AT3G46130 | Symbols: MYB111, PFG3, ATMYB48-2 | MYB111 (MYB DOMAIN PROTEIN 111); DNA binding / transcription factor | chr3:16945465-16946376 FORWARDweakly similar to ( 104) MYBA2_ORYSA Myb-related protein MYBAS2 - Oryza sativa (Rice)weakly similar to ( 104) loc_os12g37970 12012.m56456 protein MYB59, putative, expressed PGSC0003DMT400028231
CUST_39626_PI426222305	1.12921	1.29031	0.975433	2.48118	1.07823	2.51584	PGSC0003DMT400068478	Mutant cincinnata	chr10	Mutant cincinnata	PGSC0003DMP400046265	PGSC0003DMG400026626	PGSC0003DMC400046265	PGSC0003DMT400068478	27.3.29	RNA.regulation of transcription.TCP transcription factor family	pgsc0003dmp400046265	weakly similar to ( 110) AT2G31070 | Symbols: TCP10 | TCP10 (TCP DOMAIN PROTEIN 10); transcription factor | chr2:13220984-13222069 REVERSEweakly similar to ( 113) loc_os01g11550 12001.m07772 protein mutant cincinnata, putative, expressedTCP PGSC0003DMT400068478
[truncated: 1,097 more rows]

## Sheet: Table S18 BIN27 Down_236
Flags are Present or Marginal	WL6h	B6h	R6h	WL24h	B24h	R24h	PrimaryAccession	UniRef based putative functional annotation	Chromosome	putative function	peptide ID	gene ID	CDS ID	transcript ID	MpMan bin	MapMan name	MapMan pep	MapMan description	GO: CC	GO: MF	GO: BP
[truncated: 236 more rows]
